# Supplementary material
Source: PubMed Central journal article supplement (PMC11661924)

## Supporting Information

# Aminoborate-Catalyzed Reductive Counterreactions for Oxidative Electrosynthetic Transformations

Ryan E. Smith, Long P. Dinh, Christo S. Sevov\*

Department of Chemistry and Biochemistry, The Ohio State University, 151 W Woodruff Avenue,  
Columbus, OH 43210, United States

\*Correspondence to: sevov.1@osu.edu

### Table of Contents

|                                                                                                 |     |
|-------------------------------------------------------------------------------------------------|-----|
| General Remarks.....                                                                            | S3  |
| Electrochemical Cell Setup.....                                                                 | S4  |
| Additional Reaction Parameters Tested During Development .....                                  | S6  |
| Effect of Different Additives on Chlorodeborylation Yield .....                                 | S6  |
| Effect of Electrolyte on Chlorodeborylation Reaction .....                                      | S8  |
| Reaction Development for electron rich arenes.....                                              | S8  |
| Reaction Development for electron poor arenes.....                                              | S9  |
| Reaction Scope utilizing LiCl and 25 °C .....                                                   | S9  |
| Low yielding substrate scope .....                                                              | S10 |
| Electrochemical Bromination Conditions for some Aryl-BF <sub>3</sub> K Substrates .....         | S10 |
| Current Profile With and Without Pulsing.....                                                   | S11 |
| Divided Cell Reaction .....                                                                     | S11 |
| Time-point study of aryl chloride yield vs capacity .....                                       | S13 |
| NMR Analysis of Cathode Fouling Layer .....                                                     | S13 |
| Cyclic Voltammograms found in Manuscript Figure 2.....                                          | S14 |
| Cyclic Voltammograms found in Manuscript Figure 3b .....                                        | S15 |
| Cyclic Voltammograms of Aryl-BF <sub>3</sub> + pyridine complexes .....                         | S16 |
| Cyclic Voltammograms of very electron rich and very electron poor aryl trifluoroborate salts .. | S17 |
| NMR Analysis of Aryl-BF <sub>2</sub> -Py .....                                                  | S18 |
| <sup>1</sup> H-NMR Analysis of HER Post-Electrolysis .....                                      | S19 |
| <sup>2</sup> H-NMR Analysis of Deuterated Co-solvent Post-Electrolysis .....                    | S20 |
| NMR analysis and CV Analysis of Aryl-Boronic acid-amine Lewis Acid-Base Adduct.....             | S21 |
| Experimental Section.....                                                                       | S22 |
| General Procedure for Aryl-BF <sub>3</sub> K Synthesis.....                                     | S22 |

|                                                                              |     |
|------------------------------------------------------------------------------|-----|
| General Procedure A for Electrochemical Chloro-deborylation .....            | S22 |
| General Procedure B for Electrochemical Chloro-deborylation .....            | S22 |
| General Procedure C for Electrochemical Chloro-deborylation.....             | S23 |
| General Procedure D for Electrochemical Bromo-deborylation.....              | S23 |
| Characterization of Starting Materials .....                                 | S24 |
| Characterization of Isolated Products .....                                  | S28 |
| Sample Preparation for 4-fluorophenyl-BF <sub>2</sub> -Py complex (3a) ..... | S32 |
| Sample Preparation for 4-biphenyl-BF <sub>2</sub> -Py Crystal (3b).....      | S32 |
| X-Ray Crystallography of 4-biphenyldifluoropyridiniumborate (3b).....        | S32 |
| References.....                                                              | S40 |

## General Remarks

Unless otherwise noted, all experiments were conducted under a dry atmosphere of nitrogen, and reaction cells were assembled in a nitrogen-filled glove box. Anhydrous, degassed acetonitrile (MeCN) was obtained by sparging with nitrogen for 1 hour and storing over 3 Å molecular sieves for at least 24 hours prior to use. Aryl boronic acids were purchased from chemical suppliers and were converted to the aryl trifluoroborate salt following procedures reported in the literature unless otherwise stated.<sup>1</sup> All chloride salts and electrolytes were dried in a vacuum oven for at least 24 hours and stored in a nitrogen filled glove box before use. Protic solvents (1,1,1,3,3,3-hexafluoroisopropanol (HFIP), 2,2,2-trifluoroethanol (TFE), Methanol (MeOH), and glacial acetic acid (AcOH) were stored over 3 Å molecular sieves in sealed bottles under ambient atmosphere.

<sup>1</sup>H NMR spectra were obtained at 400 or 600 MHz and chemical shifts were recorded relative to CHCl<sub>3</sub> in CDCl<sub>3</sub> (δ7.26 ppm). <sup>13</sup>C NMR were obtained at 101 MHz and chemical shifts were recorded relative to CDCl<sub>3</sub> (δ 77.16 ppm). <sup>19</sup>F NMR were obtained at 376 MHz. Quantitative <sup>19</sup>F NMR used for reaction development analysis utilized 1,3,5-trifluorobenzene as the internal standard to which chemical shifts were recorded relative to (δ -108.00 ppm). Proof of purity is demonstrated by copies of NMR spectra and high-resolution mass spectrometry. NMR multiplicities are reported as follows: singlet (s), doublet (d), triplet (t), quartet (q), multiplet (m), broad signal (br). GC analysis was performed on an Agilent 7890B GC equipped with an HP-5 column (30 m x 0.32 mm x 0.25 μm film) and an FID detector. Quantitative GC analysis was performed by adding dodecane as an internal standard to the reaction mixture upon completion of the reaction. Response factors for the products relative to the internal standard were measured for reaction development. HRMS was obtained using Bruker Elute SP HPLC with Bruker Impact II QqTOF Mass Spectrometer or Thermo Orbitrap Esploris MX LC-MS.

All electrochemical analyses were carried out in a nitrogen-filled glovebox. Supporting electrolytes were dried in a vacuum oven at 120 °C for 24 hours prior to use. Cyclic voltammetry was performed with a Biologic VSP multichannel potentiostat/galvanostat. Cyclic voltammetry was carried out in a three-electrode electrochemical cell, consisting of either a glassy carbon disk working electrode (3.0 mm diameter, 0.07 cm<sup>2</sup>, BASi) or a platinum disk working electrode (1.6 mm diameter, 0.02 cm<sup>2</sup>, BASi), a Ag/Ag<sup>+</sup> quasi-reference electrode (BASi) with 0.01 M AgBF<sub>4</sub> (Sigma) and 0.10 M supporting electrolyte (see experimental details) in MeCN, and a platinum wire counter electrode (23 cm, ALS). The glassy carbon disk electrode and the platinum disk electrode were polished in a nitrogen-filled glovebox using diamond polish (15 μm, BASi) and anhydrous MeCN. All experiments were performed at a scan rate of 100 mV/s in a MeCN solution containing 0.1 M supporting electrolyte unless otherwise noted. Reference electrodes were calibrated against an internal voltage reference of ferrocene (1-10 mM). Reactions were conducted as two-electrode cells with a LANHE LAND battery testing system using platinum mesh (30 mm x 5 mm x 0.5 mm, purchased from Jiangsu Plaza Premium Electric Instrument Co.,Ltd [Alibaba]) and reticulated vitreous carbon (RVC) (60 ppi, 35 mm x 7.5 mm x 4 mm, purchased from ERG Aerospace Corp.) electrodes. Reactions were conducted in Fisherband disposable borosilicate glass tubes with a threaded end (16 mm x 100 mm).

**Safety Note:** The electrochemical chlorodeborylation reactions are performed at 80 °C using acetonitrile (boiling point 82 °C) as solvent in a sealed reaction vessel. Heating solvents close to or past their boiling point in a sealed vessel poses a risk of pressure build up and potential explosion.

## Electrochemical Cell Setup

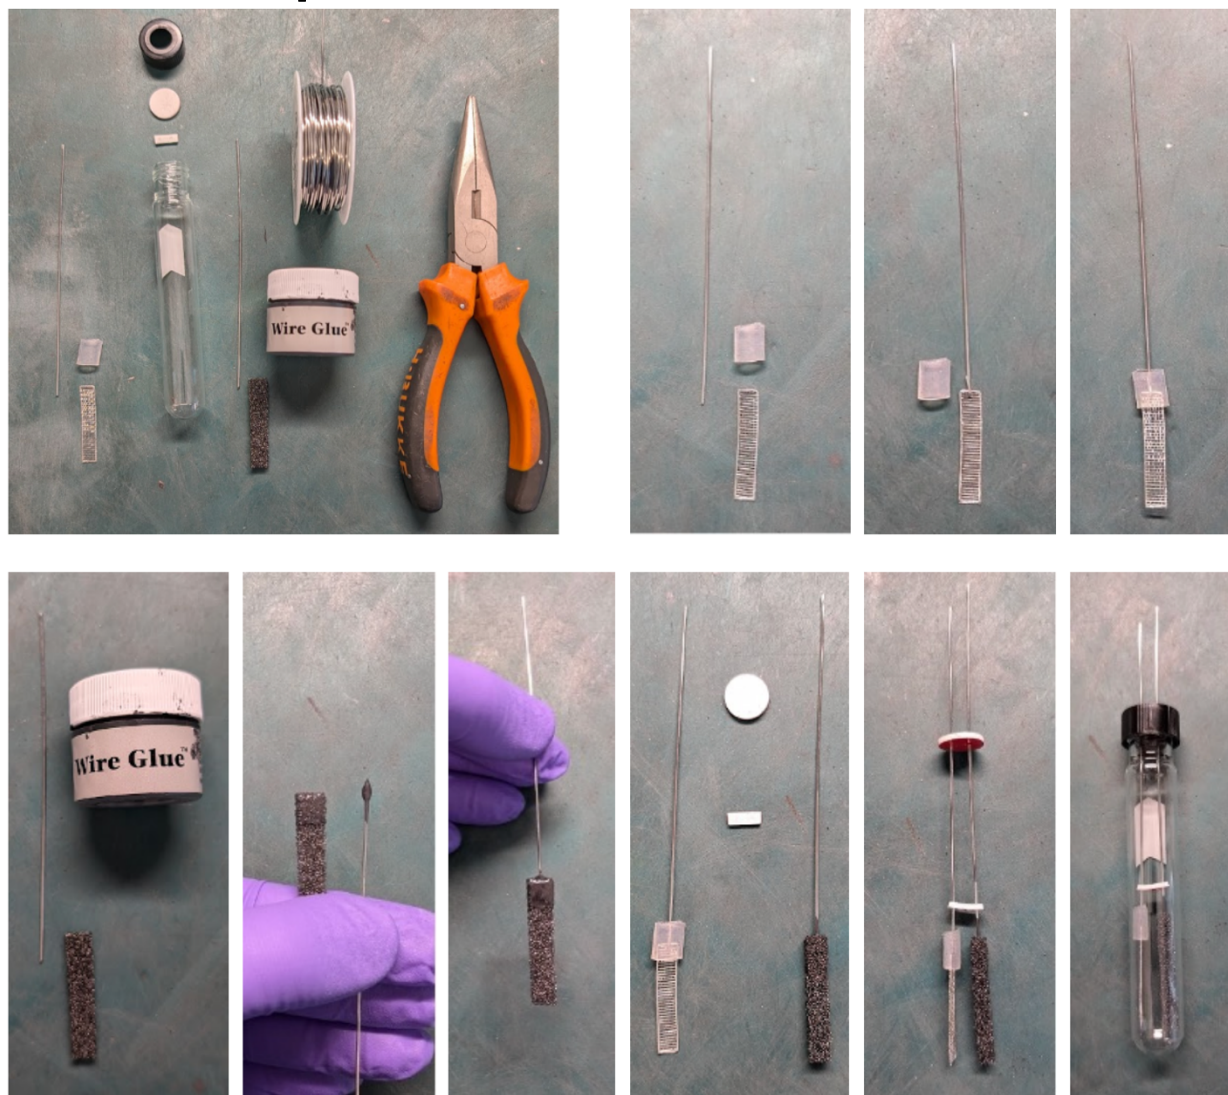

**Figure S1:** Guide for electrochemical cell setup

1. Materials Required: 12 mL threaded reaction test tube, threaded test tube cap, PTFE septa (2), 20 D Chromel A wire, wire glue, 60 ppi RVC, Platinum Mesh, PTFE Tubing (3/16" ID, 1/4" OD, 1/32" WT), needle nose pliers with wire cutters. *Note: Copper wire cannot be used due to the oxidizing conditions and the generation of  $Cl^+/Cl_2$*
2. Cut and straighten a 10 cm segment of chromel wire.
3. Using the pliers, bend a hook at one end of the wire.
4. Place that wire through one of the mesh holes right below the top bar and gently crimp. Place the PTFE tubing over the connection.
5. Cut a 3.5 cm x 0.75 cm x 0.4 cm sheet of RVC and another 10 cm segment of chromel wire.
6. Dip the RVC sheet into the wire glue to a depth of ~ 0.5 cm. Dip the chromel wire into the glue to a depth of ~ 0.5 cm.
7. Pierce the chromel wire into the RVC, making sure to not penetrate past the wire glue coverage. Cure overnight at room temperature or in the oven for a few hours.
8. Cut one PTFE septa into a 1.0 cm x 0.3 cm rectangle
9. Pierce the RVC electrode and the platinum mesh electrode through the rectangular piece of PTFE septa followed by the circular septa, with a wire separation distance of roughly 0.7 cm.

10. Place this assembly into the reaction vial and screw on the screw-cap to seal.

## Additional Reaction Parameters Tested During Development

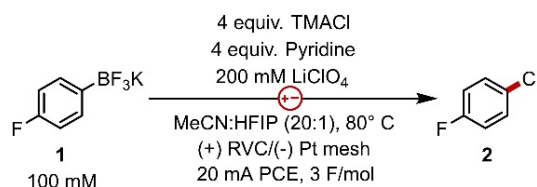

| Entry | Reaction Variable       | % yield Ar-Cl | E <sub>cell</sub> |
|-------|-------------------------|---------------|-------------------|
| 1     | -                       | >95           | 1.8 V             |
| 2     | 40° C                   | >95           | 2.6 V             |
| 3     | 25° C                   | >95           | 2.7 V             |
| 4     | LiCl instead of TMACl   | >95           | 3.3 V             |
| 5     | NaCl instead of TMACl   | 9             | >5.0 V            |
| 6     | KCl instead of TMACl    | 30            | 1.8 V             |
| 7     | (+)RVC/(-)RVC           | 6             | >5.0 V            |
| 8     | (+) Pt Mesh/(-) Pt Mesh | >95           | 1.8 V             |
| 9     | (+)Graphite/(-)Pt Plate | >95           | 2.6 V             |

**Table S1:** Control reactions for the chlorodeborylation of potassium 4-fluorophenyltrifluoroborate (**1**).

All reactions were carried out on a 0.30 mmol scale following General Procedure A unless otherwise noted. Reactions were analyzed with <sup>19</sup>F-NMR using 1,3,5-trifluorobenzene as internal standard. HFIP= 1,1,1,3,3,3-hexafluoroisopropanol, PCE= Pulsed current electrolysis (60s on 30 s off), TMACl= tetramethylammonium chloride, RVC= Reticulated Vitreous Carbon.

## Effect of Different Additives on Chlorodeborylation Yield

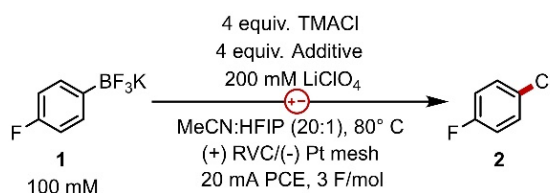

| Entry | Additive                  | % yield Ar-Cl | E <sub>cell</sub> |
|-------|---------------------------|---------------|-------------------|
| 1     | -                         | 11            | 4.0 V             |
| 2     | Triethylamine             | 0             | 2.3 V             |
| 3     | DBU                       | 0             | >5.0 V            |
| 4     | Pipridine                 | 0             | 2.8 V             |
| 5     | Pyrrole                   | 0             | 2.1 V             |
| 6     | Pyridine                  | 95            | 1.8 V             |
| 7     | 4-Methoxypyridine         | 77            | 2.8 V             |
| 8     | 2,4,6-collidine           | 83            | 2.5 V             |
| 9     | 4-trifluoromethylpyridine | 91            | 2.3 V             |
| 10    | Methyl isonicotinate      | >95           | 2.1 V             |

**Table S2:** Reactions analyzing the effect of additives on the chlorodeborylation of **1**.

All reactions were carried out on a 0.30 mmol scale following General Procedure A unless otherwise noted. Reactions were analyzed with <sup>19</sup>F-NMR using 1,3,5-trifluorobenzene as internal standard. HFIP= 1,1,1,3,3,3-

hexafluoroisopropanol, PCE= Pulsed current electrolysis (60s on 30 s off), TMACl= tetramethylammonium chloride, RVC= Reticulated Vitreous Carbon. DBU= 1,8-Diazabicyclo[5.4.0]undec-7-ene.

## Effect of Electrolyte on Chloroborylation Reaction

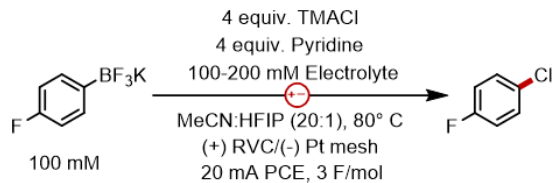

| Entry | Electrolyte                | % yield Ar-Cl | E <sub>cell</sub> |
|-------|----------------------------|---------------|-------------------|
| 1     | 200 mM LiClO <sub>4</sub>  | >95           | 1.8 V             |
| 2     | 200 mM LiBF <sub>4</sub>   | >95           | 2.2 V             |
| 3     | 200 mM LiPF <sub>6</sub>   | 92            | 2.9 V             |
| 4     | 200 mM LiOTf               | 84            | 2.1 V             |
| 5     | 100 mM TBAClO <sub>4</sub> | 23            | 3.6 V             |
| 6     | 100 mM TBABF <sub>4</sub>  | 18            | 3.7 V             |
| 7     | 100 mM TBAPF <sub>6</sub>  | 7             | 4.0 V             |
| 8     | 200 mM KPF <sub>6</sub>    | 20            | 3.9 V             |

**Table S3:** Reactions with a variety of different supporting electrolytes.

All reactions were carried out on a 0.30 mmol scale following General Procedure A unless otherwise noted. Reactions were analyzed with <sup>19</sup>F-NMR using 1,3,5-trifluorobenzene as internal standard. HFIP= 1,1,1,3,3,3-hexafluoroisopropanol, PCE= Pulsed current electrolysis (60s on 30 s off), TMACl= tetramethylammonium chloride, RVC= Reticulated Vitreous Carbon.

## Reaction Development for electron rich arenes

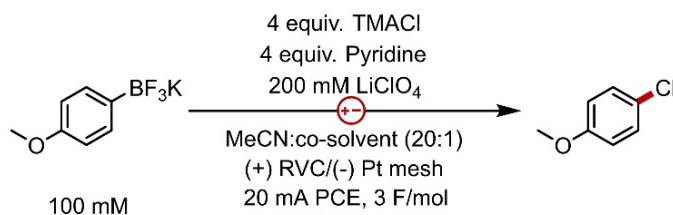

| Entry | Additive/Co-solvent    | % yield Ar-Cl | E <sub>cell</sub> |
|-------|------------------------|---------------|-------------------|
| 1     | HFIP, 25° C            | 25            | 5.5 V             |
| 2     | HFIP, 60° C            | 37            | 3.8 V             |
| 3     | HFIP, 80° C            | 62            | 3.6 V             |
| 4     | HFIP, 3.5 V PPE, 80° C | 67            | *3.5 V            |
| 5     | TFE, 80° C             | 83            | 2.8 V             |
| 6     | TFE, 2.5 V PPE, 80° C  | 90            | *2.5 V            |
| 7     | TFE, 2.5 V PPE, 40° C  | 76            | *2.5 V            |

**Table S4:** Varying co-solvent, temperature, and electrolysis conditions for the optimization of electron rich arenes. Asterisk (\*) indicates Pulsed Potential Electrolysis (PPE) at the indicated cell potential.

All reactions were carried out on a 0.30 mmol scale following General Procedure A unless otherwise noted. Reactions were analyzed with Gas Column Chromatography using dodecane as internal standard. PCE= Pulsed current electrolysis (60s on 30 s off), TMACl= tetramethylammonium chloride, RVC= Reticulated Vitreous Carbon. HFIP= 1,1,1,3,3,3-hexafluoroisopropanol, TFE= 2,2,2-trifluoroethanol, PPE= Pulsed Potential Electrolysis (60 s on 30 s off)



## Reaction Development for electron poor arenes

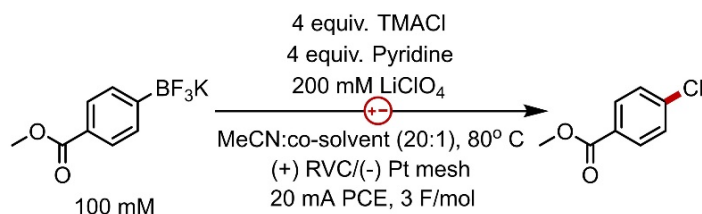

| Entry | Additive/Co-solvent                  | % yield Ar-Cl | E <sub>cell</sub> |
|-------|--------------------------------------|---------------|-------------------|
| 1     | HFIP                                 | 45            | 2.0 V             |
| 2     | TFE                                  | 33            | 2.1 V             |
| 3     | HFIP, 2.5 V PPE                      | 45            | *2.5 V            |
| 4     | H <sub>2</sub> O                     | 4             | 2.5 V             |
| 5     | PyHCl                                | 36            | 2.3 V             |
| 6     | AcOH                                 | 68            | 2.5 V             |
| 7     | 20:1:1 MeCN:AcOH:TFE                 | 52            | 2.0 V             |
| 8     | 20:1:1 MeCN:AcOH:TFE, 1 eq. pyridine | 84            | 2.2 V             |

**Table S5:** Varying co-solvent, protic additives, pyridine concentration, and electrolysis conditions for the optimization of electron poor arenes. Asterisk (\*) indicates Pulsed Potential Electrolysis (PPE) at the indicated potential.

All reactions were carried out on a 0.30 mmol scale following General Procedure A unless otherwise noted. Reactions were analyzed with Gas Column Chromatography using dodecane as internal standard. PCE= Pulsed current electrolysis (60s on 30 s off), TMACl= tetramethylammonium chloride, RVC= Reticulated Vitreous Carbon. HFIP= 1,1,1,3,3,3-hexafluoroisopropanol, TFE= 2,2,2-trifluoroethanol, AcOH= acetic acid, PyHCl= pyridinium hydrochloride, PPE= Pulsed Potential Electrolysis (60 s on 30 s off)

## Reaction Scope utilizing LiCl and 25 °C

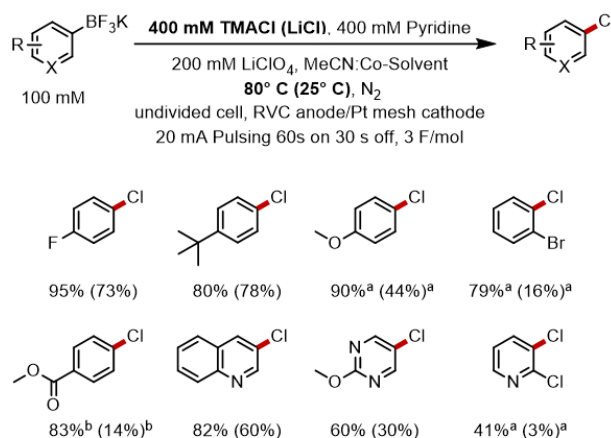

**Chart S1:** Chlorinated yields of aryl trifluoroborate salts. Yields were determined by GC analysis using dodecane as an internal standard. **Yields in parentheses are from reactions that utilized lithium chloride instead of TMACl and 25 °C instead of 80 °C.** Reactions were conducted utilizing General Procedure A (see below) with the above-mentioned changes when indicated. (a) Reactions were conducted utilizing General Procedure B (see below) with the above-mentioned changes when indicated. (b) Reactions were conducted utilizing General Procedure C (see below) with the above-mentioned changes when indicated.

## Low yielding substrate scope

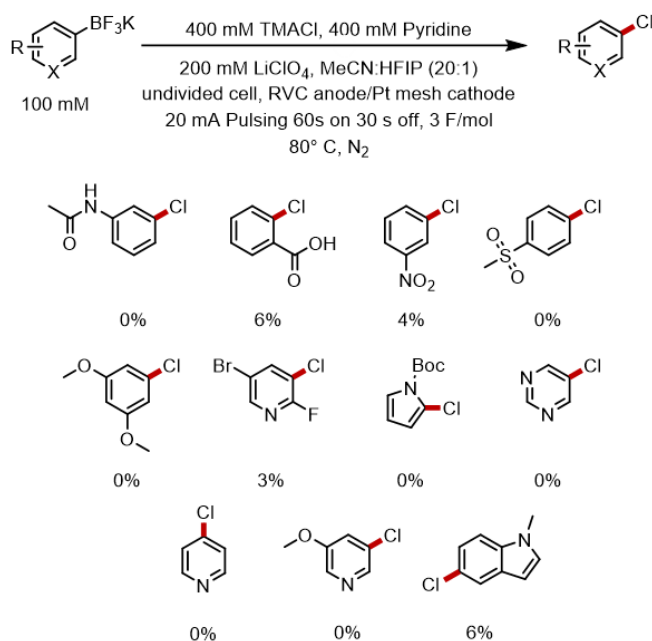

**Chart S2:** Chlorinated yields for aryl-trifluoroborate substrates that do not perform under the methodology.

All reactions were carried out on a 0.30 mmol scale following General Procedure A. Yields were determined by Gas Column Chromatography analysis using dodecane as an internal standard.

## Electrochemical Bromination Conditions for some Aryl-BF<sub>3</sub>K Substrates

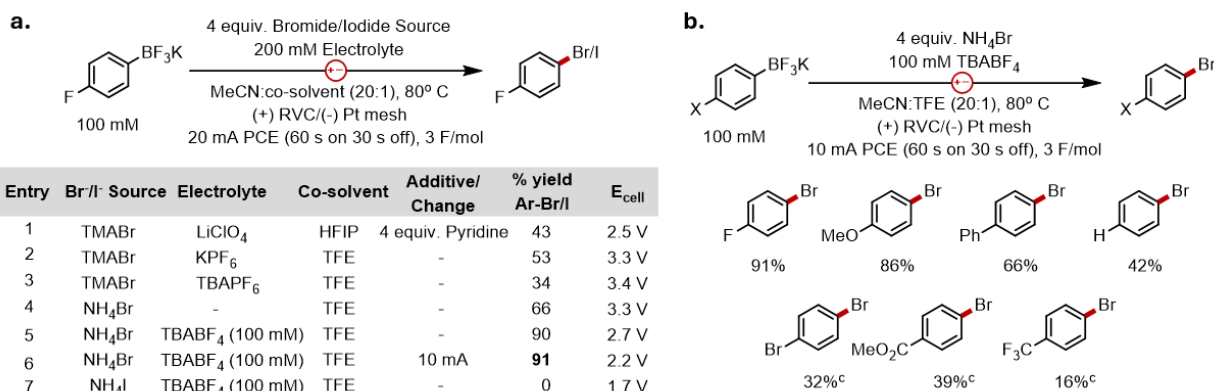

**Table S6:** (a) Electrochemical bromination optimization of potassium 4-fluorophenyltrifluoroborate. (b) Scope of bromination reaction. (c) Reactions performed without TBABF<sub>4</sub> and with AcOH as co-solvent instead of TFE.

All reactions were carried out on a 0.30 mmol scale following General Procedure D unless otherwise noted. Yields were determined by Gas Column Chromatography analysis using dodecane as an internal standard.

## Current Profile With and Without Pulsing

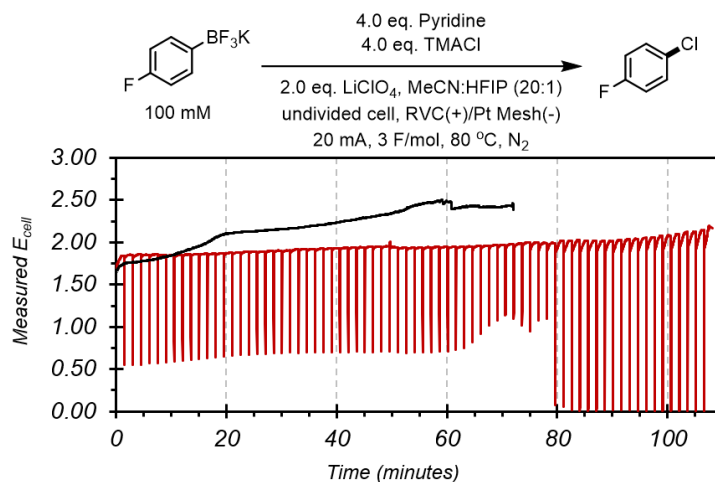

**Figure S2:** Voltage profile of the chlorodeborylation of potassium 4-fluorophenyltrifluoroborate under 20 mA constant current electrolysis (black trace) or under 20 mA pulsing current electrolysis electrolyzing for 60 seconds with a 30 second rest period (red trace). Electrolysis was performed until 3 F/mol capacity was achieved.

All reactions were carried out on a 0.30 mmol scale following General Procedure A unless otherwise noted. Reaction conditions: 100 mM potassium 4-fluorophenyltrifluoroborate, 200 mM LiClO<sub>4</sub>, 400 mM Pyridine, 400 mM tetramethylammonium chloride, MeCN-d<sub>3</sub>:HFIP (20:1), Pt Mesh cathode, RVC anode, 80° C, 20mA (CCE [Black Trace] or pulsing 60 s on 30 s off [Red Trace]), 3 F/mol.

## Divided Cell Reaction

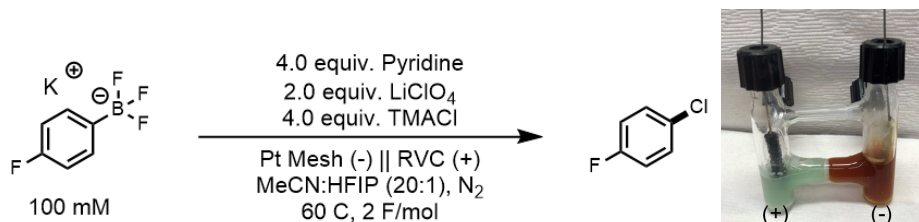

**Figure S3:** Divided cell reaction for the electrochemical chlorodeborylation of potassium 4-fluorophenyltrifluoroborate. Picture shows divided cell post electrolysis.

This reaction was performed following General Procedure A on a 0.40 mmol scale in a divided cell (glass frit partition).

**Anodic Cell:** Potassium 4-fluorophenyltrifluoroborate (81 mg, 0.40 mmol, 1.0 equiv.), pyridine (127 mg, 1.60 mmol, 4.0 equiv.), lithium perchlorate (85 mg, 0.80 mmol, 2.0 equiv.), tetramethylammonium chloride (176 mg, 1.60 mmol, 4.0 equiv.), acetonitrile (4 mL), 1,3,5-trifluorobenzene internal standard, and HFIP (0.20 mL).

**Cathodic Cell:** Potassium 4-fluorophenyltrifluoroborate (81 mg, 0.40 mmol, 1.0 equiv.), pyridine (127 mg, 1.60 mmol, 4.0 equiv.), lithium perchlorate (85 mg, 0.80 mmol, 2.0 equiv.), tetramethylammonium chloride (176 mg, 1.60 mmol, 4.0 equiv.), acetonitrile (4 mL), 1,3,5-trifluorobenzene internal standard, and HFIP (0.20 mL).

The reaction cell was set up in a nitrogen filled glove box. Once removed, it was placed in an oil bath at 60 °C and allowed to stir for 5 minutes. 30 V was applied until 2 F/mol capacity was achieved. Following electrolysis, an aliquot was removed from each chamber and analyzed via <sup>19</sup>F NMR.

Yield of 1-chloro-4-fluorobenzene: Anodic Cell: 91%, Cathodic Cell 7% (due to crossover).

## Time-point study of aryl chloride yield vs capacity

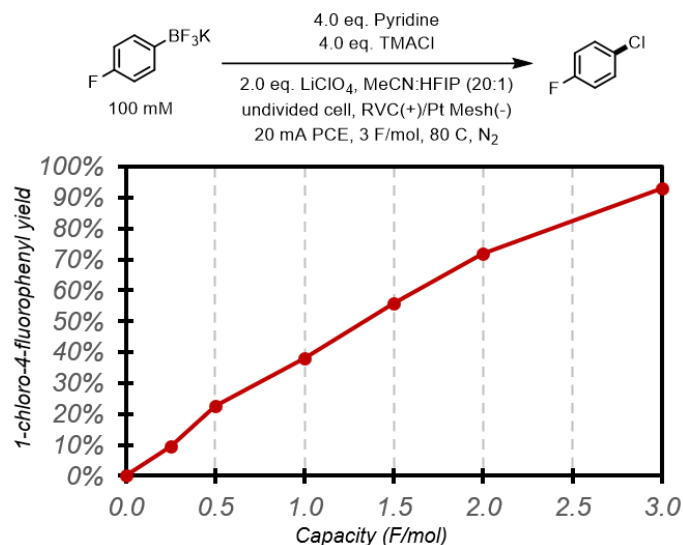

**Figure S4:** Aryl chloride product yield vs capacity (e<sup>-</sup> equiv.).

This reaction was performed following General Procedure A using 1,3,5-trifluorobenzene as <sup>19</sup>F NMR internal standard. Aliquots were removed periodically (0 F/mol, 0.5 F/mol, 1.0 F/mol, 1.5 F/mol, 2.0 F/mol, and 3.0 F/mol) and analyzed by <sup>19</sup>F NMR.

## NMR Analysis of Cathode Fouling Layer

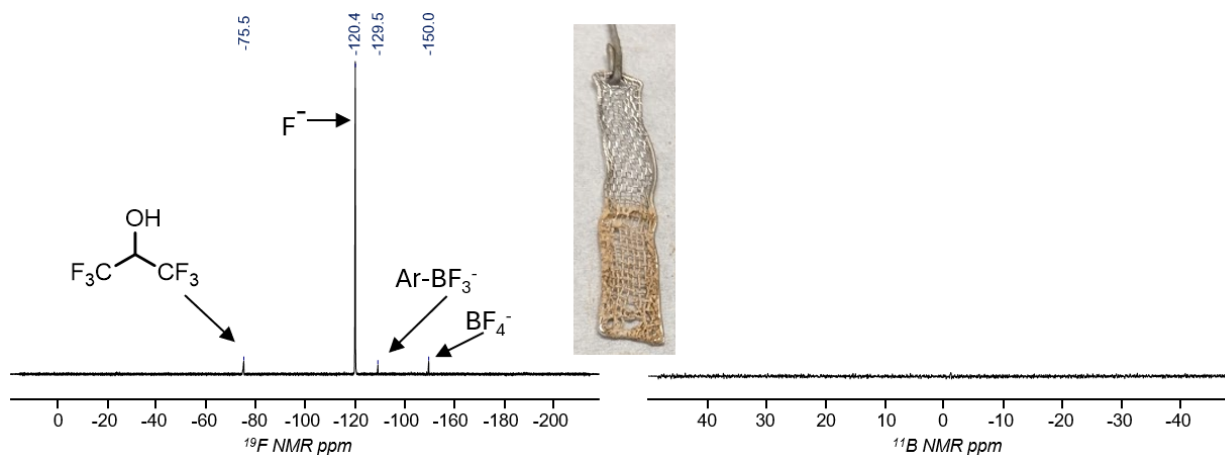

**Figure S5:** <sup>19</sup>F and <sup>11</sup>B NMR analysis of the material found on the cathode post electrolysis in reactions excluding pyridine. NMR analysis performed in H<sub>2</sub>O solvent.

## Cyclic Voltammograms found in Manuscript Figure 2

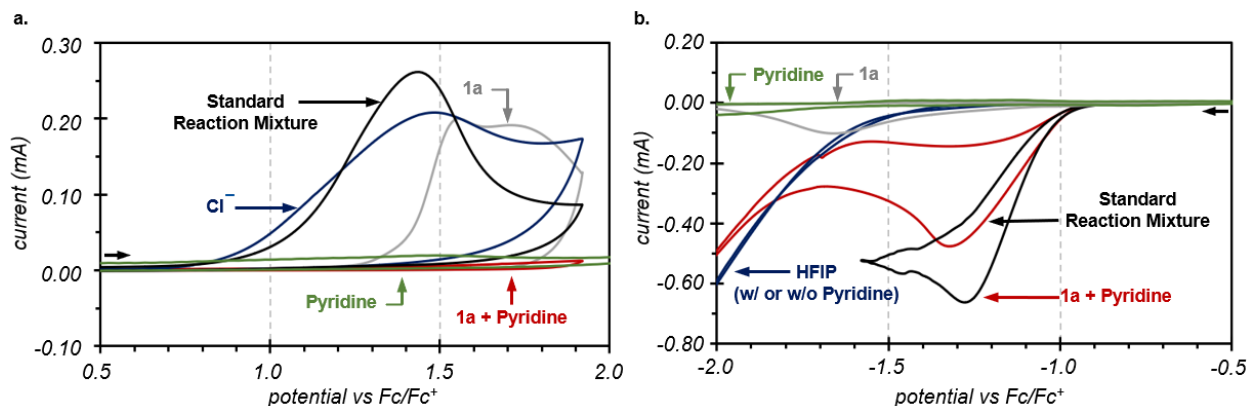

**Figure S6:** (a) CVs of standard reaction conditions (black trace), TMACl (blue trace), **1a** (grey trace), **1a** and pyridine (red trace), pyridine (green trace). (b) CVs of standard reaction conditions (black trace), HFIP and pyridine (blue trace), **1a** (grey trace), **1a** and pyridine (red trace), pyridine (green trace). CVs are reported in IUPAC convention.

**CV conditions:** 25 °C, acetonitrile solvent sparged with N<sub>2</sub>, 200 mM lithium perchlorate, Glassy Carbon WE ( $\phi$  3.0 mm) [a] -or- Pt disk WE ( $\phi$  1.6 mm) [b], Pt wire CE and Ag/Ag<sup>+</sup> quasi reference electrode. The electrochemical potentials are normalized to an internal ferrocene reference.

**a.** Scan starts at 0.0 V vs Fc/Fc<sup>+</sup> in the anodic direction and reverses at 1.9 V vs Fc/Fc<sup>+</sup>.

**Black trace:** 50 mM 4-fluorophenyl-BF<sub>3</sub>K, 200 mM pyridine, 200 mM tetramethylammonium chloride, 250 mM HFIP.

**Blue trace:** 200 mM tetramethylammonium chloride

**Grey trace:** 50 mM 4-fluorophenyl-BF<sub>3</sub>K.

**Red trace:** 50 mM 4-fluorophenyl-BF<sub>3</sub>K, 200 mM pyridine.

**Green trace:** 100 mM pyridine

**b.** Scan starts at 0.0 V vs Fc/Fc<sup>+</sup> in the cathodic direction and reverses at -2.0 V vs Fc/Fc<sup>+</sup> (red trace reverses at -1.6 V vs Fc/Fc<sup>+</sup>).

**Black trace:** 50 mM 4-fluorophenyl-BF<sub>3</sub>K, 200 mM pyridine, 200 mM tetramethylammonium chloride, 250 mM HFIP.

**Blue trace:** 250 mM HFIP

**Grey trace:** 50 mM 4-fluorophenyl-BF<sub>3</sub>K.

**Red trace:** 50 mM 4-fluorophenyl-BF<sub>3</sub>K, 200 mM pyridine.

**Green trace:** 100 mM pyridine

Cyclic Voltammograms found in Manuscript Figure 3b

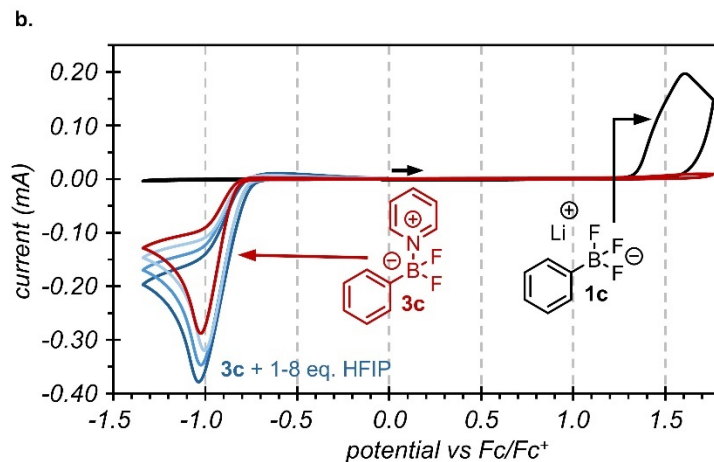

**Figure S7:** CVs of **1c** (black trace), **1c** and pyridine (red trace), **1c** and pyridine and HFIP (increasing concentrations)(blue traces). CVs are reported in IUPAC convention.

**CV conditions:** 25 °C, acetonitrile solvent sparged with N<sub>2</sub>, 100 mM supporting electrolyte (see below for more detail), Pt disk WE ( $\phi$  1.6 mm), Pt wire CE and Ag/Ag<sup>+</sup> quasi reference electrode. The electrochemical potentials are normalized to an internal ferrocene reference.

**Red trace:** Scan starts at 0.0 V vs Fc/Fc<sup>+</sup> in the anodic direction and reverses at 1.8 V vs Fc/Fc<sup>+</sup>. 100 mM TBAClO<sub>4</sub> supporting electrolyte, 25 mM potassium phenyltrifluoroborate, 50 mM Pyridine, 50 mM LiClO<sub>4</sub>.

**Blue traces:** Scan starts at 0.0 V vs Fc/Fc<sup>+</sup> in the anodic direction and reverses at 1.8 V vs Fc/Fc<sup>+</sup>. 100 mM TBAClO<sub>4</sub> supporting electrolyte, 25 mM potassium phenyltrifluoroborate, 50 mM Pyridine, 50 mM LiClO<sub>4</sub>, and 1,1,1,3,3,3-hexafluoroisopropanol (25 mM [light blue], 50 mM [blue], 200 mM [dark blue]).

**Black trace:** Scan starts at 0.0 V vs Fc/Fc<sup>+</sup> in the anodic direction and reverses at 1.8 V vs Fc/Fc<sup>+</sup>. 100 mM TBAClO<sub>4</sub> supporting electrolyte, 25 mM potassium 4-fluorophenyltrifluoroborate.

## Cyclic Voltammograms of Aryl-BF<sub>3</sub> + pyridine complexes

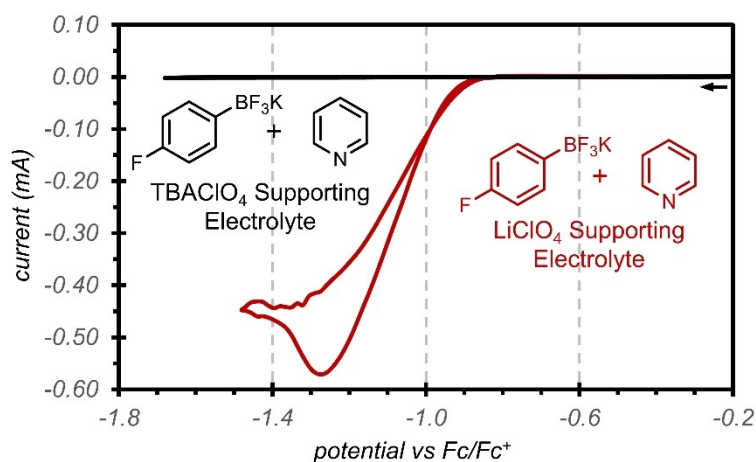

**Figure S8:** Cyclic voltammograms (IUPAC convention) of potassium 4-fluorophenyltrifluoroborate and pyridine in the presence of a tetrabutylammonium electrolyte (black trace) or a lithium electrolyte (red trace).

**CV conditions:** 25 °C, acetonitrile solvent sparged with N<sub>2</sub>, 200 mM supporting electrolyte (see below for more detail), Pt disk WE ( $\phi$  1.6 mm), Pt wire CE and Ag/Ag<sup>+</sup> quasi reference electrode. The electrochemical potentials are normalized to an internal ferrocene reference.

**Black trace:** Scan starts at 0.0 V vs Fc/Fc<sup>+</sup> in the cathodic direction and reverses at -1.7 V vs Fc/Fc<sup>+</sup>. 200 mM TBAClO<sub>4</sub> supporting electrolyte, 25 mM potassium 4-fluorophenyltrifluoroborate, 100 mM Pyridine.

**Red trace:** Scan starts at 0.0 V vs Fc/Fc<sup>+</sup> in the cathodic direction and reverses at -1.5 V vs Fc/Fc<sup>+</sup>. 100 mM LiClO<sub>4</sub> supporting electrolyte, 25 mM potassium 4-fluorophenyltrifluoroborate, 100 mM Pyridine.



## Cyclic Voltammograms of very electron rich and very electron poor aryl trifluoroborate salts

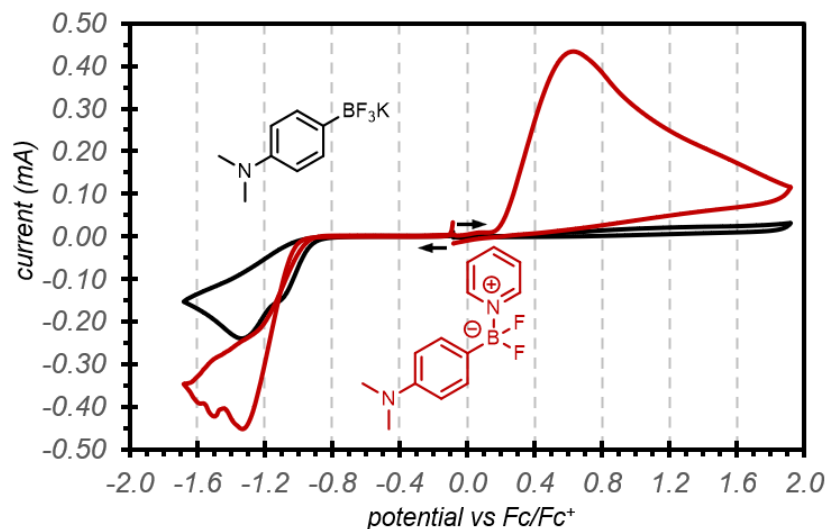

**Figure S9:** Cyclic voltammograms of potassium 4-dimethylaminophenyl trifluoroborate salt without pyridine (black trace) and with pyridine (red trace).

**CV conditions:** 25 °C, acetonitrile solvent sparged with N<sub>2</sub>, 200 mM lithium perchlorate supporting electrolyte, Pt disk WE ( $\phi$  1.6 mm) or GC WE ( $\phi$  3.0 mm), Pt wire CE and Ag/Ag<sup>+</sup> quasi reference electrode. The electrochemical potentials are normalized to an internal ferrocene reference.

**Black trace (cathodic scan):** Pt WE, Scan starts at 0.0 V vs Fc/Fc<sup>+</sup> in the cathodic direction and reverses at -1.6 V vs Fc/Fc<sup>+</sup>. 25 mM potassium 4-dimethylaminophenyltrifluoroborate.

**Black trace (anodic scan):** GC WE, Scan starts at 0.0 V vs Fc/Fc<sup>+</sup> in the anodic direction and reverses at 1.9 V vs Fc/Fc<sup>+</sup>. 25 mM potassium 4-dimethylaminophenyltrifluoroborate.

**Red trace (cathodic scan):** Pt WE, Scan starts at 0.0 V vs Fc/Fc<sup>+</sup> in the cathodic direction and reverses at -1.6 V vs Fc/Fc<sup>+</sup>. 25 mM potassium 4-dimethylaminophenyltrifluoroborate, 50 mM pyridine

**Red trace (anodic scan):** GC WE, Scan starts at 0.0 V vs Fc/Fc<sup>+</sup> in the anodic direction and reverses at 1.9 V vs Fc/Fc<sup>+</sup>. 25 mM potassium 4-dimethylaminophenyltrifluoroborate, 50 mM pyridine.

## NMR Analysis of Aryl-BF<sub>2</sub>-Py

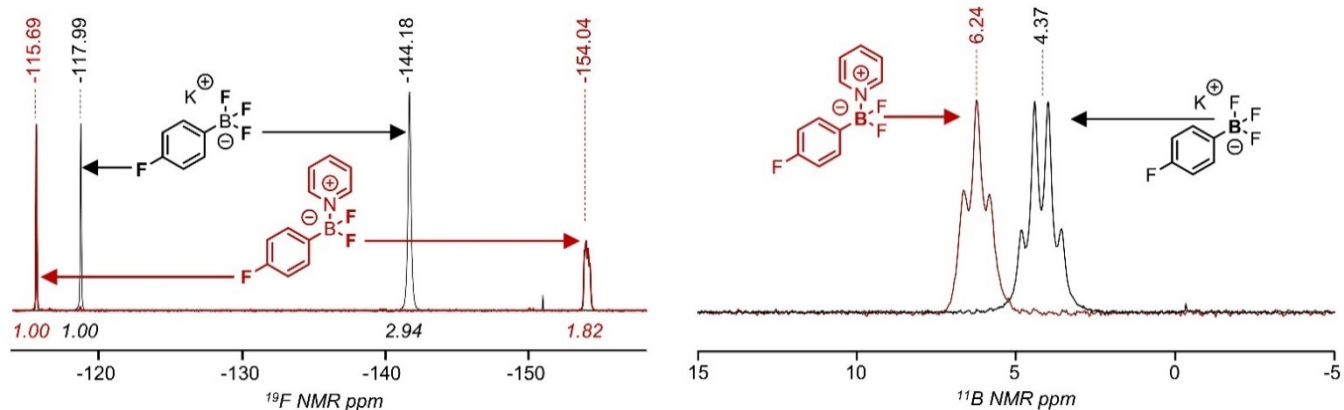

**Figure S10:** <sup>19</sup>F-NMR and <sup>11</sup>B-NMR of potassium 4-fluorophenyltrifluoroborate (black spectrum) and 4-fluorophenyltrifluoroborate, pyridine, and lithium perchlorate (red spectrum) in MeCN.

**Black Spectrum:** 100 mM potassium 4-fluorophenyltrifluoroborate in acetonitrile

**Red Spectrum:** 100 mM potassium 4-fluorophenyltrifluoroborate, 400 mM pyridine, 400 mM LiClO<sub>4</sub> in acetonitrile

<sup>19</sup>F-NMR- Chemical shifts are referenced vs 1,3,5-trifluorobenzene which is normalized to -108.00 ppm

<sup>11</sup>B-NMR- Chemical Shifts are referenced vs sodium tetraphenylborate which is normalized to -5.74 ppm

## <sup>1</sup>H-NMR Analysis of HER Post-Electrolysis

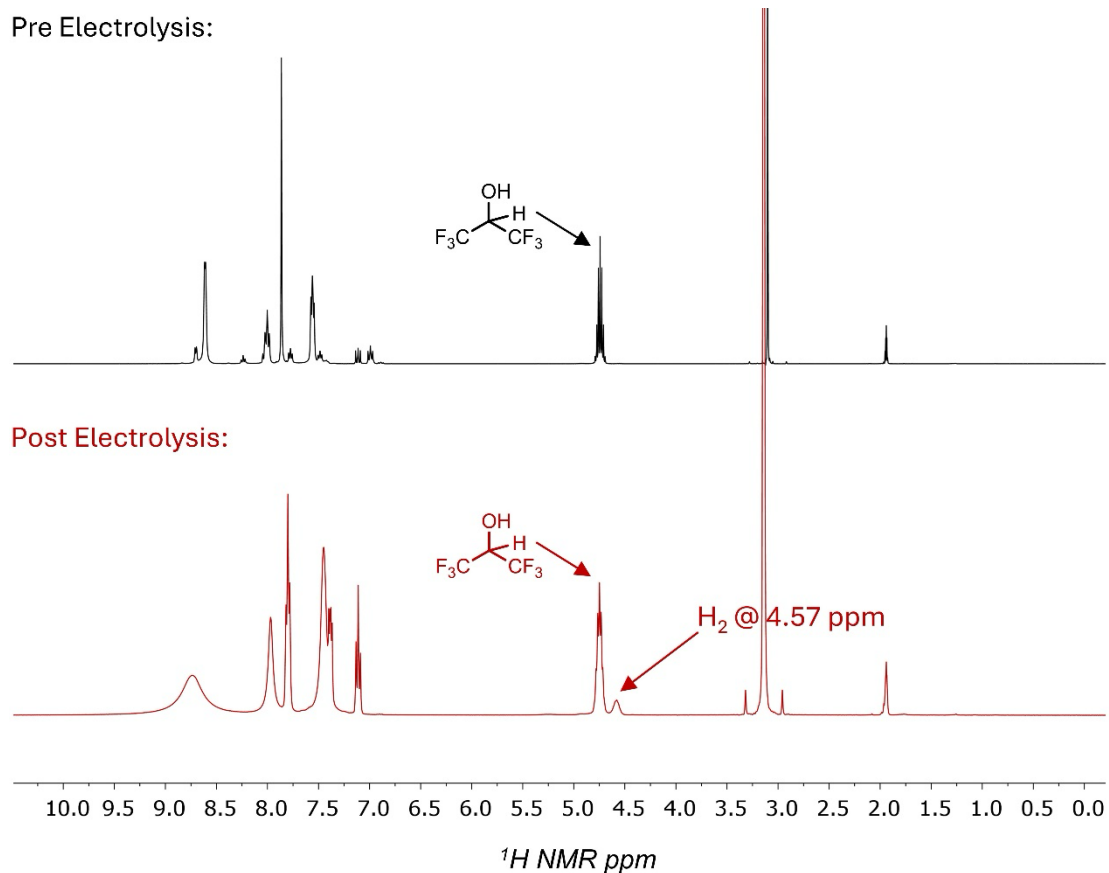

**Figure S11:** <sup>1</sup>H-NMR of a reaction with potassium 4-fluorophenyltrifluoroborate following General Procedure A pre-electrolysis (black spectrum) and post-electrolysis (red spectrum).

Reaction conditions: 100 mM potassium 4-fluorophenyltrifluoroborate, 200 mM LiClO<sub>4</sub>, 400 mM Pyridine, 400 mM tetramethylammonium chloride, MeCN-d<sub>3</sub>:HFIP (20:1), Pt Mesh cathode, RVC anode, 80° C, 20mA pulsing 60 s on 30 s off, 3 F/mol. H<sub>2</sub> observed in <sup>1</sup>H-NMR at 4.57 ppm post electrolysis.<sup>2</sup>

## $^2\text{H}$ -NMR Analysis of Deuterated Co-solvent Post-Electrolysis

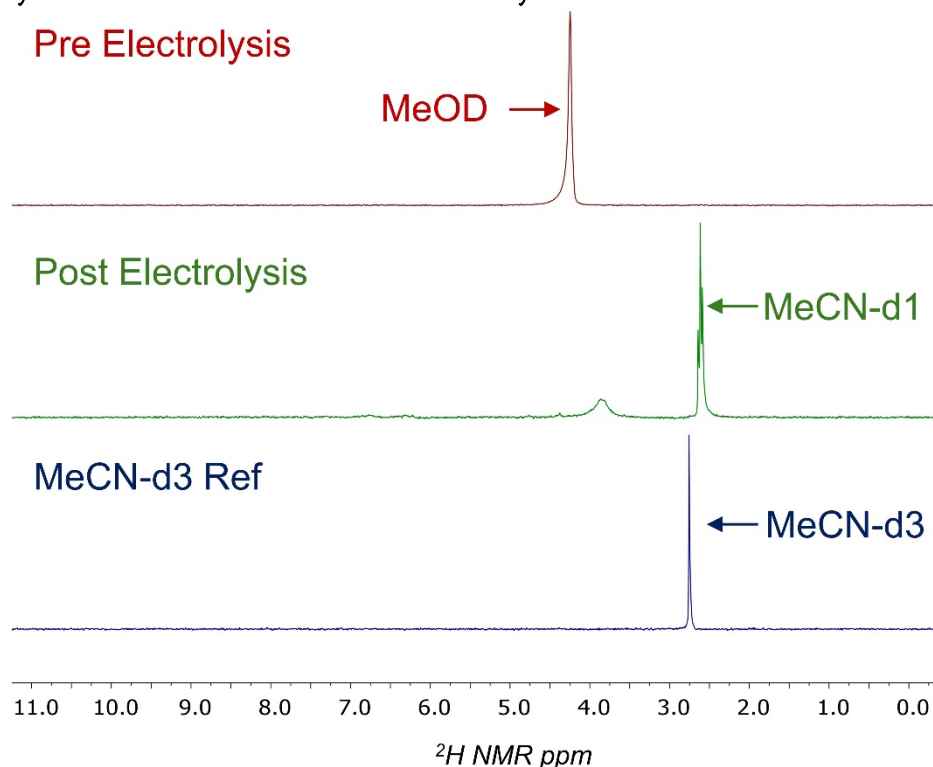

**Figure S12:**  $^2\text{H}$ -NMR of a reaction with potassium 4-fluorophenyltrifluoroborate following General Procedure A pre-electrolysis (red spectrum) and post-electrolysis (green spectrum).

Reaction conditions: 100 mM potassium 4-fluorophenyltrifluoroborate, 200 mM  $\text{LiClO}_4$ , 400 mM Pyridine, 400 mM tetramethylammonium chloride, MeCN:MeOD (20:1), Pt Mesh cathode, RVC anode, 80° C, 20mA pulsing 60 s on 30 s off, 3 F/mol. The reaction was analyzed by  $^2\text{H}$  NMR spectroscopy before and after electrolysis. Post-electrolysis (Green Spectrum), the MeOD resonance has diminished, and a new multiplet resonance appears around 2.6 ppm. We attribute the multiplet to a mixture of deuteria on MeCN. A true sample of MeCN-d<sub>3</sub> (Blue Spectrum) shows the methyl deuterium resonance to be around 2.7 ppm. None of these spectra are normalized to a known chemical shift.

## NMR analysis and CV Analysis of Aryl-Boronic acid-amine Lewis Acid-Base Adduct

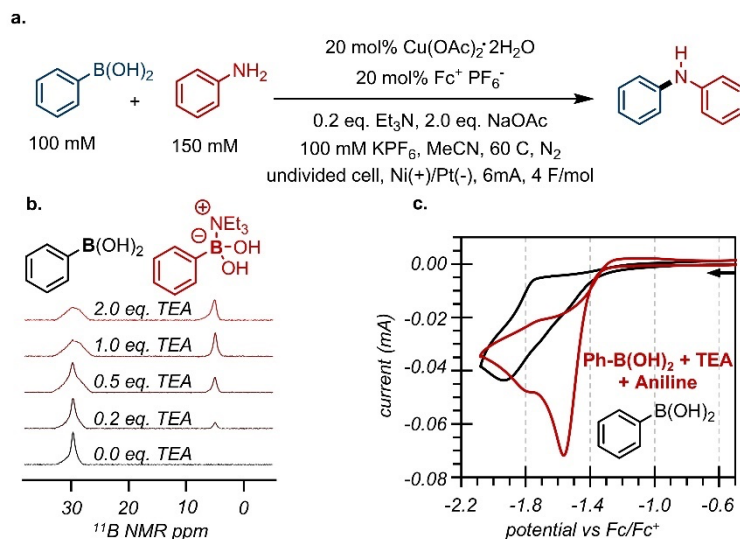

**Figure S13:** (a) Electrochemical Chan-Lam reaction scheme. (b)  $^{11}\text{B}$ -NMR analysis of phenylboronic acid with increasing amounts of triethylamine (c) CV analysis (IUPAC convention) of the Lewis acid-base interaction of phenylboronic acid and amines.

- (a) Reaction scheme for the electrochemical Chan-Lam coupling reaction.<sup>3</sup>
- (b) Five 4 mL vials were charged with phenylboronic acid (2 mg, 0.02 mmol) each. A stock solution of triethylamine (15 mg, 0.15 mmol) in acetonitrile (2.8 mL, 53 mM) was added accordingly: Vial 1. 0.00 mL (0.0 eq.), Vial 2. 0.07 mL (0.2 eq.), Vial 3. 0.15 mL (0.5 eq.), Vial 4. 0.35 mL (1.0 eq.), and Vial 5. 0.7 mL (2.0 eq.). Acetonitrile was added to each vial until the total volume reached 0.7 mL. The solutions were then transferred to NMR tubes and analyzed via  $^{11}\text{B}$ -NMR with  $\text{NaB}(\text{Ph})_4$  as internal standard. Increasing concentrations of triethylamine shows a new peak growing at 4.9 ppm accompanied by the disappearing of the boronic acid peak at 29.7 ppm.
- (c) **CV conditions:** 25 °C, acetonitrile solvent sparged with  $\text{N}_2$ , 100 mM  $\text{KPF}_6$  supporting electrolyte, Pt disk WE ( $\phi$  1.6 mm), Pt wire CE and  $\text{Ag}/\text{Ag}^+$  quasi reference electrode. The electrochemical potentials are normalized to an internal ferrocene reference.  
**Black trace:** 25 mM phenylboronic acid.  
**Red trace:** 25 mM phenylboronic acid, 15 mM triethylamine, 15 mM aniline.  
 All scans started at 0.0 V vs  $\text{Fc}/\text{Fc}^+$  and started scanning in the cathodic direction. Scan was reversed at -2.1 V vs  $\text{Fc}/\text{Fc}^+$ .

## Experimental Section

### General Procedure for Aryl-BF<sub>3</sub>K Synthesis

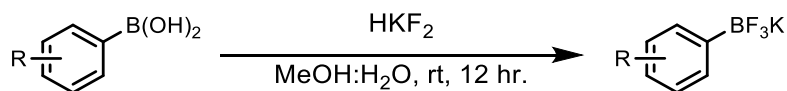

A 40 mL vial was charged with a stir bar, aryl boronic acid (3.73 mmol), HKF<sub>2</sub> (11.2 mmol), methanol (19 mL) and water (1 mL). The reaction was allowed to stir overnight at room temperature. The solvent was removed via rotary evaporation and the resulting solid was dissolved in 150 mL of boiling acetone. The boiling solution was filtered over a pad of diatomaceous earth, and the filtrate was concentrated to the cloud point via rotary evaporation. The solution was placed in the freezer to crystallize overnight. The resulting crystals were filtered and washed with diethyl ether to afford the target aryl trifluoroborate potassium salt as a white solid.

### General Procedure A for Electrochemical Chloro-deborylation

In a nitrogen filled glovebox, aryl-BF<sub>3</sub>K (0.30 mmol) was added to a 10 ml reaction vial along with a stir bar, pyridine (95 mg, 1.2 mmol, 4.0 equiv.), and acetonitrile (2.8 mL). The solution was allowed to stir for 1 minute and then lithium perchlorate (64 mg, 0.60 mmol, 2.0 equiv.) was added along with tetramethylammonium chloride (134 mg, 1.20 mmol, 4.00 equiv.). A platinum mesh cathode and RVC anode are placed in the reaction chamber, pierced through the septa, and sealed with a cap. The reaction was removed from the glove box and 1,1,1,2,2,2-hexafluoroisopropanol (HFIP) (0.15 mL, 5% /v) was added via syringe through the septa. The reaction vial was heated to 80 °C in an aluminum block and allowed to stir for 10 minutes to aid in the dissolution of the salts. Then, a 20 mA current was passed for 60 seconds with a rest period of 30 seconds in a pulsing fashion until 24.1 mAh (3 F/mol) capacity was achieved.

**Safety Note:** The electrochemical chlorodeborylation reactions are performed at 80 °C using acetonitrile (boiling point 82 °C) as solvent in a sealed reaction vessel. Heating solvents close to or past their boiling point in a sealed vessel poses a risk of pressure build up and potential explosion.

Following electrolysis, the reaction mixture was transferred to a separatory funnel and diluted with 150 mL of water. The solution was extracted with diethyl ether or pentane (3 x 25 ml), and the organic layers were combined and washed with 2 M HCl (only performed on substrates lacking acid sensitive functional groups) followed by a saturated brine solution (100 mL). The organic layer was collected and dried over anhydrous sodium sulfate. The organic solvents were removed via rotary evaporation and purified via flash column chromatography.

### General Procedure B for Electrochemical Chloro-deborylation

In a nitrogen filled glovebox, aryl-BF<sub>3</sub>K (0.30 mmol) was added to a 10 ml reaction vial along with a stir bar, pyridine (95 mg, 1.2 mmol, 4.0 equiv.), and acetonitrile (2.8 mL). The solution was allowed to stir for 1 minute and then lithium perchlorate (64 mg, 0.60 mmol, 2.0 equiv.) was added along with tetramethylammonium chloride (134 mg, 1.20 mmol, 4.00 equiv.). A platinum mesh cathode and RVC anode are placed in the reaction chamber, pierced through the septa, and sealed with a cap. The reaction was removed from the glove box and 1,1,1-trifluoroethanol (TFE) (0.15 mL, 5% /v) was added via syringe through the septa. The reaction vial was heated to 80 °C in an aluminum block and allowed to stir for 10 minutes to aid in the dissolution of the salts. Then, a 2.5 V of cell potential was held for 60 seconds with a rest period of 30 seconds in a pulsing fashion until 24.1 mAh (3F/mol) capacity was achieved.

**Safety Note:** The electrochemical chlorodeborylation reactions are performed at 80 °C using acetonitrile (boiling point 82 °C) as solvent in a sealed reaction vessel. Heating solvents close to or past their boiling point in a sealed vessel poses a risk of pressure build up and potential explosion.

Following electrolysis, the reaction mixture was transferred to a separatory funnel and diluted with 150 mL of water. The solution was extracted with diethyl ether or pentane (3 x 25 ml) and the organic layers were combined and washed with 2 M HCl (only performed on substrates lacking acid sensitive functional groups) followed by a saturated brine solution (100 mL). The organic layer was collected and dried over anhydrous sodium sulfate. The organic solvents were removed via rotary evaporation and purified via flash column chromatography.

### General Procedure C for Electrochemical Chloro-deborylation

In a nitrogen filled glovebox, aryl-BF<sub>3</sub>K (0.30 mmol) was added to a 10 ml reaction vial along with a stir bar, pyridine (24 mg, 0.30 mmol, 1.0 equiv.), and acetonitrile (2.8 mL). The solution was allowed to stir for 1 minute and then lithium perchlorate (64 mg, 0.60 mmol, 2.0 equiv.) was added along with tetramethylammonium chloride (134 mg, 1.20 mmol, 4.00 equiv.). A platinum mesh cathode and RVC anode are placed in the reaction chamber, pierced through the septa, and sealed with a cap. The reaction was removed from the glove box and 1,1,1-trifluoroethanol (TFE) (0.15 mL, 5% /v) and acetic acid (0.15 mL, 5% /v) was added via syringe through the septa. The reaction vial was heated to 80 °C in an aluminum block and allowed to stir for 10 minutes to aid in the dissolution of the salts. Then, a 20 mA current was passed for 60 seconds with a rest period of 30 seconds in a pulsing fashion until 24.1 mAh (3F/mol) capacity was achieved.

**Safety Note:** The electrochemical chlorodeborylation reactions are performed at 80 °C using acetonitrile (boiling point 82 °C) as solvent in a sealed reaction vessel. Heating solvents close to or past their boiling point in a sealed vessel poses a risk of pressure build up and potential explosion.

Following electrolysis, the reaction mixture was transferred to a separatory funnel and diluted with 150 mL of water. The solution was extracted with diethyl ether or pentane (3 x 25 ml) and the organic layers were combined and washed with 2 M HCl (only performed on substrates lacking acid sensitive functional groups) followed by a saturated brine solution (100 mL). The organic layer was collected and dried over anhydrous sodium sulfate. The organic solvents were removed via rotary evaporation and purified via flash column chromatography.

### General Procedure D for Electrochemical Bromo-deborylation

In a nitrogen filled glovebox, aryl-BF<sub>3</sub>K (0.30 mmol) was added to a 10 ml reaction vial along with a stir bar, acetonitrile (2.8 mL), tetrabutylammonium tetrafluoroborate (98 mg, 0.30 mmol, 1.0 equiv.), ammonium bromide (118 mg, 1.20 mmol, 4.00 equiv.), and dodecane as internal standard. A platinum mesh cathode and RVC anode are placed in the reaction chamber, pierced through the septa, and sealed with a cap. The reaction was removed from the glove box and 1,1,1-trifluoroethanol (TFE) (0.15 mL, 5% /v) was added via syringe through the septa. The reaction vial was heated to 80 °C in an aluminum block and allowed to stir for 10 minutes to aid in the dissolution of the salts. Then, a 10 mA current was passed for 60 seconds with a rest period of 30 seconds in a pulsing fashion until 24.1 mAh (3F/mol) capacity was achieved.

**Safety Note:** The electrochemical bromodeborylation reactions are performed at 80 °C using acetonitrile (boiling point 82 °C) as solvent in a sealed reaction vessel. Heating solvents close to or past their boiling point in a sealed vessel poses a risk of pressure build up and potential explosion.

Following electrolysis, an aliquot of the solution was transferred to a test tube. The aliquot was diluted with ethyl acetate (2 mL) and washed with a saturated brine solution (2 mL). The organic phase was then transferred to a GC vial and analyzed via Gas Column Chromatography.

### Characterization of Starting Materials

#### potassium trifluoro(4-fluorophenyl)borate (1a)

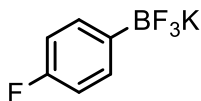

Following General Procedure for Aryl-BF<sub>3</sub>K Synthesis, 4-fluorophenylboronic acid (10.0 g, 71.5 mmol) was used as the aryl-B(OH)<sub>2</sub> reagent and the procedure was scaled accordingly. The title compound was isolated via crystallization in acetone. The title compound was obtained in 98% yield (14.1 g, 69.8 mmol) as a white solid.

Characterization data match those of previously reported literature.<sup>4</sup>

<sup>1</sup>H NMR (400 MHz, (CD<sub>3</sub>)<sub>2</sub>SO) δ 7.39 – 7.29 (m, 2H), 6.91 – 6.84 (m, 2H).

<sup>13</sup>C NMR (101 MHz, (CD<sub>3</sub>)<sub>2</sub>SO) δ 162.2, 159.8, 132.8 (dq, *J* = 6.6, 1.7 Hz), 112.7 (d, *J* = 18.4 Hz).

<sup>19</sup>F NMR (376 MHz, (CD<sub>3</sub>)<sub>2</sub>SO) δ -117.88 – -119.31 (m), -138.39 – -139.33 (m).

<sup>11</sup>B NMR (128 MHz, DMSO-*d*<sub>6</sub>) δ 3.57 (q, *J* = 56.4 Hz).

#### potassium [1,1'-biphenyl]-4-yltrifluoroborate (1b)

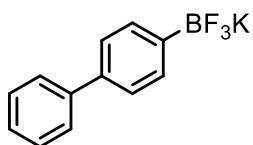

Following General Procedure for Aryl-BF<sub>3</sub>K Synthesis, 4-biphenylboronic acid (3.00 g, 15.2 mmol) was used as the aryl-B(OH)<sub>2</sub> reagent and the procedure was scaled accordingly. The title compound was isolated via crystallization in acetone. The title compound was obtained in 41% yield (1.24 mg, 6.14 mmol) as a white solid.

Characterization data match those of previously reported literature.<sup>5</sup>

<sup>1</sup>H NMR (400 MHz, (CD<sub>3</sub>)<sub>2</sub>SO) δ 7.63 – 7.55 (m, 2H), 7.45 – 7.36 (m, 6H), 7.33 – 7.25 (m, 1H).

<sup>13</sup>C NMR (101 MHz, (CD<sub>3</sub>)<sub>2</sub>SO) δ 141.5, 136.8, 131.9 (q, *J* = 1.7 Hz), 128.7, 126.5, 126.3, 124.6.

<sup>19</sup>F NMR (376 MHz, (CD<sub>3</sub>)<sub>2</sub>SO) δ -139.21.

<sup>11</sup>B NMR (128 MHz, (CD<sub>3</sub>)<sub>2</sub>SO) δ 3.43.

#### potassium trifluoro(phenyl)borate (1c)

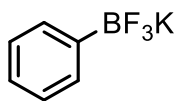

Following General Procedure for Aryl-BF<sub>3</sub>K Synthesis, phenylboronic acid (455 mg, 3.73 mmol) was used as the aryl-B(OH)<sub>2</sub> reagent. The title compound was isolated via crystallization in acetone. The title compound was obtained in 91% yield (624 mg, 3.39 mmol) as a white solid. Characterization data match those of previously reported literature.<sup>6</sup>

<sup>1</sup>H NMR (400 MHz, (CD<sub>3</sub>)<sub>2</sub>SO) δ 7.42 – 7.27 (m, 2H), 7.10 (t, *J* = 7.4 Hz, 2H), 7.06 – 7.00 (m, 1H).

<sup>13</sup>C NMR (101 MHz, (CD<sub>3</sub>)<sub>2</sub>SO) δ 131.3, 126.2, 125.0.

<sup>19</sup>F NMR (376 MHz, (CD<sub>3</sub>)<sub>2</sub>SO) δ -139.08.

<sup>11</sup>B NMR (128 MHz, (CD<sub>3</sub>)<sub>2</sub>SO) δ 3.22.

#### potassium trifluoro(o-tolyl)borate (1d)

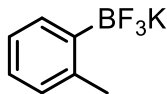

Following General Procedure for Aryl-BF<sub>3</sub>K Synthesis, o-tolylboronic acid (880 mg, 6.47 mmol) was used as the aryl-B(OH)<sub>2</sub> reagent and the procedure was scaled accordingly. The title compound was isolated via crystallization in acetone. The title compound was obtained in 88% yield (1.13 g, 5.72 mmol) as a white solid. Characterization data match those of

previously reported literature.<sup>7</sup>

<sup>1</sup>H NMR (400 MHz, (CD<sub>3</sub>)<sub>2</sub>SO) δ 7.34 (dd, *J* = 7.5, 1.9 Hz, 1H), 6.96 – 6.90 (m, 1H), 6.89 (m, 1H), 6.88 – 6.85 (m, 1H), 2.31 (s, 3H).

<sup>13</sup>C NMR (101 MHz, (CD<sub>3</sub>)<sub>2</sub>SO) δ 140.9, 132.1 (q, *J* = 3.1 Hz), 128.6, 125.5, 123.78, 22.1.

<sup>19</sup>F NMR (376 MHz, (CD<sub>3</sub>)<sub>2</sub>SO) δ -136.44 – -139.02 (m).

<sup>11</sup>B NMR (128 MHz, (CD<sub>3</sub>)<sub>2</sub>SO) δ 3.30.

#### potassium (4-(tert-butyl)phenyl)trifluoroborate (1e)



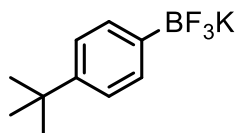

Following General Procedure for Aryl-BF<sub>3</sub>K Synthesis, 4-tertbutylphenylboronic acid (2.67 g, 15.0 mmol) was used as the aryl-B(OH)<sub>2</sub> reagent and the procedure was scaled accordingly. The title compound was isolated via crystallization in acetone. The title compound was obtained in 71% yield (2.55 g, 10.6 mmol) as a white solid.

Characterization data match those of previously reported literature.<sup>8</sup>

<sup>1</sup>H NMR (400 MHz, (CD<sub>3</sub>)<sub>2</sub>SO) δ 7.28 – 7.21 (m, 2H), 7.13 – 7.08 (m, 2H), 1.25 (s, 9H).

<sup>13</sup>C NMR (101 MHz, (CD<sub>3</sub>)<sub>2</sub>SO) δ 146.7, 131.1 (q, *J* = 1.7 Hz), 122.8, 33.9, 31.4.

<sup>19</sup>F NMR (376 MHz, (CD<sub>3</sub>)<sub>2</sub>SO) δ -138.71 (bs).

#### potassium trifluoro(4-methoxyphenyl)borate (1f)

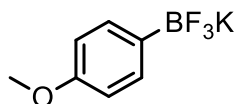

Following General Procedure for Aryl-BF<sub>3</sub>K Synthesis, 4-methoxyphenylboronic acid (1.14 g, 7.50 mmol) was used as the aryl-B(OH)<sub>2</sub> reagent and the procedure was scaled accordingly. The title compound was isolated via crystallization in acetone. The title compound was obtained in 78% yield (1.25 g, 5.84 mmol) as a white solid.

Characterization data match those of previously reported literature.<sup>6</sup>

<sup>1</sup>H NMR (400 MHz, (CD<sub>3</sub>)<sub>2</sub>SO) δ 7.23 (d, *J* = 8.3 Hz, 2H), 6.67 (d, *J* = 7.9 Hz, 2H), 3.68 (s, 3H).

<sup>13</sup>C NMR (101 MHz, (CD<sub>3</sub>)<sub>2</sub>SO) δ 157.2, 132.2 (q, *J* = 1.7 Hz), 111.8, 54.5.

<sup>19</sup>F NMR (376 MHz, (CD<sub>3</sub>)<sub>2</sub>SO) δ -138.21 (bs).

<sup>11</sup>B NMR (128 MHz, DMSO-*d*<sub>6</sub>) δ 3.56 (bs).

#### potassium (4-(dimethylamino)phenyl)trifluoroborate (1g)

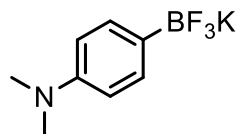

Following General Procedure for Aryl-BF<sub>3</sub>K Synthesis, 4-dimethylaminophenylboronic acid (825 mg, 5.00 mmol) was used as the aryl-B(OH)<sub>2</sub> reagent and the procedure was scaled accordingly. The title compound was isolated via crystallization in acetone. The title compound was obtained in 42% yield (472 mg, 2.08 mmol) as a white solid.

<sup>1</sup>H NMR (400 MHz, CD<sub>3</sub>CN) δ 7.26 (d, *J* = 8.1 Hz, 2H), 6.71 – 6.56 (m, 2H), 2.83 (s, 6H).

<sup>13</sup>C NMR (101 MHz, CD<sub>3</sub>CN) δ 132.7, 112.8, 40.9.

<sup>19</sup>F NMR (376 MHz, CD<sub>3</sub>CN) δ -141.16.

<sup>11</sup>B NMR (128 MHz, CD<sub>3</sub>CN) δ 5.12 – 1.75 (m).

HRMS (ESI-ion trap) (*m/z*): [*M*]<sup>-</sup> for C<sub>8</sub>H<sub>10</sub>BF<sub>3</sub>N<sup>-</sup>: calcd for 188.0864, found 181.0864.

#### potassium trifluoro(mesityl)borate (1h)

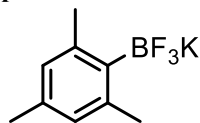

Following General Procedure for Aryl-BF<sub>3</sub>K Synthesis, mesitylboronic acid (670 mg, 4.09 mmol) was used as the aryl-B(OH)<sub>2</sub> reagent and the procedure was scaled accordingly. The title compound was isolated via crystallization in acetone. The title compound was obtained in 82% yield (759 mg, 3.36 mmol) as a white solid. Characterization data match

those of previously reported literature.<sup>9</sup>

<sup>1</sup>H NMR (400 MHz, CD<sub>3</sub>CN) δ 6.60 (s, 2H), 2.32 (s, 6H), 2.15 (s, 3H).

#### potassium (2,4-difluorophenyl)trifluoroborate (1i)

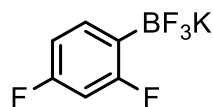

Following General Procedure for Aryl-BF<sub>3</sub>K Synthesis, 2,4-difluorophenylboronic acid (1.70 g, 10.8 mmol) was used as the aryl-B(OH)<sub>2</sub> reagent and the procedure was scaled accordingly. The title compound was isolated via crystallization in acetone. The title compound was obtained in 88% yield (2.07 g, 9.43 mmol) as a white solid.

<sup>1</sup>H NMR (400 MHz, (CD<sub>3</sub>)<sub>2</sub>SO) δ 7.33 (q, *J* = 7.8 Hz, 1H), 6.73 (dtd, *J* = 18.6, 9.6, 9.1, 2.4 Hz, 2H).

<sup>13</sup>C NMR (101 MHz, (CD<sub>3</sub>)<sub>2</sub>SO) δ 165.4 (dd, *J* = 241.8, 10.8 Hz), 161.1 (dd, *J* = 240.8, 12.3 Hz), 135.4 – 134.3 (m), 109.1 (d, *J* = 18.1 Hz), 101.8 (dd, *J* = 30.7, 23.3 Hz).

<sup>19</sup>F NMR (376 MHz, (CD<sub>3</sub>)<sub>2</sub>SO) δ -103.48, -115.85, -137.04.

<sup>11</sup>B NMR (128 MHz, (CD<sub>3</sub>)<sub>2</sub>SO) δ 2.26 (d, *J* = 50.0 Hz).

HRMS (ESI-ion trap) (*m/z*): [*M*]<sup>-</sup> for C<sub>6</sub>H<sub>3</sub>BF<sub>5</sub><sup>-</sup>: calcd for 181.0253, found 181.0254.

**potassium (4-bromophenyl)trifluoroborate (1j)**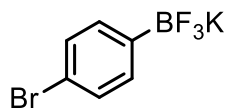

Following General Procedure for Aryl-BF<sub>3</sub>K Synthesis, 4-bromophenylboronic acid (3.01 g, 15.0 mmol) was used as the aryl-B(OH)<sub>2</sub> reagent and the procedure was scaled accordingly. The title compound was isolated via crystallization in acetone. The title compound was obtained in 79% yield (3.10 g, 11.8 mmol) as a white solid.

Characterization data match those of previously reported literature.<sup>10</sup>

<sup>1</sup>H NMR (400 MHz, (CD<sub>3</sub>)<sub>2</sub>SO) δ 7.26 (s, 4H).

<sup>13</sup>C NMR (101 MHz, (CD<sub>3</sub>)<sub>2</sub>SO) δ 133.6 (q, *J* = 1.7 Hz), 129.0, 118.47, 30.7.

<sup>19</sup>F NMR (376 MHz, (CD<sub>3</sub>)<sub>2</sub>SO) δ -134.96 – -143.68 (m).

**potassium (2-bromophenyl)trifluoroborate (1k)**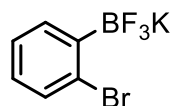

Following General Procedure for Aryl-BF<sub>3</sub>K Synthesis, 2-bromophenylboronic acid (1.74 g, 8.66 mmol) was used as the aryl-B(OH)<sub>2</sub> reagent and the procedure was scaled accordingly.

The title compound was isolated via crystallization in acetone. The title compound was obtained in 63% yield (1.44 g, 5.46 mmol) as a white solid. Characterization data match those

of previously reported literature.<sup>11</sup>

<sup>1</sup>H NMR (400 MHz, (CD<sub>3</sub>)<sub>2</sub>SO) δ 7.43 (dd, *J* = 7.3, 2.0 Hz, 1H), 7.34 – 7.25 (m, 1H), 7.10 (tdd, *J* = 7.2, 1.1, 0.6 Hz, 1H), 6.96 (td, *J* = 7.5, 2.0 Hz, 1H).

<sup>13</sup>C NMR (101 MHz, (CD<sub>3</sub>)<sub>2</sub>SO) δ 134.1 (q, *J* = 2.9 Hz), 131.4, 127.7, 127.4, 125.4.

<sup>19</sup>F NMR (376 MHz, (CD<sub>3</sub>)<sub>2</sub>SO) δ -137.84 – -141.53 (m).

<sup>11</sup>B NMR (128 MHz, (CD<sub>3</sub>)<sub>2</sub>SO) δ 2.35 (d, *J* = 52.3 Hz).

**potassium trifluoro(4-(methoxycarbonyl)phenyl)borate (1l)**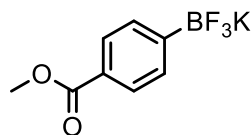

Following General Procedure for Aryl-BF<sub>3</sub>K Synthesis, 4-methoxycarbonylphenylboronic acid (900 mg, 5.00 mmol) was used as the aryl-B(OH)<sub>2</sub> reagent and the procedure was scaled accordingly. The title compound was isolated via crystallization in acetone. The title compound was obtained in 60% yield (732 mg, 3.02 mmol) as a white solid. Characterization data match those of previously

reported literature.<sup>6</sup>

<sup>1</sup>H NMR (400 MHz, (CD<sub>3</sub>)<sub>2</sub>SO) δ 7.73 (dd, *J* = 8.2, 0.8 Hz, 2H), 7.47 (d, *J* = 8.1 Hz, 2H), 3.81 (s, 3H).

<sup>19</sup>F NMR (376 MHz, (CD<sub>3</sub>)<sub>2</sub>SO) δ -139.92.

<sup>11</sup>B NMR (128 MHz, (CD<sub>3</sub>)<sub>2</sub>SO) δ 2.92.

**potassium (4-acetylphenyl)trifluoroborate (1m)**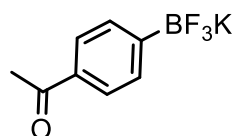

Following General Procedure for Aryl-BF<sub>3</sub>K Synthesis, 4-acetylphenylboronic acid (405 mg, 2.47 mmol) was used as the aryl-B(OH)<sub>2</sub> reagent and the procedure was scaled accordingly. The title compound was isolated via crystallization in acetone. The title compound was obtained in 46% yield (258 mg, 1.14 mmol) as a white solid.

Characterization data match those of previously reported literature.<sup>10</sup>

<sup>1</sup>H NMR (400 MHz, (CD<sub>3</sub>)<sub>2</sub>SO) δ 7.74 – 7.68 (m, 2H), 7.46 (d, *J* = 8.1 Hz, 2H), 2.51 (s, 3H).

<sup>19</sup>F NMR (376 MHz, (CD<sub>3</sub>)<sub>2</sub>SO) δ -139.78.

<sup>11</sup>B NMR (128 MHz, (CD<sub>3</sub>)<sub>2</sub>SO) δ 2.76.

**potassium (4-benzoylphenyl)trifluoroborate (1n)**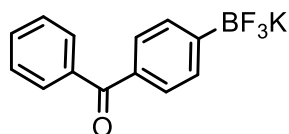

Following General Procedure for Aryl-BF<sub>3</sub>K Synthesis, 4-benzoylphenylboronic acid (1.18 mg, 5.22 mmol) was used as the aryl-B(OH)<sub>2</sub> reagent and the procedure was scaled accordingly. The title compound was isolated via crystallization in acetone. The title compound was obtained in 49% yield (733 mg, 2.54 mmol) as a white solid. Characterization data match those of previously reported literature.<sup>6</sup>

$^1\text{H NMR}$  (400 MHz,  $(\text{CD}_3)_2\text{SO}$ )  $\delta$  7.73 – 7.67 (m, 2H), 7.67 – 7.61 (tt, 1H), 7.58 – 7.53 (m, 2H), 7.52 (d,  $J = 0.7$  Hz, 4H).

$^{13}\text{C NMR}$  (101 MHz,  $(\text{CD}_3)_2\text{SO}$ )  $\delta$  196.4, 138.0, 134.0, 132.0, 131.3, 129.4, 128.3, 128.1.

$^{19}\text{F NMR}$  (376 MHz,  $(\text{CD}_3)_2\text{SO}$ )  $\delta$  -139.85.

$^{11}\text{B NMR}$  (128 MHz,  $(\text{CD}_3)_2\text{SO}$ )  $\delta$  2.84.

#### potassium trifluoro(4-(trifluoromethyl)phenyl)borate (1o)

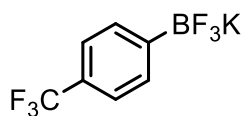

Following General Procedure for Aryl- $\text{BF}_3\text{K}$  Synthesis, 4-trifluoromethylphenylboronic acid (1.42 g, 7.50 mmol) was used as the aryl- $\text{B}(\text{OH})_2$  reagent and the procedure was scaled accordingly. The title compound was isolated via crystallization in acetone. The title compound was obtained in 92% yield (1.73 g, 6.86 mmol) as an off white solid. Characterization data match those of previously reported literature.<sup>6</sup>

$^1\text{H NMR}$  (400 MHz,  $(\text{CD}_3)_2\text{SO}$ )  $\delta$  7.55 (d,  $J = 7.7$  Hz, 2H), 7.43 (d,  $J = 8.0$  Hz, 2H).

$^{19}\text{F NMR}$  (376 MHz,  $(\text{CD}_3)_2\text{SO}$ )  $\delta$  -60.48, -140.01.

#### potassium (4-cyanophenyl)trifluoroborate (1p)

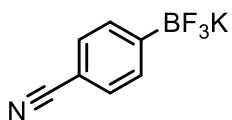

Following General Procedure for Aryl- $\text{BF}_3\text{K}$  Synthesis, 4-cyanophenylboronic acid (667 mg, 4.00 mmol) was used as the aryl- $\text{B}(\text{OH})_2$  reagent and the procedure was scaled accordingly. The title compound was isolated via crystallization in acetone. The title compound was obtained in 73% yield (614 mg, 2.94 mmol) as a white solid. Characterization data match those of previously reported literature.<sup>7</sup>

$^1\text{H NMR}$  (400 MHz,  $(\text{CD}_3)_2\text{SO}$ )  $\delta$  7.57 – 7.43 (m, 4H).

$^{13}\text{C NMR}$  (101 MHz,  $(\text{CD}_3)_2\text{SO}$ )  $\delta$  132.0, 132.0, 130.0, 120.1, 107.7.

$^{19}\text{F NMR}$  (376 MHz,  $(\text{CD}_3)_2\text{SO}$ )  $\delta$  -140.41 (bs).

$^{11}\text{B NMR}$  (128 MHz,  $(\text{CD}_3)_2\text{SO}$ )  $\delta$  4.80 – -0.51 (m).

#### potassium (E)-trifluoro(styryl)borate (1q)

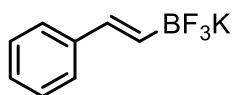

Following General Procedure for Aryl- $\text{BF}_3\text{K}$  Synthesis, (E)-styrylboronic acid (1100 mg, 7.50 mmol) was used as the aryl- $\text{B}(\text{OH})_2$  reagent and the procedure was scaled accordingly. The title compound was isolated via crystallization in acetone. The title compound was obtained in 33% yield (520 mg, 2.48 mmol) as a white solid.

Characterization data match those of previously reported literature.<sup>12</sup>

$^1\text{H NMR}$  (400 MHz,  $(\text{CD}_3)_2\text{SO}$ )  $\delta$  7.31 (dd,  $J = 8.2, 1.5$  Hz, 2H), 7.25 (dd,  $J = 8.4, 6.9$  Hz, 2H), 7.14 – 7.07 (m, 1H), 6.47 (d,  $J = 18.8$  Hz, 1H), 6.18 (dq,  $J = 18.2, 3.5$  Hz, 1H).

#### potassium trifluoro(quinolin-3-yl)borate (1r)

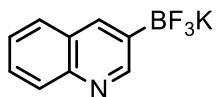

Following General Procedure for Aryl- $\text{BF}_3\text{K}$  Synthesis, quinolin-3-ylboronic acid (1.30 g, 7.50 mmol) was used as the aryl- $\text{B}(\text{OH})_2$  reagent and the procedure was scaled accordingly. The title compound was isolated via crystallization in acetone. The title compound was obtained in 82% yield (1.45 g, 6.17 mmol) as a white solid.

Characterization data match those of previously reported literature.<sup>13</sup>

$^1\text{H NMR}$  (400 MHz,  $(\text{CD}_3)_2\text{SO}$ )  $\delta$  8.87 (s, 1H), 8.12 (s, 1H), 7.90 (d,  $J = 8.3$  Hz, 1H), 7.83 (d,  $J = 7.9$  Hz, 1H), 7.63 – 7.52 (m, 1H), 7.53 – 7.39 (m, 1H).

$^{13}\text{C NMR}$  (101 MHz,  $(\text{CD}_3)_2\text{SO}$ )  $\delta$  155.2 (q,  $J = 1.4$  Hz), 146.7, 137.5 (q,  $J = 2.1$  Hz), 128.4, 128.2, 127.6, 127.4, 125.1.

$^{19}\text{F NMR}$  (376 MHz,  $(\text{CD}_3)_2\text{SO}$ )  $\delta$  -138.80 (bs).

$^{11}\text{B NMR}$  (128 MHz,  $(\text{CD}_3)_2\text{SO}$ )  $\delta$  3.20 (bs).

#### potassium trifluoro(2-methoxypyrimidin-5-yl)borate (1s)

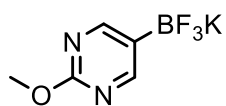

Following General Procedure for Aryl-BF<sub>3</sub>K Synthesis, 2-methoxypyrimidin-5-ylboronic acid (615 mg, 4.00 mmol) was used as the aryl-B(OH)<sub>2</sub> reagent and the procedure was scaled accordingly. The title compound was isolated via crystallization in acetone. The title compound was obtained in 53% yield (460 mg, 2.13 mmol) as a white solid. Characterization data match those of previously reported literature.<sup>14</sup>

<sup>1</sup>H NMR (400 MHz, (CD<sub>3</sub>)<sub>2</sub>SO) δ 8.34 (s, 2H), 3.83 (s, 3H).  
<sup>13</sup>C NMR (101 MHz, (CD<sub>3</sub>)<sub>2</sub>SO) δ 164.1, 161.7 (q, *J* = 1.8 Hz), 53.6.  
<sup>19</sup>F NMR (376 MHz, (CD<sub>3</sub>)<sub>2</sub>SO) δ -138.36 (bs).  
<sup>11</sup>B NMR (128 MHz, (CD<sub>3</sub>)<sub>2</sub>SO) δ 3.66 – 2.00 (m).

#### potassium (2-chloropyridin-3-yl)trifluoroborate (1t)

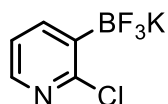

Following General Procedure for Aryl-BF<sub>3</sub>K Synthesis, 2-chloropyridin-3-ylboronic acid (1.17 g, 7.44 mmol) was used as the aryl-B(OH)<sub>2</sub> reagent and the procedure was scaled accordingly. The title compound was isolated via crystallization in acetone. The title compound was obtained in 91% yield (1.49 g, 6.79 mmol) as a white solid.

<sup>1</sup>H NMR (400 MHz, (CD<sub>3</sub>)<sub>2</sub>SO) δ 8.08 (dd, *J* = 4.7, 2.3 Hz, 1H), 7.75 (dd, *J* = 7.2, 2.3 Hz, 1H), 7.17 – 7.08 (m, 1H).  
<sup>13</sup>C NMR (101 MHz, (CD<sub>3</sub>)<sub>2</sub>SO) δ 155.3, 147.2, 143.2, 122.1.  
<sup>19</sup>F NMR (376 MHz, (CD<sub>3</sub>)<sub>2</sub>SO) δ -138.53 – -142.93 (m).  
<sup>11</sup>B NMR (128 MHz, (CD<sub>3</sub>)<sub>2</sub>SO) δ 2.02 (q, *J* = 47.9 Hz).  
HRMS (ESI-ion trap) (*m/z*): [*M*]<sup>+</sup> for C<sub>5</sub>H<sub>3</sub>BClF<sub>3</sub>N: calcd for 179.9999, found 180.0005.

#### potassium trifluoro(2-methoxypyridin-3-yl)borate (1u)

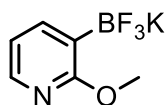

Following General Procedure for Aryl-BF<sub>3</sub>K Synthesis, 2-methoxypyridin-3-ylboronic acid (1.15 g, 7.50 mmol) was used as the aryl-B(OH)<sub>2</sub> reagent and the procedure was scaled accordingly. The title compound was isolated via crystallization in acetone. The title compound was obtained in 78% yield (1.26 g, 5.86 mmol) as a white solid.

<sup>1</sup>H NMR (400 MHz, (CD<sub>3</sub>)<sub>2</sub>SO) δ 7.87 (dd, *J* = 5.0, 2.2 Hz, 1H), 7.56 (dd, *J* = 6.8, 2.2 Hz, 1H), 6.77 – 6.61 (m, 1H).  
<sup>13</sup>C NMR (101 MHz, (CD<sub>3</sub>)<sub>2</sub>SO) δ 166.8, 144.0, 142.0, 116.4, 52.6.  
<sup>19</sup>F NMR (376 MHz, (CD<sub>3</sub>)<sub>2</sub>SO) δ -138.40.  
<sup>11</sup>B NMR (128 MHz, (CD<sub>3</sub>)<sub>2</sub>SO) δ 2.48 (d, *J* = 50.9 Hz).  
HRMS (ESI-ion trap) (*m/z*): [*M*]<sup>+</sup> for C<sub>6</sub>H<sub>6</sub>BF<sub>3</sub>NO: calcd for 176.0495, found 176.0500.

### Characterization of Isolated Products

#### 4-chloro-1,1'-biphenyl (2b):

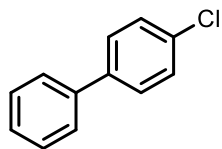

General Procedure A was used but was scaled up to include potassium [1,1'-biphenyl]-4-yltrifluoroborate (260 mg, 1.00 mmol), pyridine (316 mg, 4.00 mM, 4.00 eq.), lithium perchlorate (212 mg, 2.00 mmol, 2.00 eq.), tetramethylammonium chloride (438 mg, 4.00 mmol, 4.00 eq.) in 9.5 mL acetonitrile and 0.5 mL HFIP (5% /v). The title compound was extracted with pentane (50 mL x 3) from 2M HCl (100 mL). The organic phase was

washed with saturated brine solution (100 mL) and dried over anhydrous sodium sulfate. The solvent was removed under reduced pressure. The title compound was obtained in 84% yield (158 mg, 0.838 mmol) as a white solid. Characterization data match those of previously reported literature.<sup>16</sup>

<sup>1</sup>H NMR (400 MHz, CDCl<sub>3</sub>) δ 7.60 – 7.49 (m, 4H), 7.49 – 7.40 (m, 4H), 7.40 – 7.34 (m, 1H).  
<sup>13</sup>C{<sup>1</sup>H} NMR (101 MHz, CDCl<sub>3</sub>) δ 140.1, 139.8, 133.5, 129.0, 129.0, 128.5, 127.7, 127.1.

#### chlorobenzene (2c):

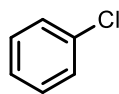

Following General Procedure A, potassium trifluoro(phenyl)borate (55 mg, 0.30 mmol) was used as the aryl-BF<sub>3</sub>K reagent. The product yield was determined by gas chromatography using dodecane as the internal standard (97%) due to the low boiling point of the product. GC analysis of the title compound reaction mixture agreed with the Gas Chromatography spectra of a commercially available sample.

#### 1-chloro-2-methylbenzene (2d):

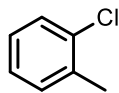

Following General Procedure B, potassium trifluoro(o-tolyl)borate (59 mg, 0.30 mmol) was used as the aryl-BF<sub>3</sub>K reagent. The title compound was extracted with pentane and isolated via flash column chromatography (100% hexane). The title compound was obtained in 90% yield (34 mg, 0.28 mmol) as a clear liquid. Characterization data match those of previously reported literature.<sup>15</sup>

<sup>1</sup>H NMR (400 MHz, CDCl<sub>3</sub>) δ 7.37 – 7.31 (m, 1H), 7.24 – 7.20 (m, 1H), 7.18 – 7.09 (m, 2H), 2.38 (s, 3H).

<sup>13</sup>C{<sup>1</sup>H} NMR (101 MHz, CDCl<sub>3</sub>) δ 136.2, 134.5, 131.1, 129.2, 127.2, 126.7, 20.2.

#### 1-(tert-butyl)-4-chlorobenzene (2e):

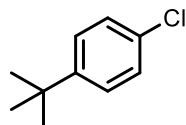

Following General Procedure B, potassium (4-(tert-butyl)phenyl)trifluoroborate (72 mg, 0.30 mmol) was used as the aryl-BF<sub>3</sub>K reagent. The title compound was extracted with pentane and isolated via flash column chromatography (100% hexane). The title compound was obtained in 89% yield (45 mg, 0.27 mmol) as a yellow liquid. Characterization data match those of previously reported literature.<sup>16</sup>

<sup>1</sup>H NMR (400 MHz, CDCl<sub>3</sub>) δ 7.27 – 7.20 (m, 2H), 7.20 – 7.14 (m, 2H), 1.22 (s, 9H).

<sup>13</sup>C{<sup>1</sup>H} NMR (101 MHz, CDCl<sub>3</sub>) δ 149.7, 131.3, 128.2, 126.9, 34.6, 31.4.

#### 4-chloroanisole (2f):

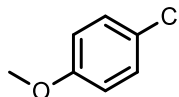

Following General Procedure B, potassium 4-methoxyphenyltrifluoroborate (64 mg, 0.30 mmol) was used as the aryl-BF<sub>3</sub>K reagent. The solution was electrolyzed until 12 mAh (1.5 F/mol) of capacity was achieved. The title compound was extracted with pentane and isolated via flash column chromatography (100% hexane). The title compound was obtained in 63% yield (27 mg, 0.19 mmol) as a yellow liquid. Characterization data match those of previously reported literature.<sup>15</sup>

<sup>1</sup>H NMR (400 MHz, CDCl<sub>3</sub>) δ 7.26 – 7.21 (m, 2H), 6.86 – 6.80 (m, 2H), 3.79 (s, 3H).

<sup>13</sup>C{<sup>1</sup>H} NMR (101 MHz, CDCl<sub>3</sub>) δ 158.3, 129.4, 125.7, 115.3, 55.6.

#### 2-chloro-1,3,5-trimethylbenzene (2h):

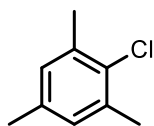

Following General Procedure A, potassium trifluoro(mesityl)borate (68 mg, 0.30 mmol) was used as the aryl-BF<sub>3</sub>K reagent. The title compound was extracted with pentane and isolated via flash column chromatography (100% hexane). The title compound was obtained in 54% yield (25 mg, 0.16 mmol) as a clear liquid. Characterization data match those of previously reported literature.<sup>17</sup>

<sup>1</sup>H NMR (400 MHz, CDCl<sub>3</sub>) δ 6.90 (s, 2H), 2.35 (s, 6H), 2.27 (s, 3H).

<sup>13</sup>C{<sup>1</sup>H} NMR (101 MHz, CDCl<sub>3</sub>) δ 136.0, 135.7, 129.3, 77.2, 20.8, 20.7.

#### 1-chloro-2,4-difluorobenzene (2i):

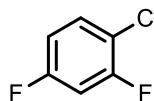

Following General Procedure A, potassium trifluoro(phenyl)borate (66 mg, 0.30 mmol) was used as the aryl-BF<sub>3</sub>K reagent. The product yield was determined by gas chromatography using dodecane as the internal standard (92%) due to the low boiling point of the product.<sup>19</sup> <sup>19</sup>F NMR was used to confirm the identity of **2i** with previously reported literature.<sup>18</sup>

<sup>19</sup>F NMR (376 MHz, CDCl<sub>3</sub>) δ -110.54, -111.31.

**1-bromo-4-chlorobenzene (2j):**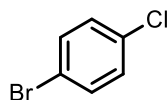

Following General Procedure A, potassium (4-bromophenyl)trifluoroborate (79 mg, 0.30 mmol) was used as the aryl-BF<sub>3</sub>K reagent. The title compound was extracted with pentane and isolated via flash column chromatography (100% hexane). The title compound was obtained in 73% yield (42 mg, 0.22 mmol) as a yellow liquid. Characterization data match those of previously reported literature.<sup>19</sup>

<sup>1</sup>H NMR (400 MHz, CDCl<sub>3</sub>) δ 7.46 – 7.38 (m, 2H), 7.25 – 7.17 (m, 2H).

<sup>13</sup>C{<sup>1</sup>H} NMR (101 MHz, CDCl<sub>3</sub>) δ 133.4, 132.9, 130.3, 120.4.

**1-bromo-2-chlorobenzene (2k):**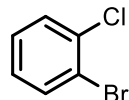

Following General Procedure B, potassium (2-bromophenyl)trifluoroborate (79 mg, 0.30 mmol) was used as the aryl-BF<sub>3</sub>K reagent. The title compound was extracted with pentane and isolated via flash column chromatography (100% hexane). The title compound was obtained in 89% yield (51 mg, 0.27 mmol) as a yellow liquid. Characterization data match those of previously reported literature.<sup>19</sup>

<sup>1</sup>H NMR (400 MHz, CDCl<sub>3</sub>) δ 7.62 (dd, *J* = 8.0, 1.6 Hz, 1H), 7.45 (dd, *J* = 8.0, 1.6 Hz, 1H), 7.25 (ddd, *J* = 8.0, 7.4, 1.5 Hz, 1H), 7.12 (ddd, *J* = 8.0, 7.4, 1.6 Hz, 1H).

<sup>13</sup>C{<sup>1</sup>H} NMR (101 MHz, CDCl<sub>3</sub>) δ 134.6, 133.9, 130.6, 128.6, 128.0, 122.7.

**methyl 4-chlorobenzoate (2l):**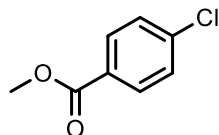

Following General Procedure C, potassium trifluoro(4-(methoxycarbonyl)phenyl)borate (73 mg, 0.30 mmol) was used as the aryl-BF<sub>3</sub>K reagent. The title compound was extracted with pentane:diethyl ether (3:1) and isolated via flash column chromatography (30% EtOAc in Hexane). The title compound was obtained in 49% yield (25 mg, 0.15 mmol) as a white solid.

<sup>1</sup>H NMR (400 MHz, CDCl<sub>3</sub>) δ 8.28 (d, *J* = 7.9 Hz, 2H), 8.16 (d, *J* = 8.0 Hz, 2H), 3.97 (s, 3H).

<sup>13</sup>C{<sup>1</sup>H} NMR (101 MHz, CDCl<sub>3</sub>) δ 167.1, 133.9, 133.7, 129.1, 52.5.

HRMS (ESI-TOF) (*m/z*): [M+H]<sup>+</sup> for C<sub>8</sub>H<sub>8</sub>ClO<sub>2</sub>: calcd for 171.0213, found 171.0207.

**1-(4-chlorophenyl)ethan-1-one (2m):**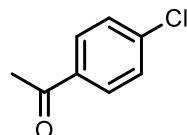

Following General Procedure B, potassium (4-acetylphenyl)trifluoroborate (68 mg, 0.30 mmol) was used as the aryl-BF<sub>3</sub>K reagent. The title compound was extracted with pentane and isolated via flash column chromatography (30% EtOAc in Hexane). The title compound was obtained in 39% yield (18 mg, 0.12 mmol) as a clear liquid.

<sup>1</sup>H NMR (400 MHz, CDCl<sub>3</sub>) δ 7.94 – 7.85 (dt, 2H), 7.48 – 7.40 (dt, 2H), 2.59 (s, 3H).

<sup>13</sup>C{<sup>1</sup>H} NMR (101 MHz, CDCl<sub>3</sub>) δ 197.0, 139.7, 135.6, 129.9, 129.1, 26.7.

HRMS (ESI-TOF) (*m/z*): [M+H]<sup>+</sup> for C<sub>8</sub>H<sub>8</sub>ClO: calcd for 155.0263, found 155.0257.

**(4-chlorophenyl)(phenyl)methanone (2n):**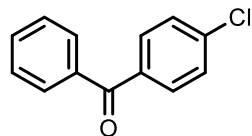

Following General Procedure A, potassium (4-benzoylphenyl)trifluoroborate (86 mg, 0.30 mmol) was used as the aryl-BF<sub>3</sub>K reagent. The title compound was extracted with diethyl ether and isolated via flash column chromatography (20% Acetone in Pentane). The title compound was obtained in 63% yield (41 mg, 0.19 mmol) as a brown solid.

<sup>1</sup>H NMR (400 MHz, CDCl<sub>3</sub>) δ 7.86 – 7.69 (m, 4H), 7.64 – 7.55 (tt, 1H), 7.55 – 7.41 (m, 4H).

<sup>13</sup>C{<sup>1</sup>H} NMR (101 MHz, CDCl<sub>3</sub>) δ 195.6, 139.0, 137.4, 136.0, 132.8, 131.6, 130.1, 128.8, 128.5.

HRMS (ESI-TOF) (*m/z*): [M+H]<sup>+</sup> C<sub>13</sub>H<sub>10</sub>ClO: calcd for 217.0420, found 217.0412.

**1-chloro-4-(trifluoromethyl)benzene (2o):**

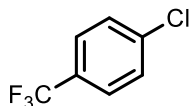

Following General Procedure C, potassium trifluoro(4-(trifluoromethyl)phenyl)borate (76 mg, 0.30 mmol) was used as the aryl-BF<sub>3</sub>K reagent. The product yield was determined by gas chromatography using dodecane as the internal standard (59%) due to the low boiling point of the product.

### (E)-(2-chlorovinyl)benzene (2q):

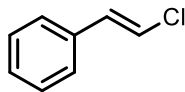

Following General Procedure A, potassium (E)-trifluoro(styryl)borate (63 mg, 0.30 mmol) was used as the aryl-BF<sub>3</sub>K reagent. The title compound was extracted with pentane and isolated via flash column chromatography (100% hexane). The title compound was obtained in 60% yield (25 mg, 0.18 mmol) as a yellow liquid. Characterization data match those of previously reported literature.<sup>20</sup>

<sup>1</sup>H NMR (400 MHz, CDCl<sub>3</sub>) δ 7.33 – 7.18 (m, 5H), 6.80 (d, *J* = 13.7 Hz, 1H), 6.60 (d, *J* = 13.7 Hz, 1H)

<sup>13</sup>C{<sup>1</sup>H} NMR (101 MHz, CDCl<sub>3</sub>) δ 135.0, 133.4, 128.9, 128.3, 126.3, 118.8.

### 3-chloroquinoline (2r):

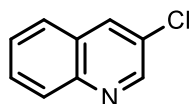

Following General Procedure A, potassium trifluoro(quinolin-3-yl)borate (71 mg, 0.30 mmol) was used as the aryl-BF<sub>3</sub>K reagent. The title compound was extracted with 1:1 pentane:diethyl ether and isolated via flash column chromatography (50% diethyl ether in pentane). The title compound was obtained in 53% yield (26 mg, 0.16 mmol) as a clear liquid.

<sup>1</sup>H NMR (400 MHz, CDCl<sub>3</sub>) δ 8.82 (d, *J* = 2.4 Hz, 1H), 8.13 (dd, *J* = 2.5, 0.8 Hz, 1H), 8.10 (dq, *J* = 8.4, 1.0 Hz, 1H), 7.75 (dd, *J* = 8.1, 1.4 Hz, 1H), 7.71 (ddd, *J* = 8.4, 6.9, 1.5 Hz, 1H), 7.58 (ddd, *J* = 8.1, 6.9, 1.2 Hz, 1H).

<sup>13</sup>C{<sup>1</sup>H} NMR (101 MHz, CDCl<sub>3</sub>) δ 149.8, 146.4, 134.1, 129.8, 129.6, 128.6, 127.8, 127.1.

HRMS (ESI-TOF) (*m/z*): [M+H]<sup>+</sup> C<sub>9</sub>H<sub>7</sub>ClN calcd for 164.0267, found 164.0263.

### 5-chloro-2-methoxypyrimidine (2s):

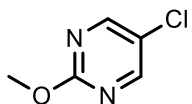

Following General Procedure A, potassium trifluoro(2-methoxypyrimidin-5-yl)borate (65 mg, 0.30 mmol) was used as the aryl-BF<sub>3</sub>K reagent. The title compound was extracted with 5:1 pentane:diethyl ether and isolated via flash column chromatography (20% diethyl ether in pentane). The title compound was obtained in 41% yield (18 mg, 0.12 mmol) as an off-white solid.

<sup>1</sup>H NMR (400 MHz, CDCl<sub>3</sub>) δ 8.45 (s, 2H), 4.00 (s, 3H).

<sup>13</sup>C{<sup>1</sup>H} NMR (101 MHz, CDCl<sub>3</sub>) δ 164.1, 157.6, 124.2, 55.6.

HRMS (ESI-TOF) (*m/z*): [M+H]<sup>+</sup> for C<sub>5</sub>H<sub>6</sub>ClN<sub>2</sub>O calcd for 145.0168, found 145.0164.

### 2,3-dichloropyridine (2t):

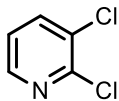

Following General Procedure B, potassium (2-chloropyridin-3-yl)trifluoroborate (66 mg, 0.30 mmol) was used as the aryl-BF<sub>3</sub>K reagent. The title compound was extracted with pentane and isolated via flash column chromatography (100% pentane). The title compound was obtained in 17% yield (8 mg, 0.05 mmol) as a yellow liquid.

<sup>1</sup>H NMR (400 MHz, CDCl<sub>3</sub>) δ 8.31 (dd, *J* = 4.7, 1.7 Hz, 1H), 7.78 (dd, *J* = 7.9, 1.7 Hz, 1H), 7.21 (dd, *J* = 7.9, 4.7 Hz, 1H).

<sup>13</sup>C{<sup>1</sup>H} NMR (101 MHz, CDCl<sub>3</sub>) δ 149.5, 147.5, 138.9, 130.9, 123.4.

HRMS (ESI-TOF) (*m/z*): [M+H]<sup>+</sup> C<sub>5</sub>H<sub>4</sub>Cl<sub>2</sub>N calcd for 147.9721, found 147.9716.

### 3-chloro-2-methoxypyridine (2u):

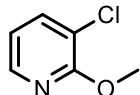

Following General Procedure B, potassium trifluoro(2-methoxy-pyridin-3-yl)borate (65 mg, 0.30 mmol) was used as the aryl-BF<sub>3</sub>K reagent. The title compound was extracted with 1:1 pentane:diethyl ether and isolated via flash column chromatography (100% pentane). The title compound was obtained in 30% yield (13 mg, 0.09 mmol) as a yellow liquid.

<sup>1</sup>H NMR (400 MHz, CDCl<sub>3</sub>) δ 8.06 (dd, *J* = 4.9, 1.7 Hz, 1H), 7.62 (dd, *J* = 7.6, 1.7 Hz, 1H), 6.84 (dd, *J* = 7.6, 4.9 Hz, 1H), 4.02 (s, 3H).

<sup>13</sup>C{<sup>1</sup>H} NMR (101 MHz, CDCl<sub>3</sub>) δ 159.4, 144.7, 138.2, 118.3, 117.4, 54.2.

HRMS (ESI-TOF) (*m/z*): [M+H]<sup>+</sup> C<sub>6</sub>H<sub>7</sub>ClNO calcd for 144.0216, found 144.0210.

### Sample Preparation for 4-fluorophenyl-BF<sub>2</sub>-Py complex (3a)

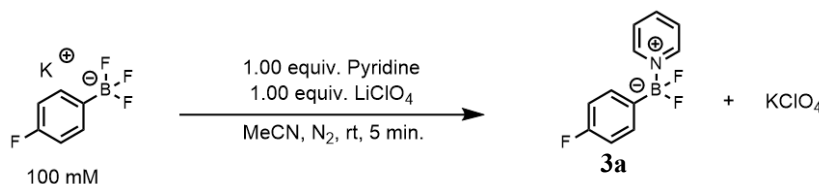

In a nitrogen filled glove box, a 4 mL vial was charged with a stir bar, potassium 4-fluorophenyl trifluoroborate (20 mg, 0.10 mmol, 1.0 equiv.), pyridine (9.0 mg, 0.11 mmol, 1.1 equiv.), and 1.0 mL of deuterated acetonitrile (MeCN-d<sub>3</sub>). The solution was allowed to stir until all solids dissolved. Lithium perchlorate (85 mg, 0.80 mmol, 8.0 equiv.) was added and the solution allowed to stir for five minutes. The solution was then filtered through a plug of celite into an NMR tube and analyzed via <sup>1</sup>H, <sup>19</sup>F, and <sup>11</sup>B NMR.

<sup>1</sup>H NMR (400 MHz, CD<sub>3</sub>CN) δ 8.76 – 8.68 (m, 2H), 8.32 – 8.17 (m, 1H), 7.83 – 7.74 (m, 2H), 7.52 (dd, *J* = 8.2, 6.2 Hz, 2H), 7.07 – 6.96 (m, 2H).

<sup>19</sup>F NMR (376 MHz, CH<sub>3</sub>CN) δ -115.85, -154.97.

<sup>11</sup>B NMR (128 MHz, CH<sub>3</sub>CN) δ 6.24 (t, *J* = 54.5 Hz).

### Sample Preparation for 4-biphenyl-BF<sub>2</sub>-Py Crystal (3b)

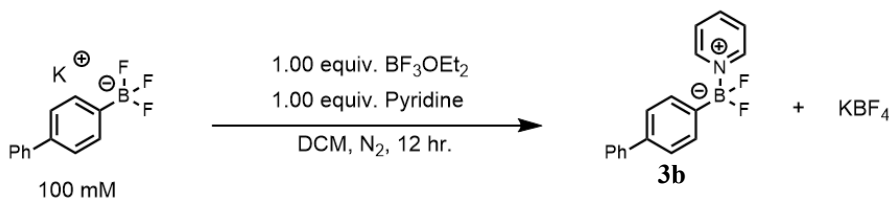

In a nitrogen filled glove box, a 40 mL vial was charged with a stir bar, 312 mg of potassium 4-biphenyl-trifluoroborate (312 mg, 1.20 mmol, 1.00 equiv.), and 12 mL of dichloromethane. Boron trifluoride diethyl etherate (170 mg, 1.20 mmol, 1.00 equiv.) was added dropwise with stirring followed by pyridine (95 mg, 1.20 mmol, 1.00 equiv.). The solution was allowed to stir overnight at room temperature. 16 mL of a 1:1:1 mixture of dichloromethane:acetone:pentane was added to crash out the potassium tetrafluoroborate salt. The solution was then filtered through a pad of celite. The filtrate was collected and placed in the freezer to crystallize.

<sup>1</sup>H NMR (400 MHz, CDCl<sub>3</sub>) δ 8.82 (dd, *J* = 6.5, 1.4 Hz, 2H), 8.13 (t, *J* = 7.7 Hz, 1H), 7.70 (t, *J* = 7.0 Hz, 2H), 7.64 (d, *J* = 8.0 Hz, 2H), 7.59 (dd, *J* = 8.3, 1.2 Hz, 2H), 7.54 (d, *J* = 8.0 Hz, 2H), 7.42 (t, *J* = 7.6 Hz, 2H), 7.32 (t, *J* = 7.4 Hz, 1H).

<sup>13</sup>C NMR (101 MHz, CDCl<sub>3</sub>) δ 143.9, 142.1, 141.7, 140.6, 132.1, 128.8, 127.2, 127.1, 126.6, 126.0.

<sup>19</sup>F NMR (376 MHz, CDCl<sub>3</sub>) δ -155.20.

<sup>11</sup>B NMR (128 MHz, CDCl<sub>3</sub>) δ 5.97.

### X-Ray Crystallography of 4-biphenyldifluoropyridiniumborate (3b)

### Experimental Summary



The single crystal X-ray diffraction studies were carried out on a Bruker Kappa Photon III CPAD diffractometer equipped with Mo K $\alpha$  radiation ( $\lambda = 0.71073 \text{ \AA}$ ). A 0.168 x 0.111 x 0.106 mm piece of a colorless block was mounted on a MiTeGen MicroMount with Paratone 24EX oil. Data were collected in a nitrogen gas stream at 100(2) K using  $\phi$  and  $\omega$  scans. Crystal-to-detector distance was 50 mm using variable exposure time (3s-10s) depending on  $\theta$  with a scan width of 1.0°. Data collection was 100% complete to 25.00° in  $\theta$  (0.83Å). A total of 42338 reflections were collected covering the indices,  $-15 \leq h \leq 15$ ,  $-17 \leq k \leq 17$ ,  $-10 \leq l \leq 10$ . 2890 reflections were found to be symmetry independent, with a  $R_{\text{int}}$  of 0.0608. Indexing and unit cell refinement indicated a primitive, monoclinic lattice. The space group was found to be  $P2_1/c$ . The data were integrated using the Bruker SAINT software program and scaled using the SADABS software program. Solution by dual-space method (SHELXT) produced a complete phasing model for refinement.

All nonhydrogen atoms were refined anisotropically by full-matrix least-squares (SHELXL-2014). All hydrogen atoms were placed using a riding model. Their positions were constrained relative to their parent atom using the appropriate HFIX command in SHELXL-2014. Crystallographic data are summarized in Table S5.

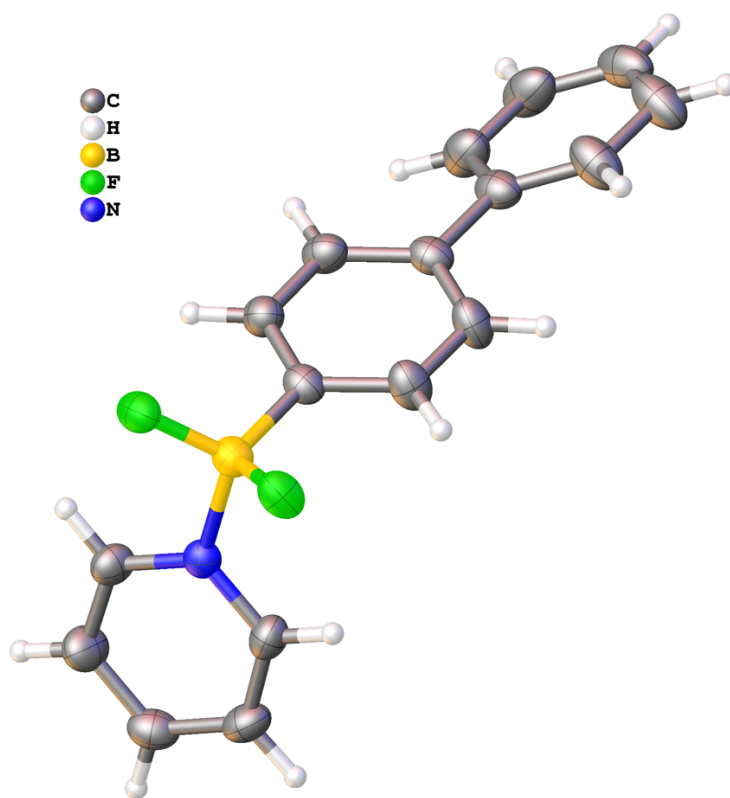

**Figure S14:** X-ray crystal structure of 4-biphenyl-BF<sub>2</sub>-Pyridine complex. Ellipsoid contour 50% probability.

Table S5. Crystal data and structure refinement for **3b**.

|                                   |                                             |                                |
|-----------------------------------|---------------------------------------------|--------------------------------|
| Report date                       | 2024-08-05                                  |                                |
| Identification code               | RES-0343                                    |                                |
| Empirical formula                 | C17.50 H15 B Cl F2 N                        |                                |
| Molecular formula                 | C17 H14 B F2 N, 0.5(C H2 Cl2)               |                                |
| Formula weight                    | 323.56                                      |                                |
| Temperature                       | 100.0 K                                     |                                |
| Wavelength                        | 0.71073 Å                                   |                                |
| Crystal system                    | Monoclinic                                  |                                |
| Space group                       | P 1 21/c 1                                  |                                |
| Unit cell dimensions              | a = 12.5824(5) Å                            | $\alpha = 90^\circ$ .          |
|                                   | b = 14.5804(6) Å                            | $\beta = 107.6260(10)^\circ$ . |
|                                   | c = 9.0368(4) Å                             | $\gamma = 90^\circ$ .          |
| Volume                            | 1580.03(11) Å <sup>3</sup>                  |                                |
| Z                                 | 4                                           |                                |
| Density (calculated)              | 1.360 Mg/m <sup>3</sup>                     |                                |
| Absorption coefficient            | 0.258 mm <sup>-1</sup>                      |                                |
| F(000)                            | 668                                         |                                |
| Crystal size                      | 0.168 x 0.111 x 0.106 mm <sup>3</sup>       |                                |
| Crystal color, habit              | colorless block                             |                                |
| Theta range for data collection   | 2.199 to 25.349°.                           |                                |
| Index ranges                      | -15<=h<=15, -17<=k<=17, -10<=l<=10          |                                |
| Reflections collected             | 42338                                       |                                |
| Independent reflections           | 2890 [R(int) = 0.0608, R(sigma) = 0.0216]   |                                |
| Completeness to theta = 25.000°   | 100.0 %                                     |                                |
| Absorption correction             | Semi-empirical from equivalents             |                                |
| Max. and min. transmission        | 0.0916 and 0.0696                           |                                |
| Refinement method                 | Full-matrix least-squares on F <sup>2</sup> |                                |
| Data / restraints / parameters    | 2890 / 26 / 232                             |                                |
| Goodness-of-fit on F <sup>2</sup> | 1.036                                       |                                |
| Final R indices [I>2sigma(I)]     | R1 = 0.0392, wR2 = 0.0958                   |                                |
| R indices (all data)              | R1 = 0.0555, wR2 = 0.1077                   |                                |
| Extinction coefficient            | n/a                                         |                                |
| Largest diff. peak and hole       | 0.235 and -0.267 e.Å <sup>-3</sup>          |                                |

Table S6. Atomic coordinates ( $\times 10^4$ ) and equivalent isotropic displacement parameters ( $\text{\AA}^2 \times 10^3$ ) for **3b**.  $U(\text{eq})$  is defined as one third of the trace of the orthogonalized  $U^{ij}$  tensor.

|        | x        | y        | z         | $U(\text{eq})$ |
|--------|----------|----------|-----------|----------------|
| F(1)   | -317(1)  | 7512(1)  | 8221(1)   | 34(1)          |
| F(2)   | 0(1)     | 6239(1)  | 9789(1)   | 36(1)          |
| N(1)   | -558(1)  | 6022(1)  | 7016(2)   | 26(1)          |
| C(1)   | 1454(1)  | 6645(1)  | 8512(2)   | 29(1)          |
| C(2)   | 1846(2)  | 7234(1)  | 7576(2)   | 33(1)          |
| C(3)   | 2953(2)  | 7233(1)  | 7593(2)   | 35(1)          |
| C(4)   | 3726(2)  | 6637(1)  | 8546(2)   | 32(1)          |
| C(5)   | 3345(2)  | 6044(2)  | 9482(2)   | 38(1)          |
| C(6)   | 2235(2)  | 6055(1)  | 9464(2)   | 37(1)          |
| C(7)   | 4916(2)  | 6621(1)  | 8563(2)   | 36(1)          |
| C(8)   | 5229(2)  | 6915(1)  | 7297(3)   | 45(1)          |
| C(9)   | 6336(2)  | 6891(1)  | 7307(3)   | 52(1)          |
| C(10)  | 7148(2)  | 6575(2)  | 8585(3)   | 49(1)          |
| C(11)  | 6862(2)  | 6277(2)  | 9848(3)   | 54(1)          |
| C(12)  | 5755(2)  | 6300(2)  | 9841(2)   | 48(1)          |
| C(13)  | -1132(2) | 6418(1)  | 5675(2)   | 33(1)          |
| C(14)  | -1743(2) | 5912(1)  | 4422(2)   | 40(1)          |
| C(15)  | -1755(2) | 4967(1)  | 4538(2)   | 38(1)          |
| C(16)  | -1150(2) | 4559(1)  | 5916(2)   | 39(1)          |
| C(17)  | -569(2)  | 5101(1)  | 7135(2)   | 34(1)          |
| B(1)   | 176(2)   | 6645(1)  | 8477(2)   | 29(1)          |
| Cl(1S) | 5245(8)  | 5646(5)  | 13775(8)  | 58(1)          |
| Cl(2S) | 5027(8)  | 4475(4)  | 16301(7)  | 58(1)          |
| C(1S)  | 4310(8)  | 5218(11) | 14762(16) | 50(2)          |
| Cl(1B) | 5230(18) | 5837(7)  | 13837(13) | 58(1)          |
| Cl(2B) | 5546(12) | 4479(7)  | 16323(8)  | 58(1)          |
| C(1SB) | 4536(17) | 5130(30) | 14940(40) | 50(2)          |
| Cl(1C) | 4280(20) | 5731(13) | 13980(30) | 58(1)          |
| Cl(2C) | 6004(16) | 4537(13) | 15970(20) | 58(1)          |
| C(1SC) | 4540(20) | 4810(30) | 15390(60) | 50(2)          |

Table S7. Bond lengths [Å] and angles [°] for **3b**.

|             |          |                  |            |
|-------------|----------|------------------|------------|
| F(1)-B(1)   | 1.396(2) | C(16)-H(16)      | 0.9500     |
| F(2)-B(1)   | 1.401(2) | C(16)-C(17)      | 1.373(3)   |
| N(1)-C(13)  | 1.339(2) | C(17)-H(17)      | 0.9500     |
| N(1)-C(17)  | 1.348(2) | Cl(1S)-C(1S)     | 1.791(8)   |
| N(1)-B(1)   | 1.638(2) | Cl(2S)-C(1S)     | 1.778(9)   |
| C(1)-C(2)   | 1.397(3) | C(1S)-H(1SA)     | 0.9900     |
| C(1)-C(6)   | 1.391(3) | C(1S)-H(1SB)     | 0.9900     |
| C(1)-B(1)   | 1.598(3) | Cl(1B)-C(1SB)    | 1.826(16)  |
| C(2)-H(2)   | 0.9500   | Cl(2B)-C(1SB)    | 1.767(17)  |
| C(2)-C(3)   | 1.389(3) | C(1SB)-H(1SE)    | 0.9900     |
| C(3)-H(3)   | 0.9500   | C(1SB)-H(1SF)    | 0.9900     |
| C(3)-C(4)   | 1.391(3) | Cl(1C)-C(1SC)    | 1.82(2)    |
| C(4)-C(5)   | 1.392(3) | Cl(2C)-C(1SC)    | 1.794(19)  |
| C(4)-C(7)   | 1.493(2) | C(1SC)-H(1SC)    | 0.9900     |
| C(5)-H(5)   | 0.9500   | C(1SC)-H(1SD)    | 0.9900     |
| C(5)-C(6)   | 1.392(3) |                  |            |
| C(6)-H(6)   | 0.9500   | C(13)-N(1)-C(17) | 119.08(16) |
| C(7)-C(8)   | 1.385(3) | C(13)-N(1)-B(1)  | 120.56(14) |
| C(7)-C(12)  | 1.388(3) | C(17)-N(1)-B(1)  | 120.33(15) |
| C(8)-H(8)   | 0.9500   | C(2)-C(1)-B(1)   | 121.72(16) |
| C(8)-C(9)   | 1.391(3) | C(6)-C(1)-C(2)   | 116.21(16) |
| C(9)-H(9)   | 0.9500   | C(6)-C(1)-B(1)   | 122.07(16) |
| C(9)-C(10)  | 1.369(3) | C(1)-C(2)-H(2)   | 119.0      |
| C(10)-H(10) | 0.9500   | C(3)-C(2)-C(1)   | 121.99(17) |
| C(10)-C(11) | 1.367(3) | C(3)-C(2)-H(2)   | 119.0      |
| C(11)-H(11) | 0.9500   | C(2)-C(3)-H(3)   | 119.4      |
| C(11)-C(12) | 1.392(3) | C(2)-C(3)-C(4)   | 121.26(17) |
| C(12)-H(12) | 0.9500   | C(4)-C(3)-H(3)   | 119.4      |
| C(13)-H(13) | 0.9500   | C(3)-C(4)-C(5)   | 117.34(17) |
| C(13)-C(14) | 1.375(3) | C(3)-C(4)-C(7)   | 121.82(17) |
| C(14)-H(14) | 0.9500   | C(5)-C(4)-C(7)   | 120.84(17) |
| C(14)-C(15) | 1.384(3) | C(4)-C(5)-H(5)   | 119.5      |
| C(15)-H(15) | 0.9500   | C(6)-C(5)-C(4)   | 120.96(18) |
| C(15)-C(16) | 1.382(3) | C(6)-C(5)-H(5)   | 119.5      |

|                   |            |                      |            |
|-------------------|------------|----------------------|------------|
| C(1)-C(6)-C(5)    | 122.25(18) | C(15)-C(16)-H(16)    | 120.4      |
| C(1)-C(6)-H(6)    | 118.9      | C(17)-C(16)-C(15)    | 119.29(17) |
| C(5)-C(6)-H(6)    | 118.9      | C(17)-C(16)-H(16)    | 120.4      |
| C(8)-C(7)-C(4)    | 121.43(18) | N(1)-C(17)-C(16)     | 121.73(17) |
| C(8)-C(7)-C(12)   | 117.16(18) | N(1)-C(17)-H(17)     | 119.1      |
| C(12)-C(7)-C(4)   | 121.41(18) | C(16)-C(17)-H(17)    | 119.1      |
| C(7)-C(8)-H(8)    | 119.3      | F(1)-B(1)-F(2)       | 110.28(14) |
| C(7)-C(8)-C(9)    | 121.4(2)   | F(1)-B(1)-N(1)       | 104.72(14) |
| C(9)-C(8)-H(8)    | 119.3      | F(1)-B(1)-C(1)       | 113.37(15) |
| C(8)-C(9)-H(9)    | 119.9      | F(2)-B(1)-N(1)       | 104.64(14) |
| C(10)-C(9)-C(8)   | 120.2(2)   | F(2)-B(1)-C(1)       | 113.53(15) |
| C(10)-C(9)-H(9)   | 119.9      | C(1)-B(1)-N(1)       | 109.56(13) |
| C(9)-C(10)-H(10)  | 120.2      | Cl(1S)-C(1S)-H(1SA)  | 109.6      |
| C(11)-C(10)-C(9)  | 119.6(2)   | Cl(1S)-C(1S)-H(1SB)  | 109.6      |
| C(11)-C(10)-H(10) | 120.2      | Cl(2S)-C(1S)-Cl(1S)  | 110.3(6)   |
| C(10)-C(11)-H(11) | 119.9      | Cl(2S)-C(1S)-H(1SA)  | 109.6      |
| C(10)-C(11)-C(12) | 120.3(2)   | Cl(2S)-C(1S)-H(1SB)  | 109.6      |
| C(12)-C(11)-H(11) | 119.9      | H(1SA)-C(1S)-H(1SB)  | 108.1      |
| C(7)-C(12)-C(11)  | 121.3(2)   | Cl(1B)-C(1SB)-H(1SE) | 109.8      |
| C(7)-C(12)-H(12)  | 119.3      | Cl(1B)-C(1SB)-H(1SF) | 109.8      |
| C(11)-C(12)-H(12) | 119.3      | Cl(2B)-C(1SB)-Cl(1B) | 109.2(11)  |
| N(1)-C(13)-H(13)  | 119.1      | Cl(2B)-C(1SB)-H(1SE) | 109.8      |
| N(1)-C(13)-C(14)  | 121.88(17) | Cl(2B)-C(1SB)-H(1SF) | 109.8      |
| C(14)-C(13)-H(13) | 119.1      | H(1SE)-C(1SB)-H(1SF) | 108.3      |
| C(13)-C(14)-H(14) | 120.4      | Cl(1C)-C(1SC)-H(1SC) | 109.9      |
| C(13)-C(14)-C(15) | 119.23(18) | Cl(1C)-C(1SC)-H(1SD) | 109.9      |
| C(15)-C(14)-H(14) | 120.4      | Cl(2C)-C(1SC)-Cl(1C) | 108.7(13)  |
| C(14)-C(15)-H(15) | 120.6      | Cl(2C)-C(1SC)-H(1SC) | 109.9      |
| C(16)-C(15)-C(14) | 118.79(18) | Cl(2C)-C(1SC)-H(1SD) | 109.9      |
| C(16)-C(15)-H(15) | 120.6      | H(1SC)-C(1SC)-H(1SD) | 108.3      |

---

Table S8. Anisotropic displacement parameters ( $\text{\AA}^2 \times 10^3$ ) for **3b**. The anisotropic displacement factor exponent takes the form:  $-2\pi^2 [ h^2 a^{*2} U^{11} + \dots + 2 h k a^* b^* U^{12} ]$

|        | $U^{11}$ | $U^{22}$ | $U^{33}$ | $U^{23}$ | $U^{13}$ | $U^{12}$ |
|--------|----------|----------|----------|----------|----------|----------|
| F(1)   | 29(1)    | 33(1)    | 40(1)    | -9(1)    | 12(1)    | 2(1)     |
| F(2)   | 32(1)    | 51(1)    | 27(1)    | 0(1)     | 12(1)    | -1(1)    |
| N(1)   | 24(1)    | 29(1)    | 27(1)    | 0(1)     | 11(1)    | 1(1)     |
| C(1)   | 28(1)    | 34(1)    | 26(1)    | -7(1)    | 9(1)     | 0(1)     |
| C(2)   | 31(1)    | 31(1)    | 37(1)    | -1(1)    | 11(1)    | 1(1)     |
| C(3)   | 33(1)    | 31(1)    | 44(1)    | -3(1)    | 17(1)    | -3(1)    |
| C(4)   | 29(1)    | 35(1)    | 32(1)    | -9(1)    | 10(1)    | -3(1)    |
| C(5)   | 29(1)    | 54(1)    | 30(1)    | 3(1)     | 7(1)     | 6(1)     |
| C(6)   | 32(1)    | 52(1)    | 30(1)    | 5(1)     | 12(1)    | 3(1)     |
| C(7)   | 32(1)    | 33(1)    | 44(1)    | -11(1)   | 13(1)    | -3(1)    |
| C(8)   | 37(1)    | 40(1)    | 65(1)    | 7(1)     | 25(1)    | 4(1)     |
| C(9)   | 45(1)    | 40(1)    | 83(2)    | 6(1)     | 36(1)    | 2(1)     |
| C(10)  | 32(1)    | 44(1)    | 76(2)    | -18(1)   | 23(1)    | -3(1)    |
| C(11)  | 32(1)    | 75(2)    | 51(1)    | -24(1)   | 6(1)     | 3(1)     |
| C(12)  | 33(1)    | 70(2)    | 41(1)    | -14(1)   | 11(1)    | 2(1)     |
| C(13)  | 41(1)    | 30(1)    | 29(1)    | 2(1)     | 12(1)    | -2(1)    |
| C(14)  | 48(1)    | 41(1)    | 28(1)    | 1(1)     | 7(1)     | -3(1)    |
| C(15)  | 39(1)    | 42(1)    | 35(1)    | -10(1)   | 14(1)    | -9(1)    |
| C(16)  | 44(1)    | 27(1)    | 49(1)    | -4(1)    | 18(1)    | -4(1)    |
| C(17)  | 38(1)    | 29(1)    | 36(1)    | 5(1)     | 13(1)    | 5(1)     |
| B(1)   | 30(1)    | 33(1)    | 26(1)    | -4(1)    | 10(1)    | 1(1)     |
| Cl(1S) | 73(2)    | 60(2)    | 43(1)    | 6(1)     | 21(1)    | -13(2)   |
| Cl(2S) | 73(2)    | 60(2)    | 43(1)    | 6(1)     | 21(1)    | -13(2)   |
| C(1S)  | 56(4)    | 58(3)    | 33(3)    | 10(3)    | 10(4)    | -7(3)    |
| Cl(1B) | 73(2)    | 60(2)    | 43(1)    | 6(1)     | 21(1)    | -13(2)   |
| Cl(2B) | 73(2)    | 60(2)    | 43(1)    | 6(1)     | 21(1)    | -13(2)   |
| C(1SB) | 56(4)    | 58(3)    | 33(3)    | 10(3)    | 10(4)    | -7(3)    |
| Cl(1C) | 73(2)    | 60(2)    | 43(1)    | 6(1)     | 21(1)    | -13(2)   |
| Cl(2C) | 73(2)    | 60(2)    | 43(1)    | 6(1)     | 21(1)    | -13(2)   |
| C(1SC) | 56(4)    | 58(3)    | 33(3)    | 10(3)    | 10(4)    | -7(3)    |

Table S9. Hydrogen coordinates ( $\times 10^4$ ) and isotropic displacement parameters ( $\text{\AA}^2 \times 10^{-3}$ ) for **3b**.

|        | x     | y    | z     | U(eq) |
|--------|-------|------|-------|-------|
| H(2)   | 1340  | 7649 | 6908  | 39    |
| H(3)   | 3187  | 7646 | 6941  | 42    |
| H(5)   | 3850  | 5625 | 10142 | 46    |
| H(6)   | 2004  | 5645 | 10124 | 45    |
| H(8)   | 4675  | 7138 | 6404  | 55    |
| H(9)   | 6530  | 7095 | 6424  | 63    |
| H(10)  | 7904  | 6563 | 8594  | 59    |
| H(11)  | 7422  | 6053 | 10734 | 65    |
| H(12)  | 5569  | 6092 | 10728 | 57    |
| H(13)  | -1116 | 7067 | 5588  | 40    |
| H(14)  | -2151 | 6209 | 3487  | 48    |
| H(15)  | -2173 | 4604 | 3687  | 45    |
| H(16)  | -1135 | 3910 | 6018  | 46    |
| H(17)  | -164  | 4819 | 8086  | 41    |
| H(1SA) | 3985  | 5738 | 15184 | 60    |
| H(1SB) | 3692  | 4881 | 14020 | 60    |
| H(1SE) | 4127  | 5529 | 15469 | 60    |
| H(1SF) | 3992  | 4718 | 14225 | 60    |
| H(1SC) | 4321  | 4997 | 16305 | 60    |
| H(1SD) | 4103  | 4259 | 14927 | 60    |

## References

- (1) Vedejs, E.; Chapman, R. W.; Fields, S. C.; Lin, S.; Schrimpf, M. R. Conversion of Arylboronic Acids into Potassium Aryltrifluoroborates: Convenient Precursors of Arylboron Difluoride Lewis Acids. *J. Org. Chem.* **1995**, *60*(10), 3020–3027.
- (2) Fulmer, G. R.; Miller, A. J. M.; Sherden, N. H.; Gottlieb, H. E.; Nudelman, A.; Stoltz, B. M.; Bercaw, J. E.; Goldberg, K. I. NMR Chemical Shifts of Trace Impurities: Common Laboratory Solvents, Organics, and Gases in Deuterated Solvents Relevant to the Organometallic Chemist. *Organometallics* **2010**, *29*(9), 2176–2179.
- (3) Walker, B. R.; Manabe, S.; Brusoe, A. T.; Sevov, C. S. Mediator-Enabled Electrocatalysis with Ligandless Copper for Anaerobic Chan-Lam Coupling Reactions. *J. Am. Chem. Soc.* **2021**, *143*, 6265.
- (4) Niwa, T.; Takimoto, T.; Sakata, Y.; Hosoya, T. Palladium-Catalyzed Ipso-Borylation of Aryl Halides Promoted by Lewis Acid-Mediated Electrophilic Activation of Aryl(Halo)Palladium(II) Complex. *Org. Lett.* **2023**, *25*(45), 8173–8177.
- (5) Chen, Z.; Liu, Y.; Zeng, C.; Ren, C.; Li, H.; Jagadeesh, R. V.; Yuan, Z.; Li, X. Borylation of Phenols Using Sulfuryl Fluoride Activation. *Green Chem.* **2023**, *25*(20), 7998–8006.
- (6) Karandikar, S. S.; Stuart, D. R. Refining Boron-Iodane Exchange to Access Versatile Arylation Reagents. *Chem. Commun.* **2022**, *58*(8), 1211–1214.
- (7) Dyga, M.; Hayrapetyan, D.; Rit, R. K.; Gooßen, L. J. Electrochemical Ipso-Thiocyanation of Arylboron Compounds. *Adv. Synth. Catal.* **2019**, *361*(15), 3548–3553.
- (8) Lim, T.; Ryoo, J. Y.; Han, M. S. Transition-Metal-Free Borylation of Aryl Bromide Using a Simple Diboron Source. *J. Org. Chem.* **2020**, *85*(16), 10966–10972.
- (9) Pecorari, D.; Giuliani, E.; Mazzanti, A.; Stagni, S.; Fiorini, V.; Vigarani, G.; Zinna, F.; Pescitelli, G.; Mancinelli, M. Synthesis and Stereodynamic and Emission Properties of Dissymmetric Bis-Aryl Carbazole Boranes and Identification of a CPL-Active B-C Atropisomeric Compound. *J. Org. Chem.* **2023**, *88*(2), 871–881.
- (10) Liesen, A. P.; Silva, A. T.; Sousa, J. C.; Menezes, P. H.; Oliveira, R. A. Copper-Catalyzed Amination of Potassium Aryl Trifluoroborates Using Aqueous Ammonia. *Tetrahedron Lett.* **2012**, *53*(32), 4240–4242.
- (11) Varni, A. J.; Bautista, M. V.; Noonan, K. J. T. Chemoselective Rhodium-Catalyzed Borylation of Bromiodoarenes under Mild Conditions. *J. Org. Chem.* **2020**, *85*(10), 6770–6777.
- (12) Brals, J.; McGuire, T. M.; Watson, A. J. B. A Chemoselective Polarity-Mismatched Photocatalytic C Sp<sup>3</sup> C Sp<sup>2</sup> Cross-Coupling Enabled by Synergistic Boron Activation. *Angew. Chem Int. Ed.* **2023**, *62*(42), e202310462.
- (13) Presset, M.; Oehlich, D.; Rombouts, F.; Molander, G. A. Copper-Mediated Radical Trifluoromethylation of Unsaturated Potassium Organotrifluoroborates. *J. Org. Chem.* **2013**, *78*(24), 12837–12843.
- (14) Molander, G. A.; Canturk, B.; Kennedy, L. E. Scope of the Suzuki-Miyaura Cross-Coupling Reactions of Potassium Heteroaryltrifluoroborates. *J. Org. Chem.* **2009**, *74*(3), 973–980.
- (15) Kawamorita, S.; Ohmiya, H.; Iwai, T.; Sawamura, M. Palladium-Catalyzed Borylation of Sterically Demanding Aryl Halides with a Silica-Supported Compact Phosphane Ligand. *Angew. Chemie - Int. Ed.* **2011**, *50*(36), 8363–8366.
- (16) Chen, M.-Y.; Charvet, S.; Payard, P.-A.; Perrin, M.-E. L.; Vantourout, J. C. Electrochemically Driven Nickel-Catalyzed Halogenation of Unsaturated Halide and Triflate. *Angew. Chem Int. Ed.* **2024**, No. 63, e202311165.
- (17) Erturk, E.; Yesil, T. A. Catalyst-Tuned Electrophilic Chlorination of Diverse Aromatic Compounds with Sulfuryl Chloride and Regioselective Chlorination of Phenols with Organocatalysts. *J. Org. Chem.* **2022**, No. 87, 12558–12573.
- (18) Wang, W.; Yang, X.; Dai, R.; Yan, Z.; Wei, J.; Dou, X.; Qiu, X.; Zhang, H.; Wang, C.; Liu, Y.; Song, S.; Jiao, N. Catalytic Electrophilic Halogenation of Arenes with Electron-Withdrawing Substituents. *J. Am. Chem. Soc.* **2022**, *144*(29), 13415–13425.
- (19) Phuc Tran, D.; Nomoto, A.; Mita, S.; Dong, C. ping; Kodama, S.; Mizuno, T.; Ogawa, A. Metal- and Base-Free Synthesis of Aryl Bromides from Arylhydrazines. *Tetrahedron Lett.* **2020**, *61*(23), 151959.
- (20) Deng, Y.; Wei, X. J.; Wang, X.; Sun, Y.; Noël, T. Iron-Catalyzed Cross-Coupling of Alkynyl and Styrenyl Chlorides with Alkyl Grignard Reagents in Batch and Flow. *Chem. - A Eur. J.* **2019**, *25*(64), 14532–14535.



**<sup>1</sup>H-NMR**  
DMSO-d<sub>6</sub>  
400 MHz

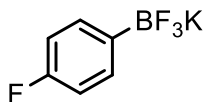

**1a**

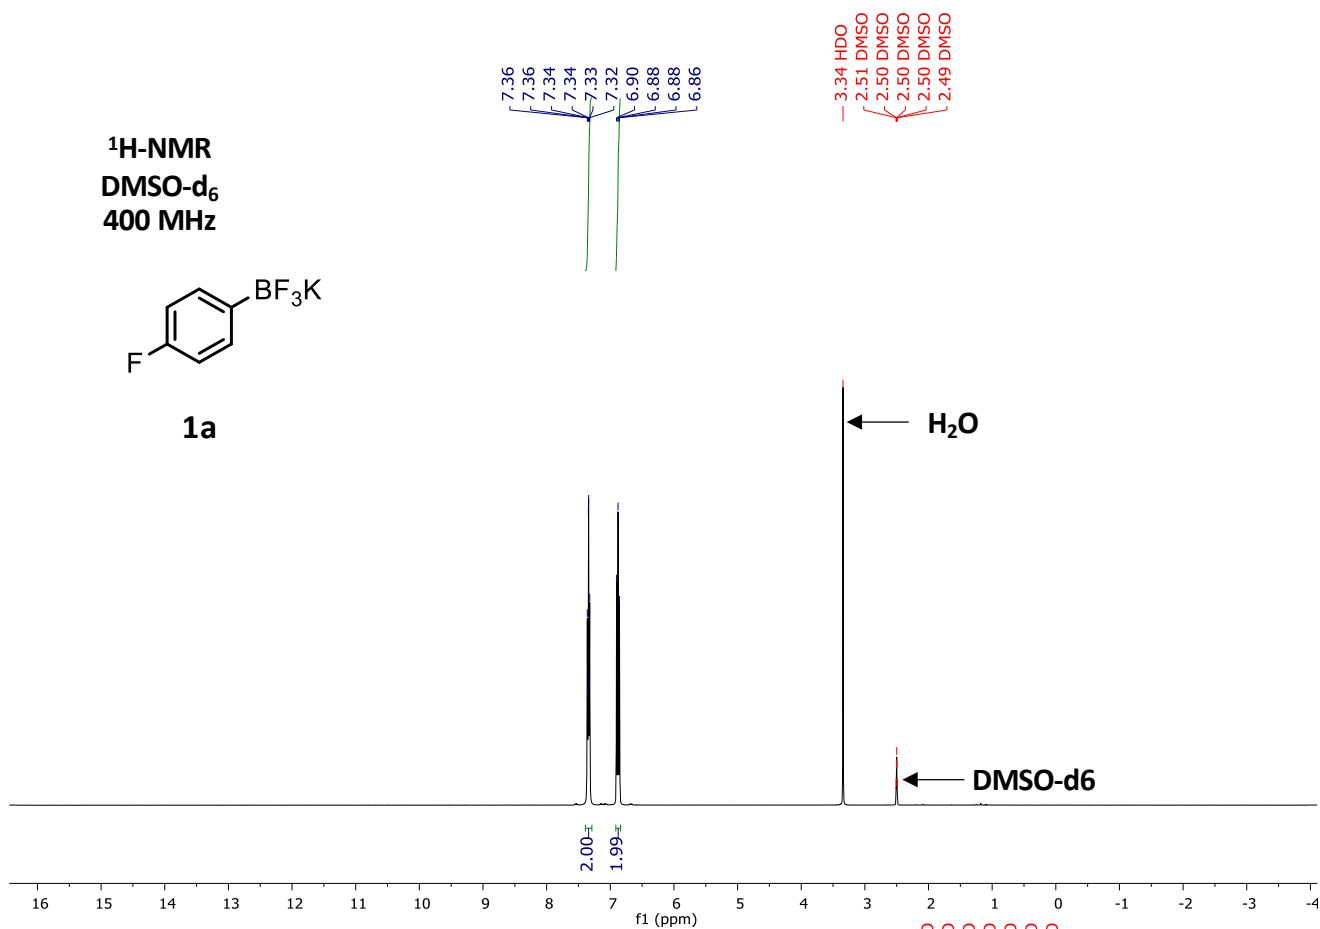

**<sup>13</sup>C{<sup>1</sup>H}-NMR**  
DMSO-d<sub>6</sub>  
101 MHz

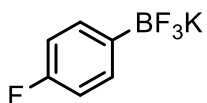

**1a**

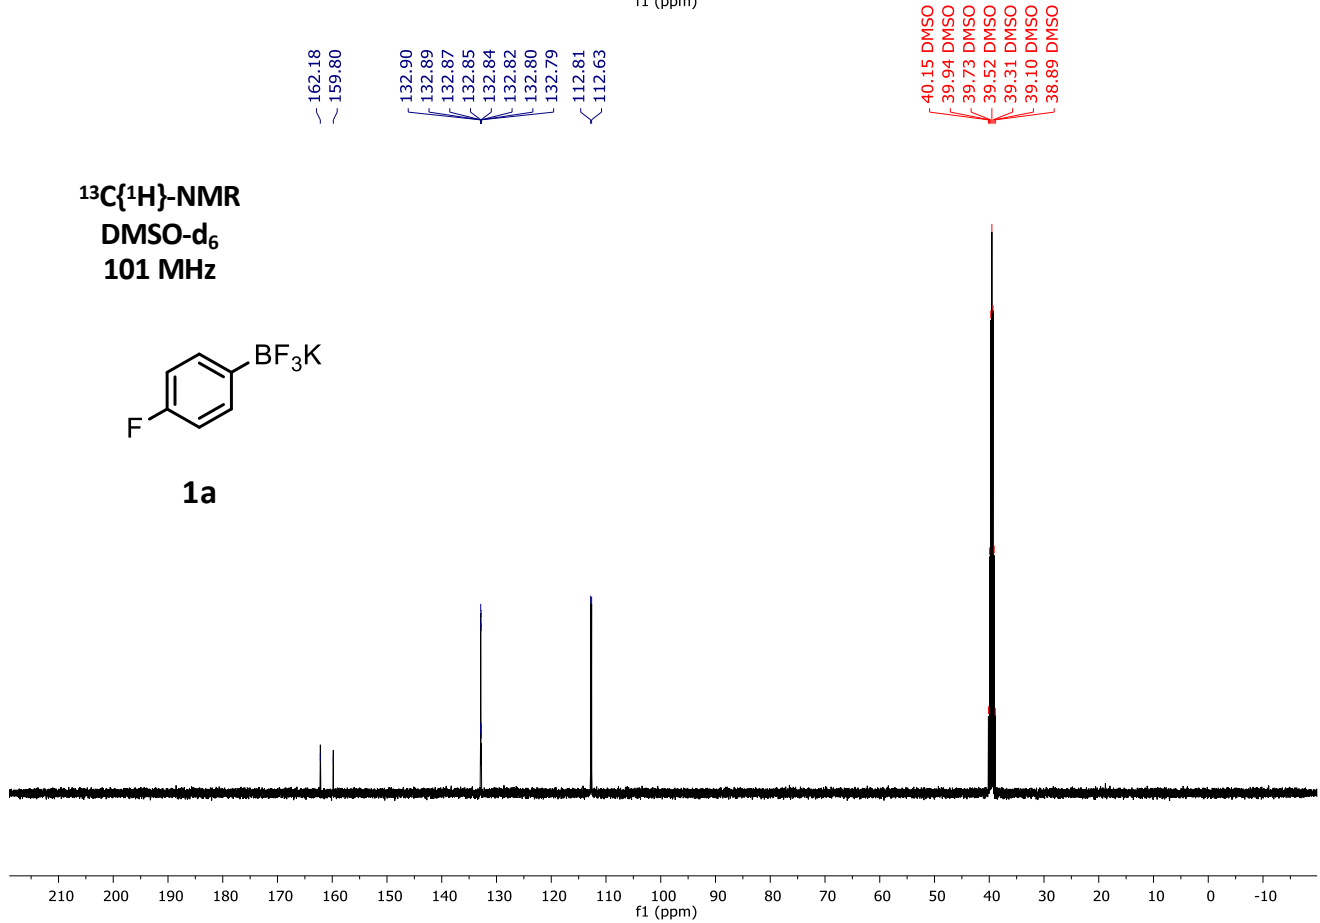

**<sup>19</sup>F-NMR**  
**DMSO-d<sub>6</sub>**  
**376 MHz**

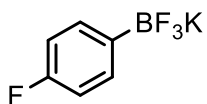

**1a**

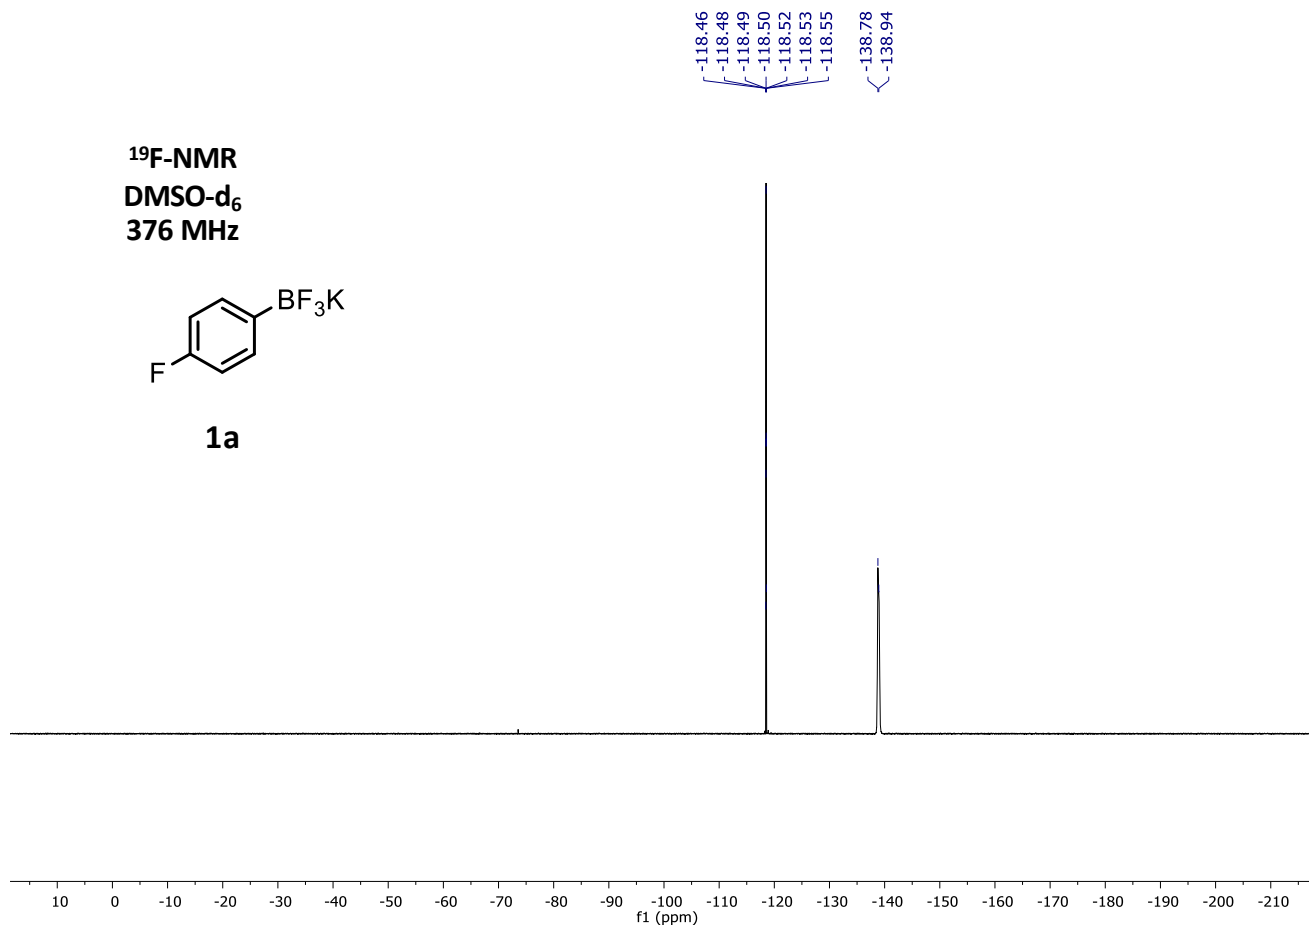

**<sup>11</sup>B-NMR**  
**DMSO-d<sub>6</sub>**  
**128 MHz**

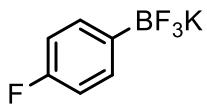

**1a**

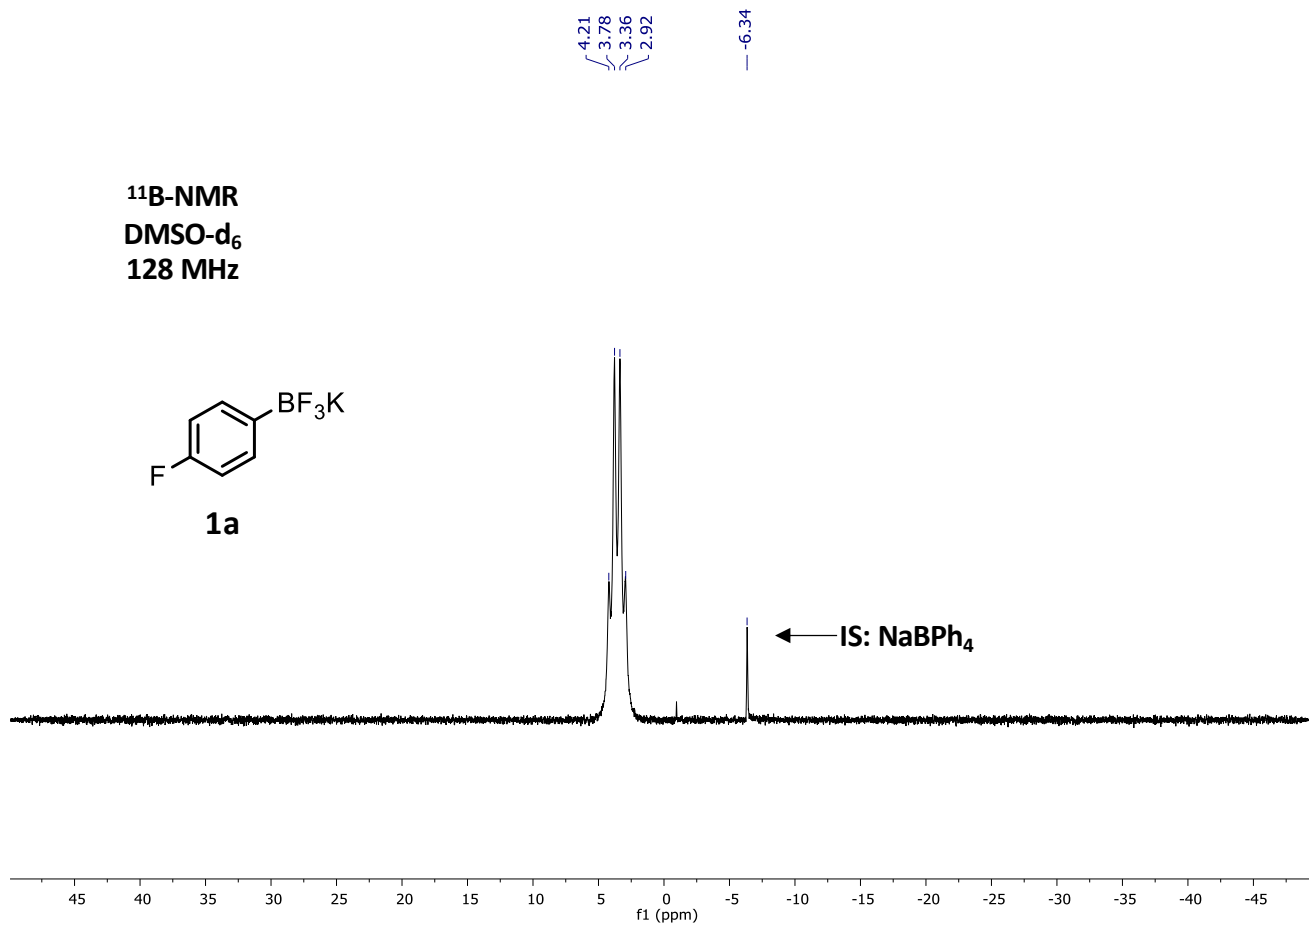

**<sup>1</sup>H-NMR**  
DMSO-d<sub>6</sub>  
400 MHz

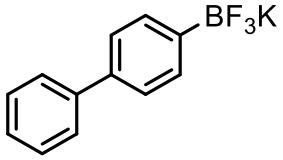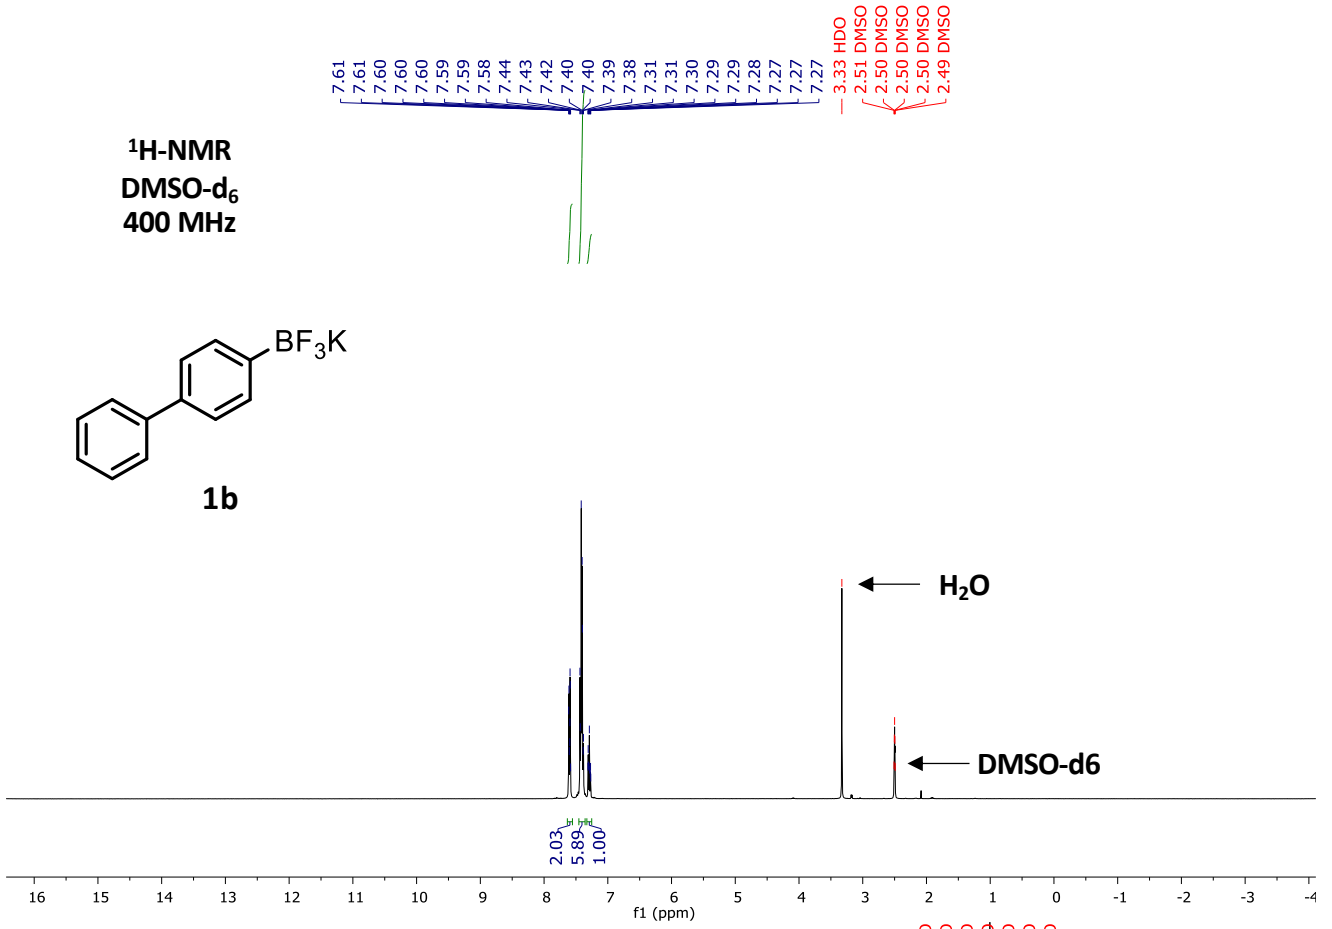

**<sup>13</sup>C{<sup>1</sup>H}-NMR**  
DMSO-d<sub>6</sub>  
101 MHz

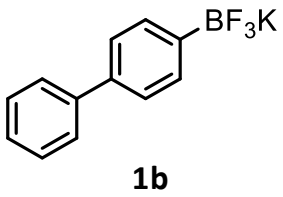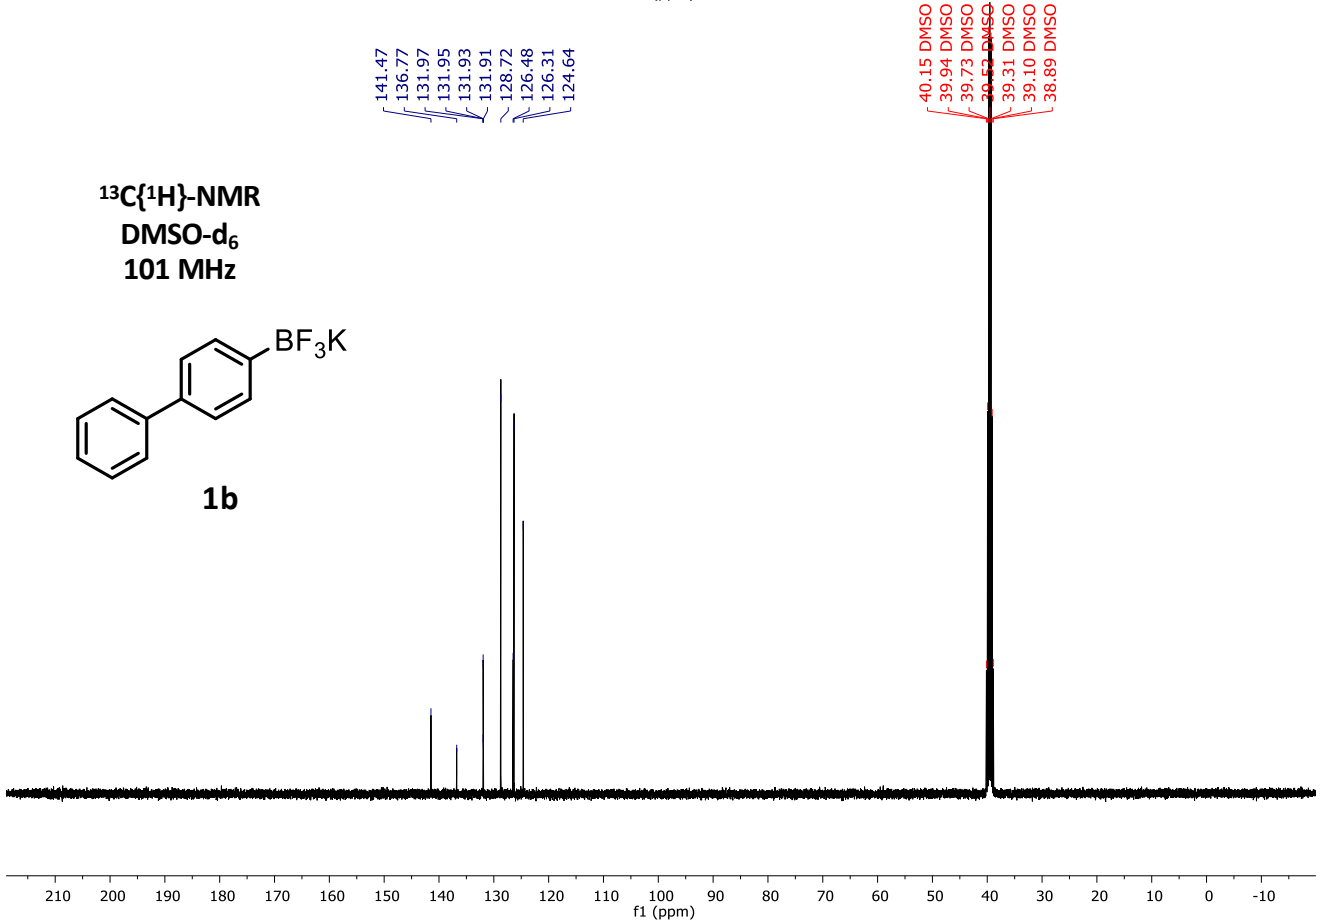

**<sup>19</sup>F-NMR**  
DMSO-d<sub>6</sub>  
376 MHz

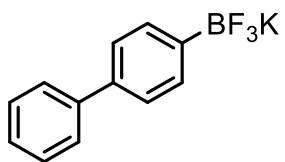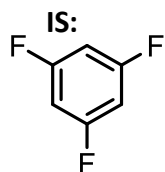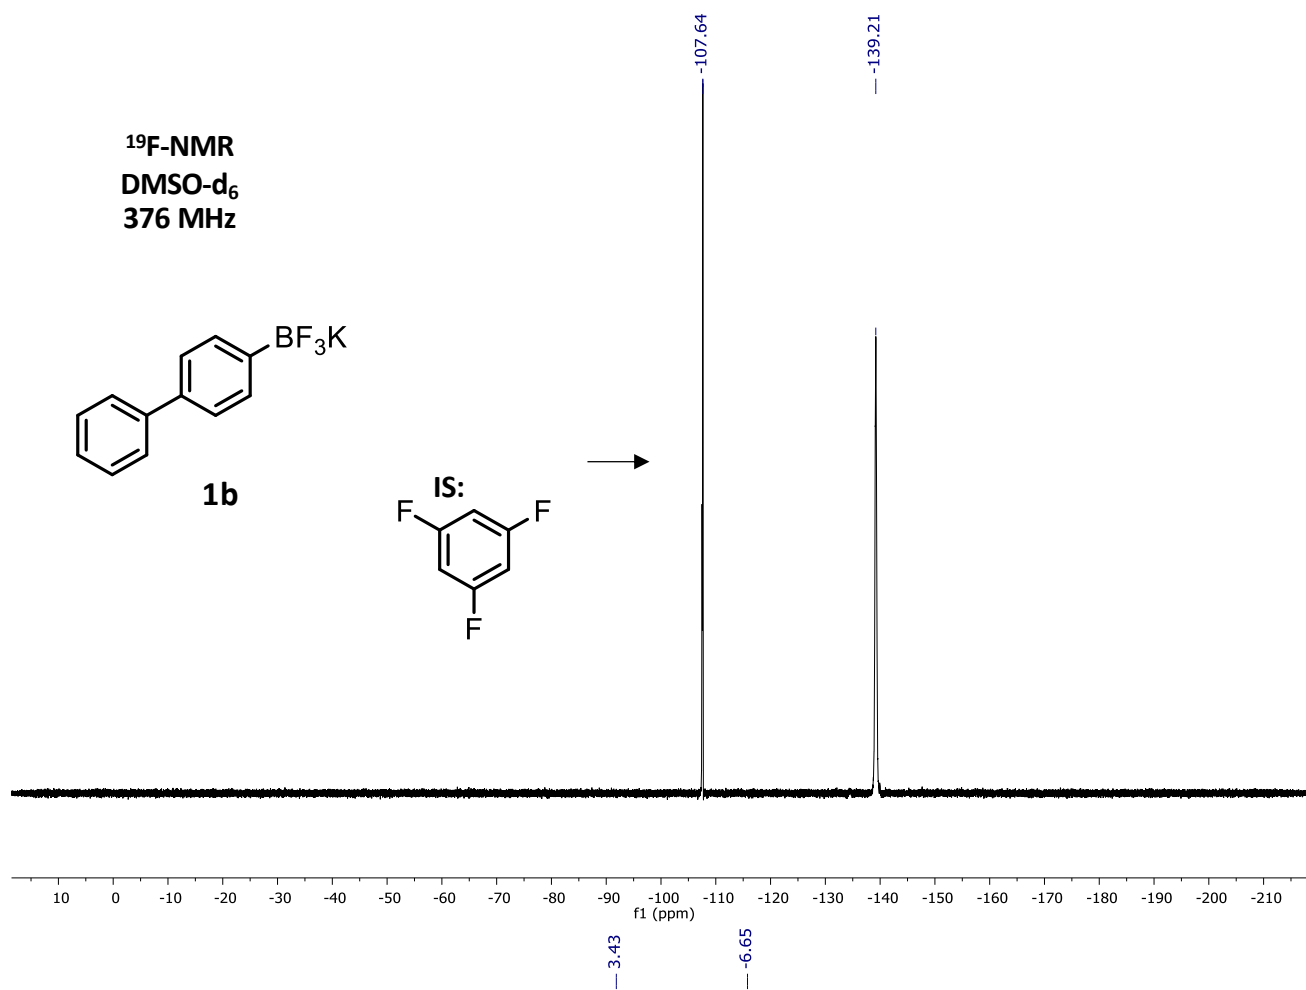

**<sup>11</sup>B-NMR**  
DMSO-d<sub>6</sub>  
128 MHz

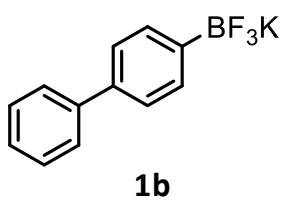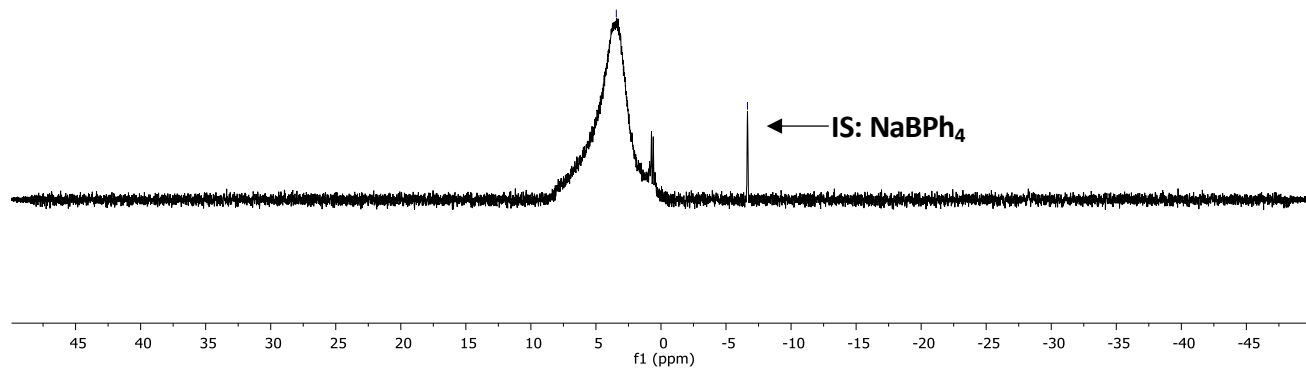

**<sup>1</sup>H-NMR**  
DMSO-d<sub>6</sub>  
400 MHz

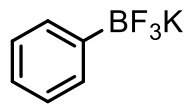

**1c**

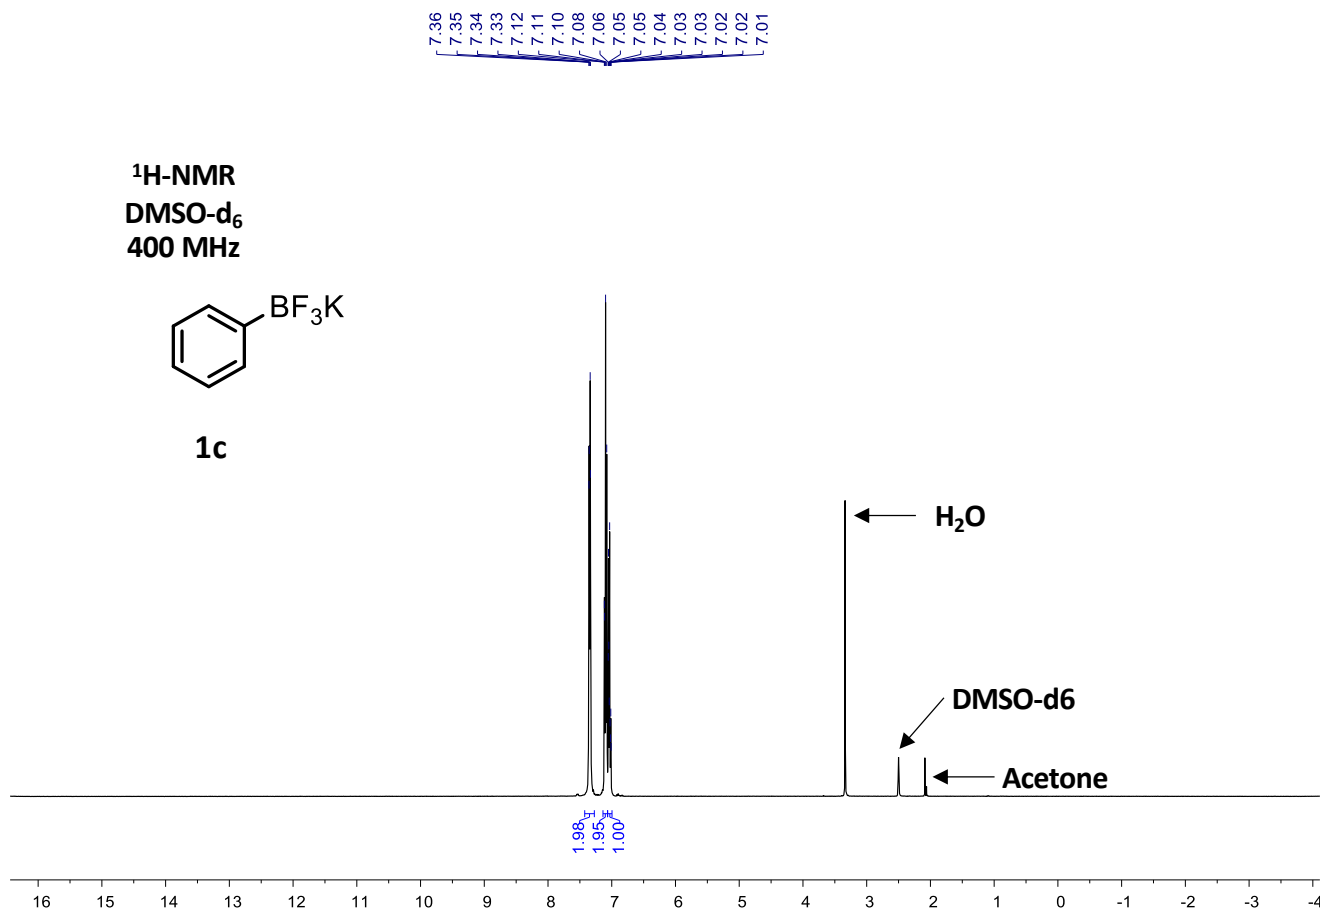

**<sup>13</sup>C{<sup>1</sup>H}-NMR**  
DMSO-d<sub>6</sub>  
101 MHz

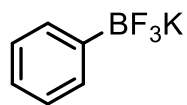

**1c**

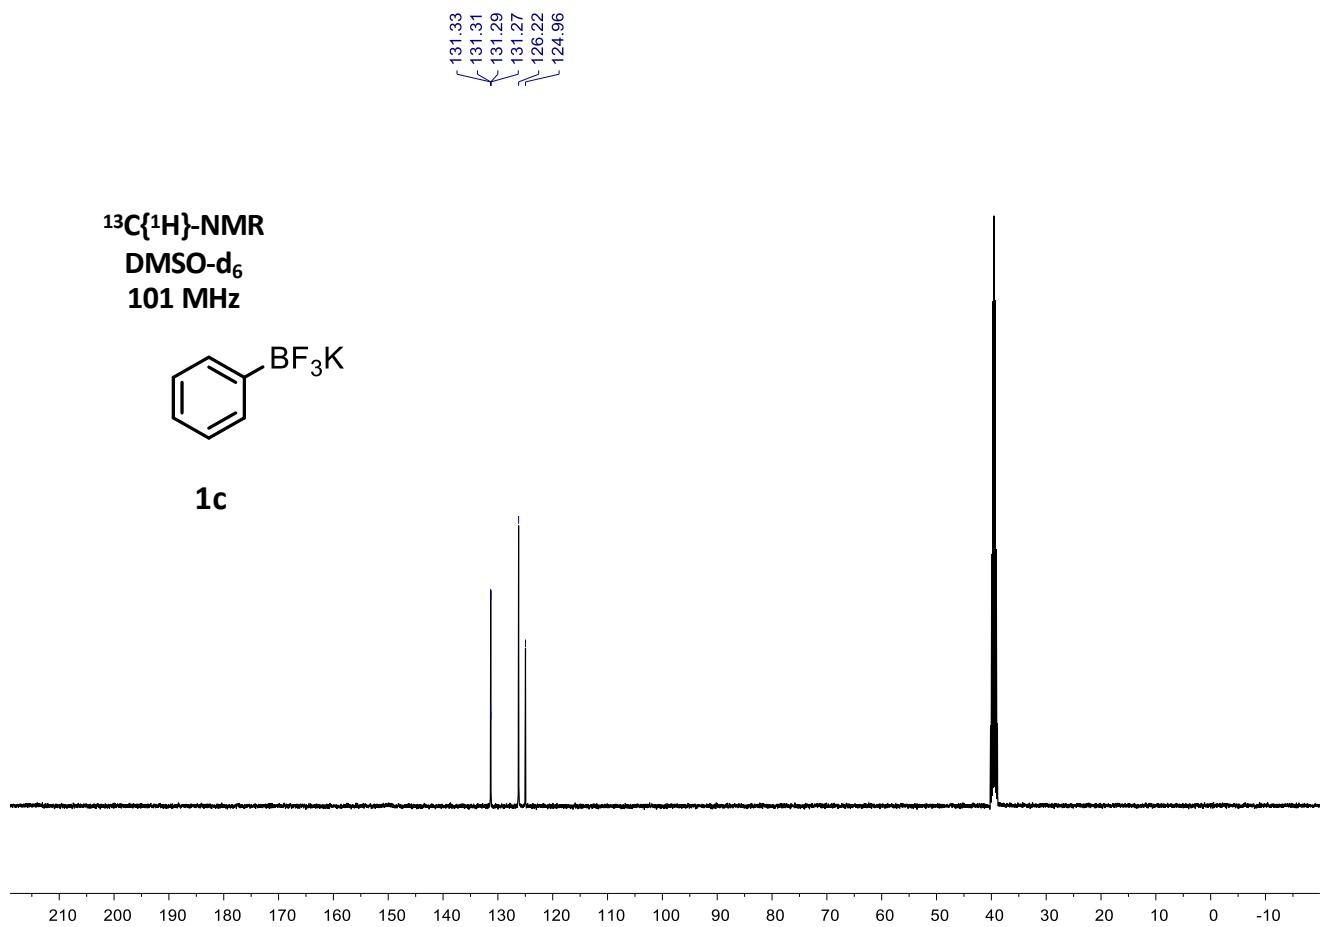

**<sup>19</sup>F-NMR**  
**DMSO-d<sub>6</sub>**  
**376 MHz**

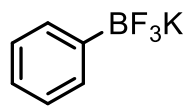

**1c**

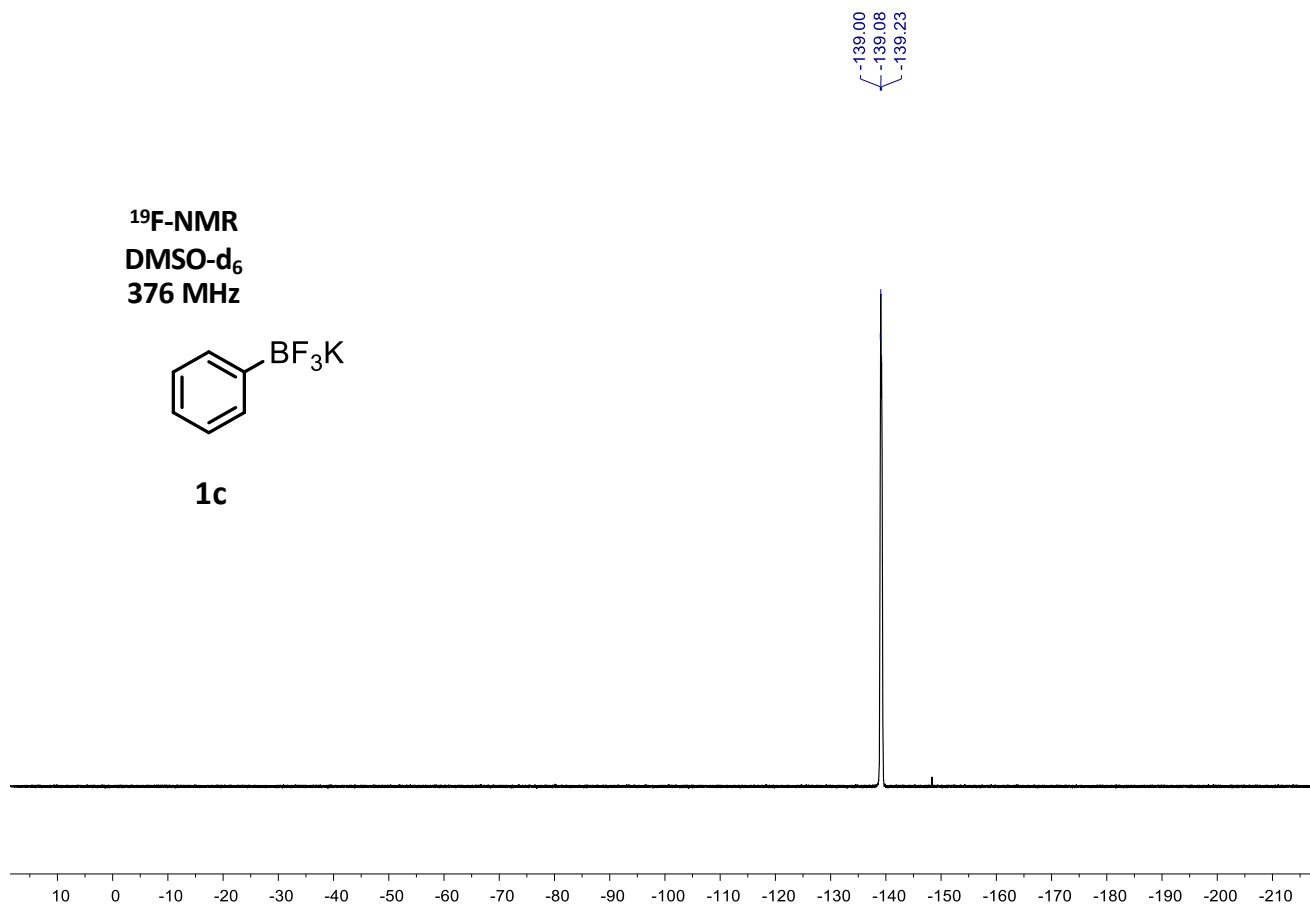

**<sup>11</sup>B-NMR**  
**DMSO-d<sub>6</sub>**  
**128 MHz**

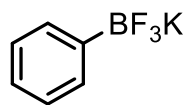

**1c**

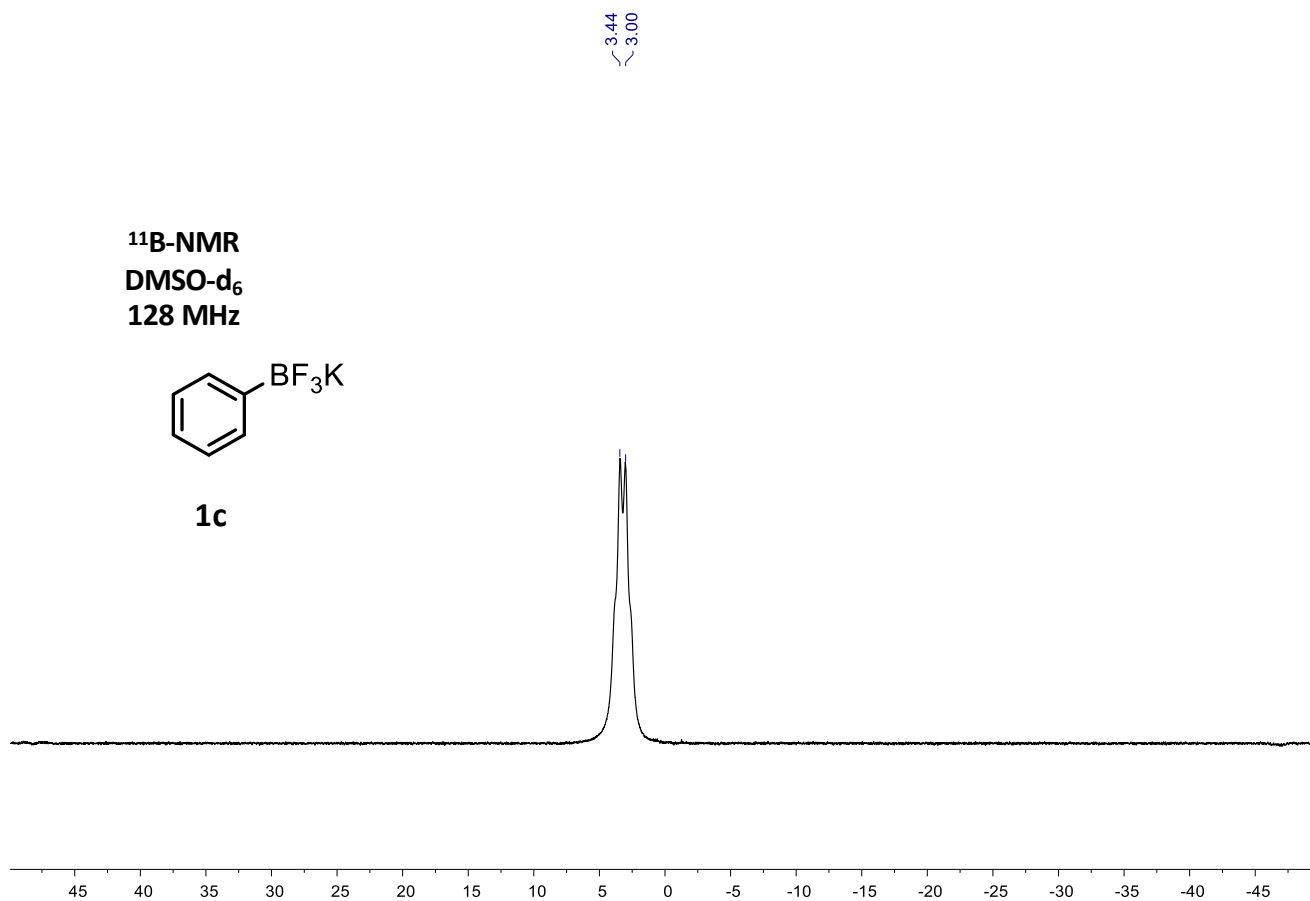

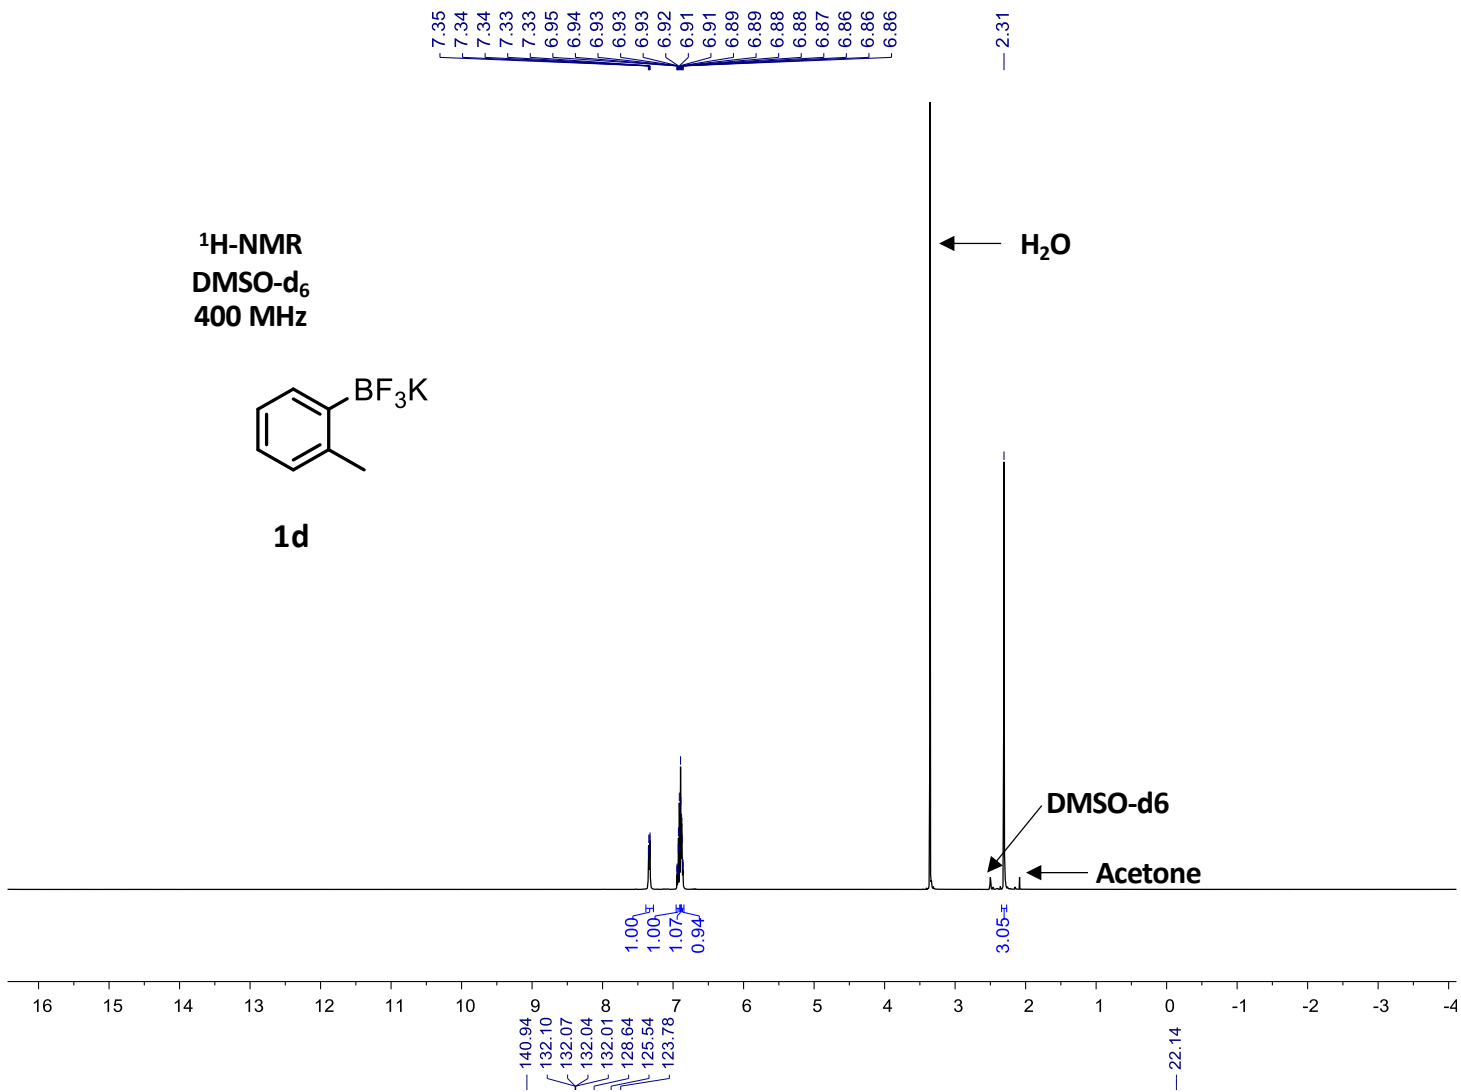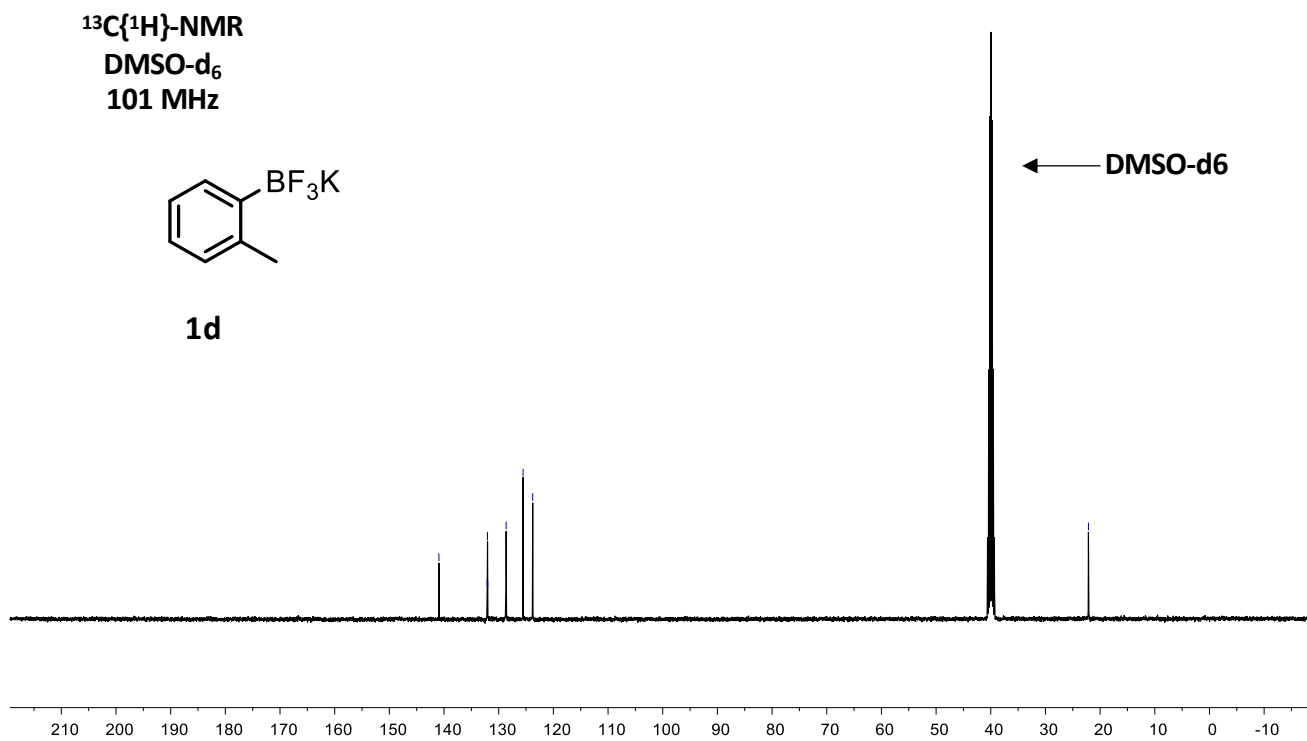

**<sup>19</sup>F-NMR**  
**DMSO-d<sub>6</sub>**  
**376 MHz**

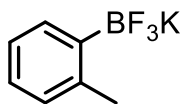

**1d**

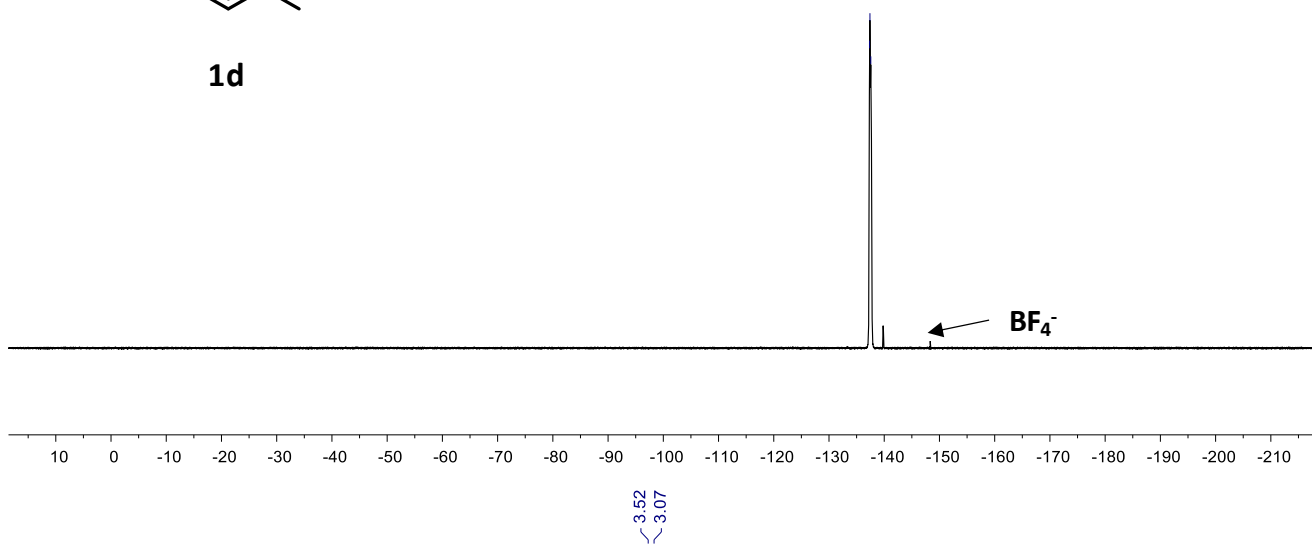

**<sup>11</sup>B-NMR**  
**DMSO-d<sub>6</sub>**  
**128 MHz**

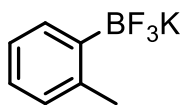

**1d**

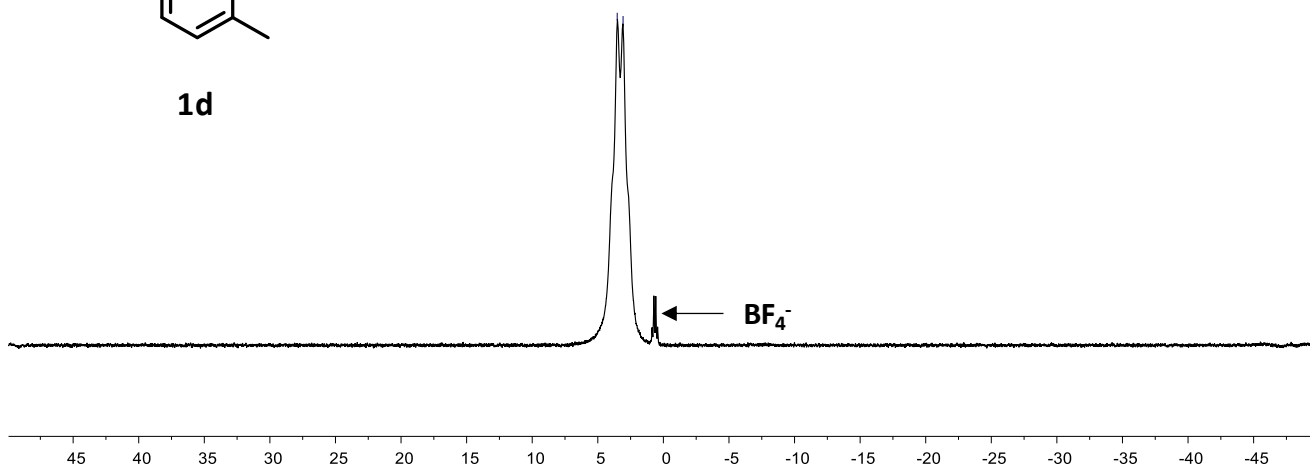



**<sup>1</sup>H-NMR**  
DMSO-d<sub>6</sub>  
400 MHz

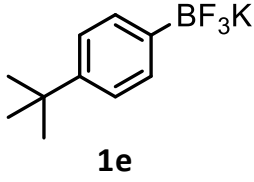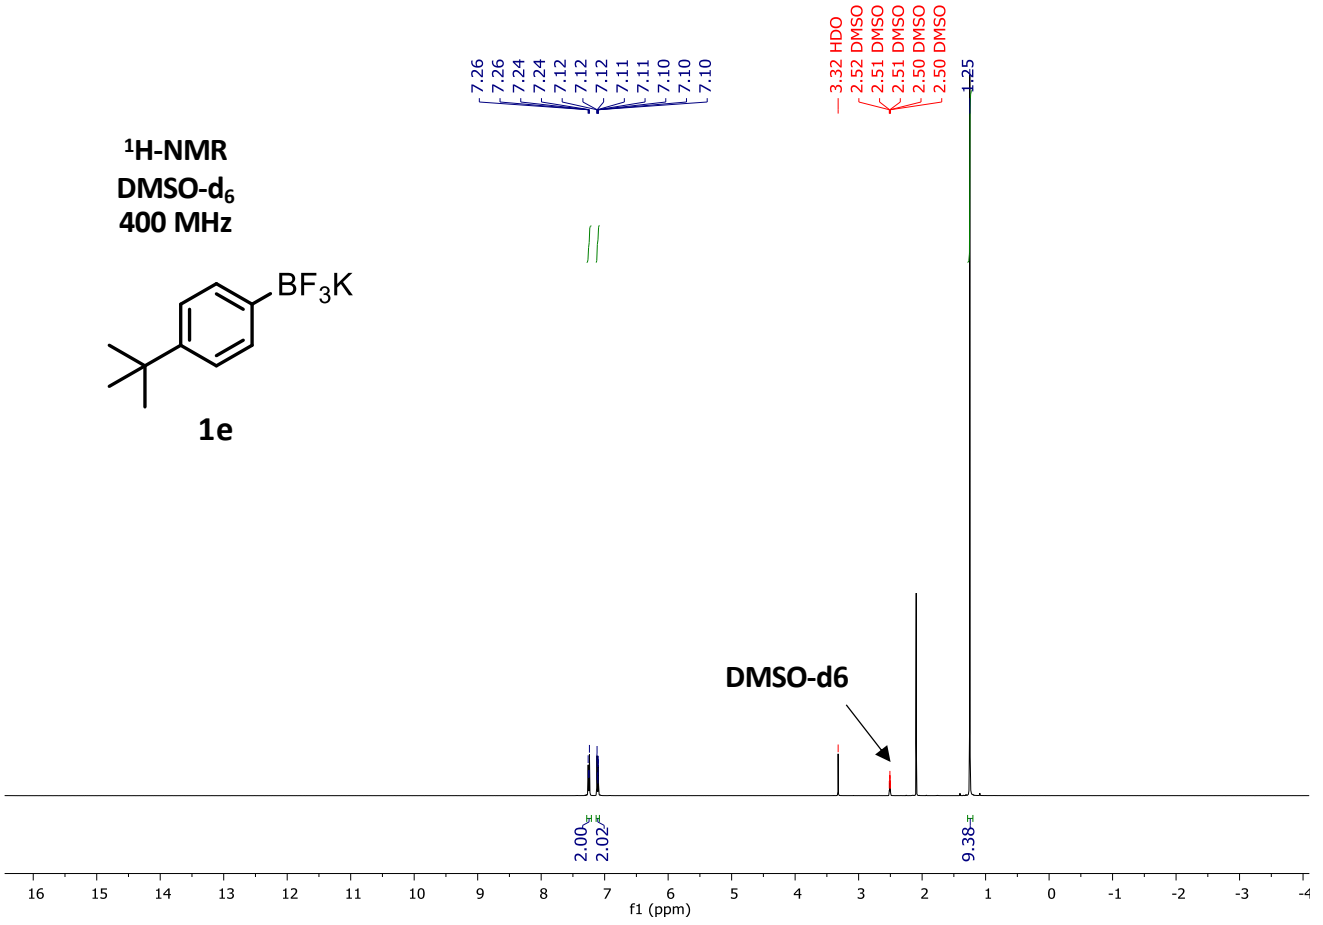

**<sup>13</sup>C{<sup>1</sup>H}-NMR**  
DMSO-d<sub>6</sub>  
101 MHz

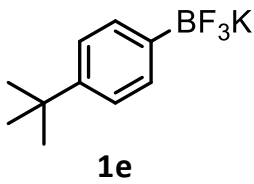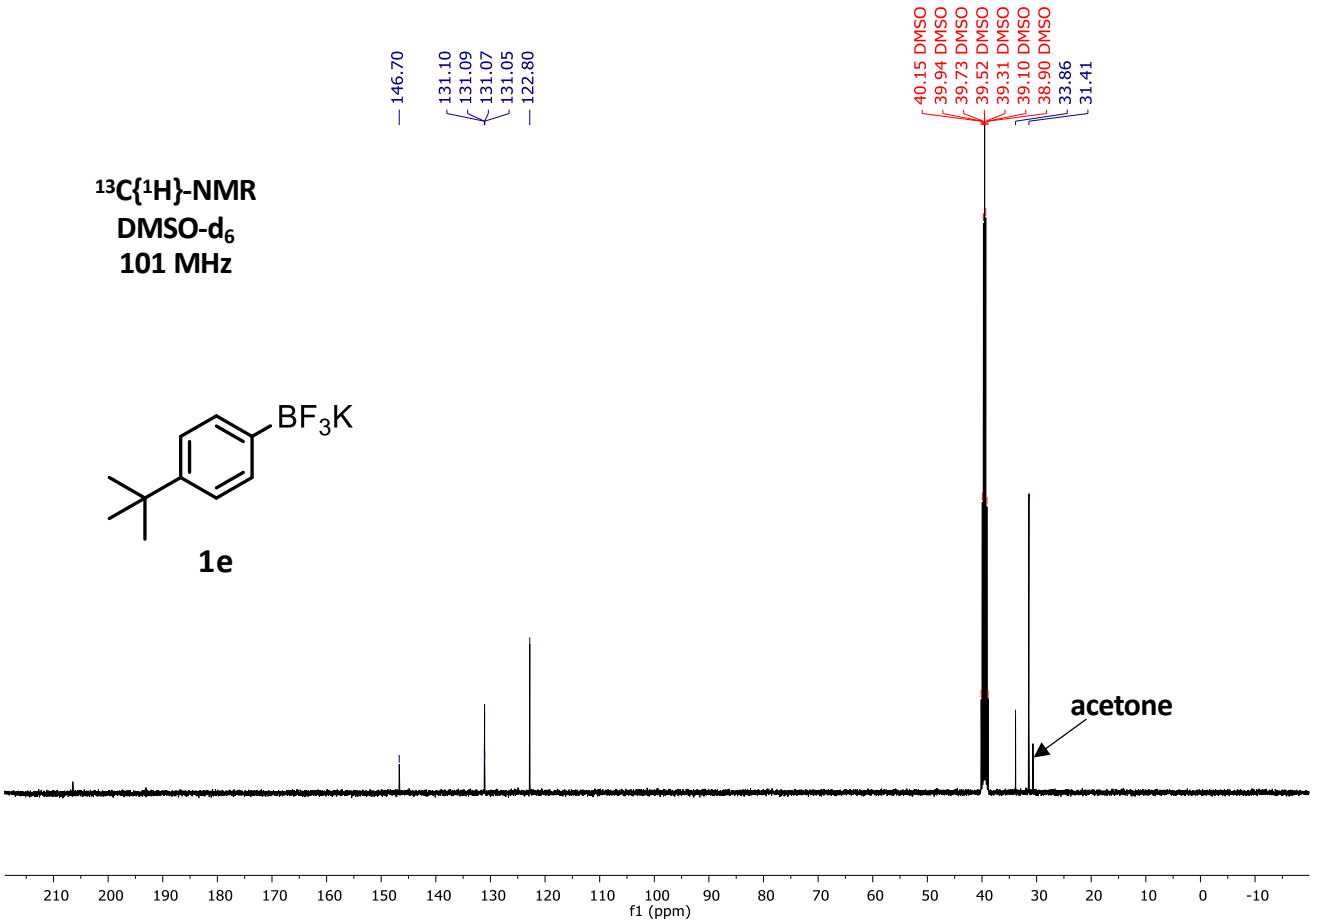

**<sup>19</sup>F-NMR**  
**DMSO-d<sub>6</sub>**  
**376 MHz**

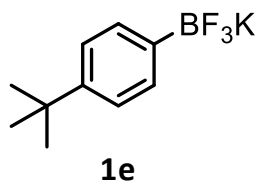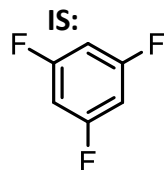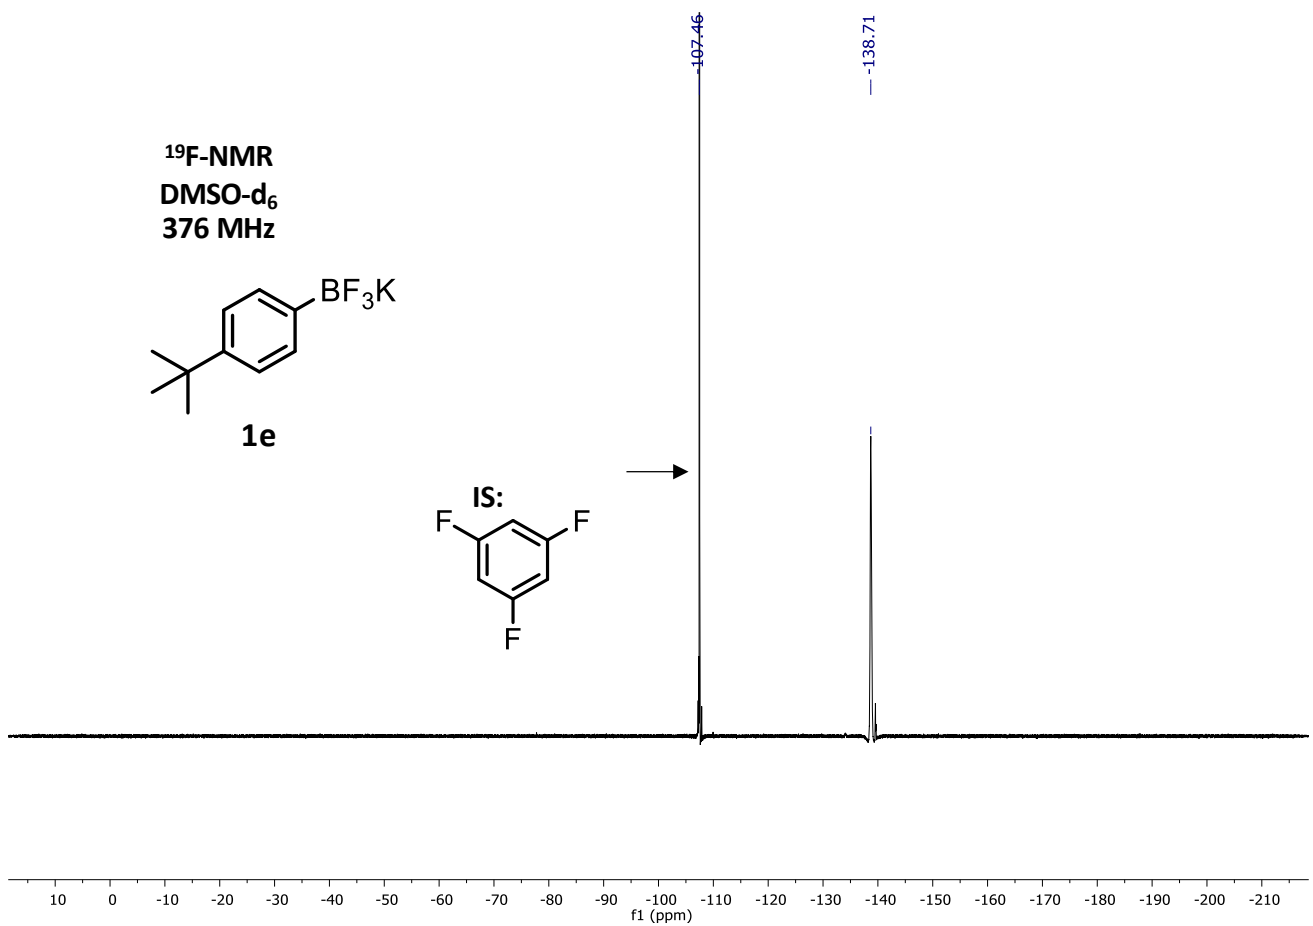

**<sup>1</sup>H-NMR**  
DMSO-d<sub>6</sub>  
400 MHz

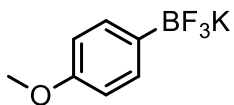

**1f**

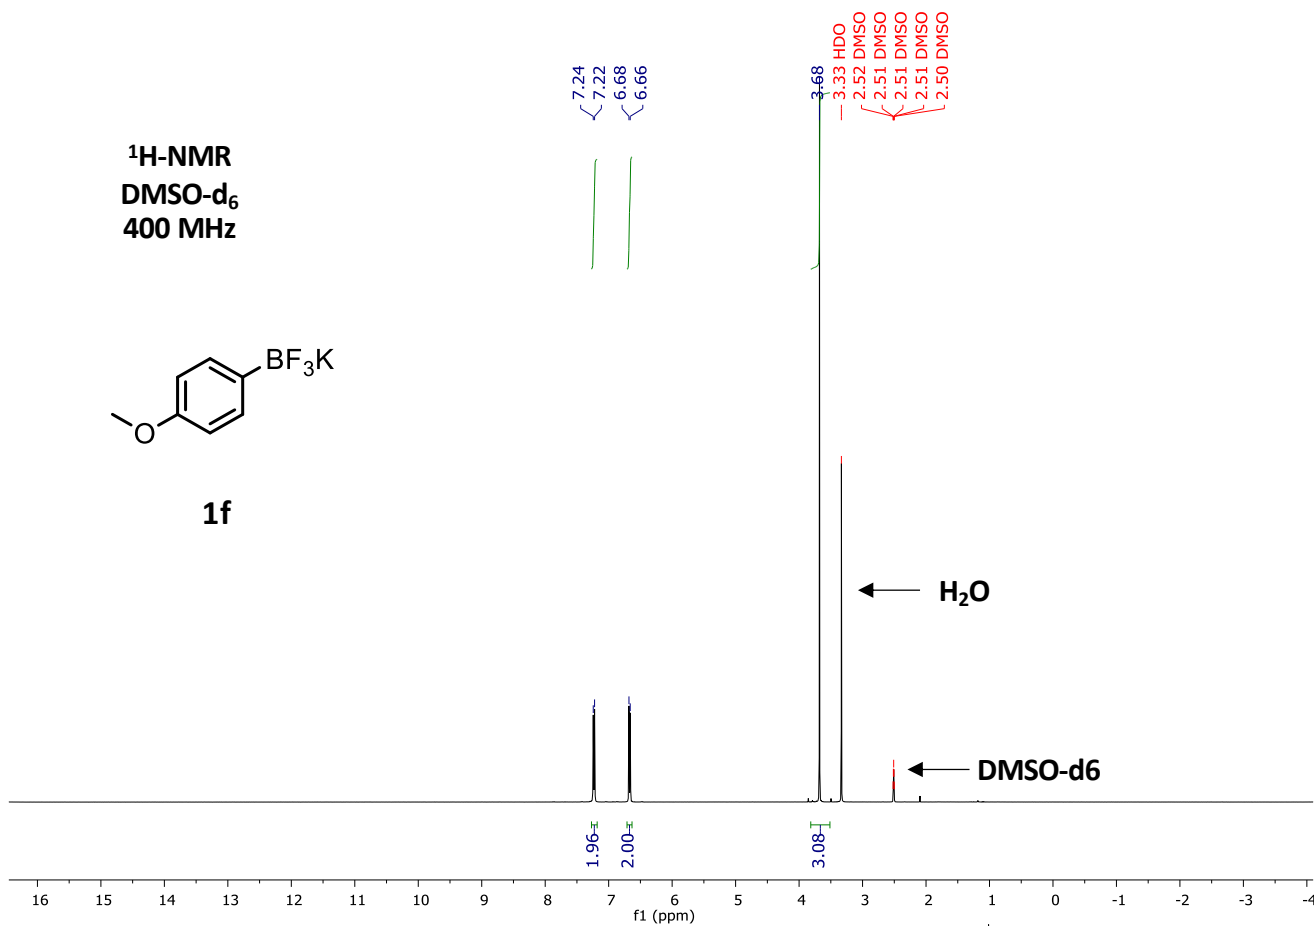

**<sup>13</sup>C{<sup>1</sup>H}-NMR**  
DMSO-d<sub>6</sub>  
101 MHz

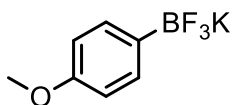

**1f**

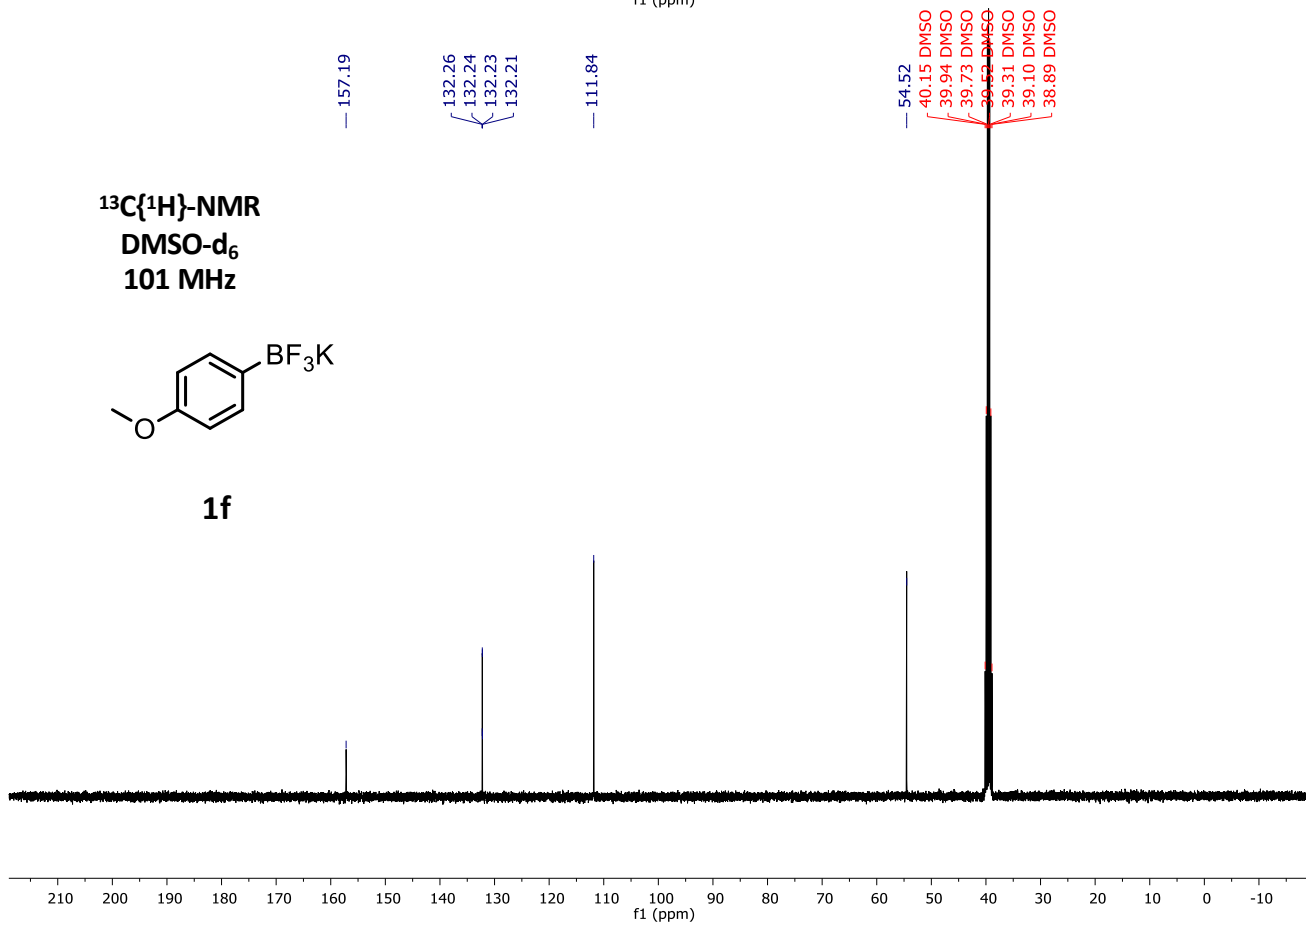

**<sup>19</sup>F-NMR**  
**DMSO-d<sub>6</sub>**  
**376 MHz**

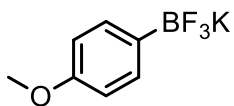

**1f**

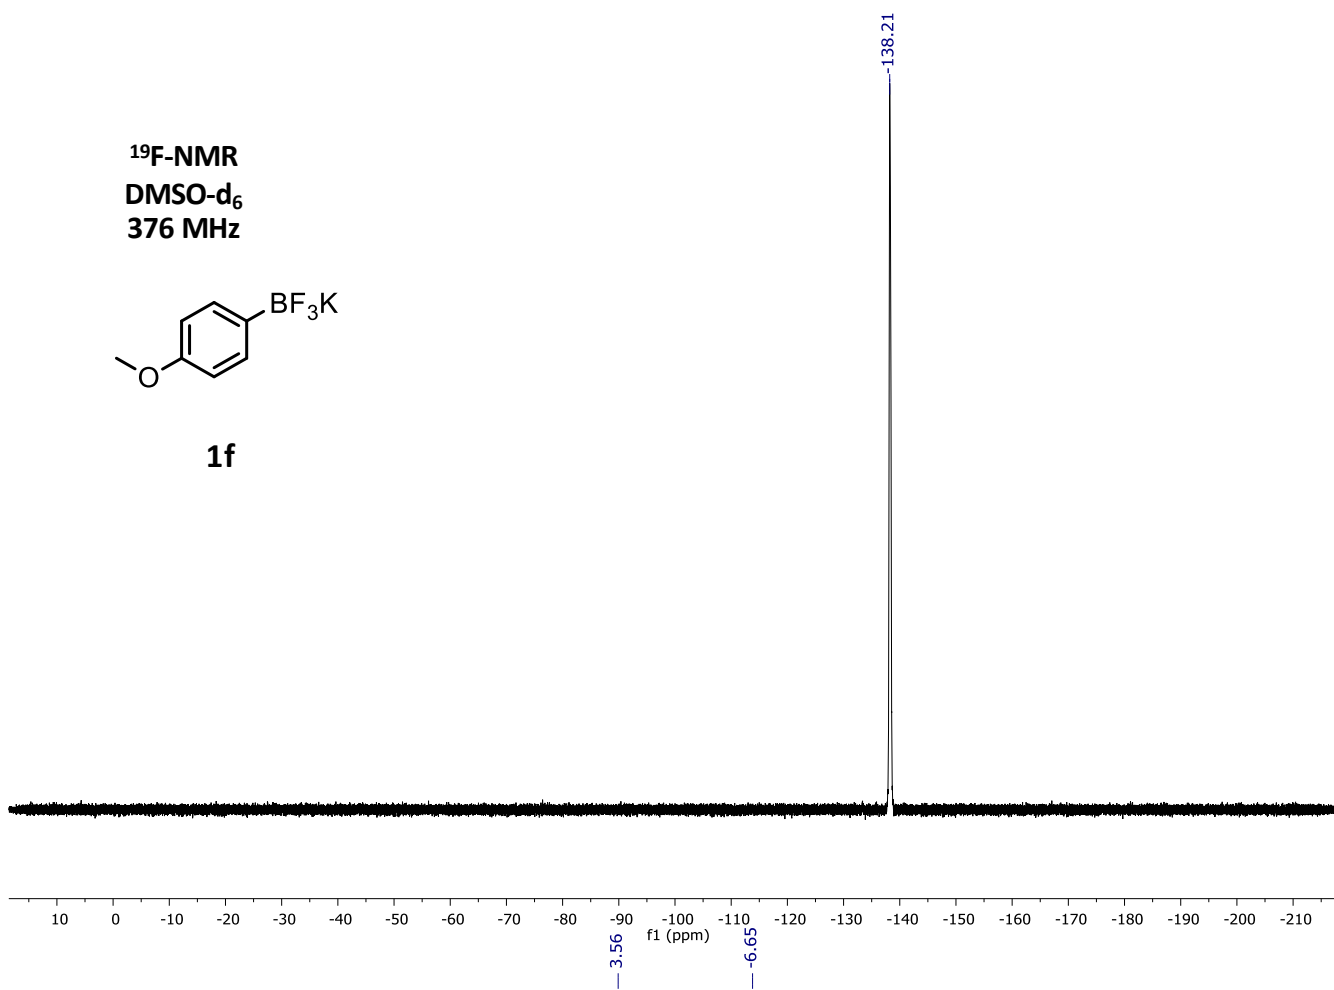

**<sup>11</sup>B-NMR**  
**DMSO-d<sub>6</sub>**  
**128 MHz**

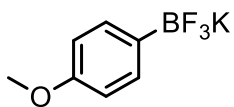

**1f**

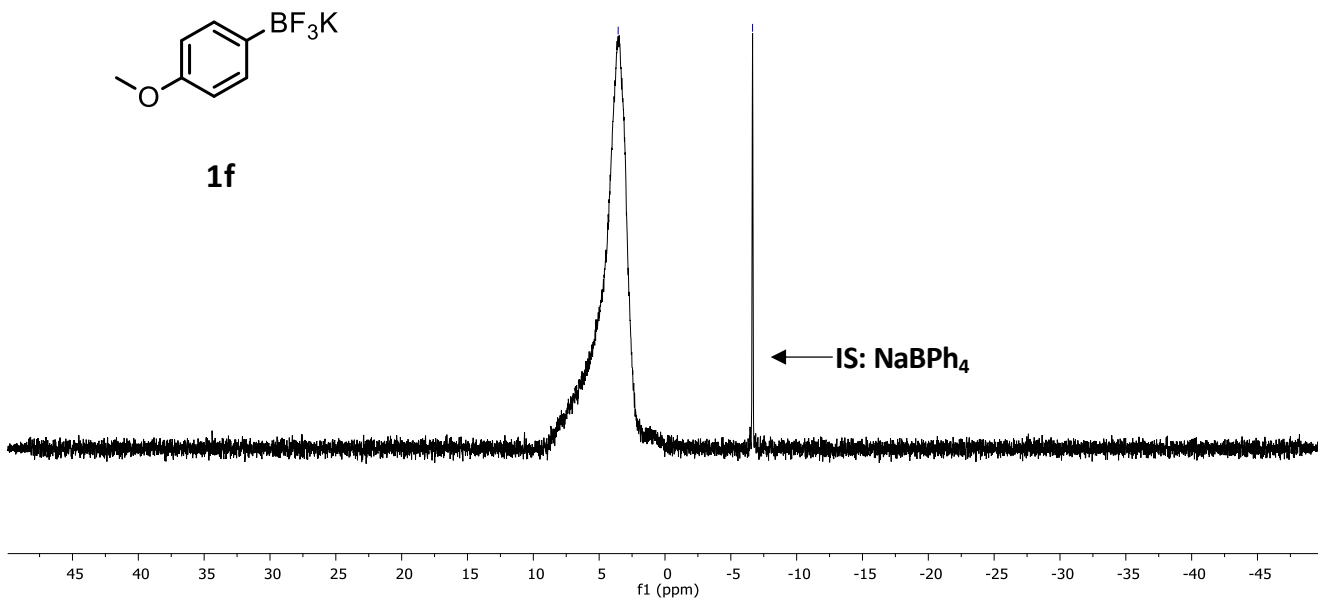

<sup>1</sup>H-NMR  
MeCN-d<sub>3</sub>  
400 MHz

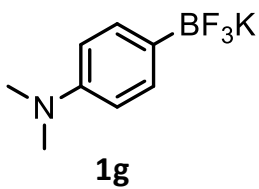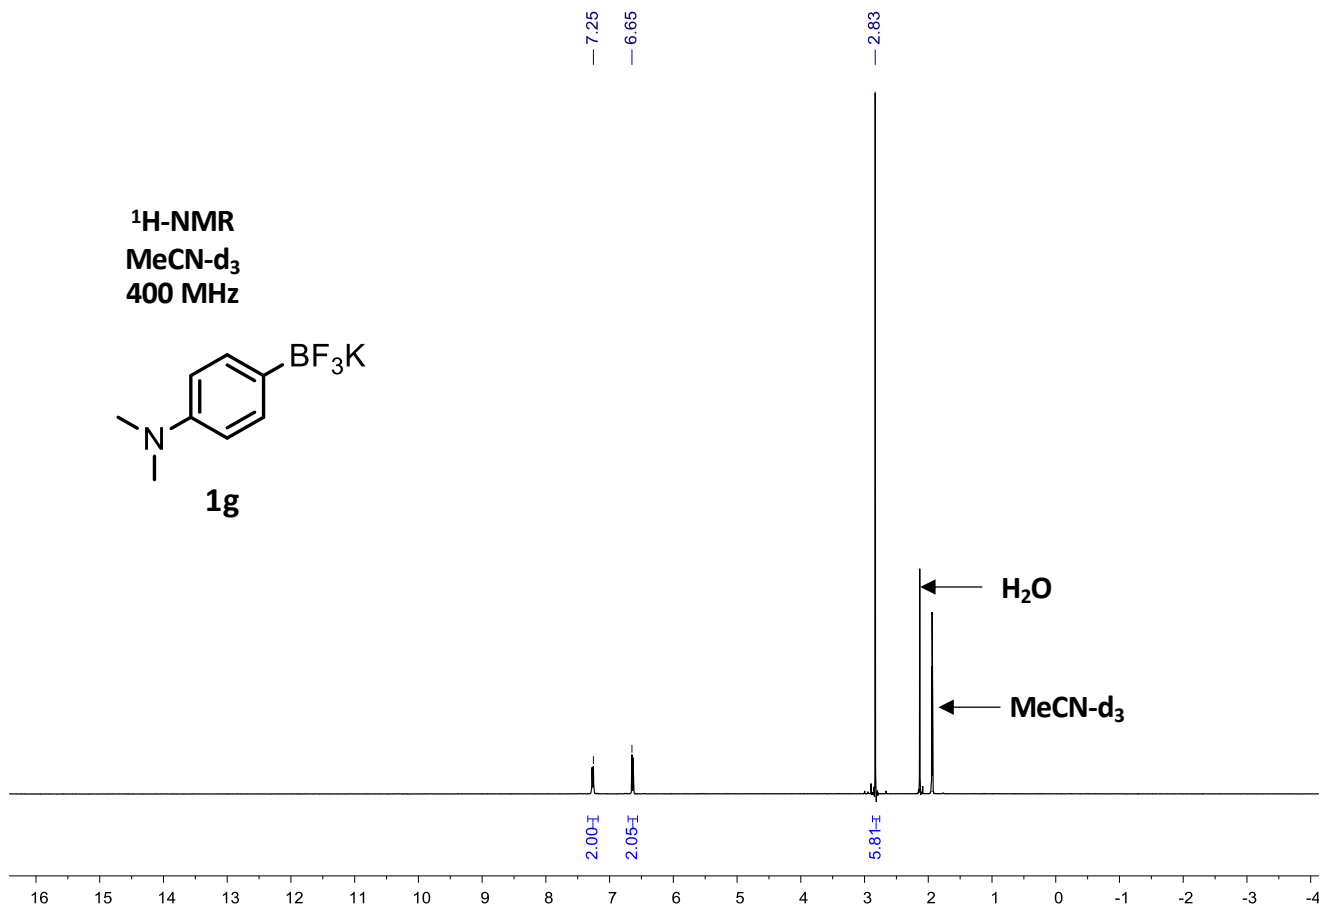

<sup>13</sup>C{<sup>1</sup>H}-NMR  
MeCN-d<sub>3</sub>  
101 Hz

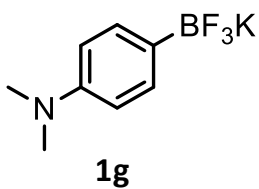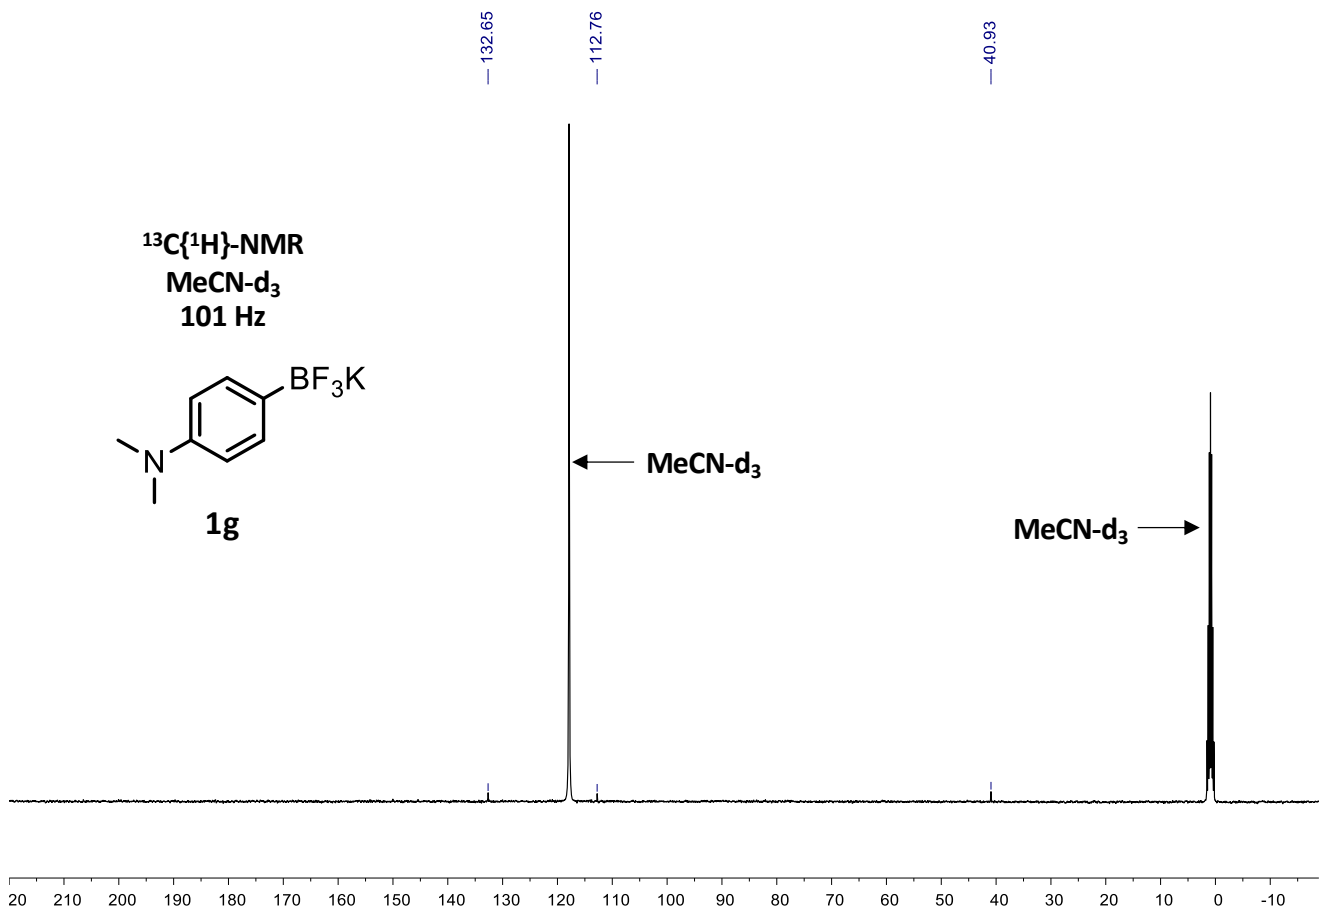

<sup>19</sup>F-NMR  
MeCN-d<sub>3</sub>  
376 MHz

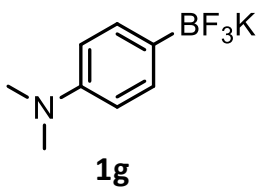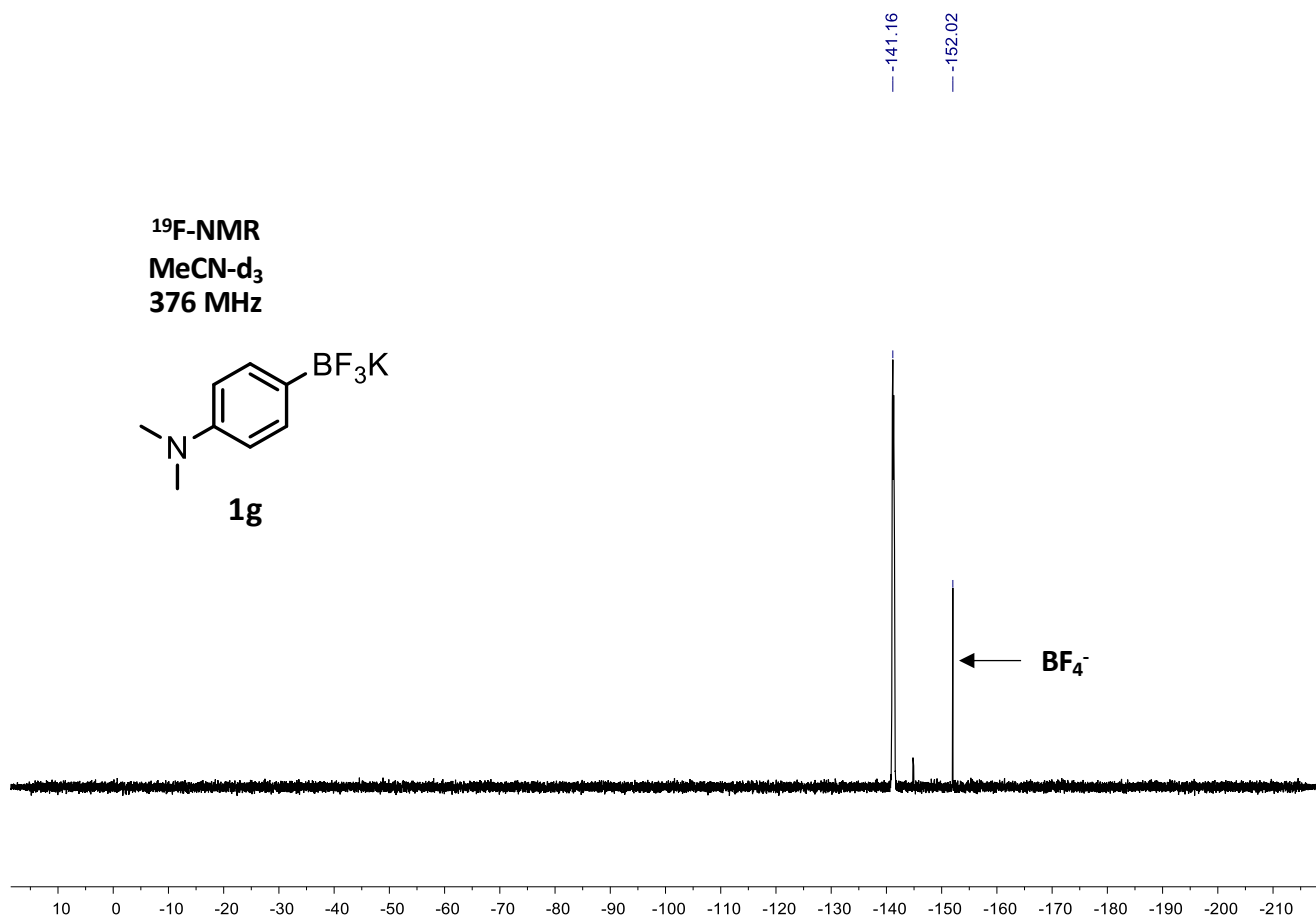

<sup>11</sup>B-NMR  
MeCN-d<sub>3</sub>  
128 Hz

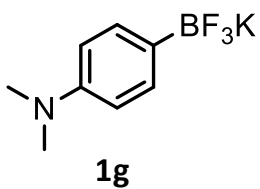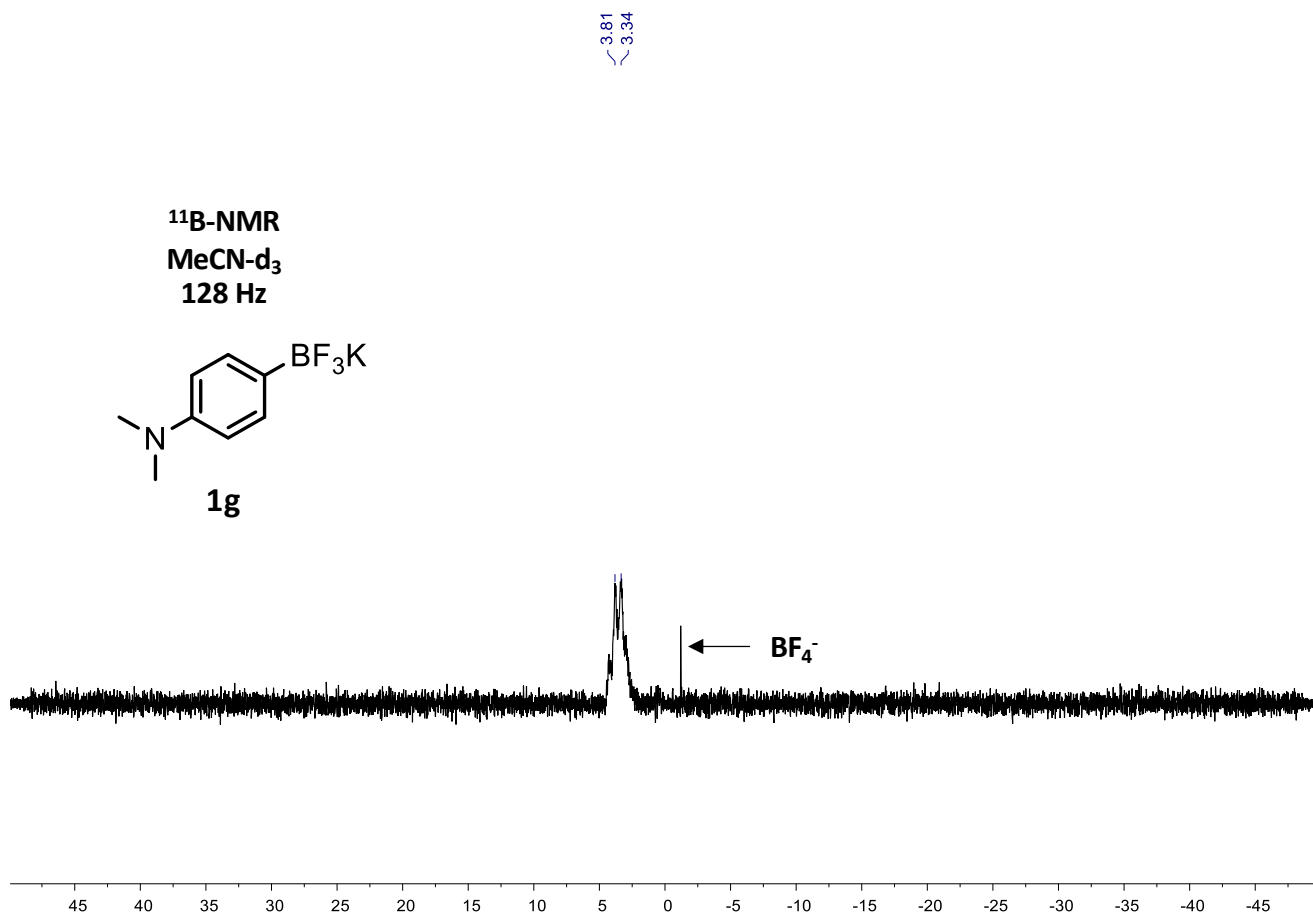

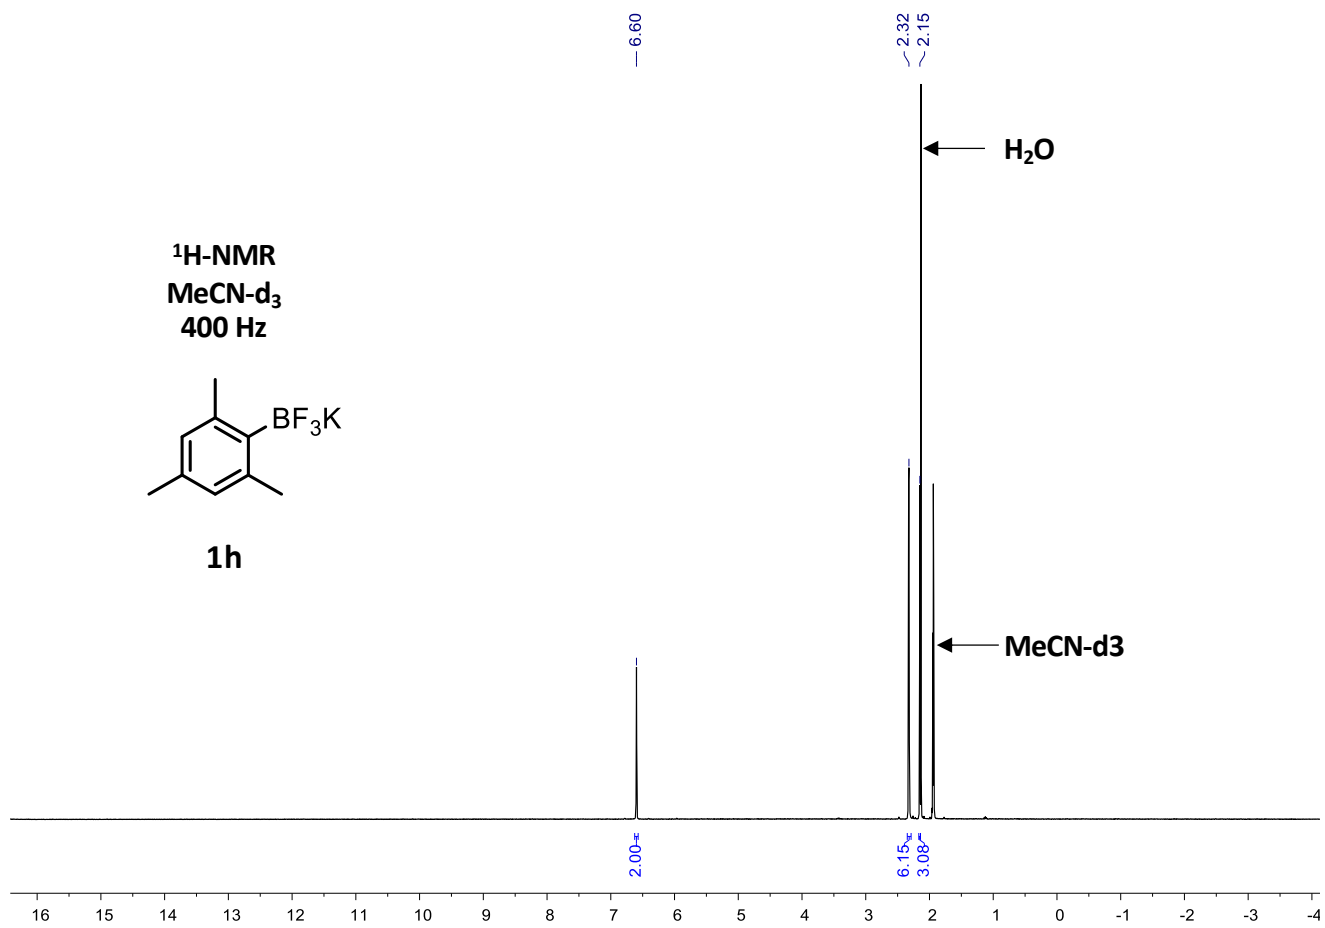

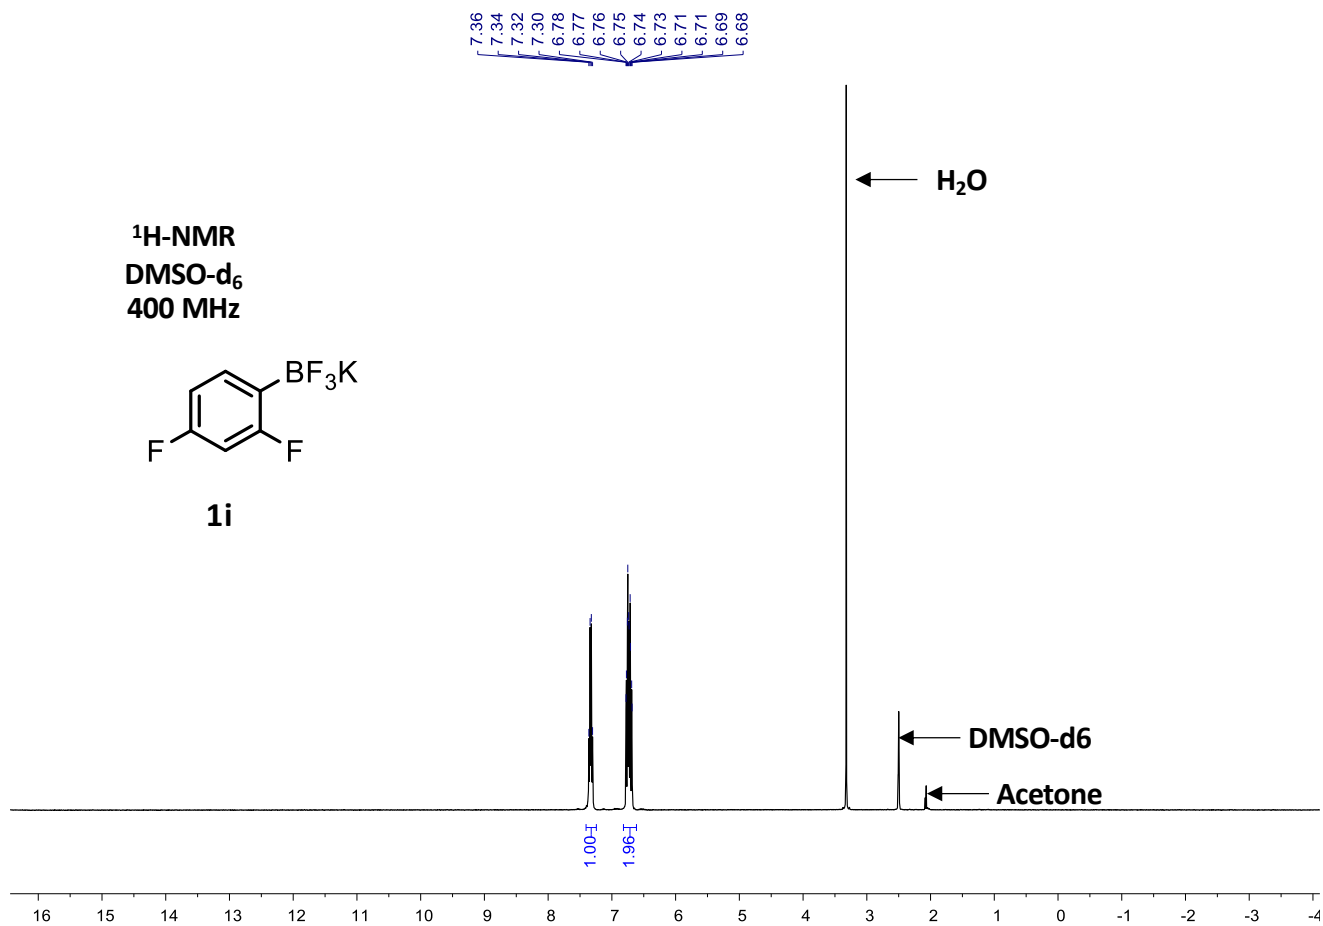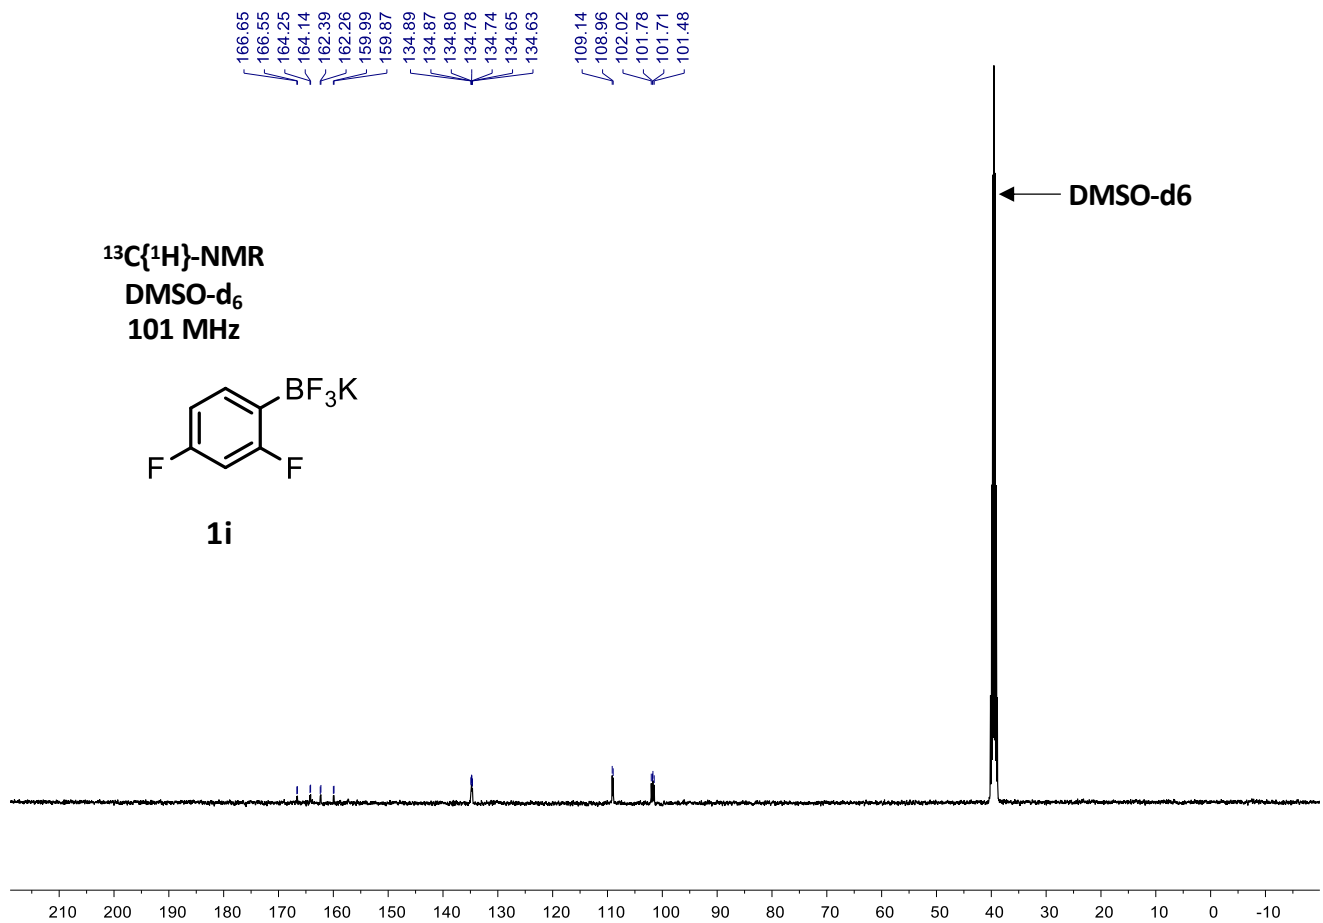



**<sup>19</sup>F-NMR**  
**DMSO-d<sub>6</sub>**  
**376 MHz**

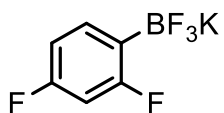

**1i**

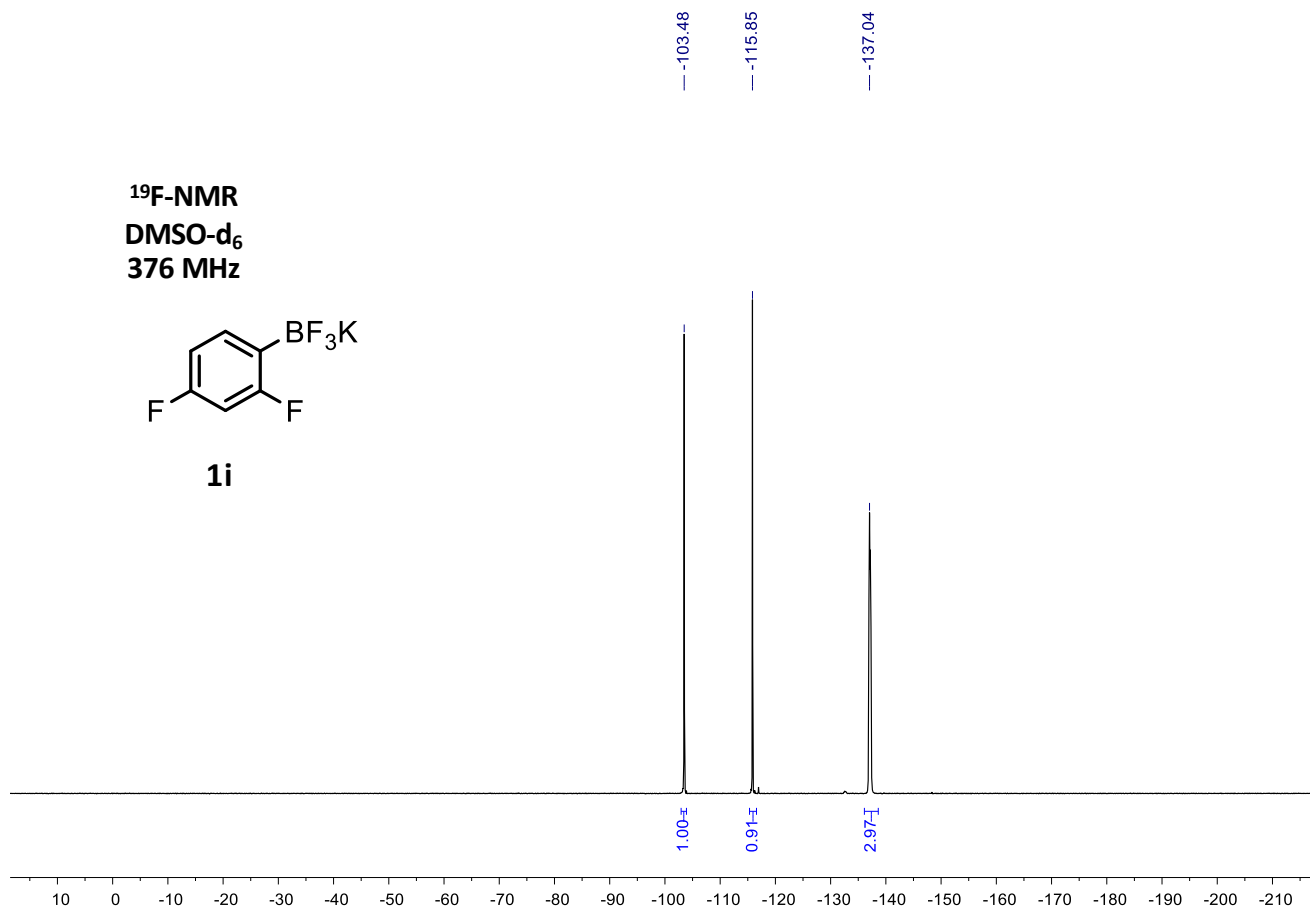

**<sup>11</sup>B-NMR**  
**DMSO-d<sub>6</sub>**  
**128 MHz**

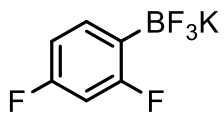

**1i**

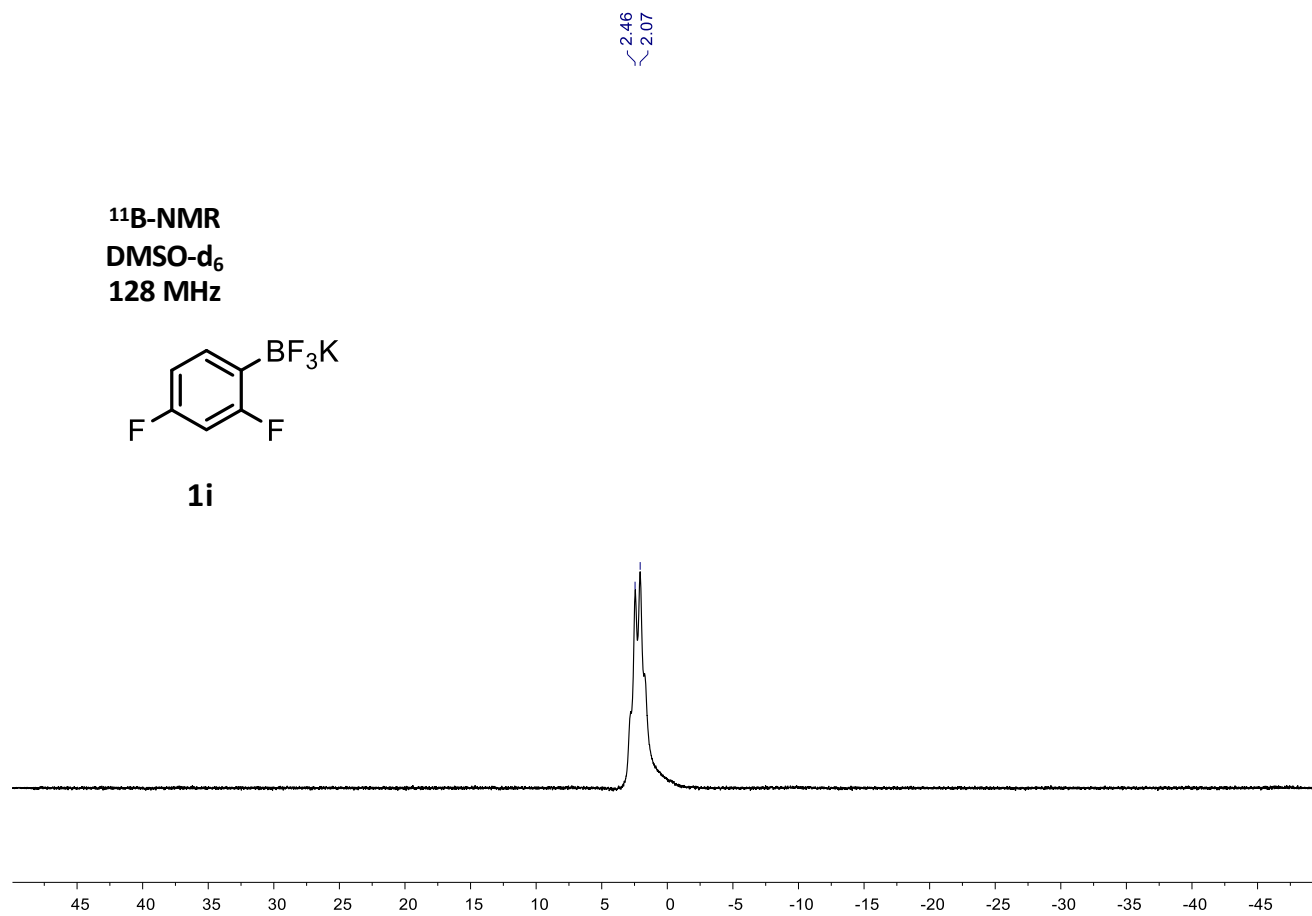

**<sup>1</sup>H-NMR**  
DMSO-d<sub>6</sub>  
400 MHz

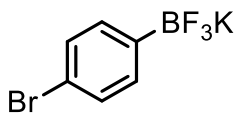

**1j**

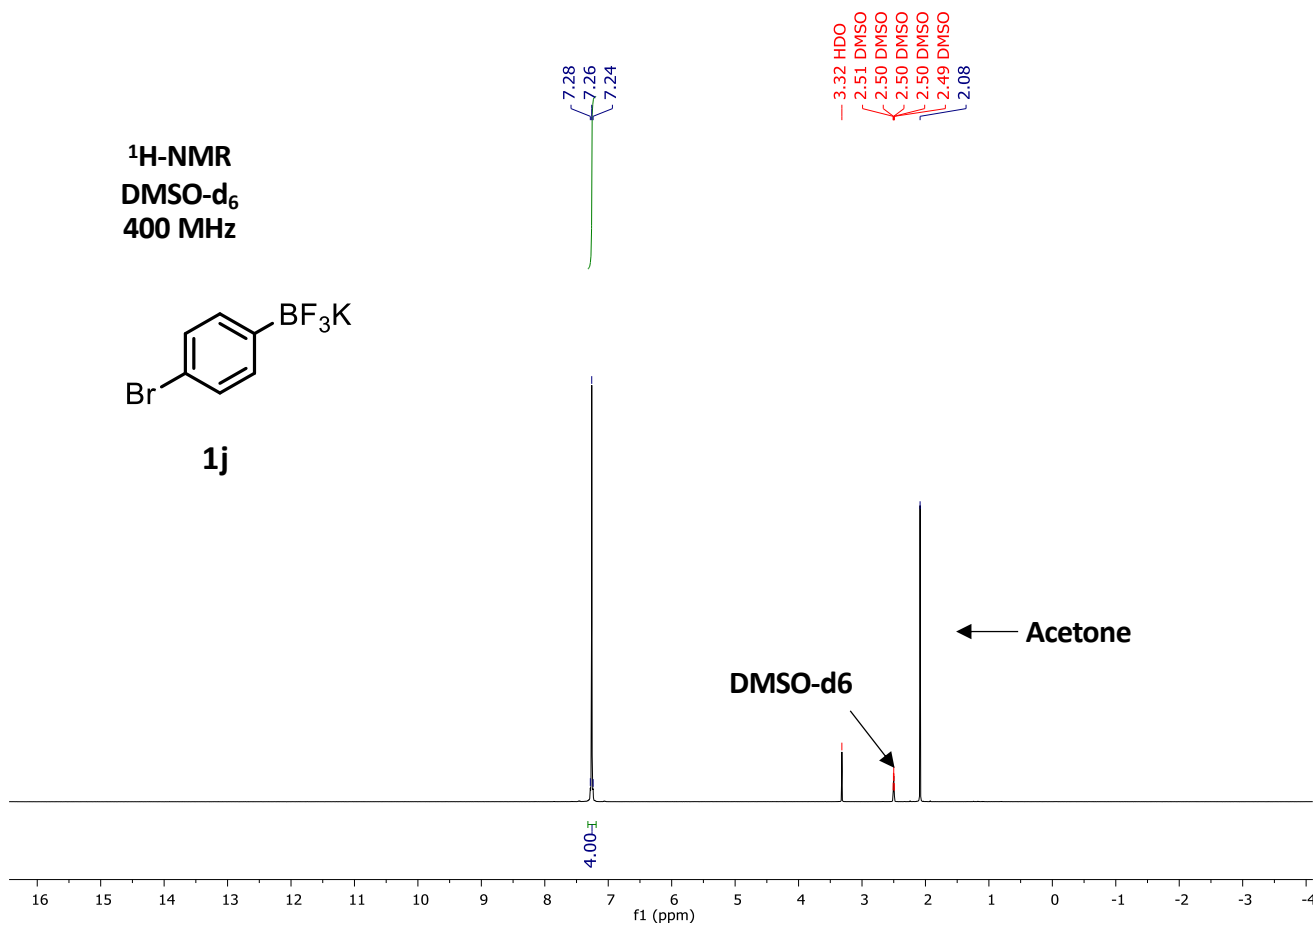

**<sup>13</sup>C{<sup>1</sup>H}-NMR**  
DMSO-d<sub>6</sub>  
101 MHz

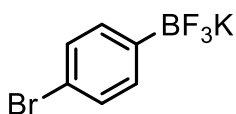

**1j**

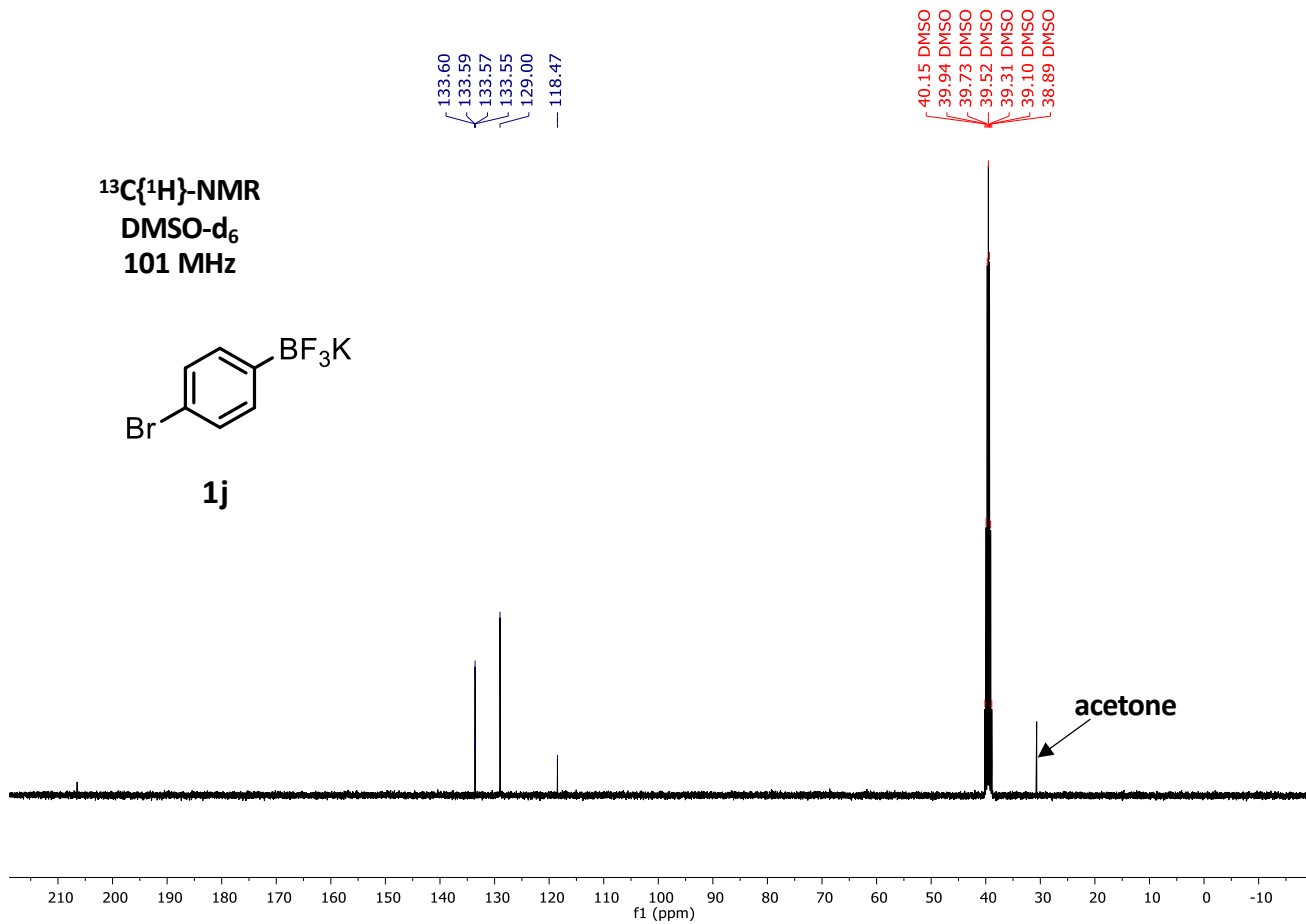

**<sup>19</sup>F-NMR**  
**DMSO-d<sub>6</sub>**  
**376 MHz**

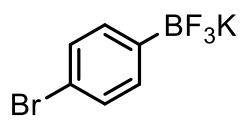

**1j**

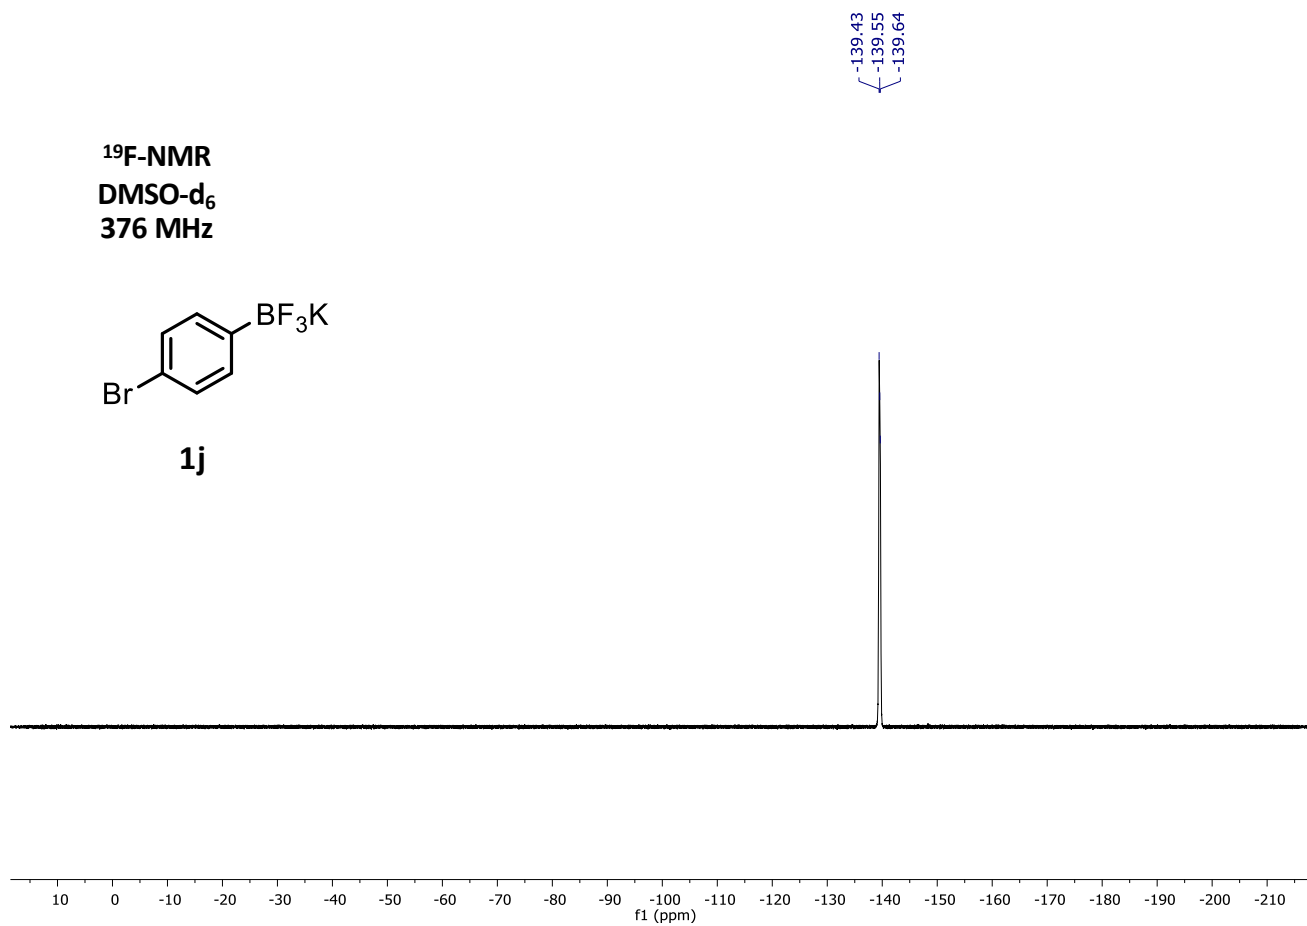

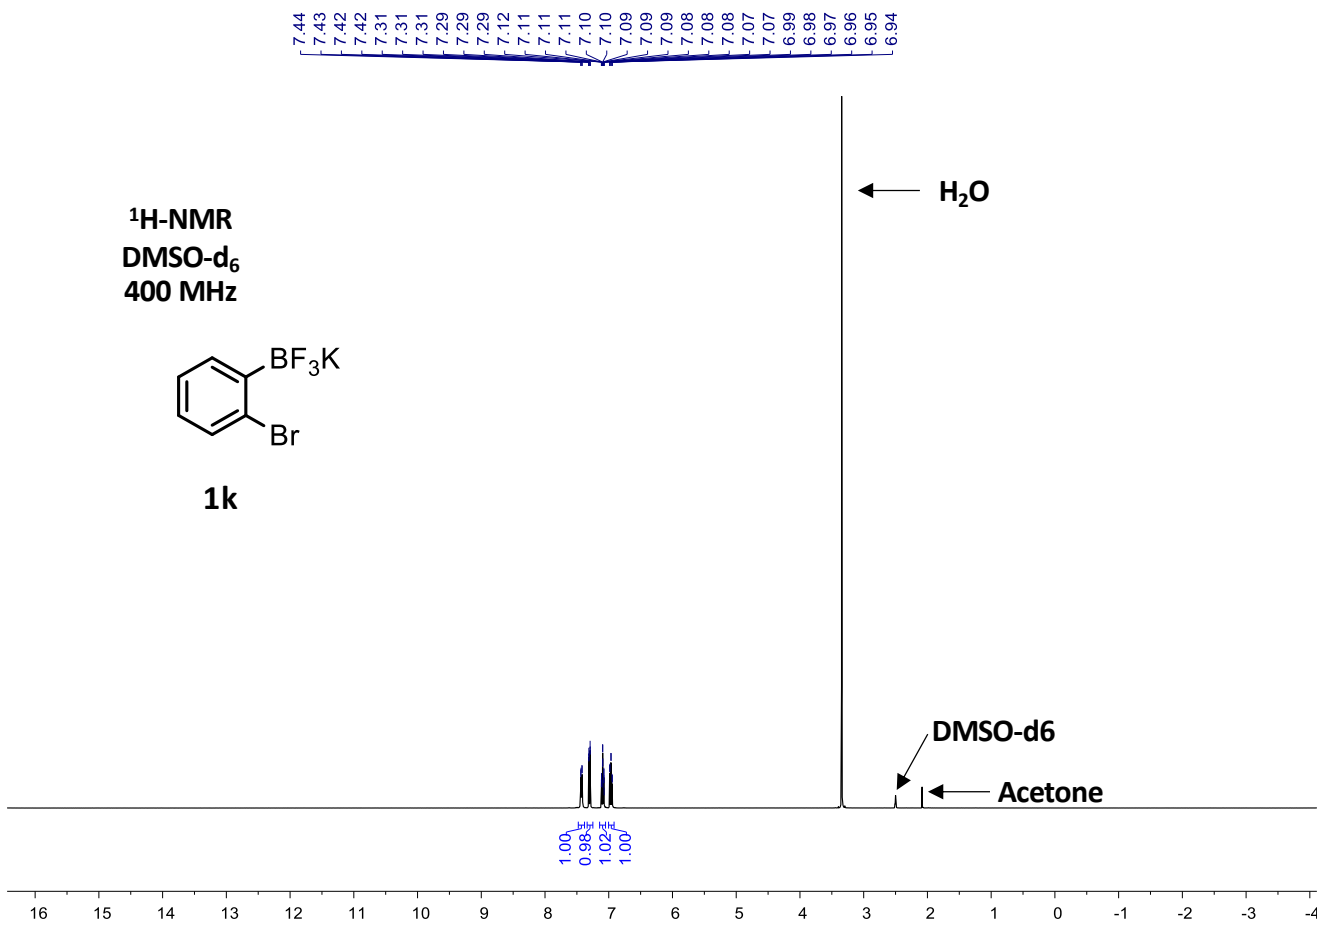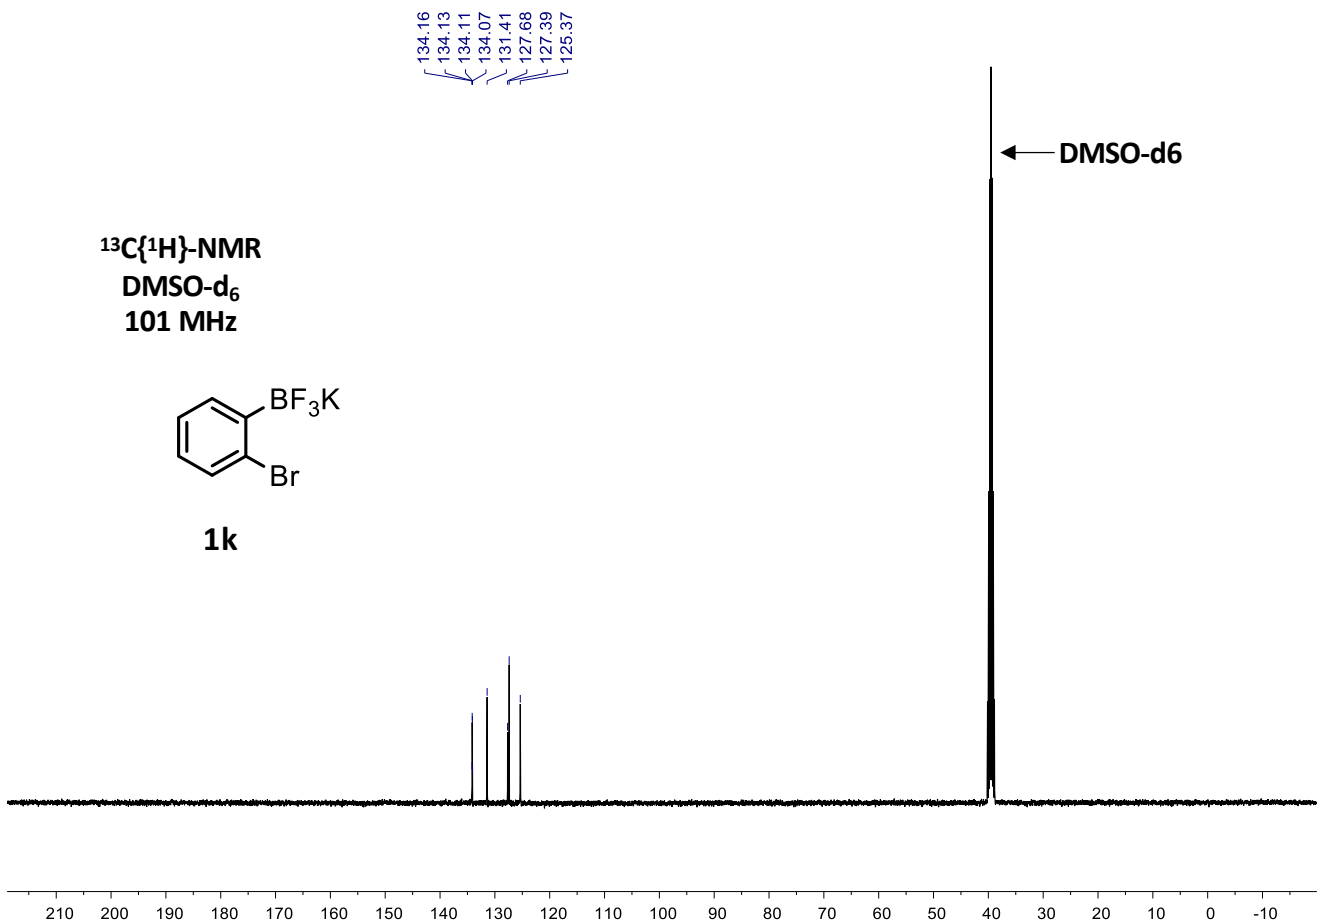

**<sup>19</sup>F-NMR**  
**DMSO-d<sub>6</sub>**  
**376 MHz**

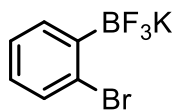

**1k**

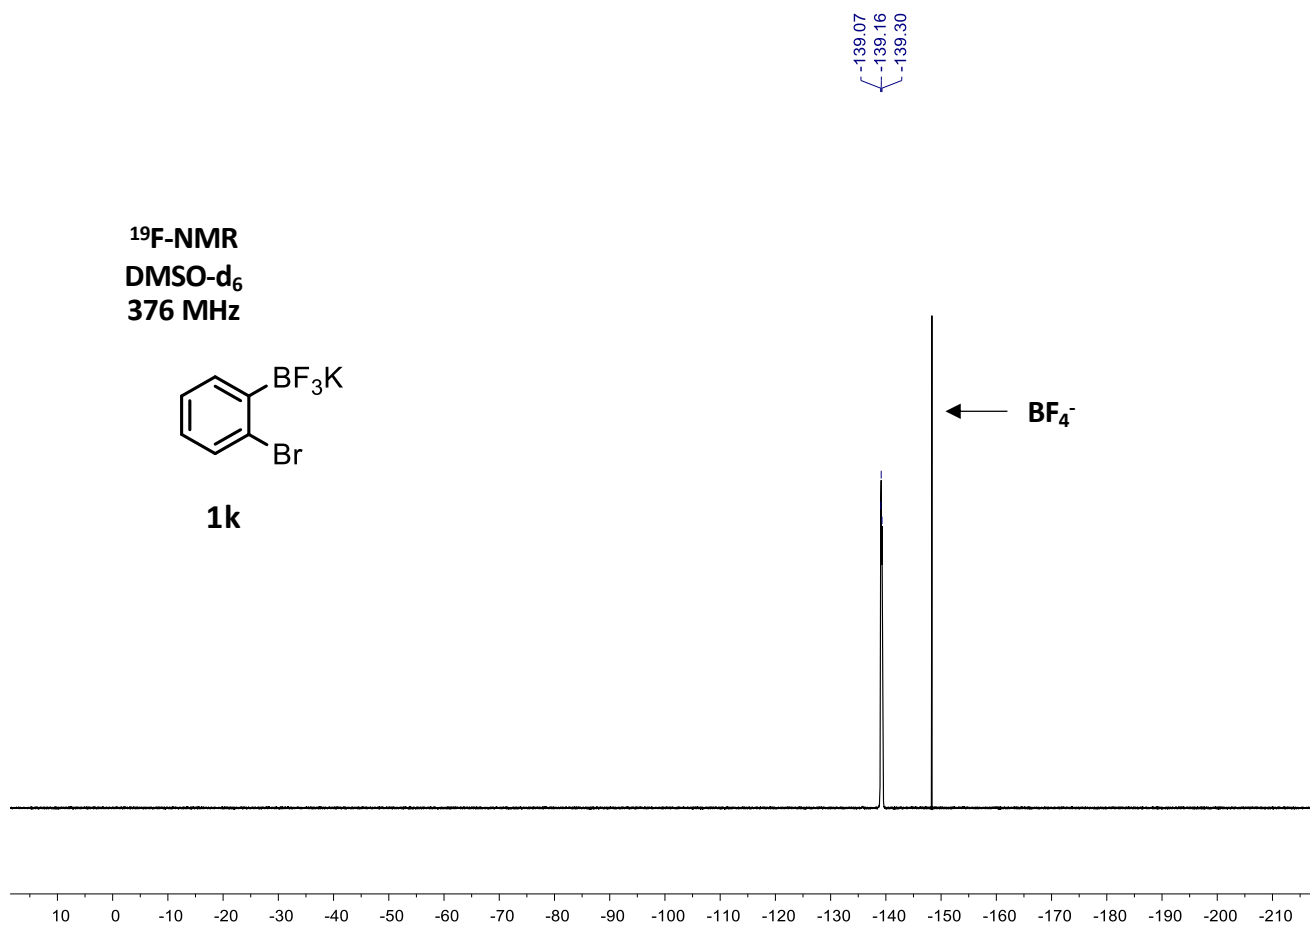

**<sup>11</sup>B-NMR**  
**DMSO-d<sub>6</sub>**  
**128 MHz**

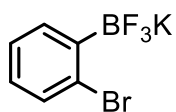

**1k**

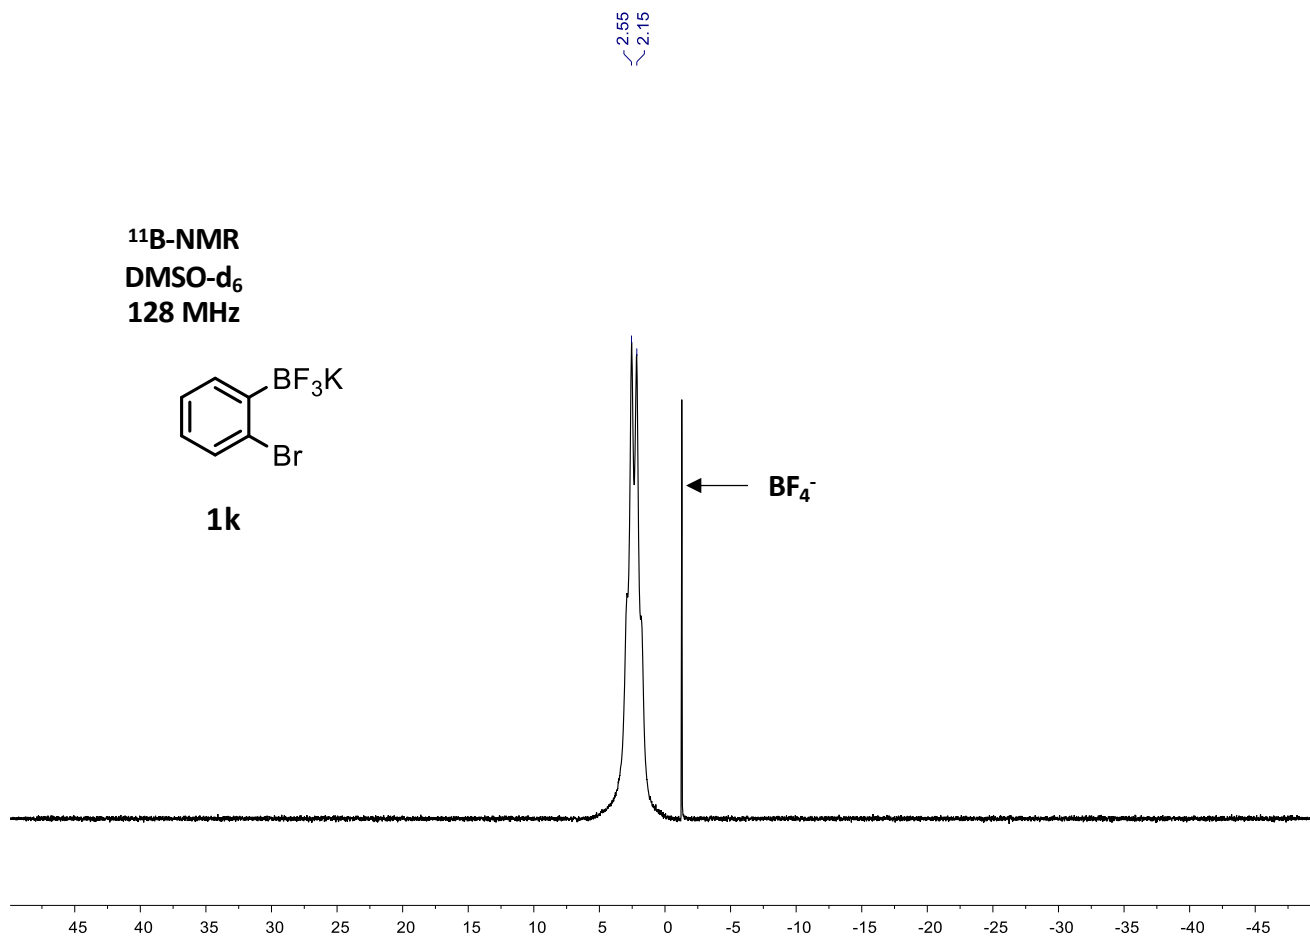

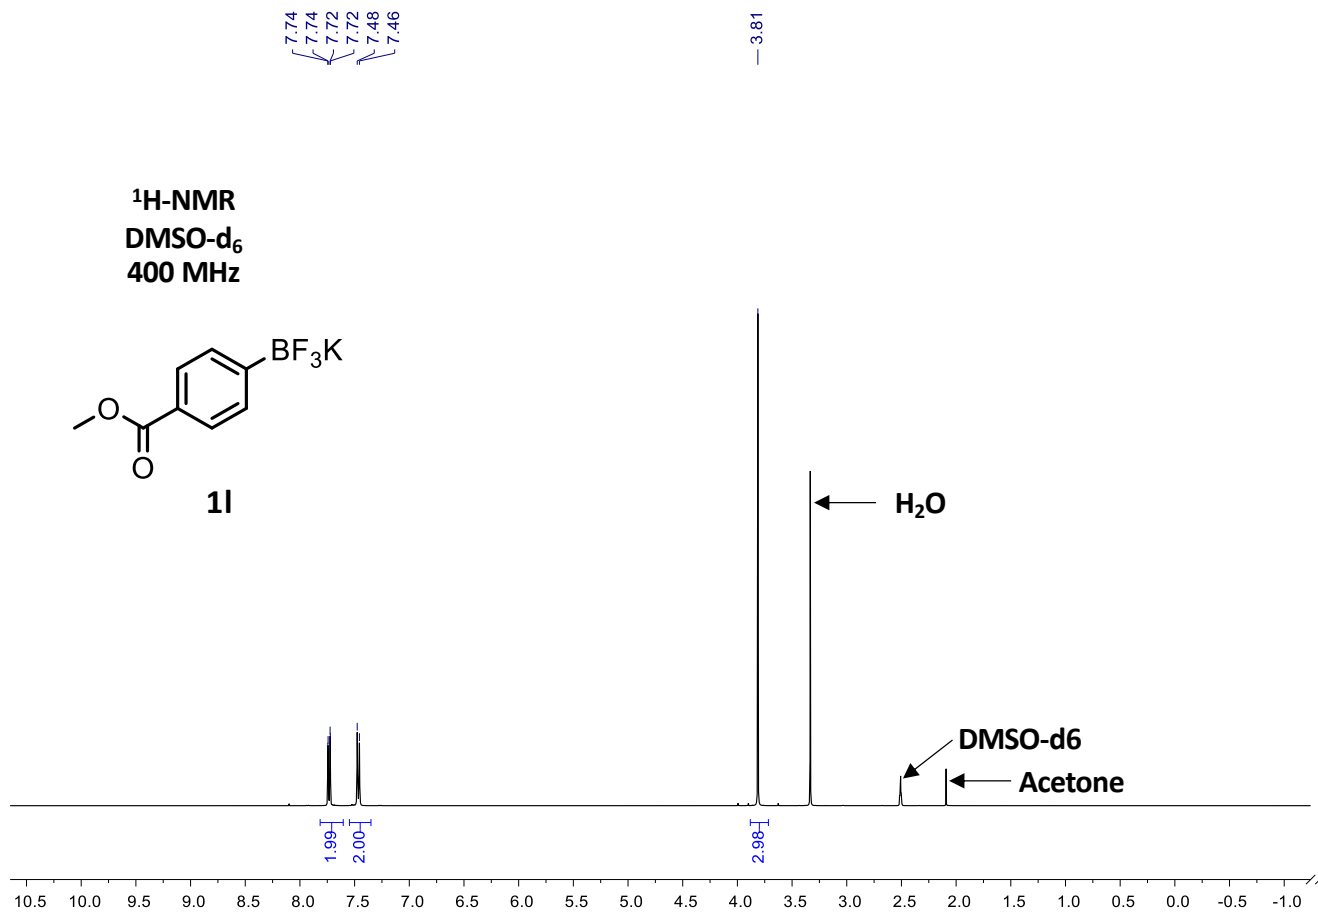

**<sup>19</sup>F-NMR**  
**DMSO-d<sub>6</sub>**  
**376 MHz**

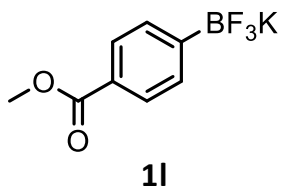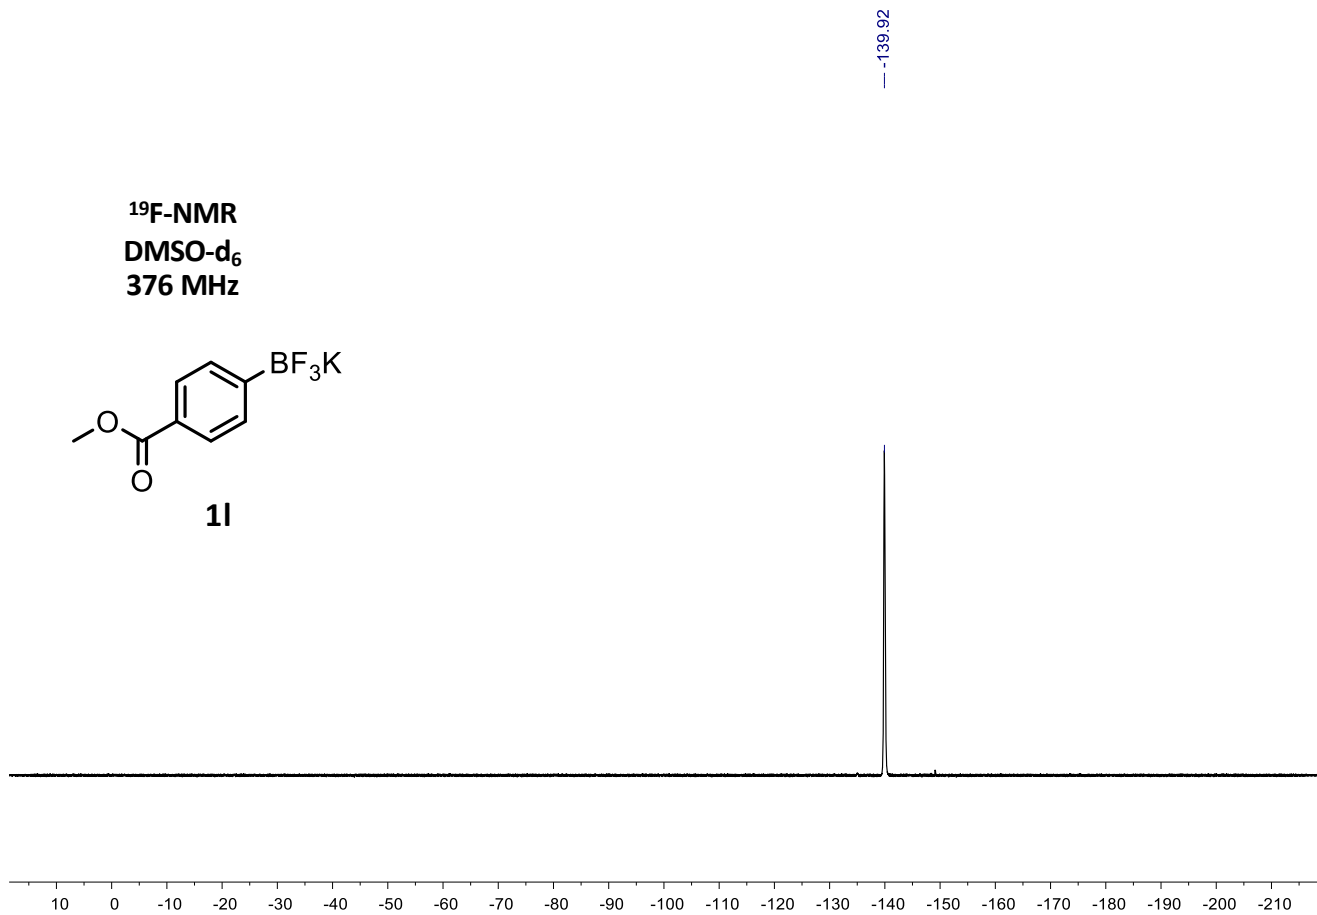

**<sup>11</sup>B-NMR**  
**DMSO-d<sub>6</sub>**  
**128 MHz**

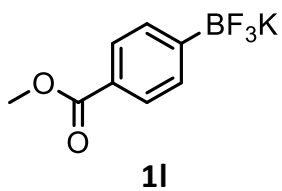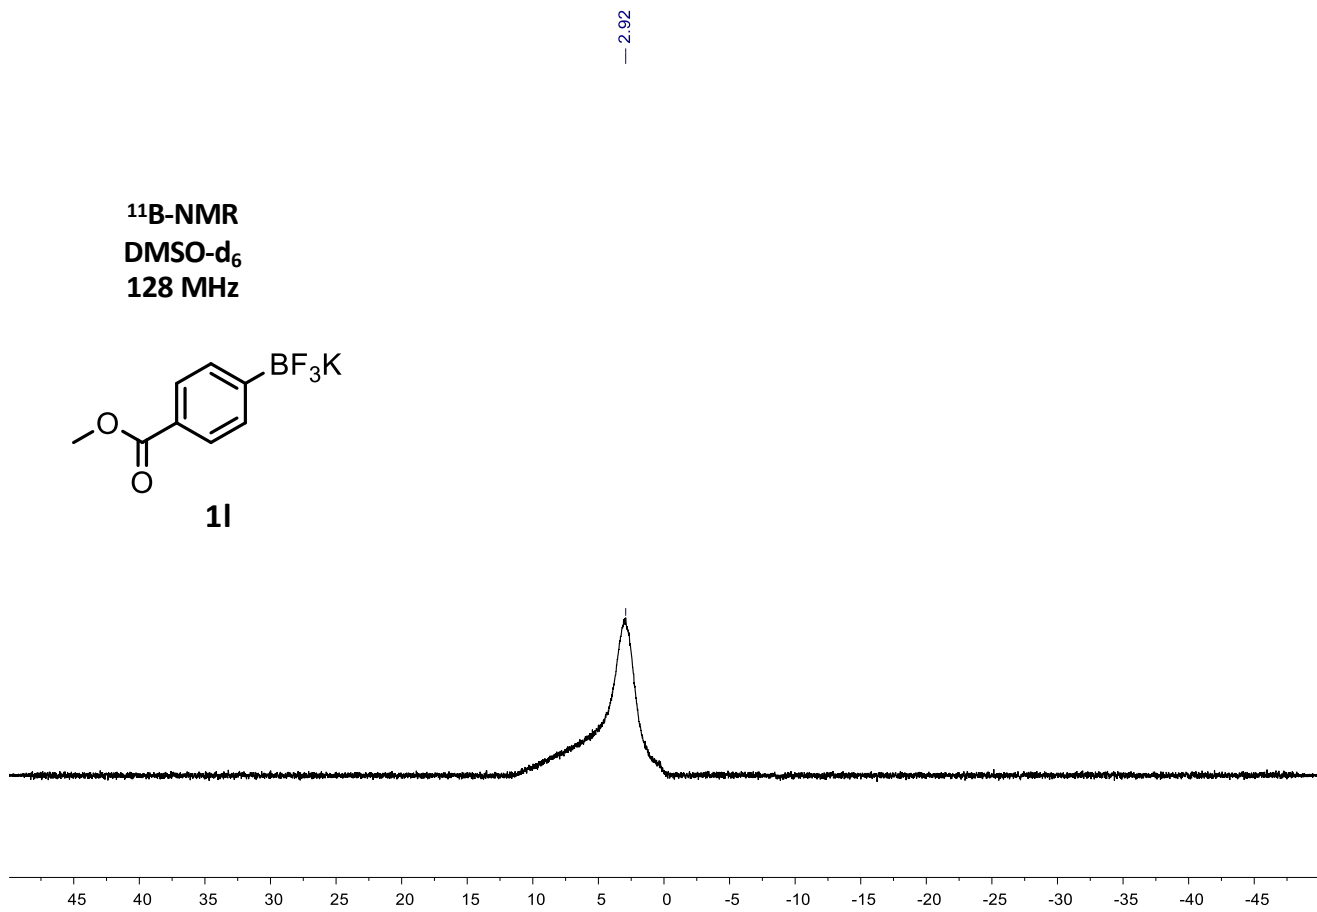

**<sup>1</sup>H-NMR**  
DMSO-d<sub>6</sub>  
400 MHz

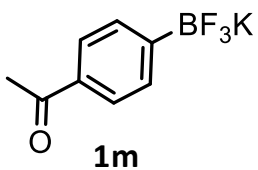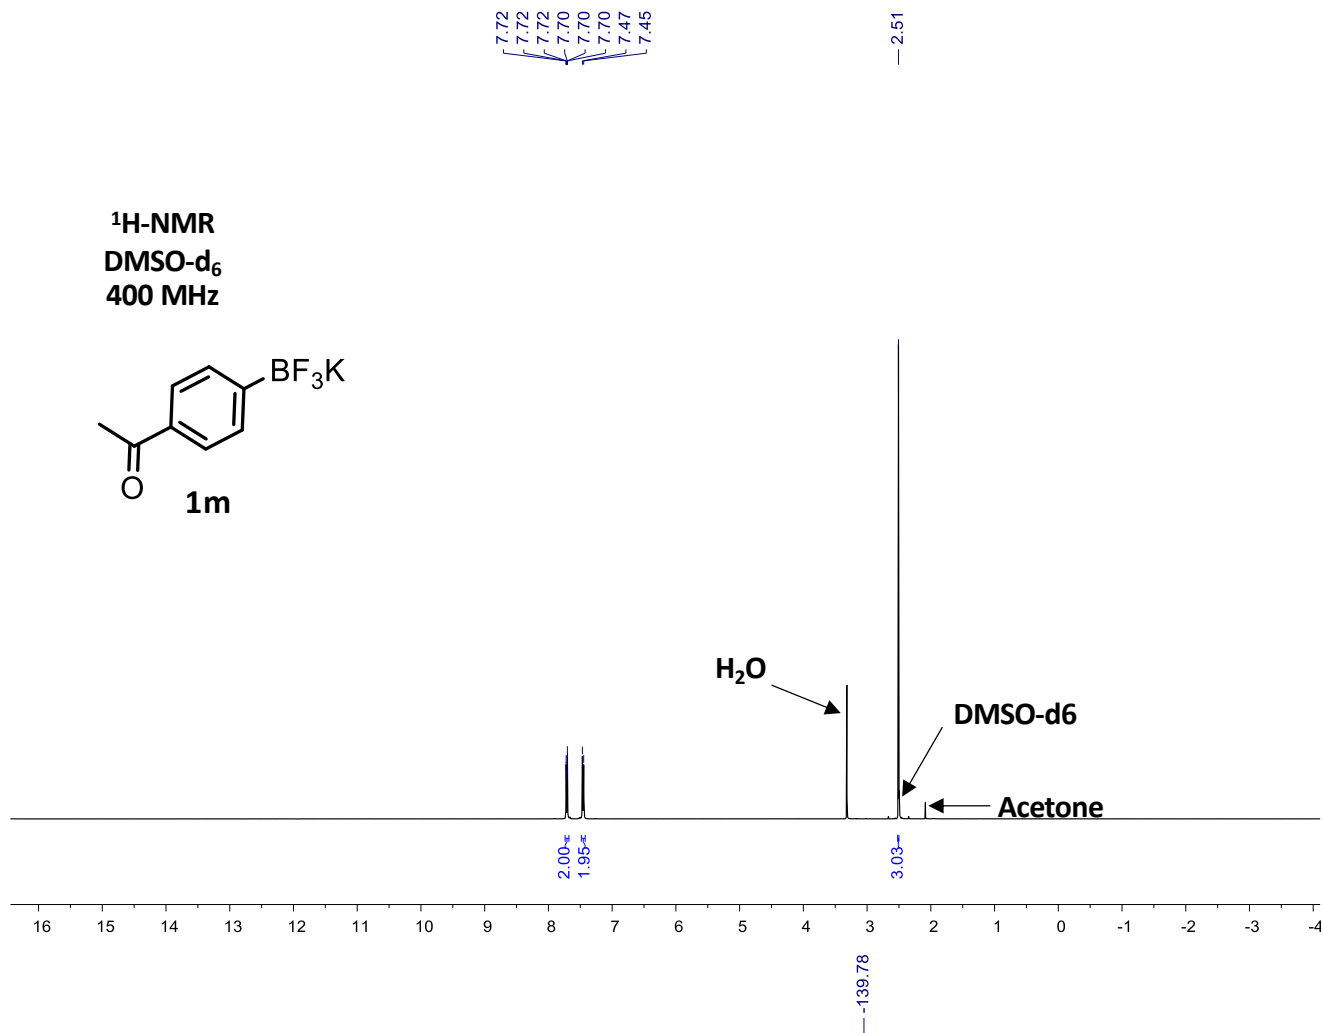

**<sup>19</sup>F-NMR**  
DMSO-d<sub>6</sub>  
376 MHz

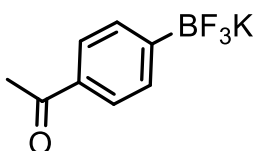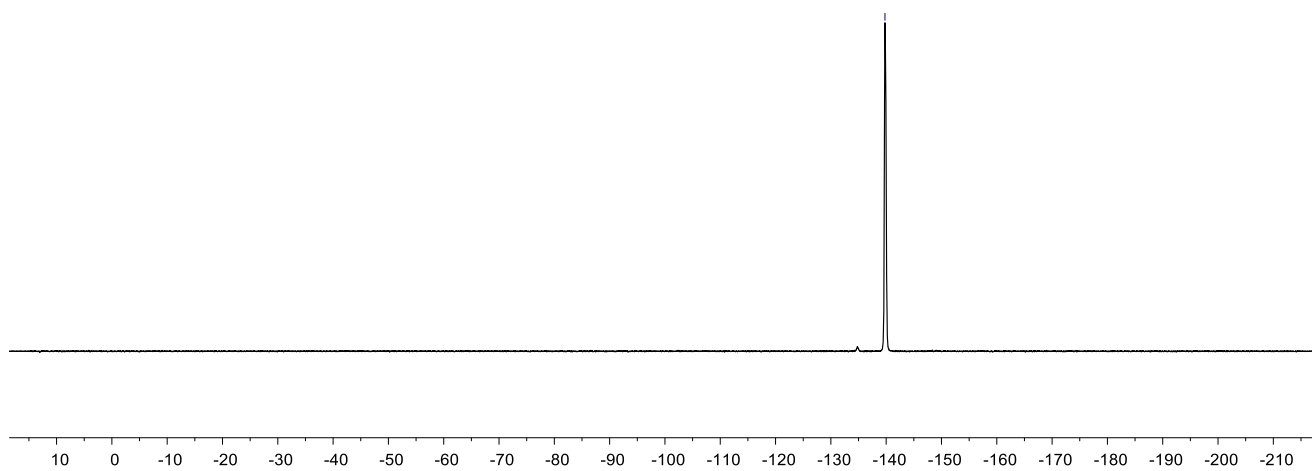



<sup>11</sup>B-NMR  
DMSO-d<sub>6</sub>  
128 MHz

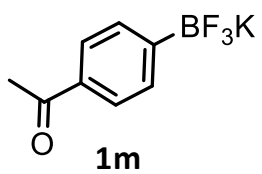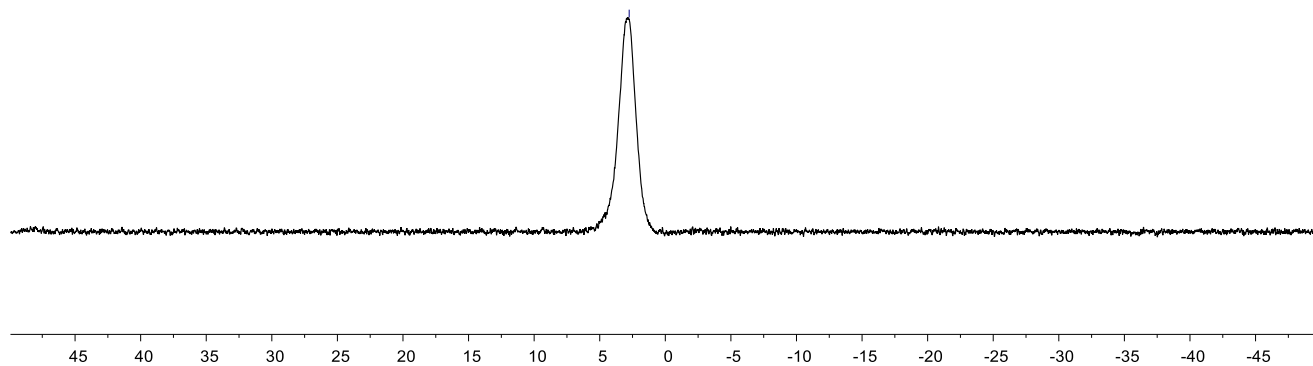

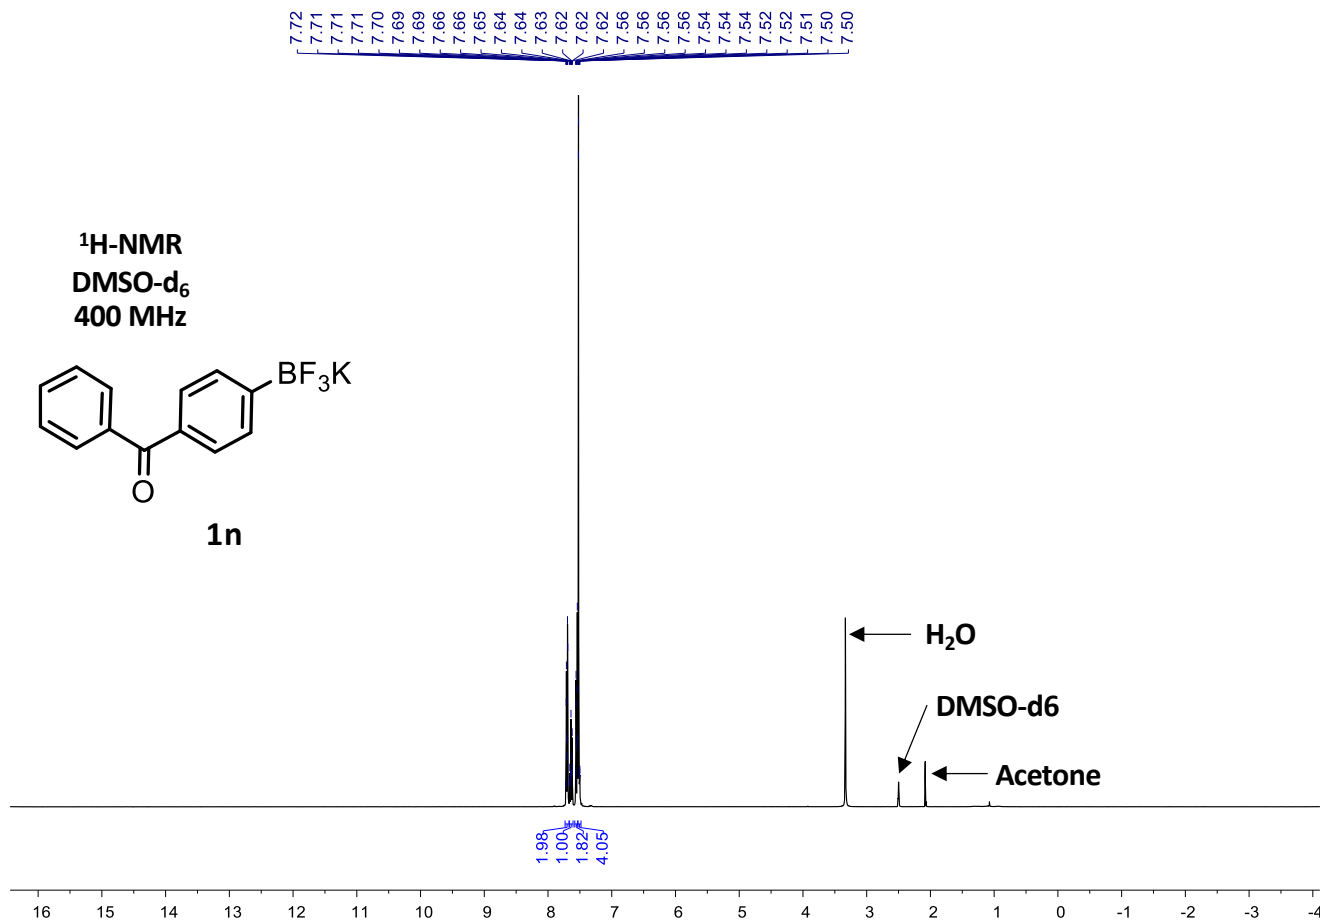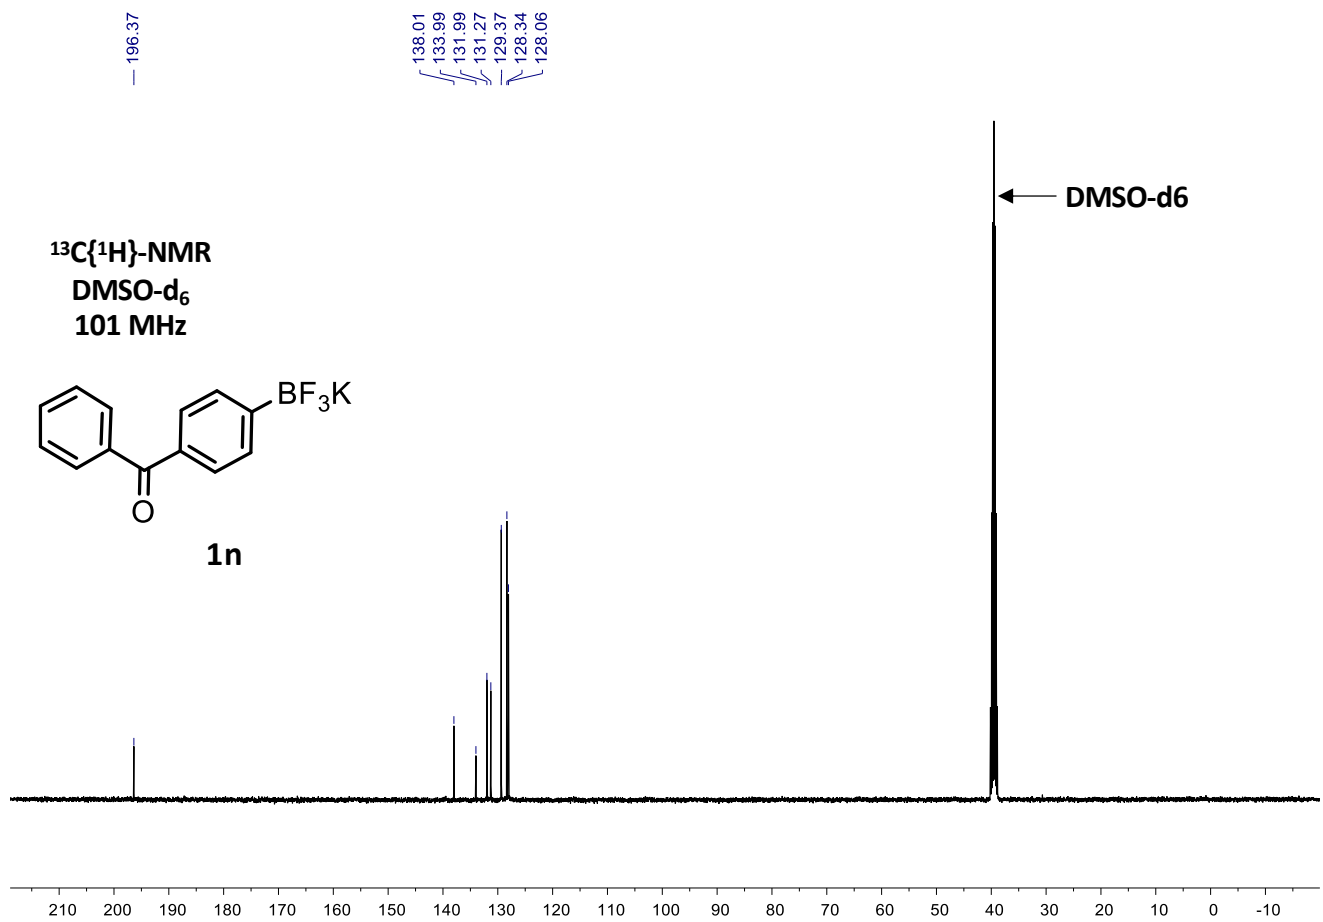

**<sup>19</sup>F-NMR**  
DMSO-d<sub>6</sub>  
376 MHz

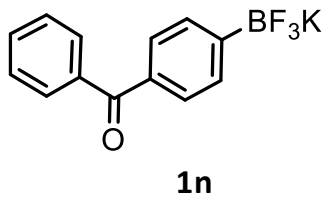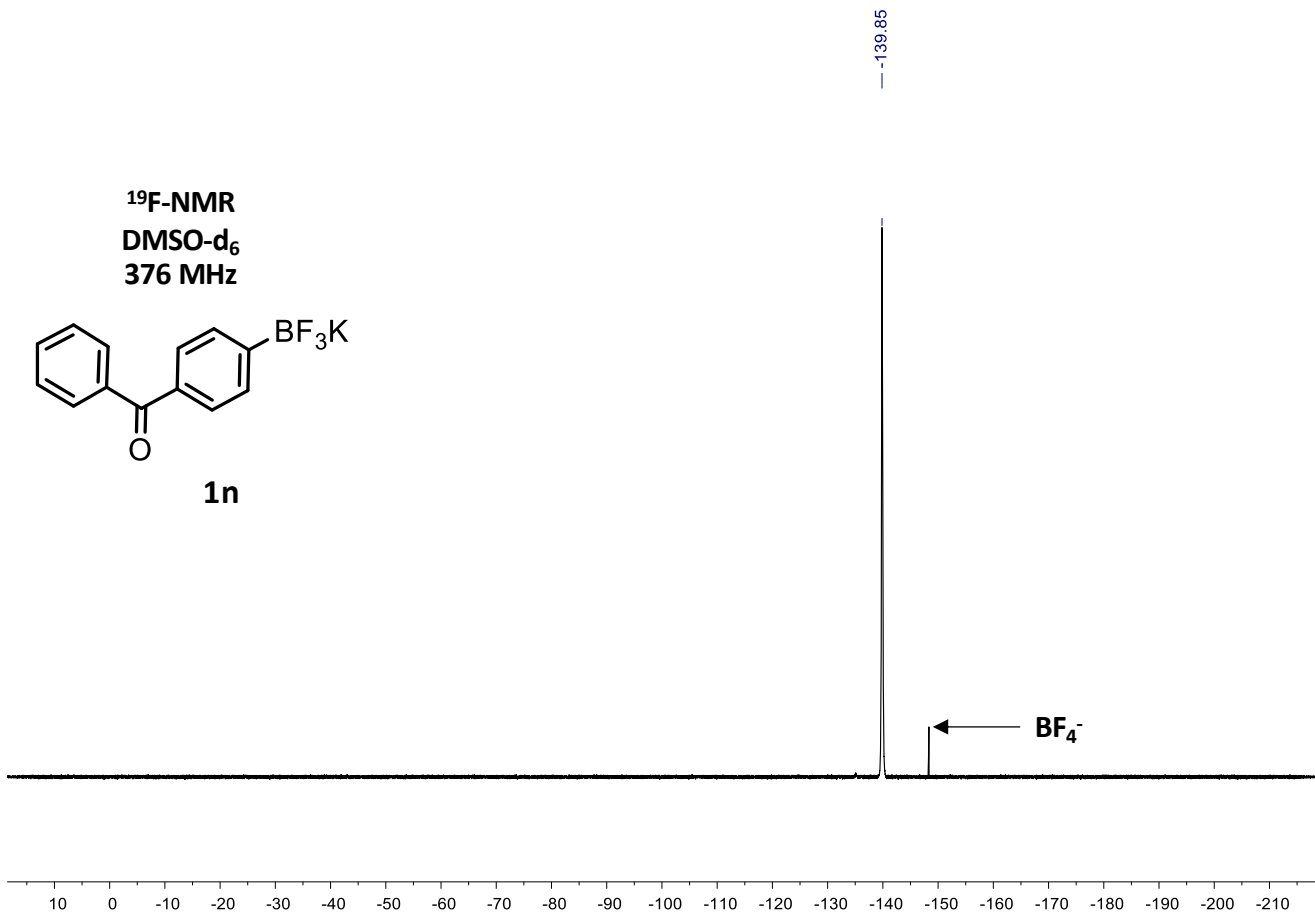

**<sup>11</sup>B-NMR**  
DMSO-d<sub>6</sub>  
128 MHz

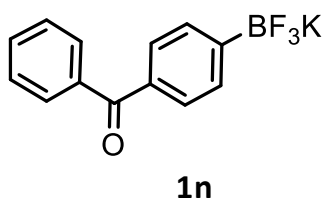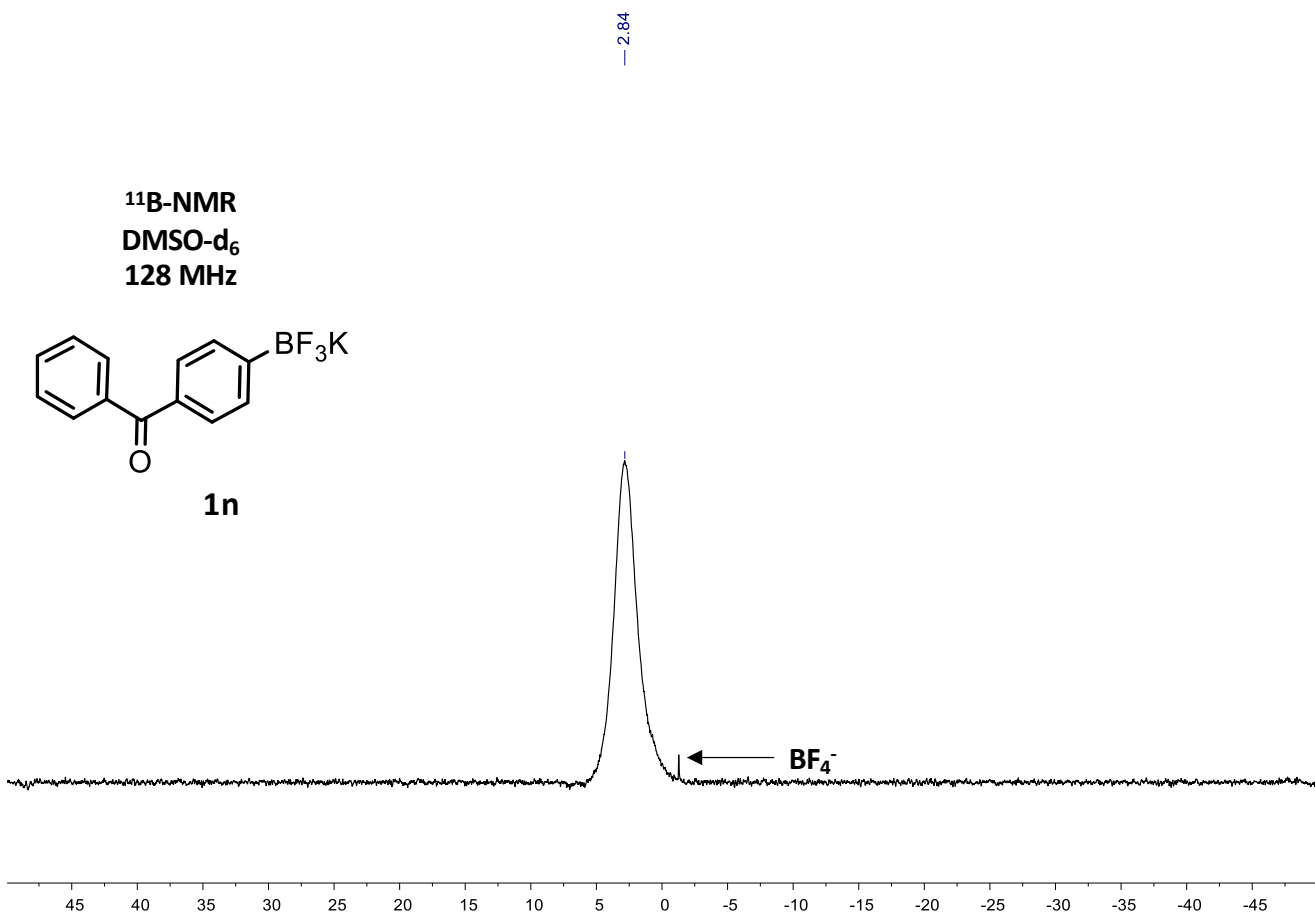

7.56  
7.54  
7.44  
7.42

**<sup>1</sup>H-NMR**  
DMSO-d<sub>6</sub>  
400 MHz

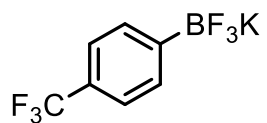

**1o**

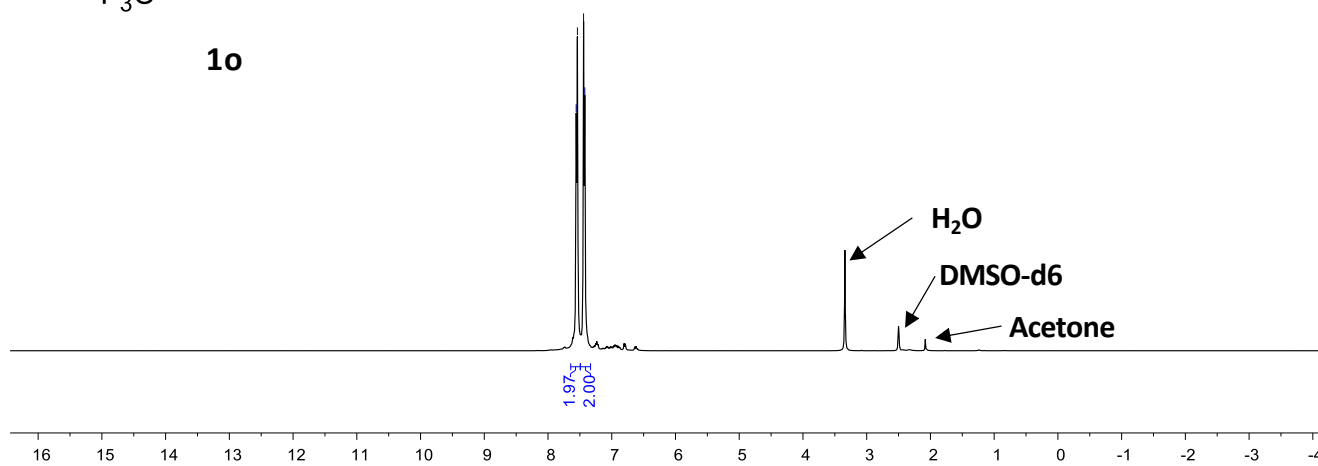

**<sup>19</sup>F-NMR**  
DMSO-d<sub>6</sub>  
376 MHz

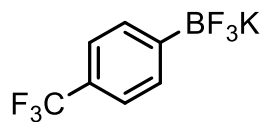

**1o**

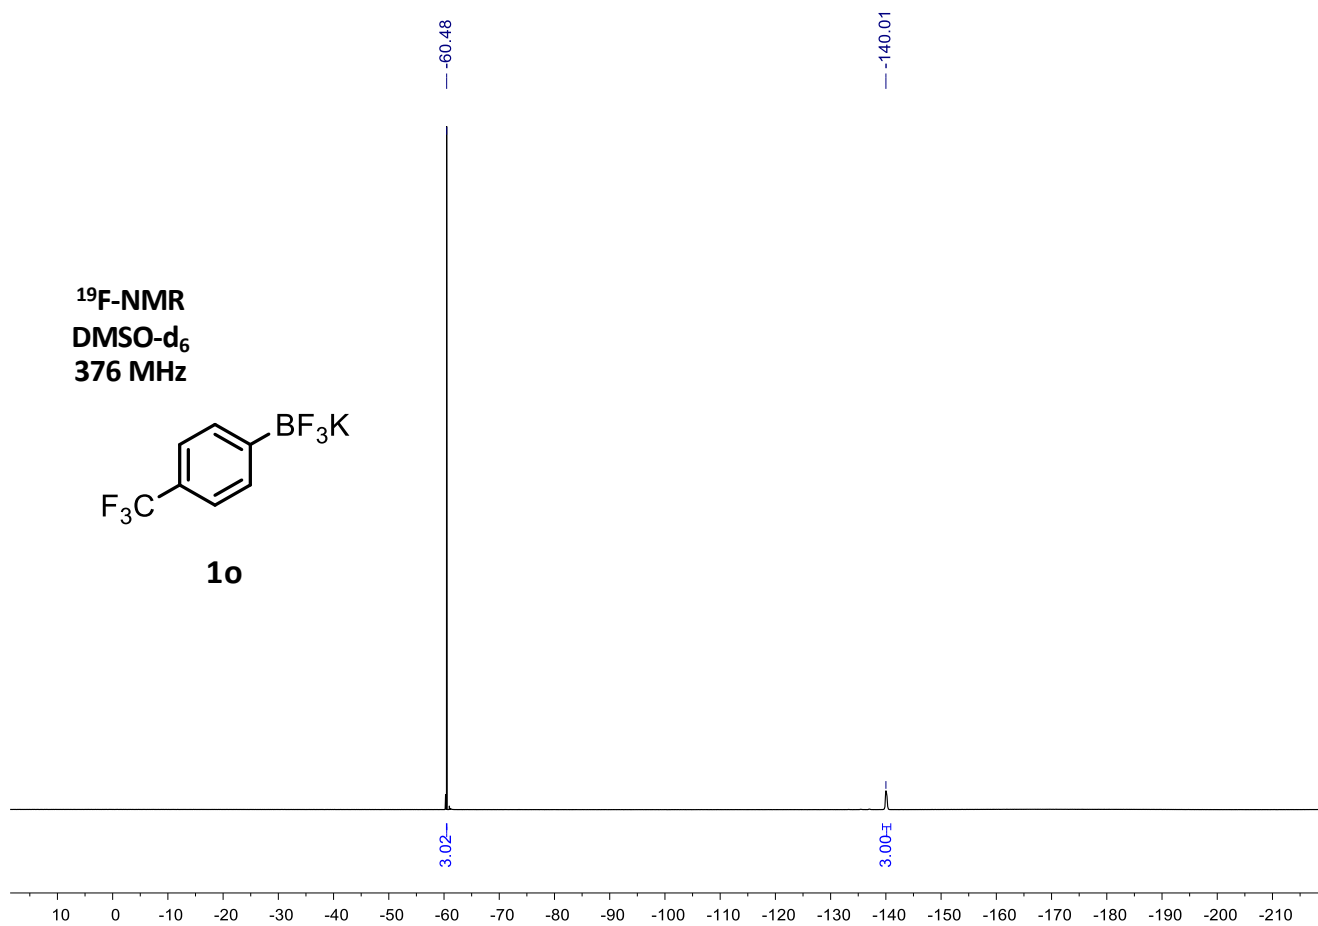

**<sup>1</sup>H-NMR**  
DMSO-d<sub>6</sub>  
400 MHz

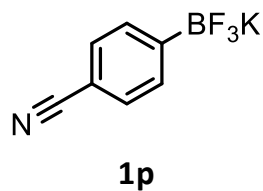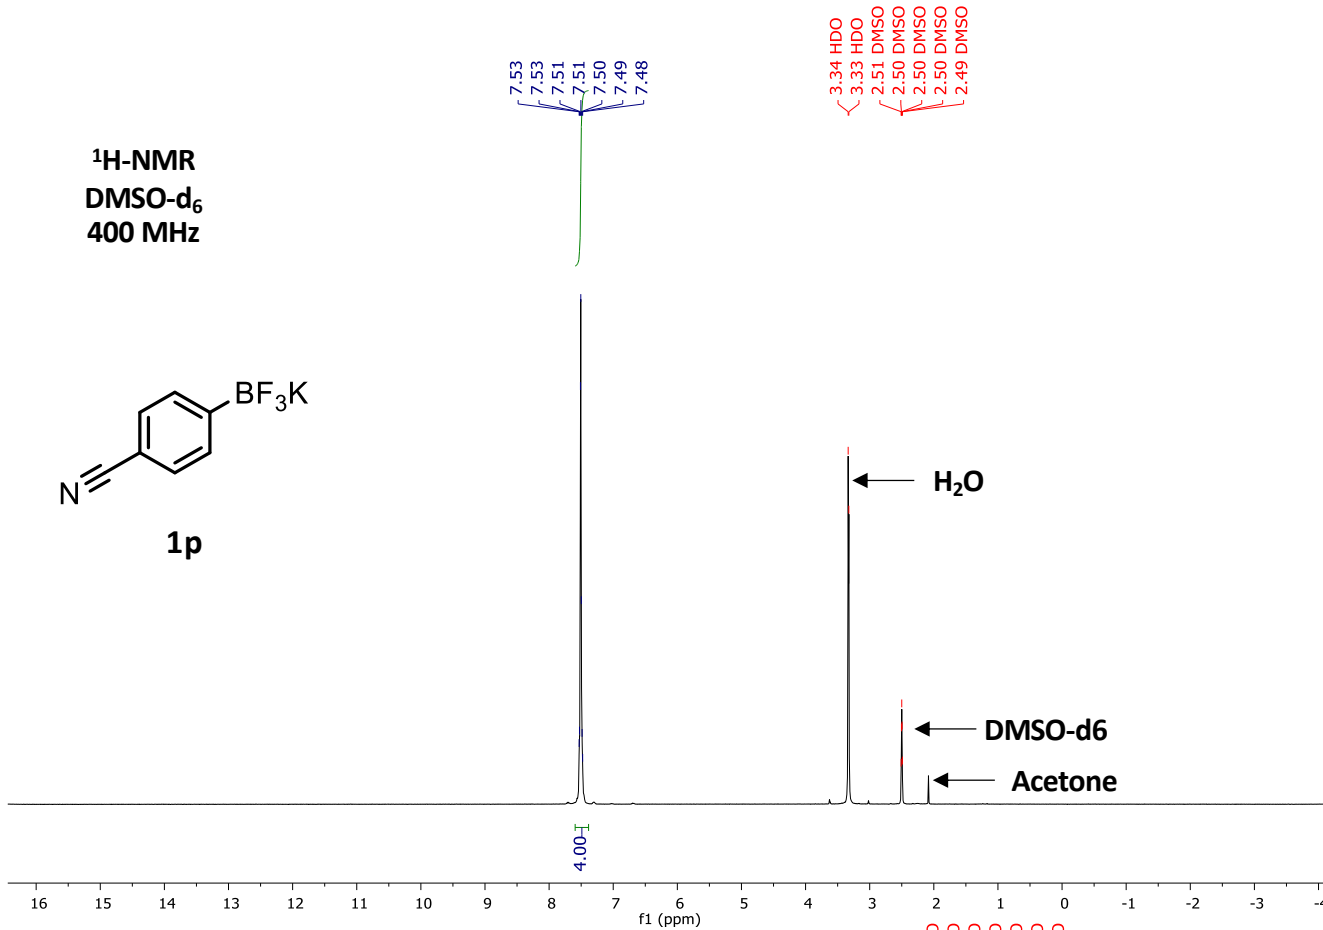

**<sup>13</sup>C{<sup>1</sup>H}-NMR**  
DMSO-d<sub>6</sub>  
101 MHz

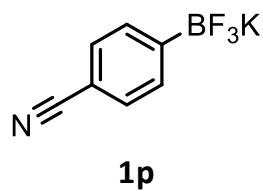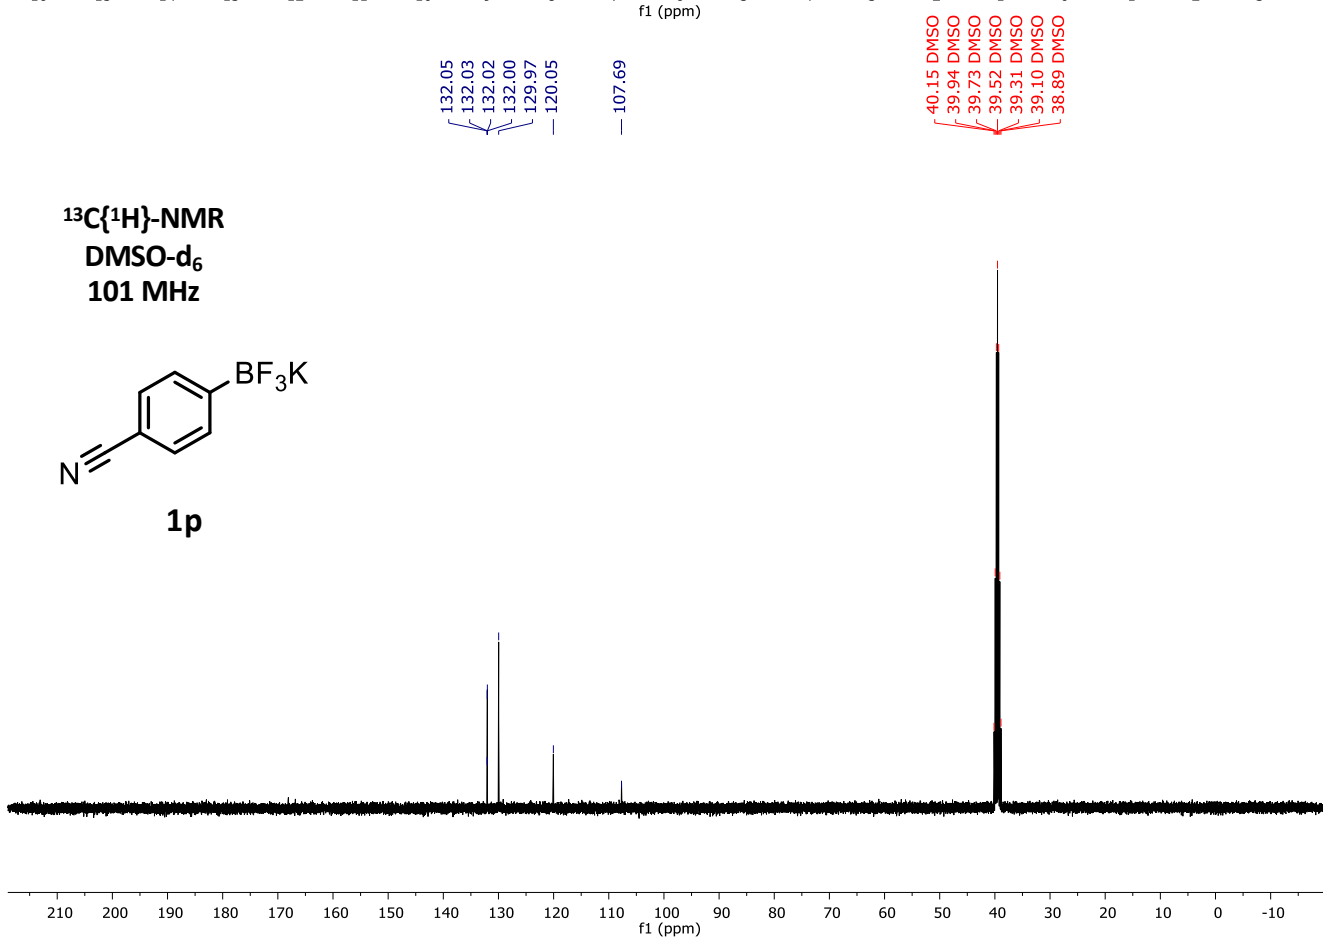

**<sup>19</sup>F-NMR**  
DMSO-d<sub>6</sub>  
376 MHz

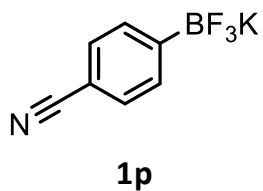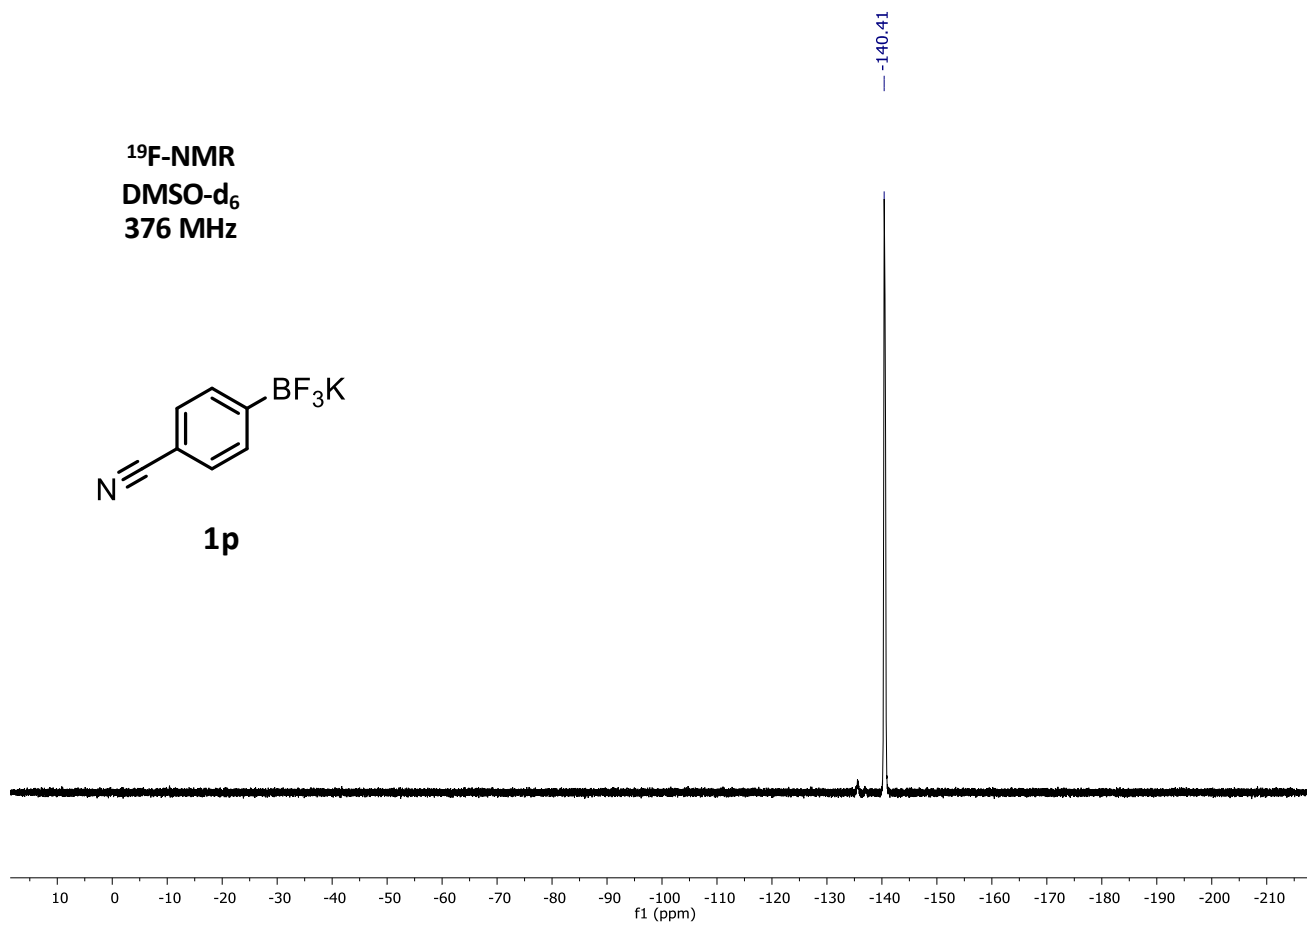

**<sup>11</sup>B-NMR**  
DMSO-d<sub>6</sub>  
128 MHz

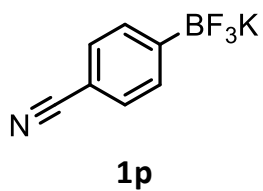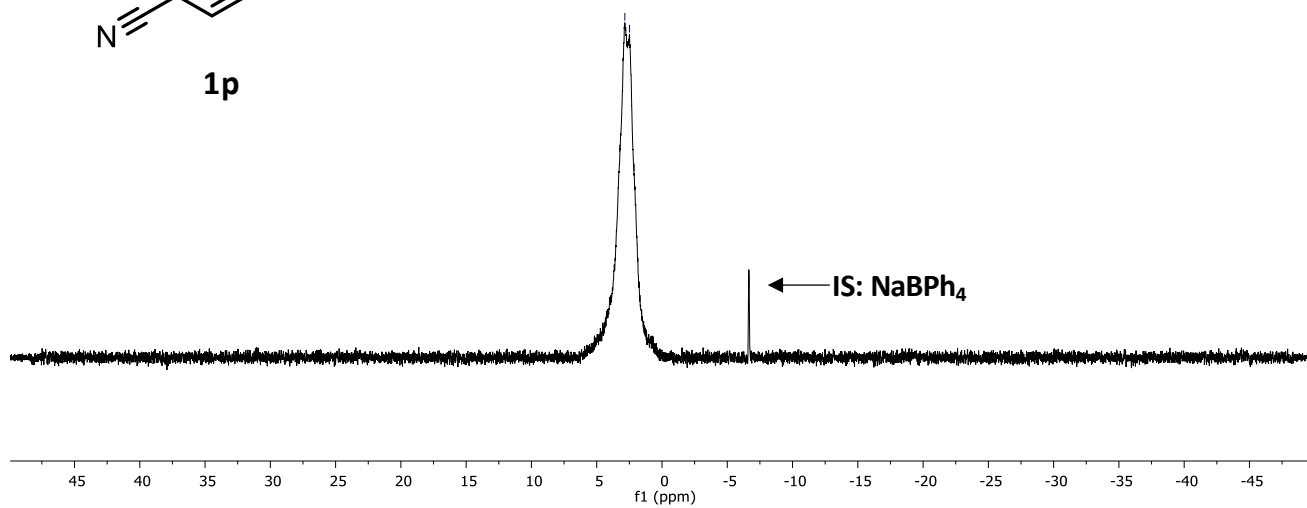

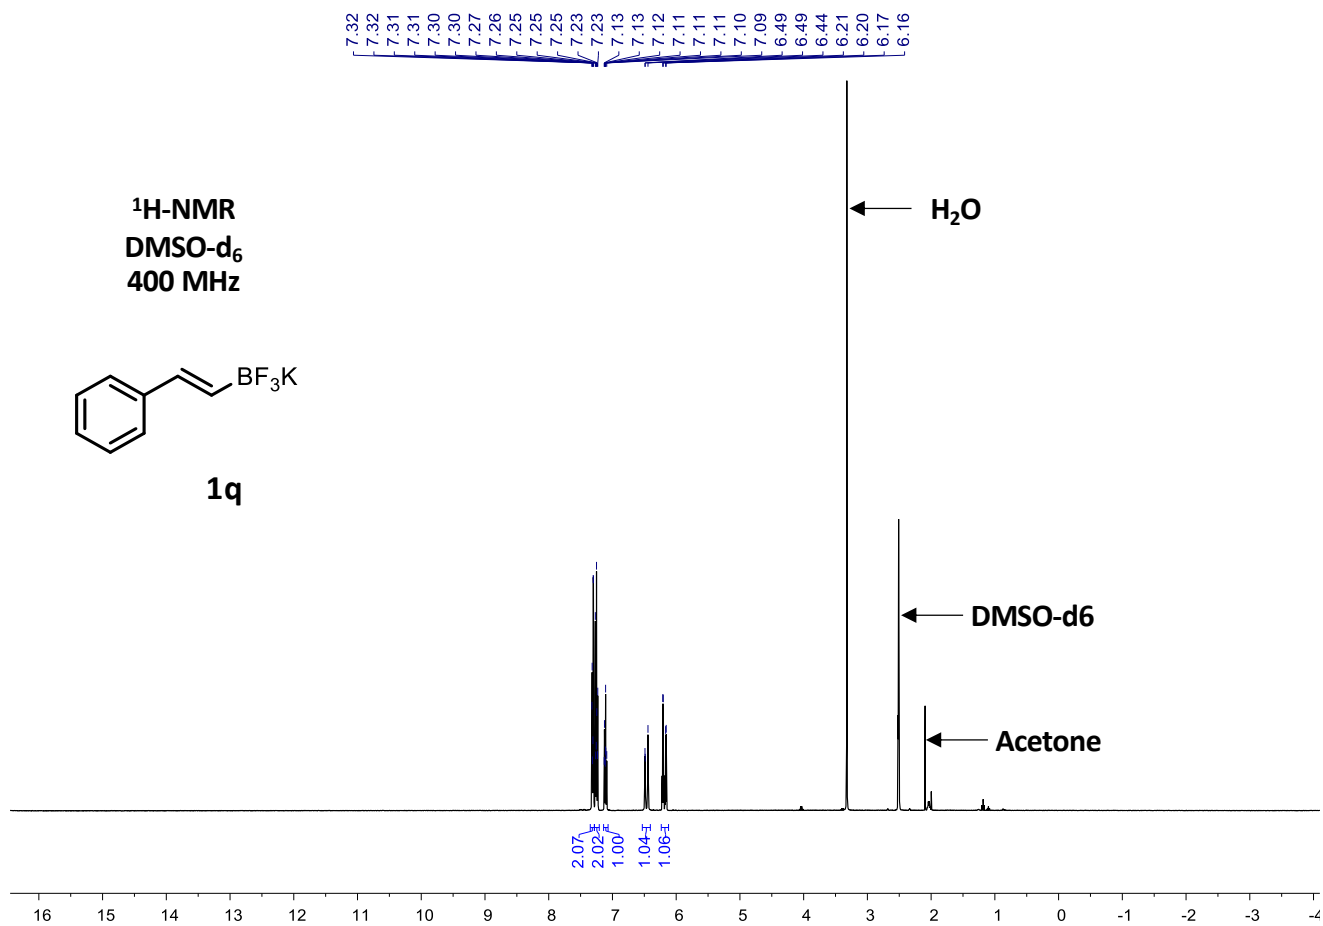

**<sup>1</sup>H-NMR**  
DMSO-d<sub>6</sub>  
400 MHz

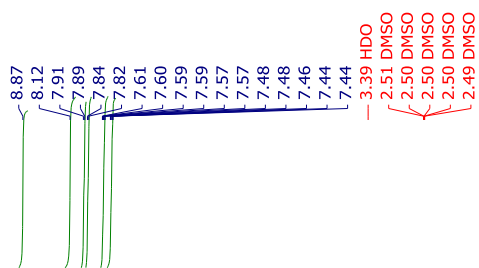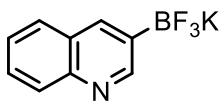

**1r**

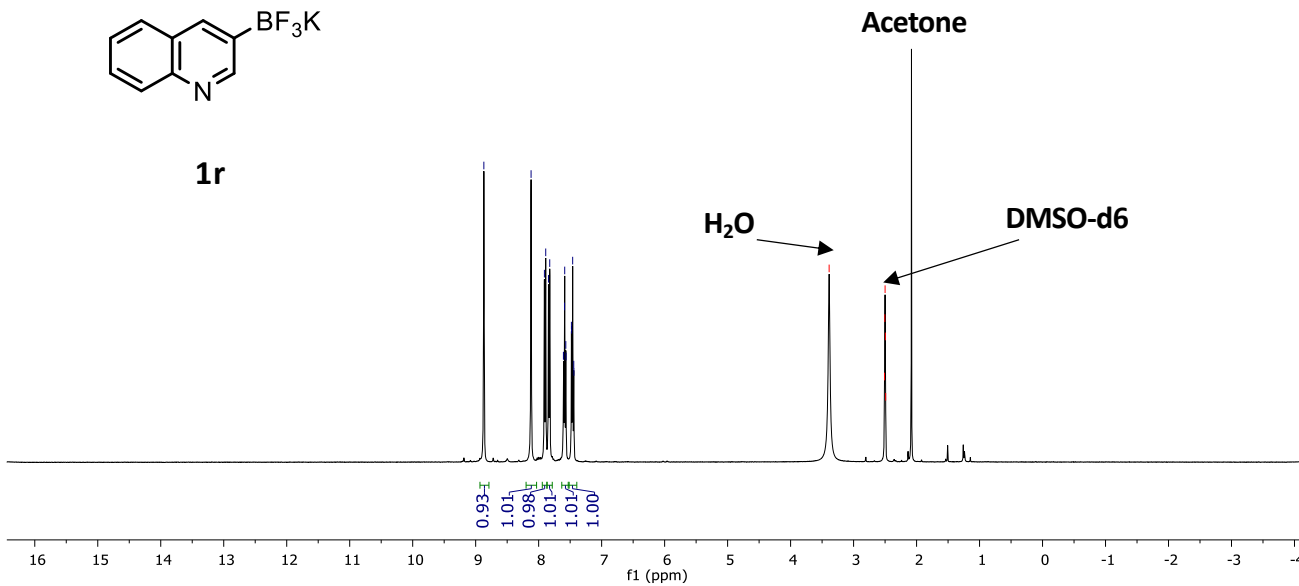

**<sup>13</sup>C{<sup>1</sup>H}-NMR**  
DMSO-d<sub>6</sub>  
101 MHz

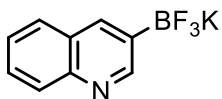

**1r**

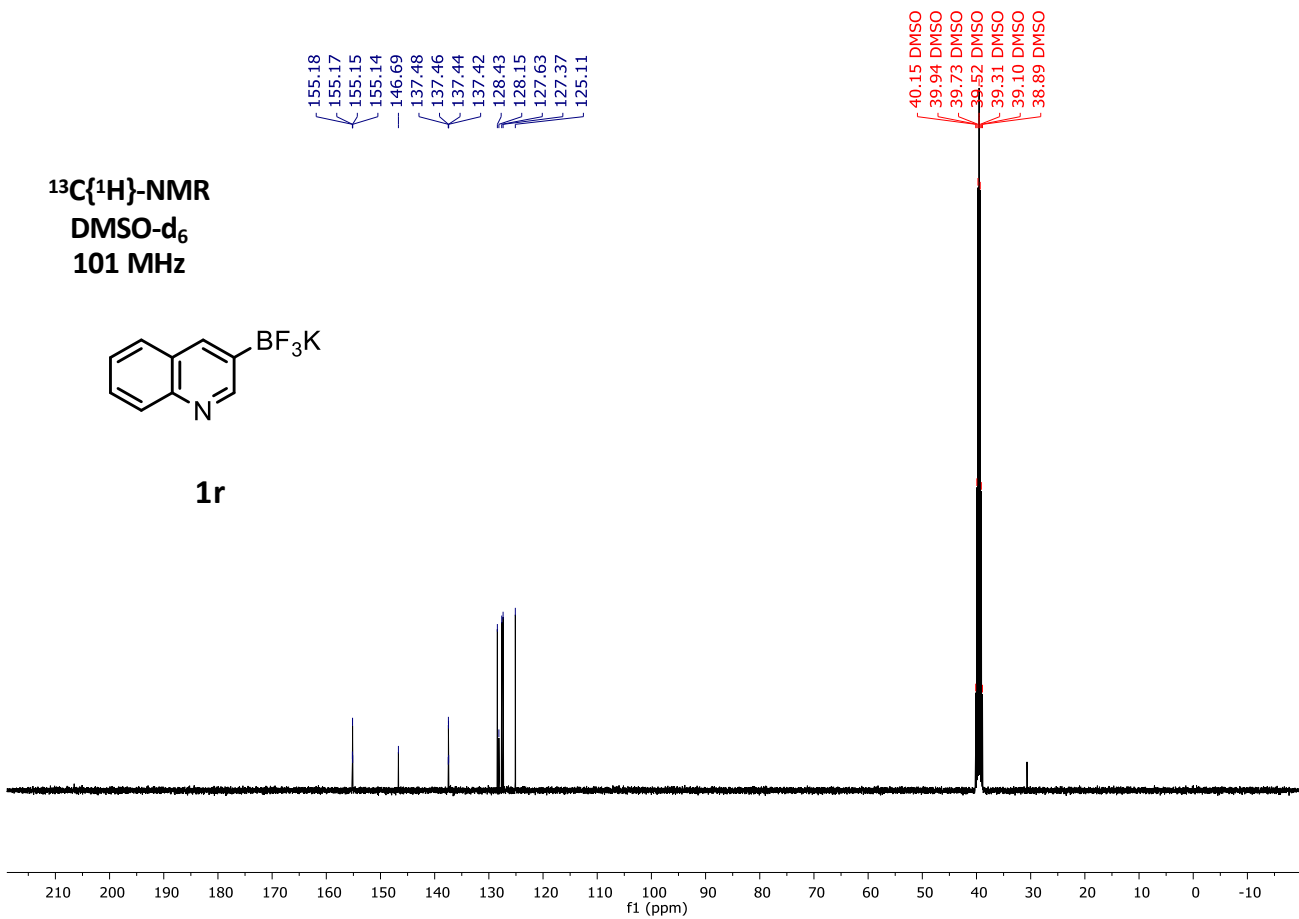



**<sup>19</sup>F-NMR**  
**DMSO-d<sub>6</sub>**  
**376 MHz**



**1r**

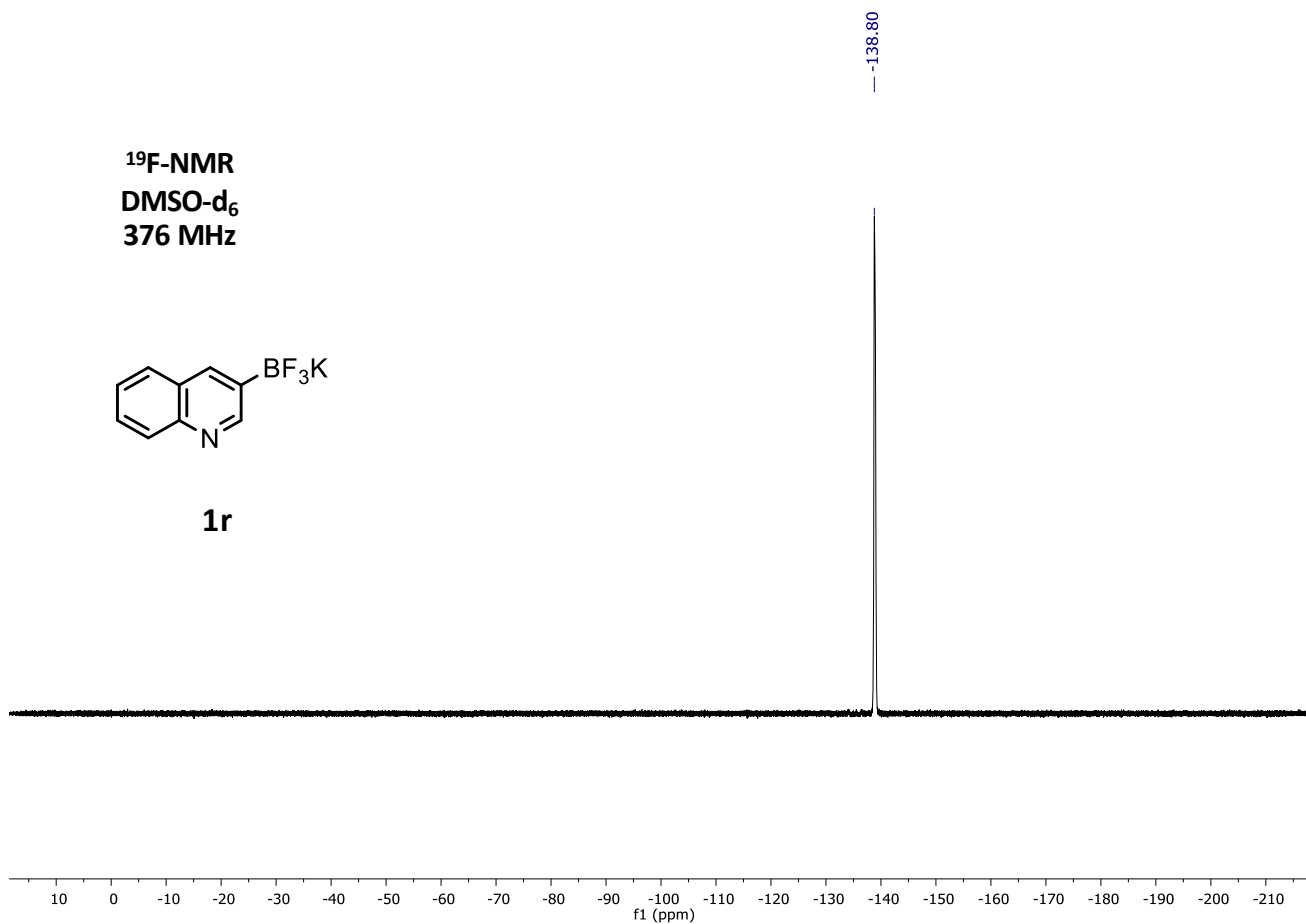

**<sup>11</sup>B-NMR**  
**DMSO-d<sub>6</sub>**  
**128 MHz**

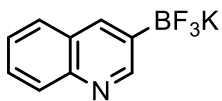

**1r**

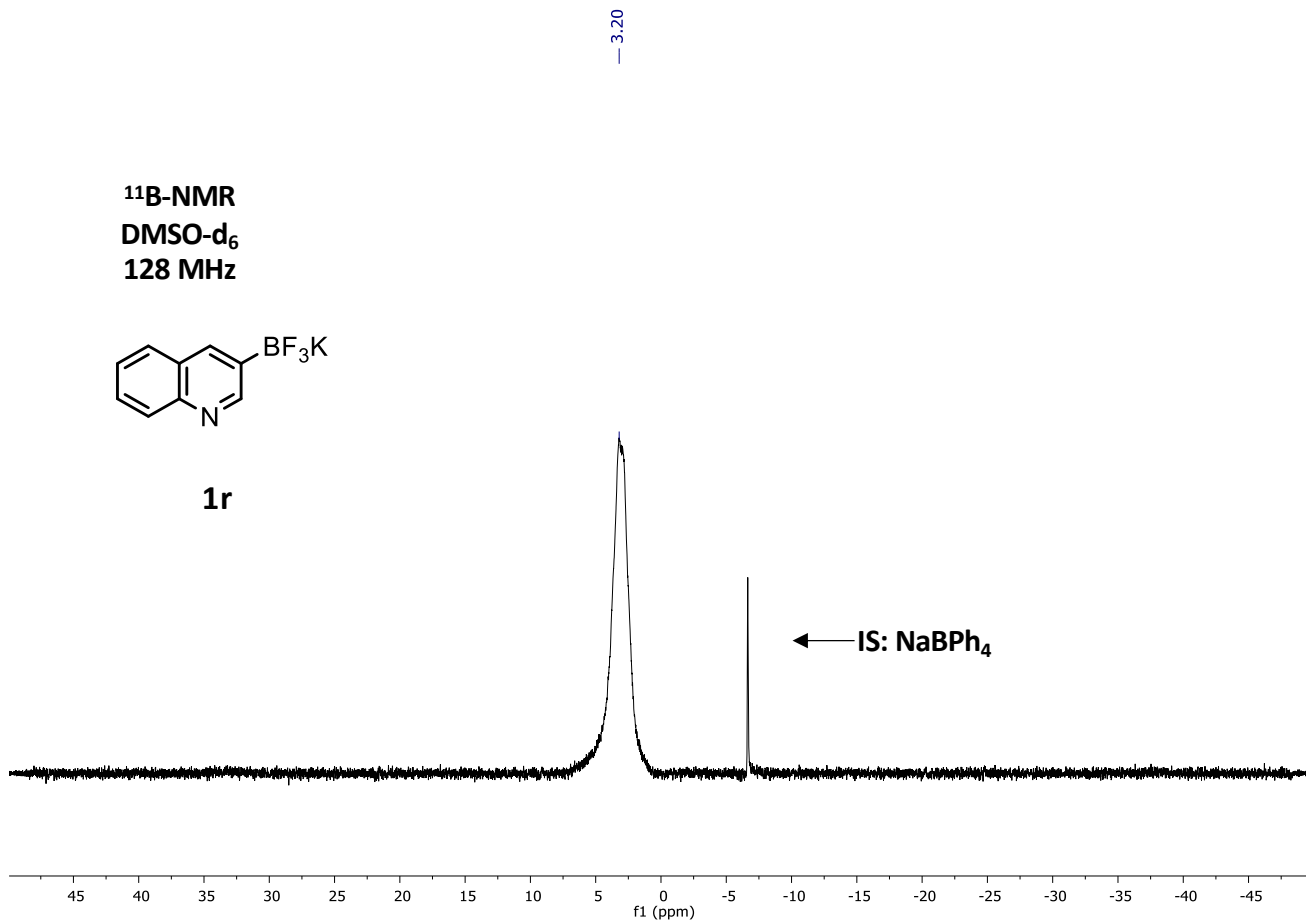

**<sup>1</sup>H-NMR**  
DMSO-d<sub>6</sub>  
400 MHz

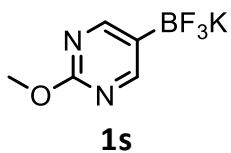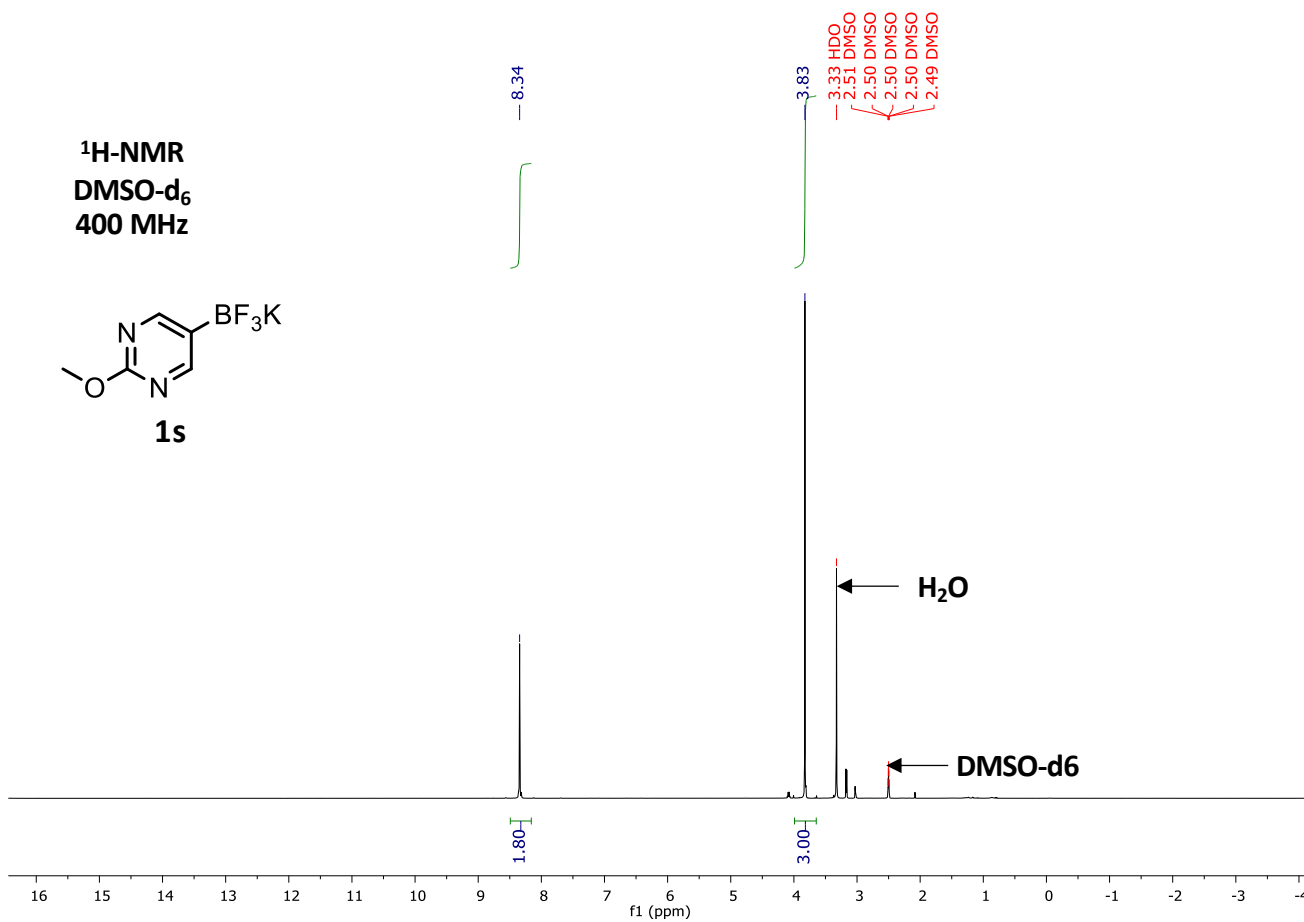

**<sup>13</sup>C{<sup>1</sup>H}-NMR**  
DMSO-d<sub>6</sub>  
101 MHz

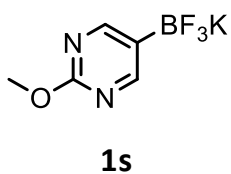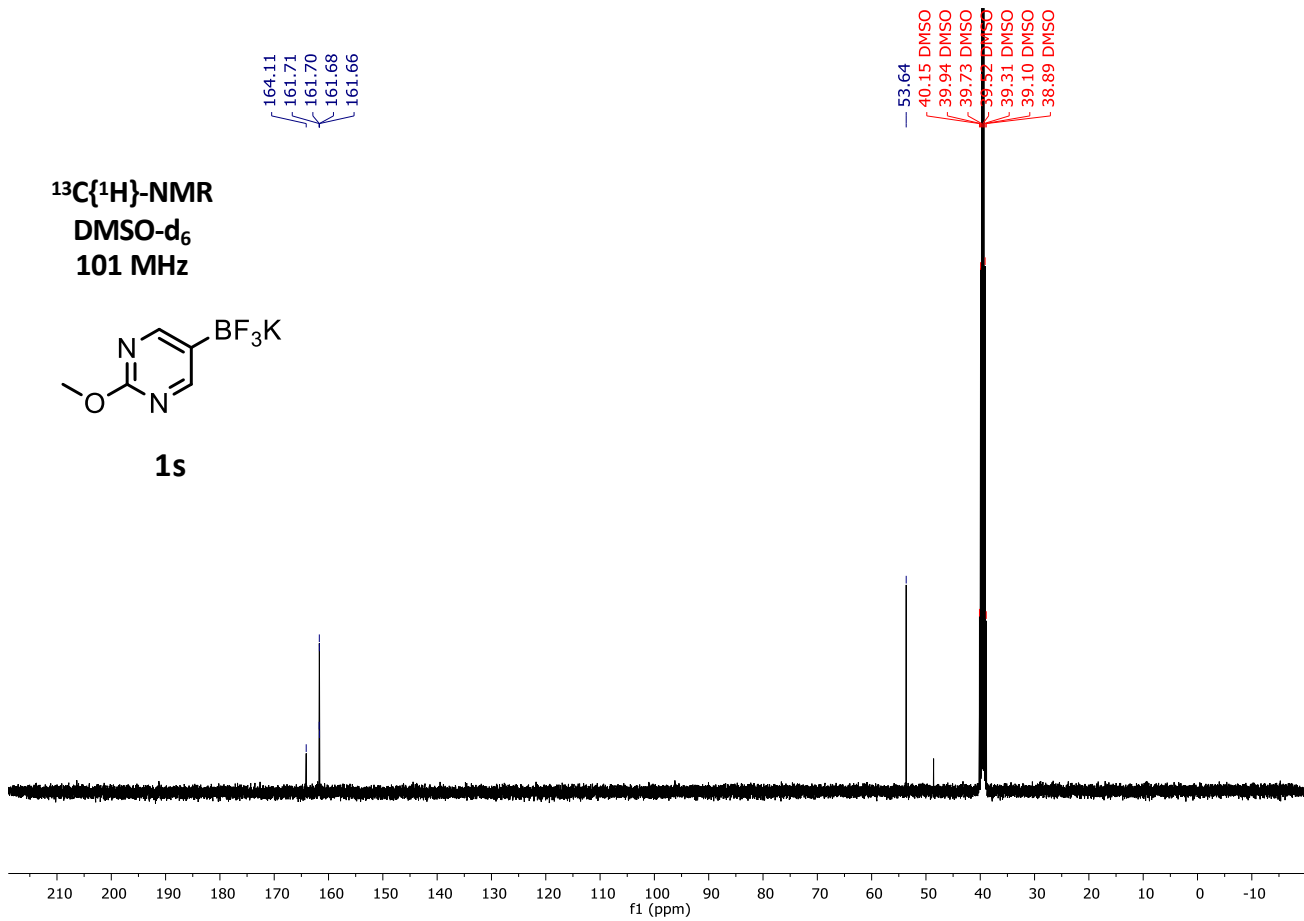

**<sup>19</sup>F-NMR**  
**DMSO-d<sub>6</sub>**  
**376 MHz**

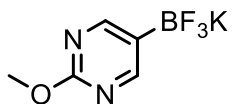

**1s**

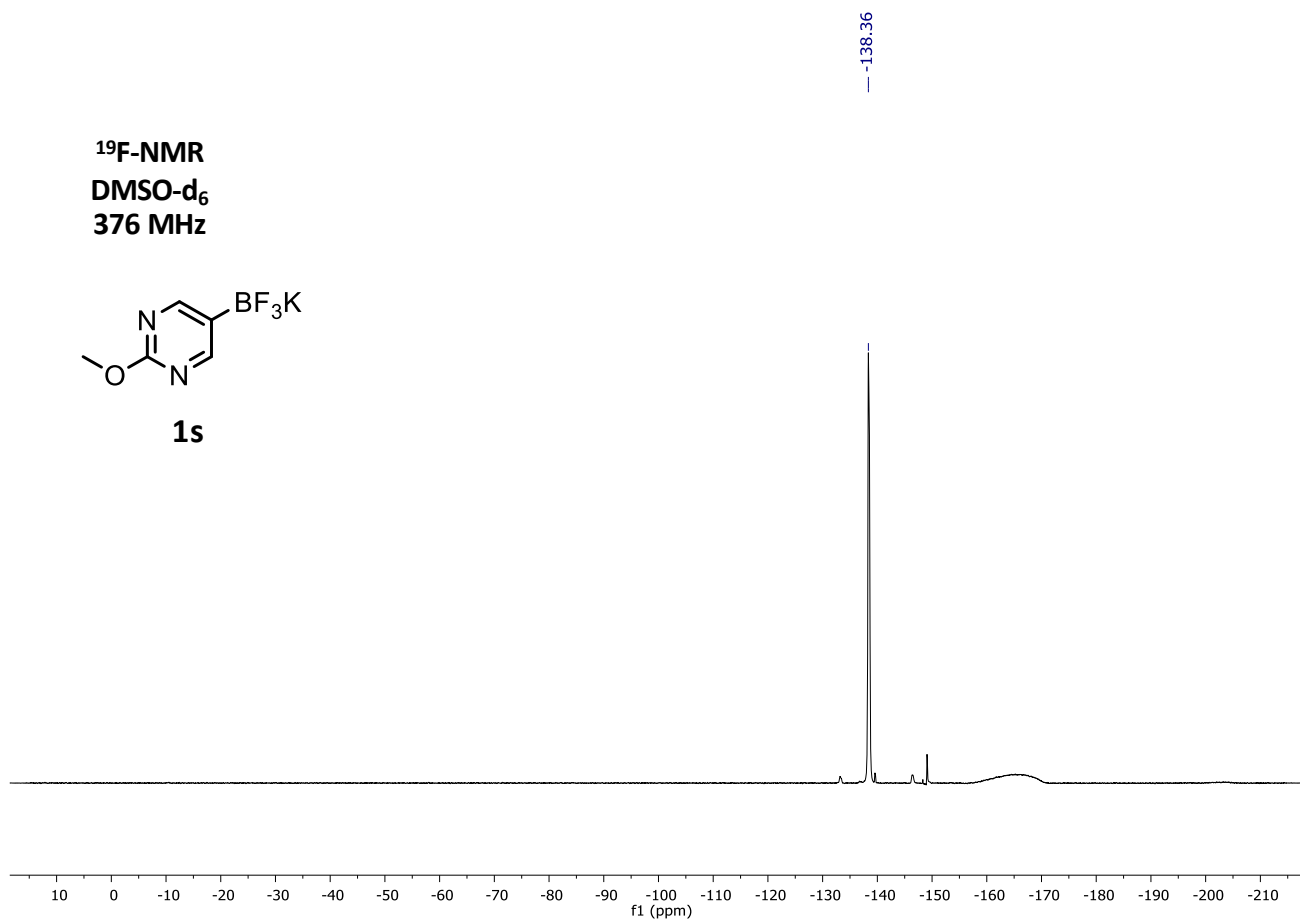

**<sup>11</sup>B-NMR**  
**DMSO-d<sub>6</sub>**  
**128 MHz**

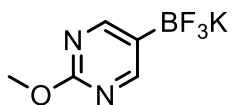

**1s**

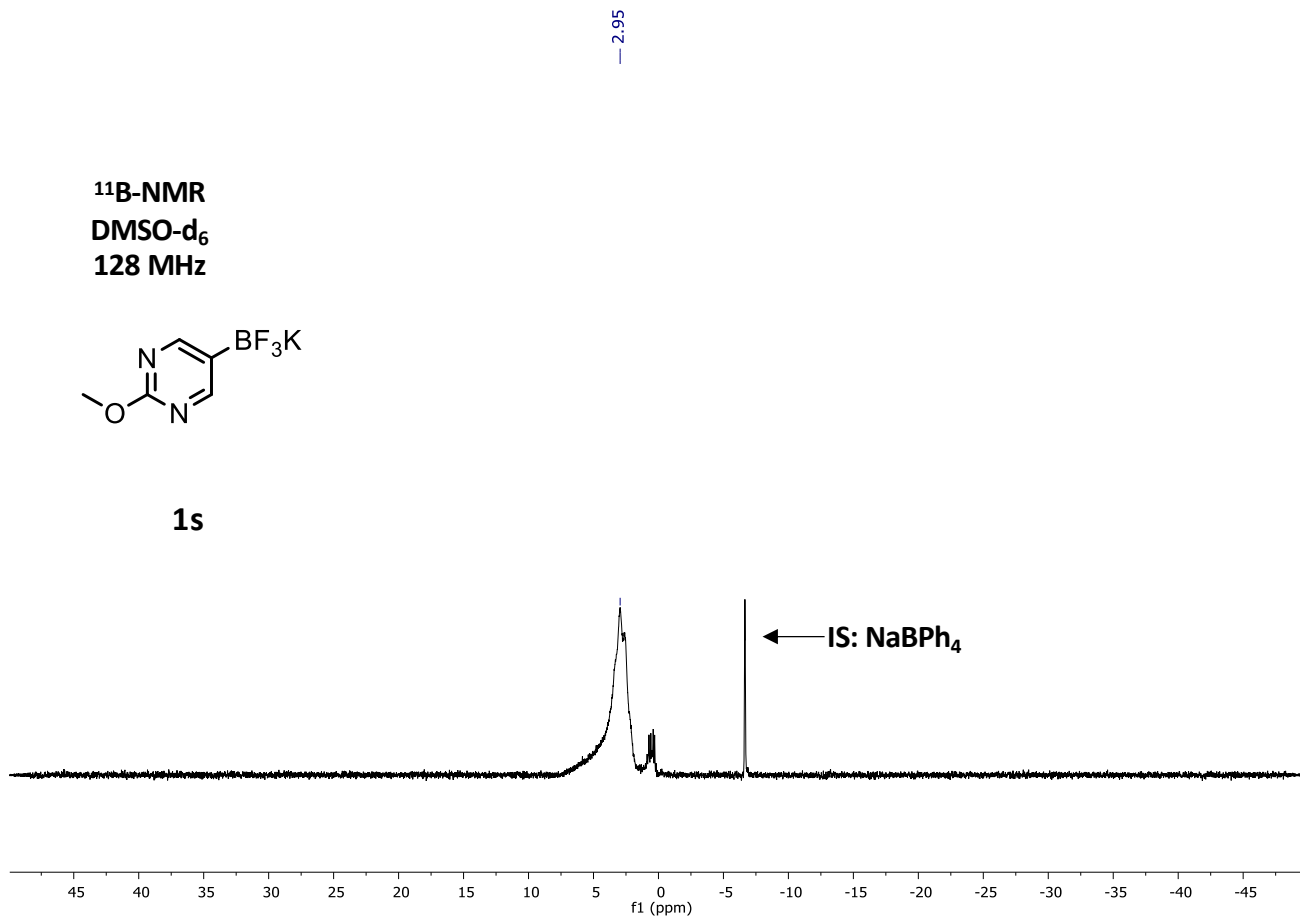

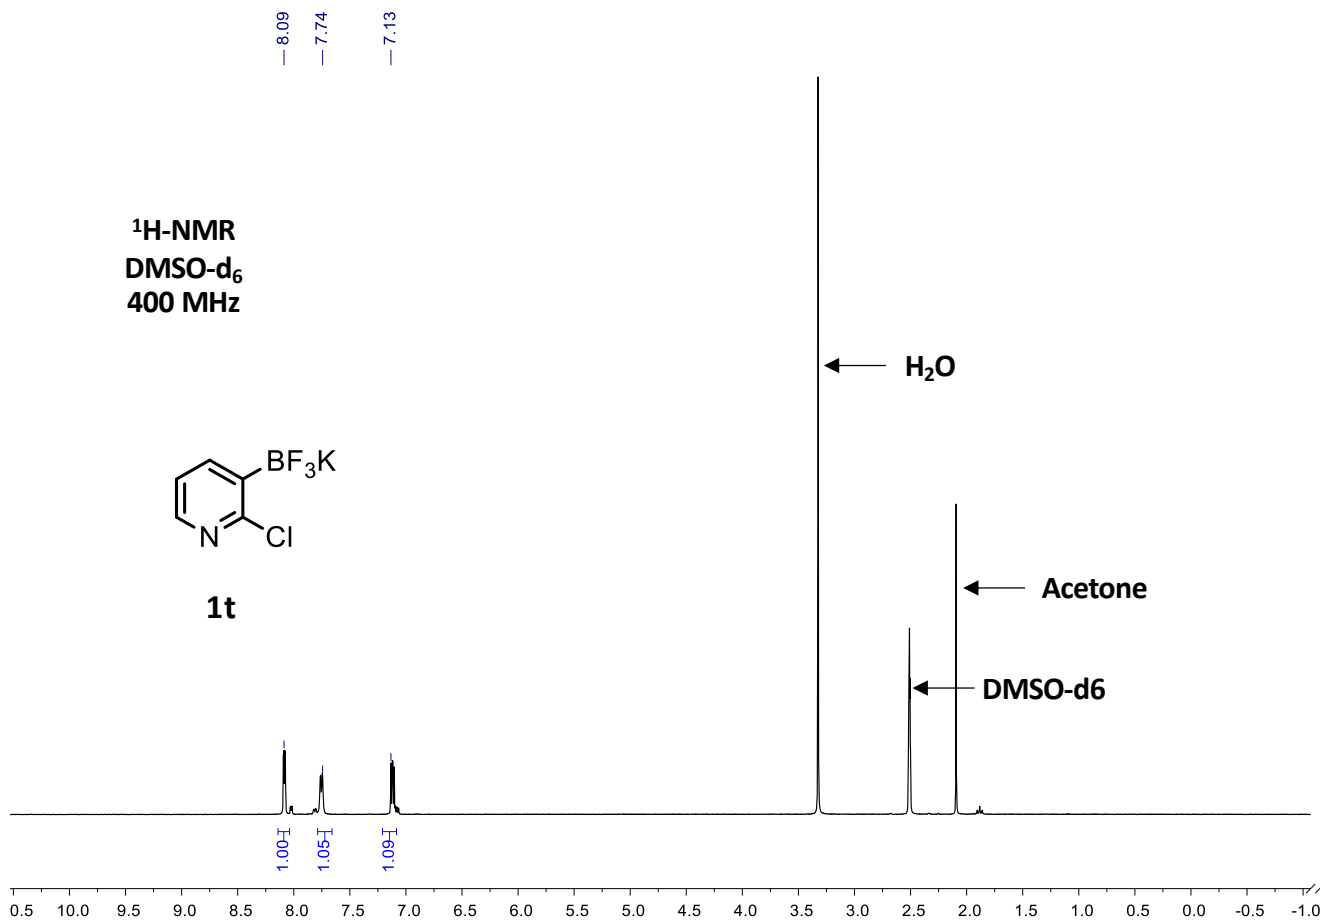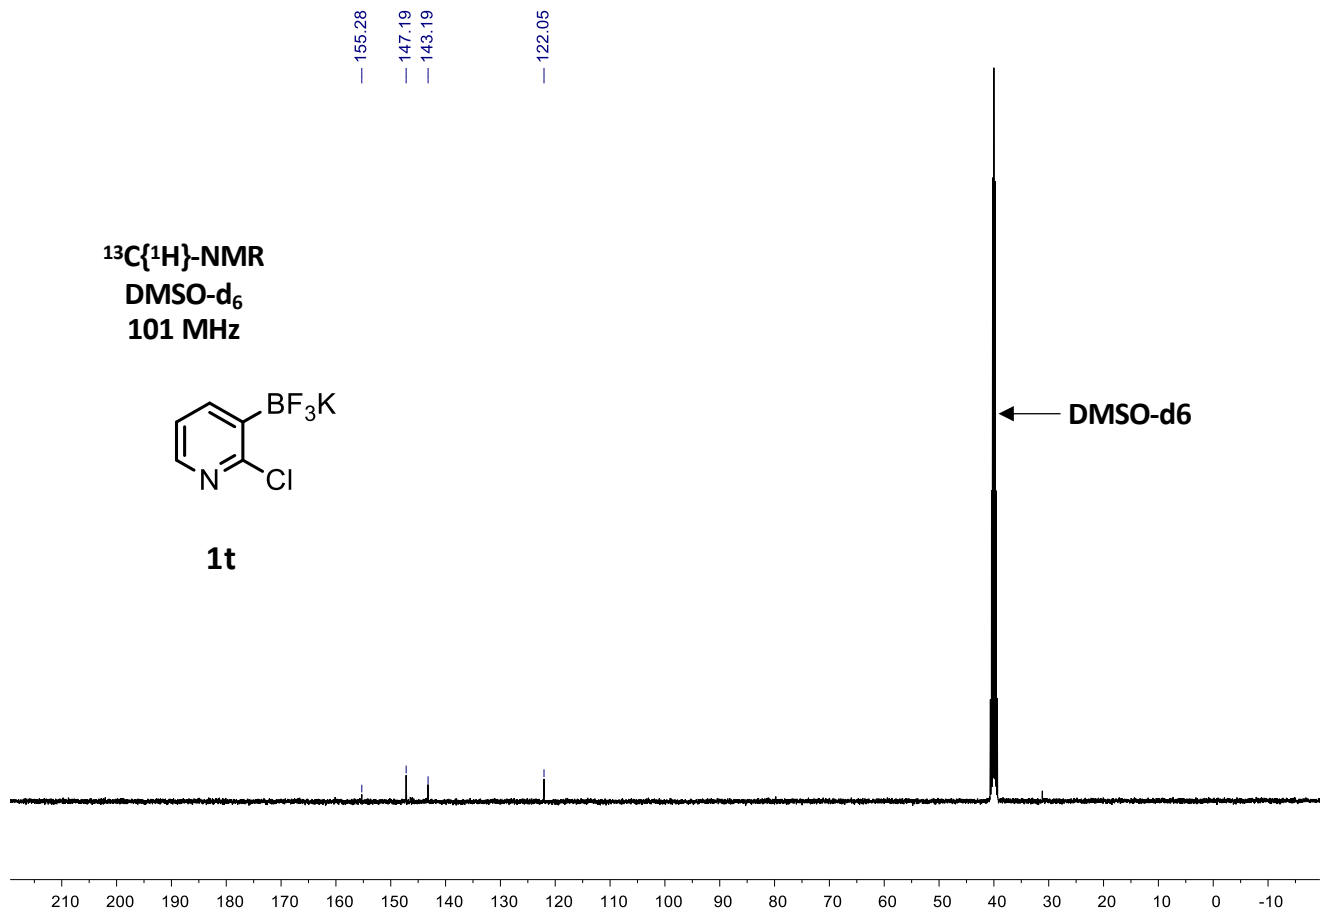

**<sup>19</sup>F-NMR**  
**DMSO-d<sub>6</sub>**  
**376 MHz**

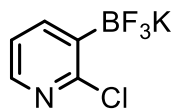

**1t**

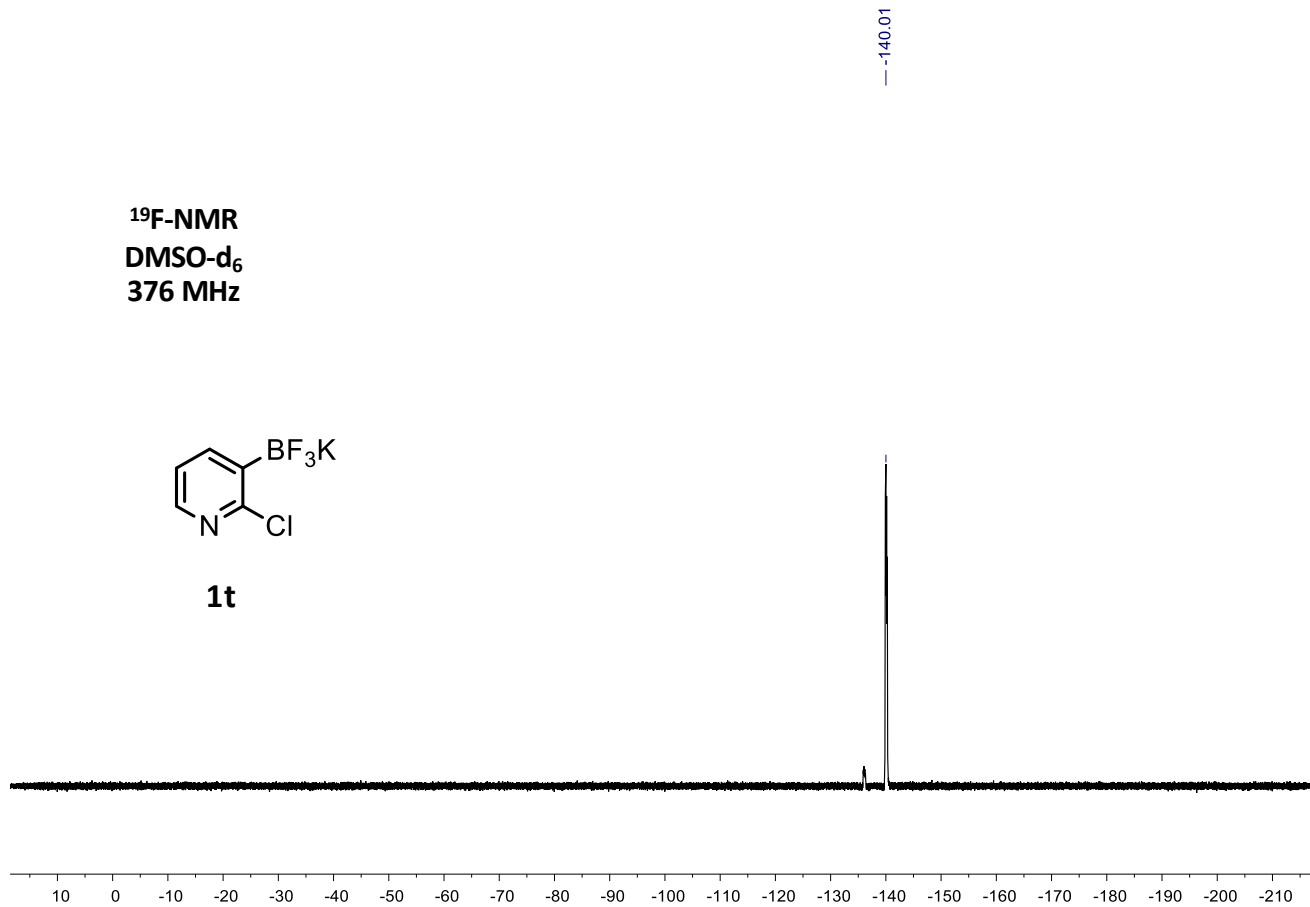

2.57  
2.20  
1.83  
1.46

**<sup>11</sup>B-NMR**  
**DMSO-d<sub>6</sub>**  
**128 MHz**

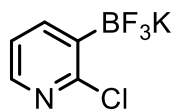

**1t**

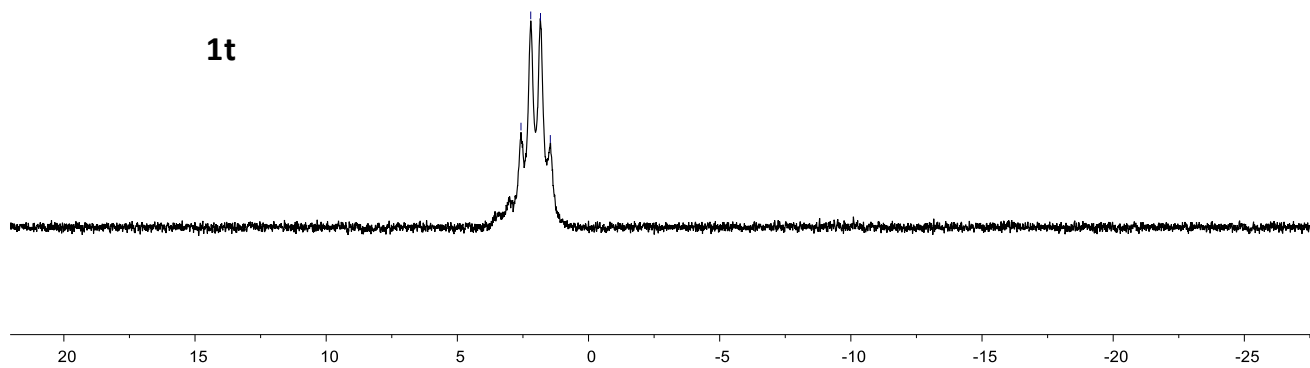

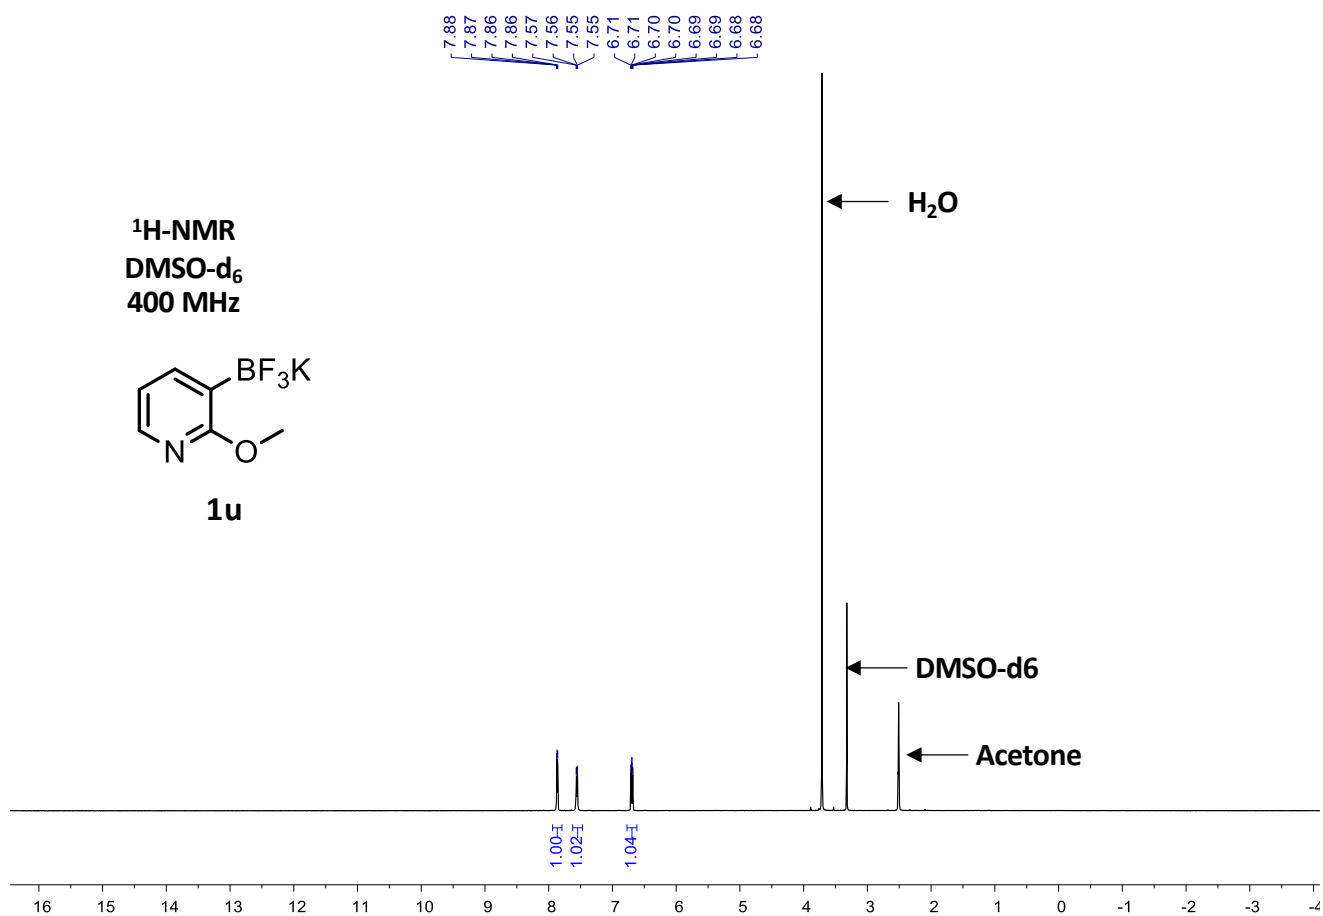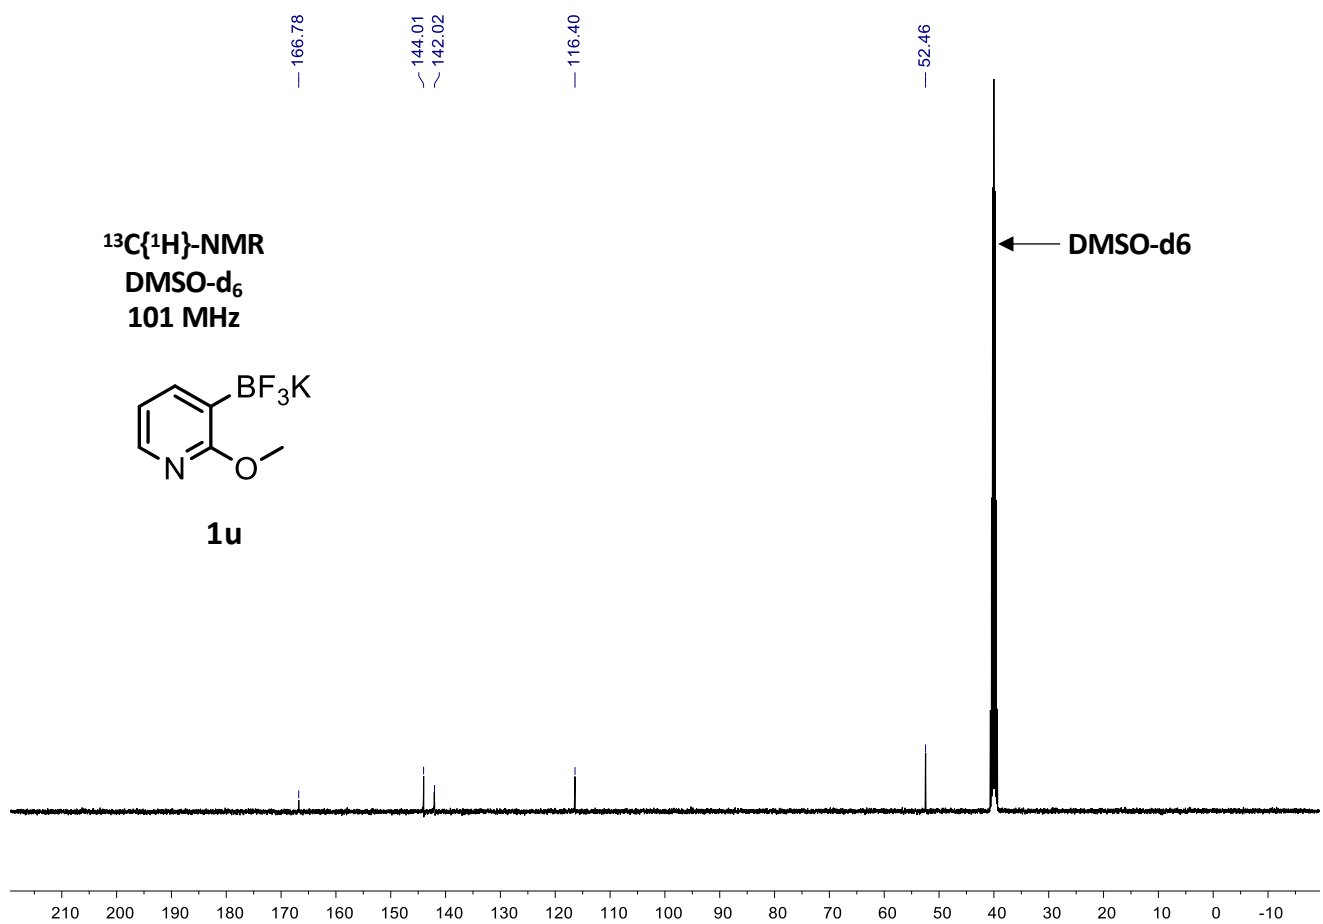

**<sup>19</sup>F-NMR**  
**DMSO-d<sub>6</sub>**  
**376 MHz**

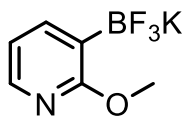

**1u**

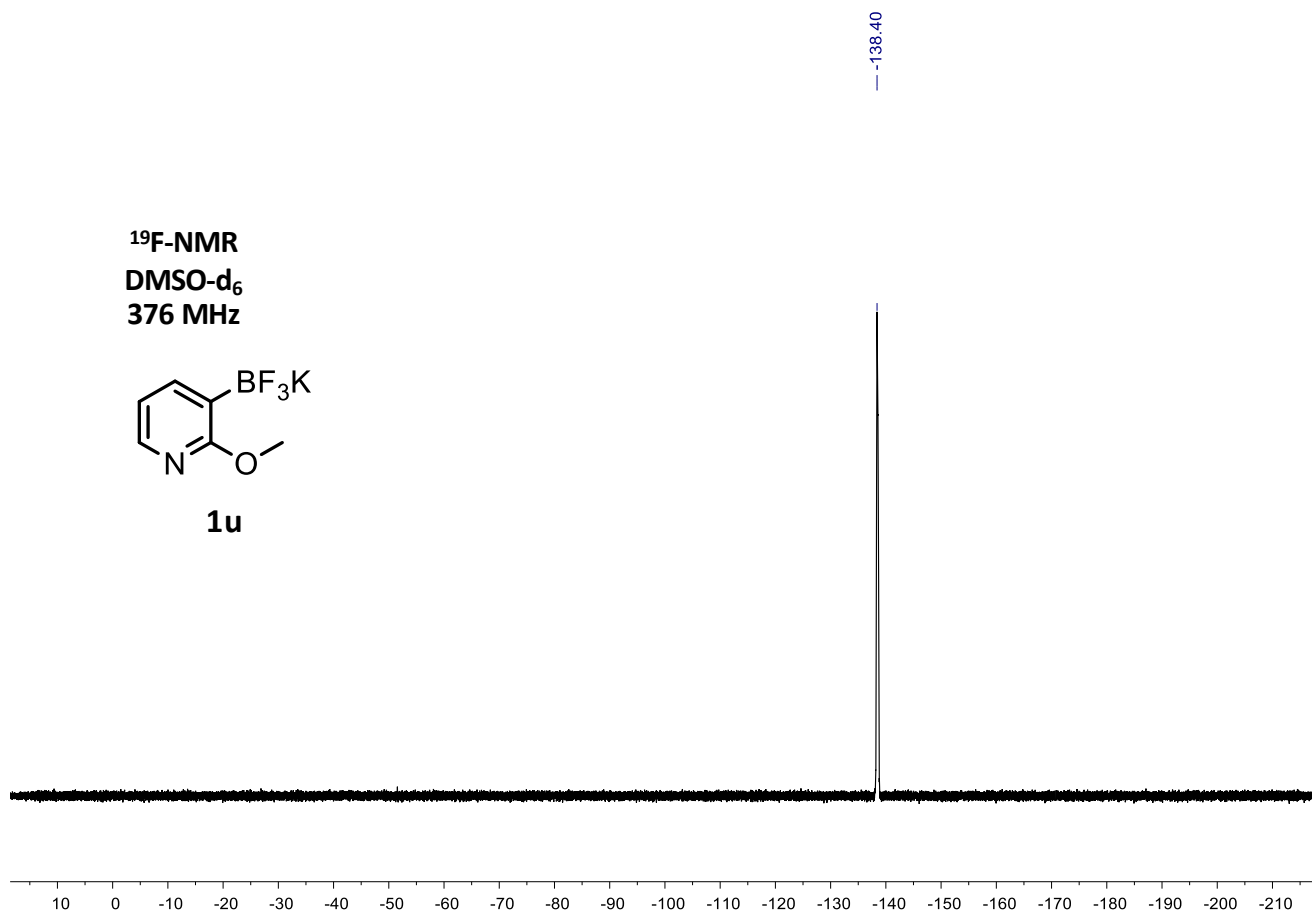

**<sup>11</sup>B-NMR**  
**DMSO-d<sub>6</sub>**  
**128 MHz**

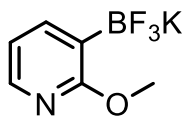

**1u**

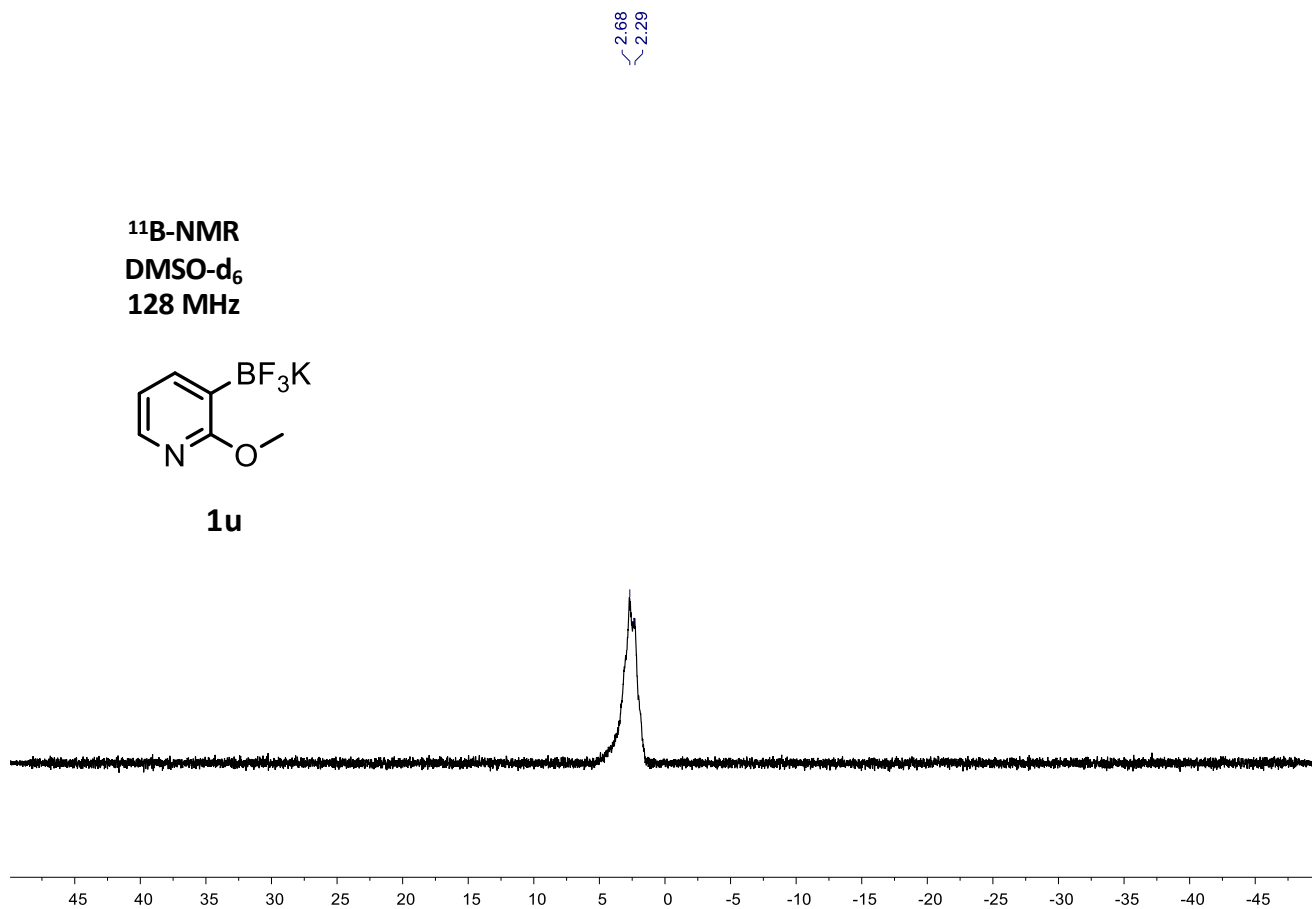

7.58  
7.58  
7.57  
7.57  
7.56  
7.56  
7.55  
7.55  
7.55  
7.54  
7.54  
7.52  
7.52  
7.51  
7.48  
7.48  
7.47  
7.47  
7.46  
7.46  
7.46  
7.45  
7.44  
7.44  
7.44  
7.43  
7.43  
7.41  
7.41  
7.40  
7.39  
7.39  
7.39  
7.38  
7.37  
7.37  
7.37  
7.36  
7.35  
7.35

**<sup>1</sup>H-NMR**  
**CDCl<sub>3</sub>**  
**400 MHz**

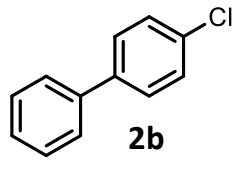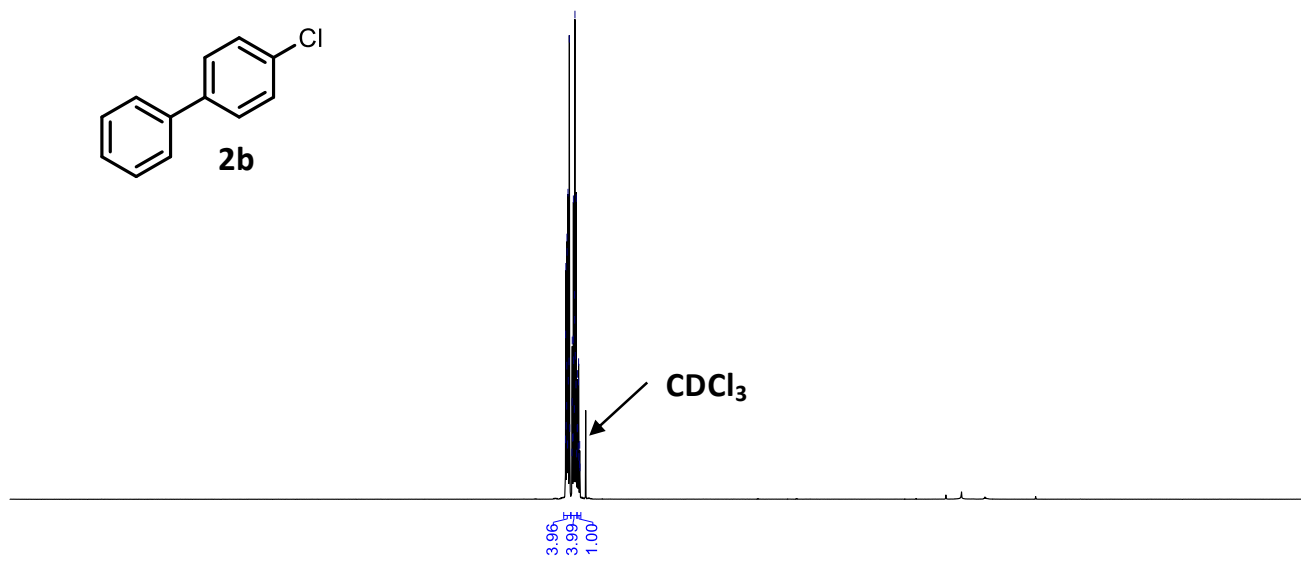

**<sup>13</sup>C{<sup>1</sup>H}-NMR**  
**CDCl<sub>3</sub>**  
**101 MHz**

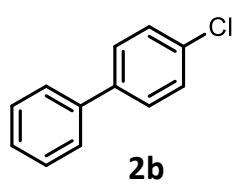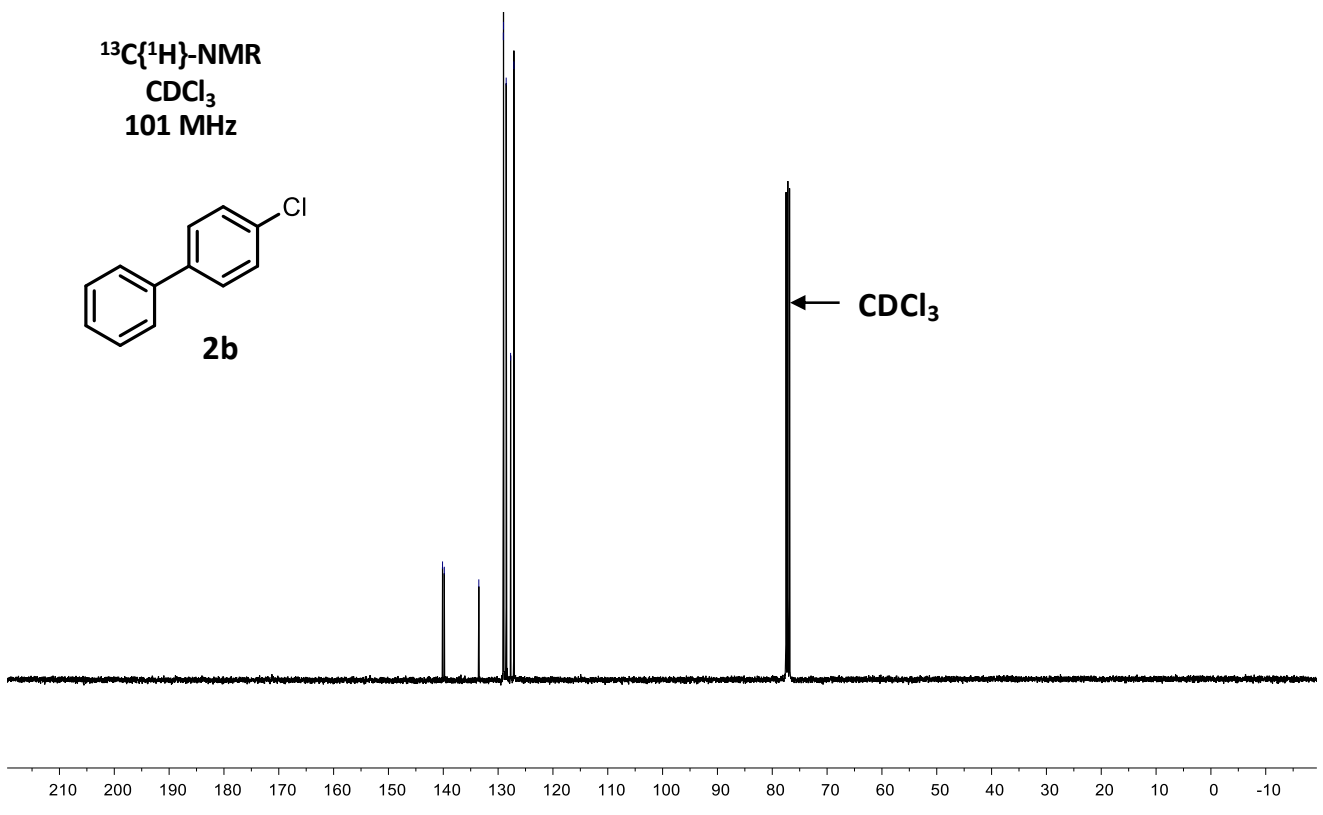



### Gas Chromatogram

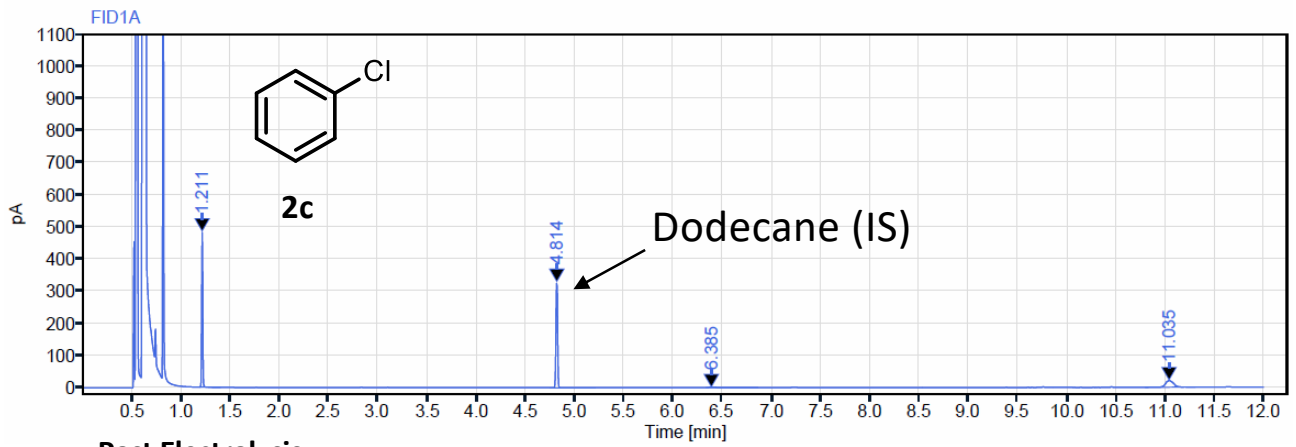

### Post Electrolysis

Signal: FID1A

| RT [min] | Type       | Width [min] | Area          | Height | Area% | Name |
|----------|------------|-------------|---------------|--------|-------|------|
| 1.211    | BB         | 0.21        | 382.30        | 483.81 | 44.40 |      |
| 4.814    | BV R       | 0.46        | 343.12        | 328.35 | 39.85 |      |
| 6.385    | BV         | 0.53        | 13.25         | 0.83   | 1.54  |      |
| 11.035   | VV R       | 0.51        | 122.28        | 20.84  | 14.20 |      |
|          | <b>Sum</b> |             | <b>860.95</b> |        |       |      |

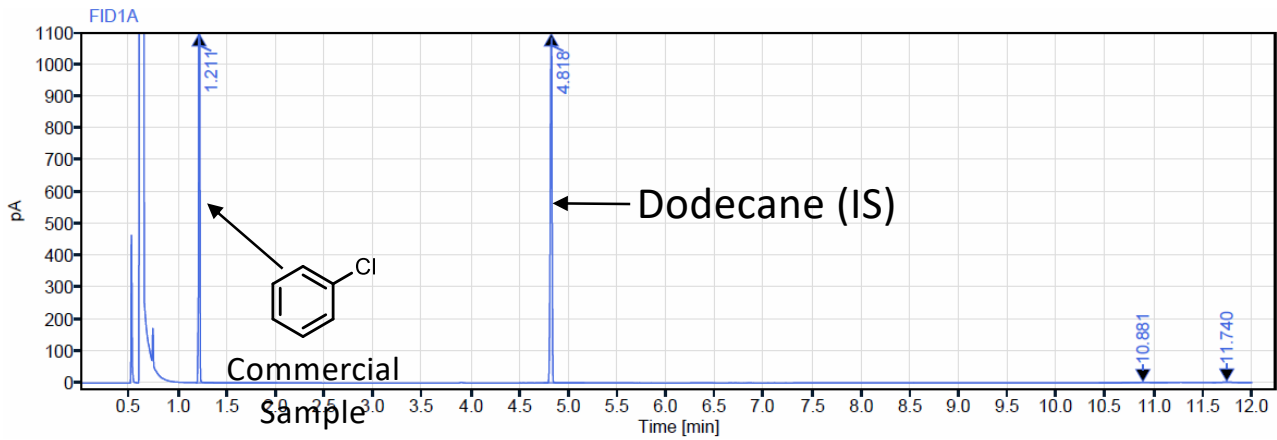

Signal: FID1A

| RT [min] | Type       | Width [min] | Area           | Height  | Area% | Name |
|----------|------------|-------------|----------------|---------|-------|------|
| 1.211    | VB         | 0.83        | 1240.88        | 1544.28 | 49.77 |      |
| 4.818    | BV R       | 0.42        | 1223.86        | 1103.92 | 49.09 |      |
| 10.881   | VV R       | 0.70        | 13.92          | 1.07    | 0.56  |      |
| 11.740   | BB         | 0.39        | 14.50          | 2.06    | 0.58  |      |
|          | <b>Sum</b> |             | <b>2493.16</b> |         |       |      |

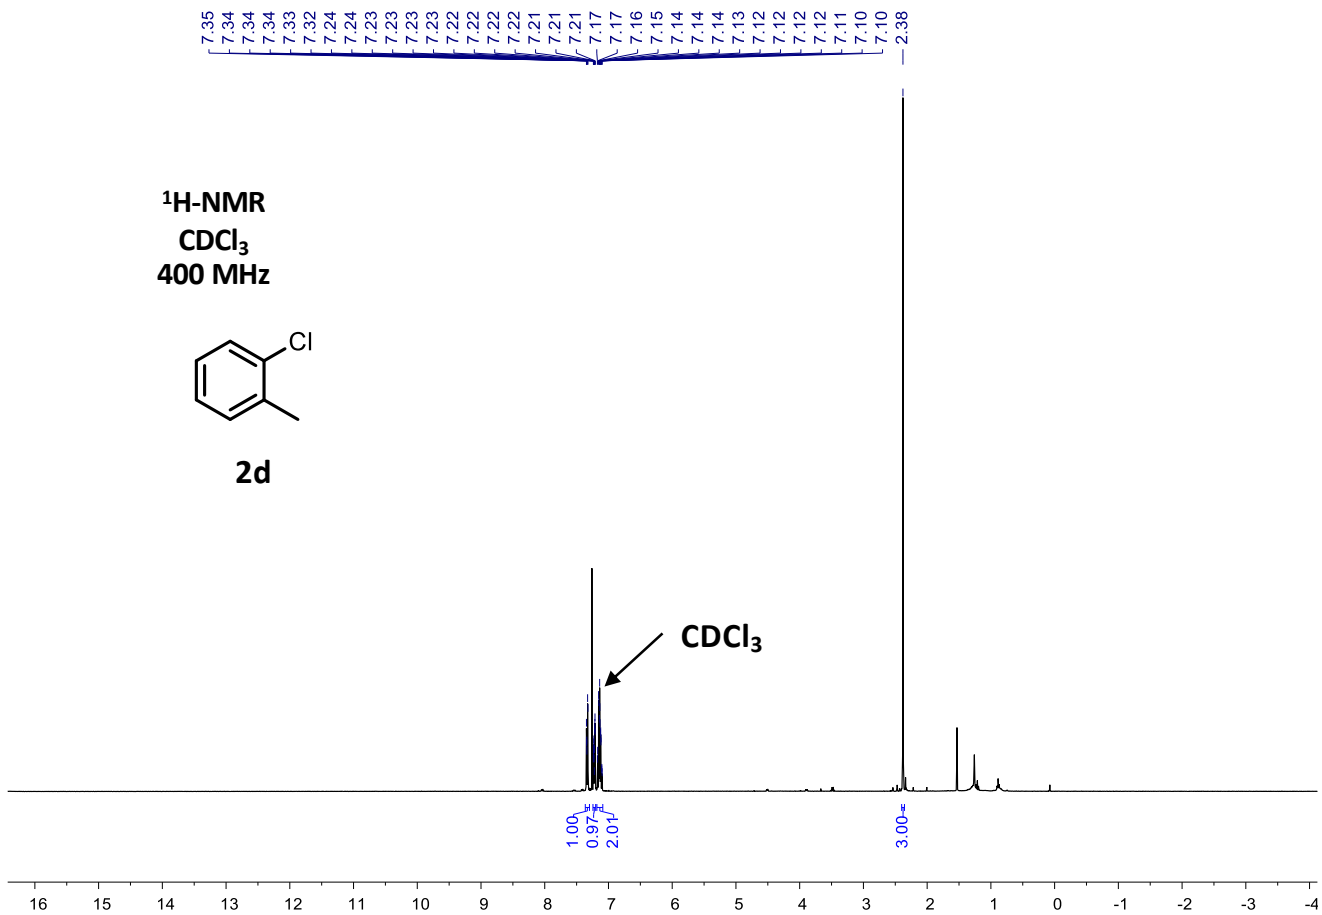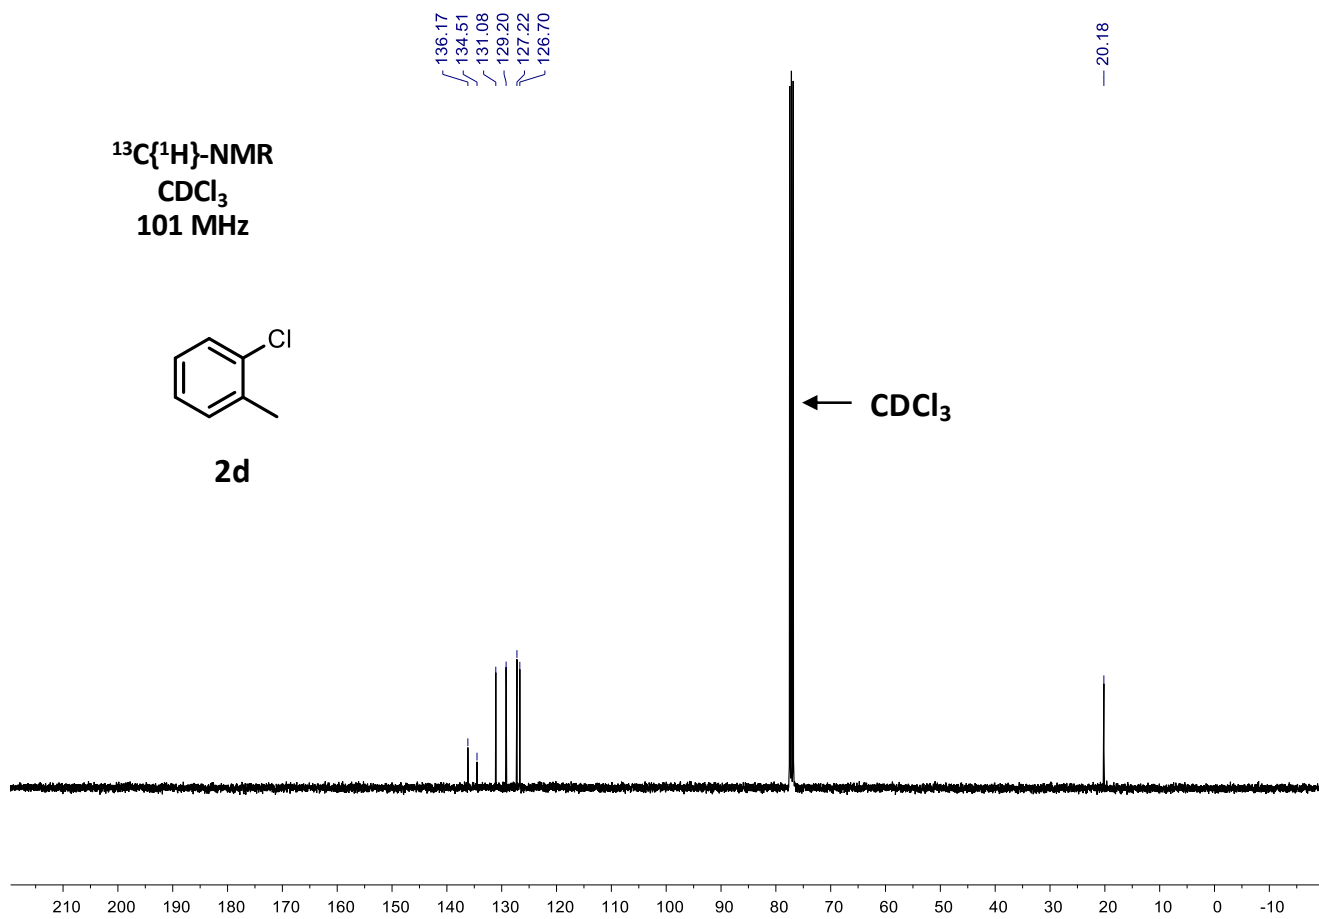

<sup>1</sup>H-NMR  
CDCl<sub>3</sub>  
400 MHz

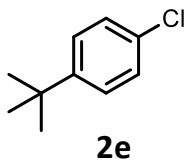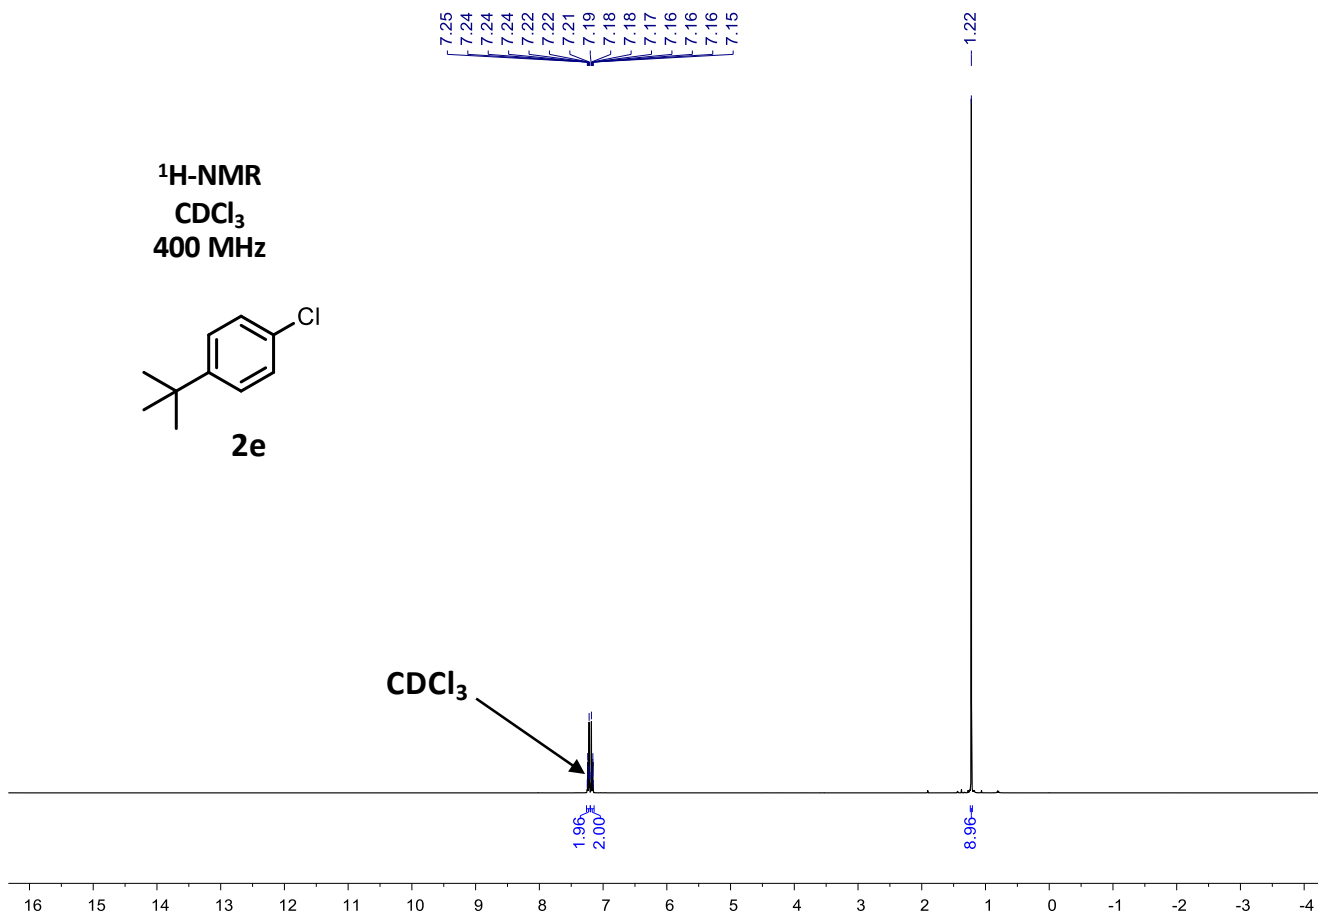

<sup>13</sup>C{<sup>1</sup>H}-NMR  
CDCl<sub>3</sub>  
101 MHz

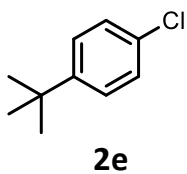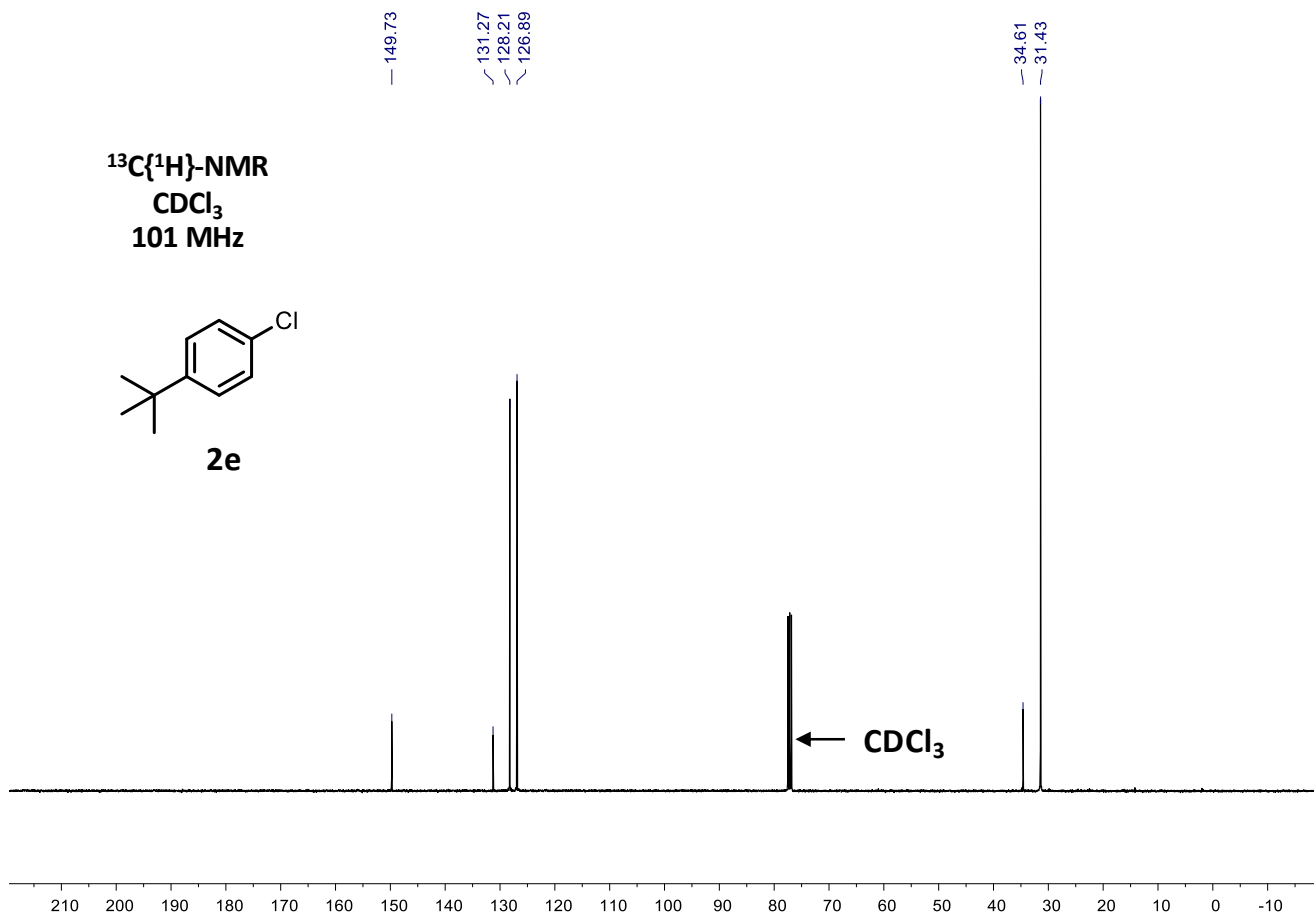

<sup>1</sup>H-NMR  
CDCl<sub>3</sub>  
400 MHz

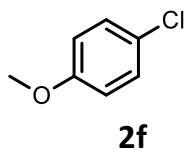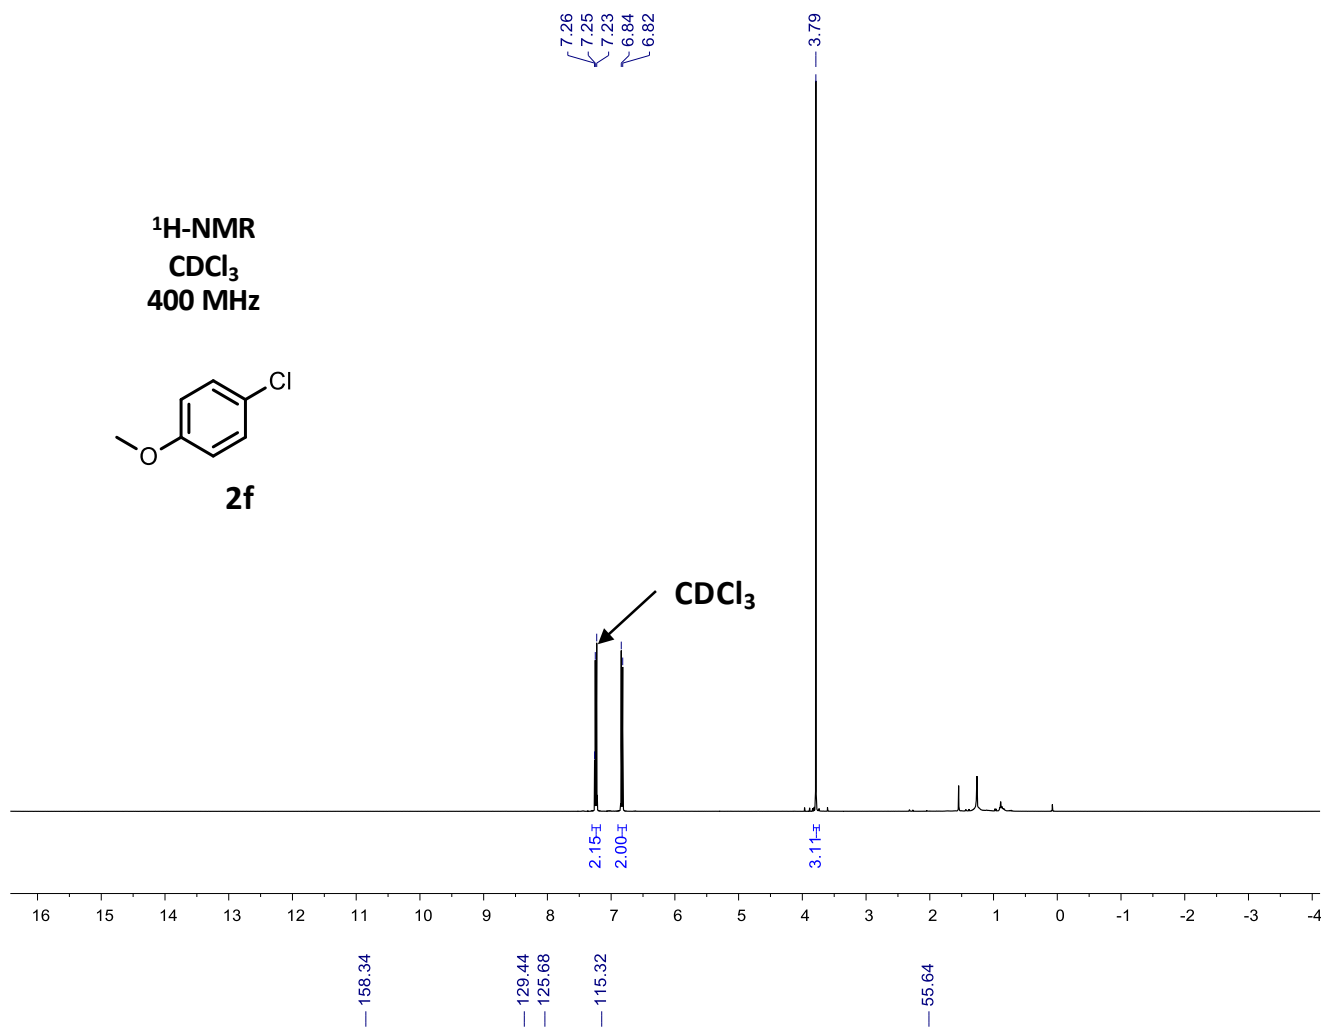

<sup>13</sup>C{<sup>1</sup>H}-NMR  
CDCl<sub>3</sub>  
101 MHz

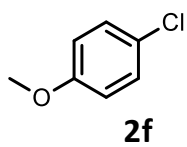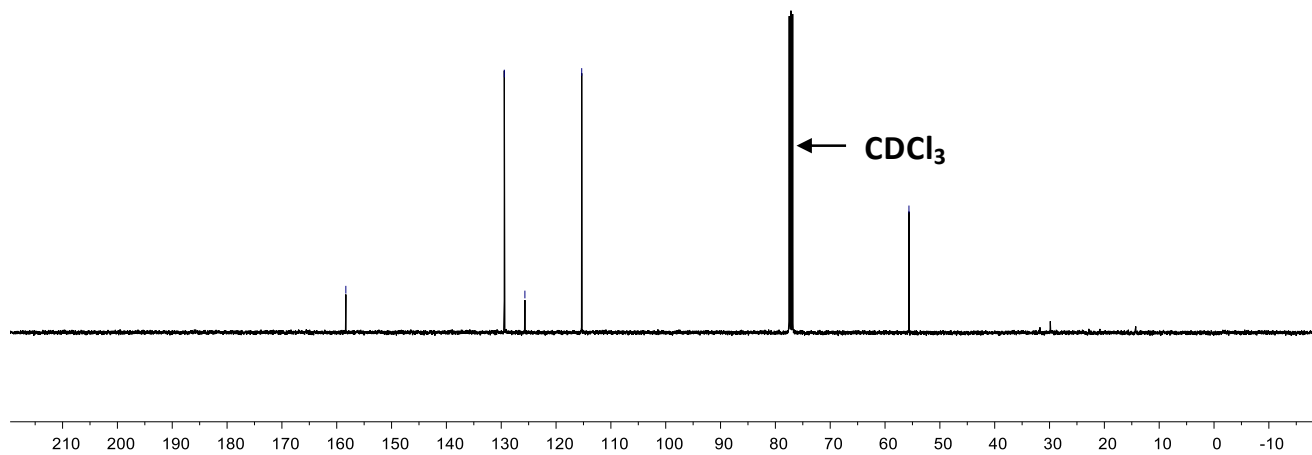

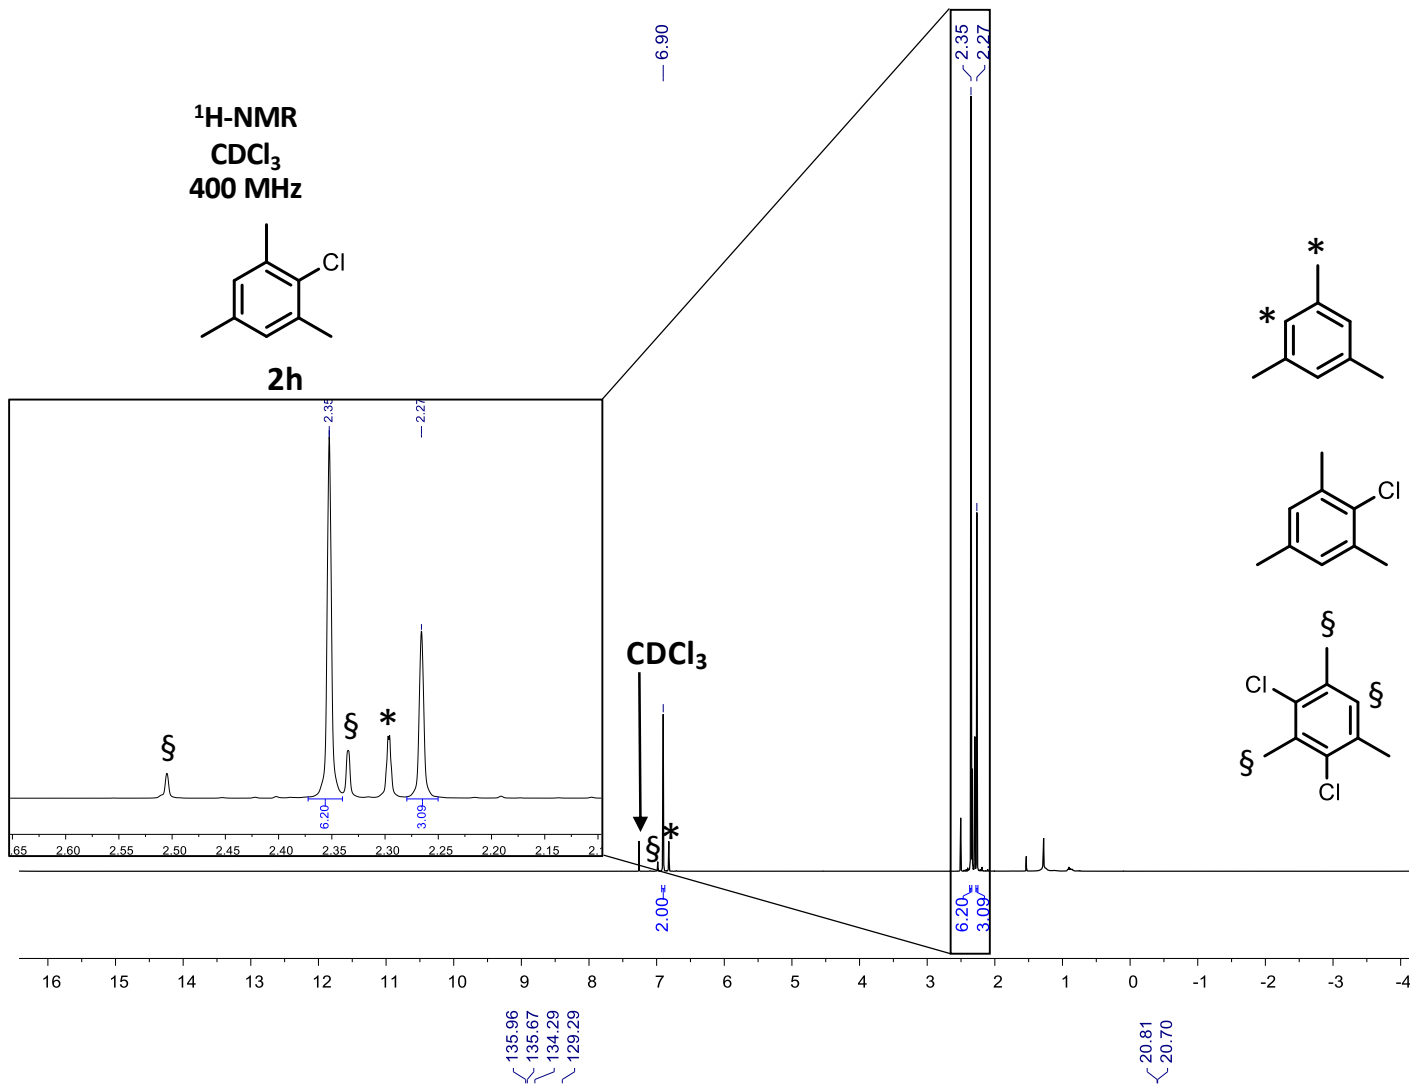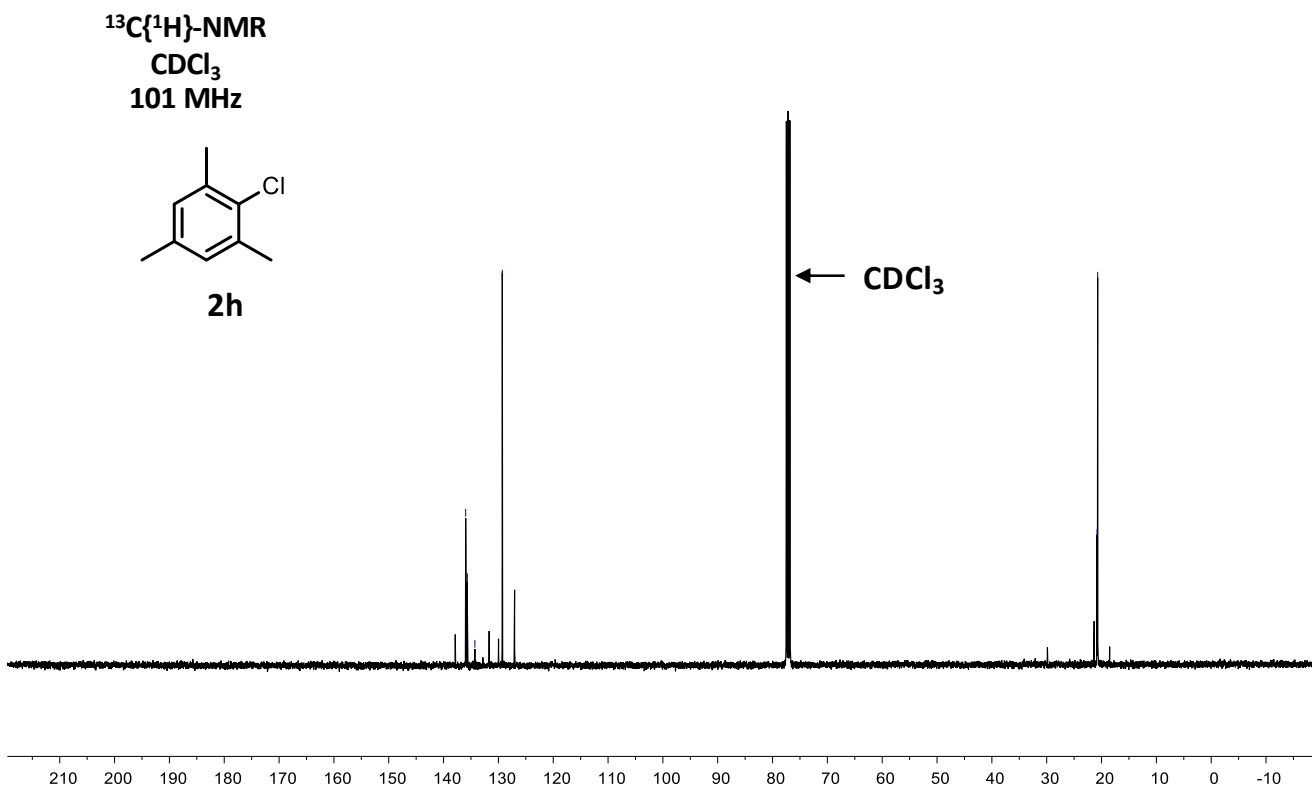

**<sup>19</sup>F-NMR**  
**CDCl<sub>3</sub>**  
**376 MHz**

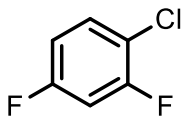

**2i**

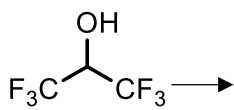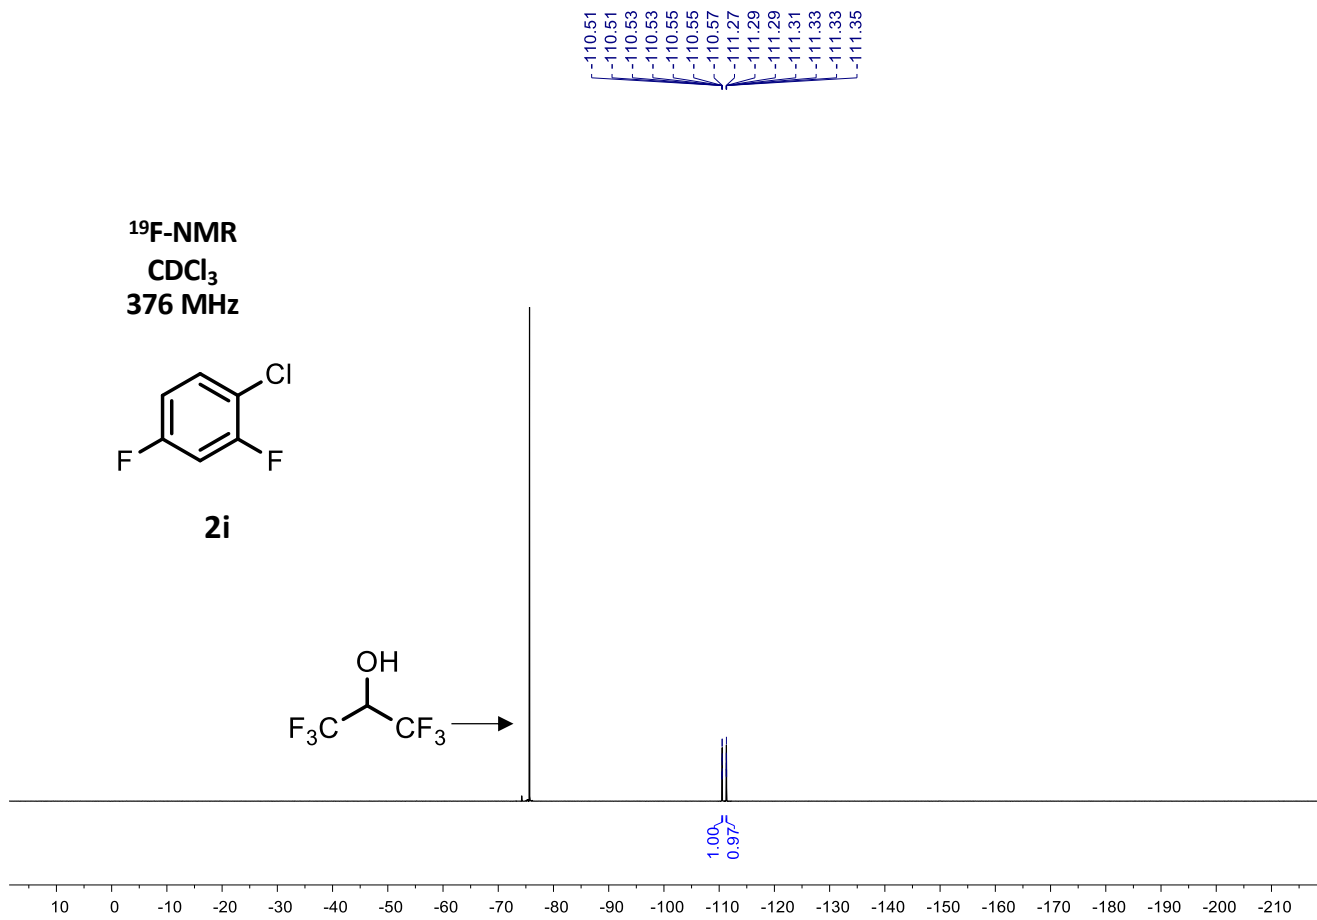

7.44  
7.43  
7.42  
7.41  
7.41  
7.40  
7.23  
7.22  
7.22  
7.21  
7.20  
7.19

<sup>1</sup>H-NMR  
CDCl<sub>3</sub>  
400 MHz

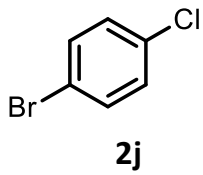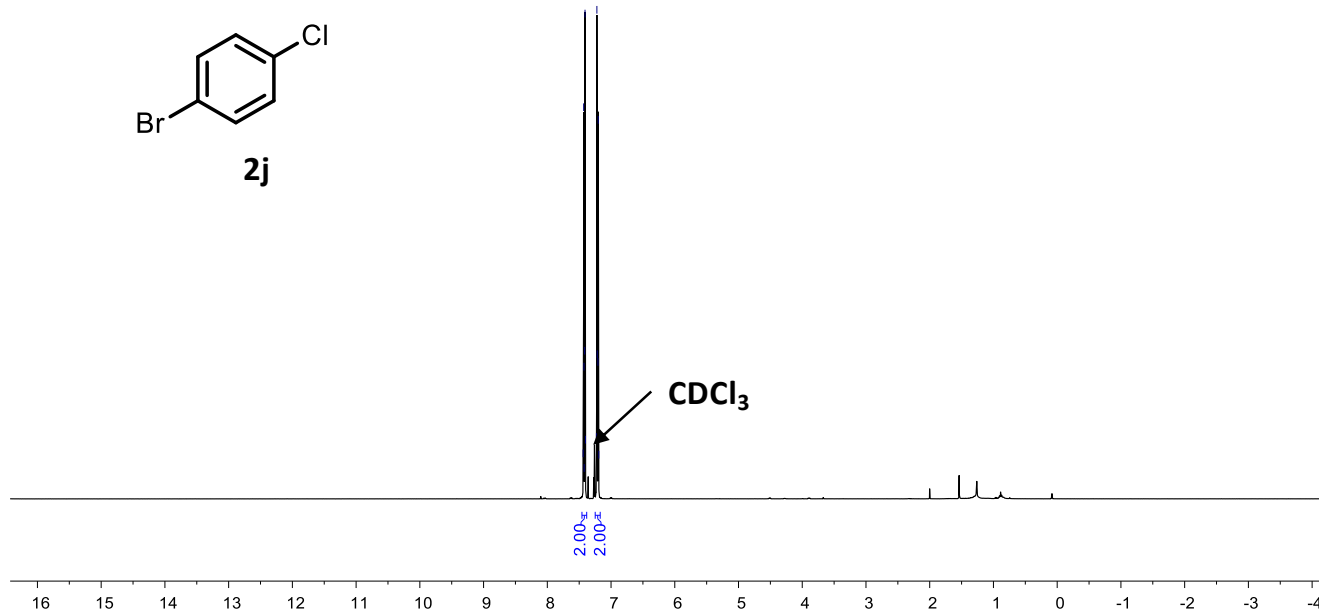

133.35  
132.90  
130.33  
120.40

<sup>13</sup>C{<sup>1</sup>H}-NMR  
CDCl<sub>3</sub>  
101 MHz

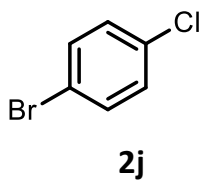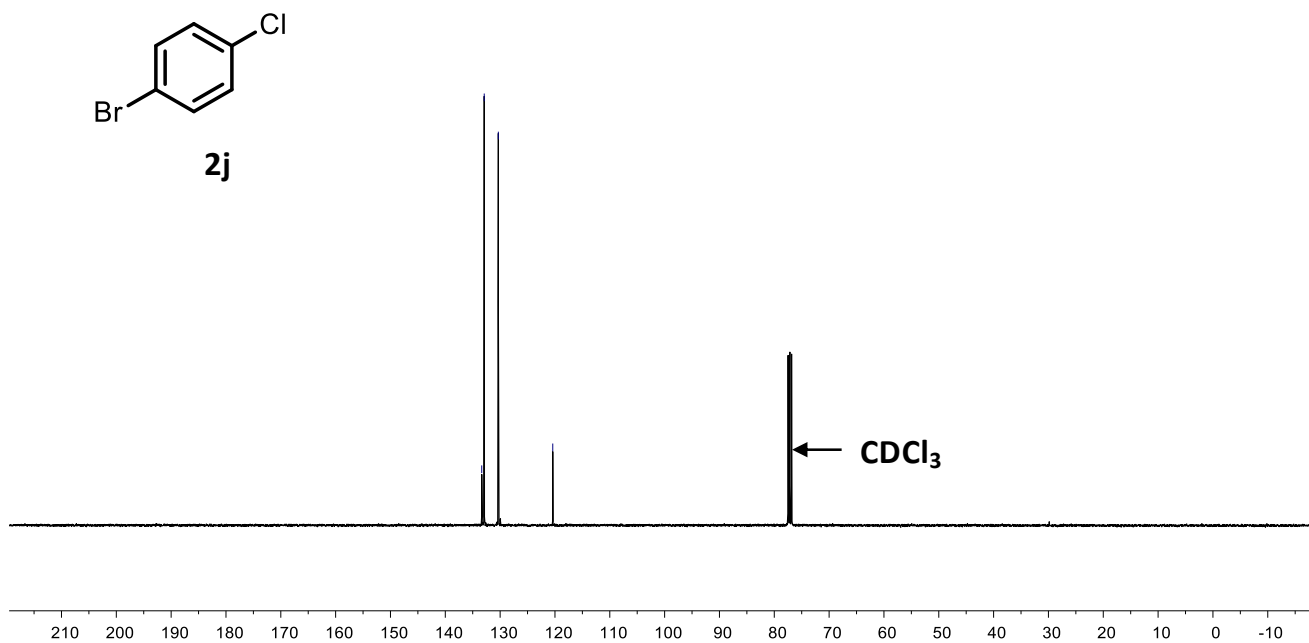

7.63  
7.61  
7.47  
7.46  
7.45  
7.44  
7.27  
7.27  
7.25  
7.25  
7.25  
7.23  
7.23  
7.14  
7.14  
7.12  
7.12  
7.12  
7.12  
7.10  
7.10

<sup>1</sup>H-NMR  
CDCl<sub>3</sub>  
400 MHz

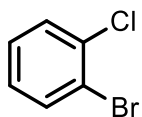

2k

CDCl<sub>3</sub>

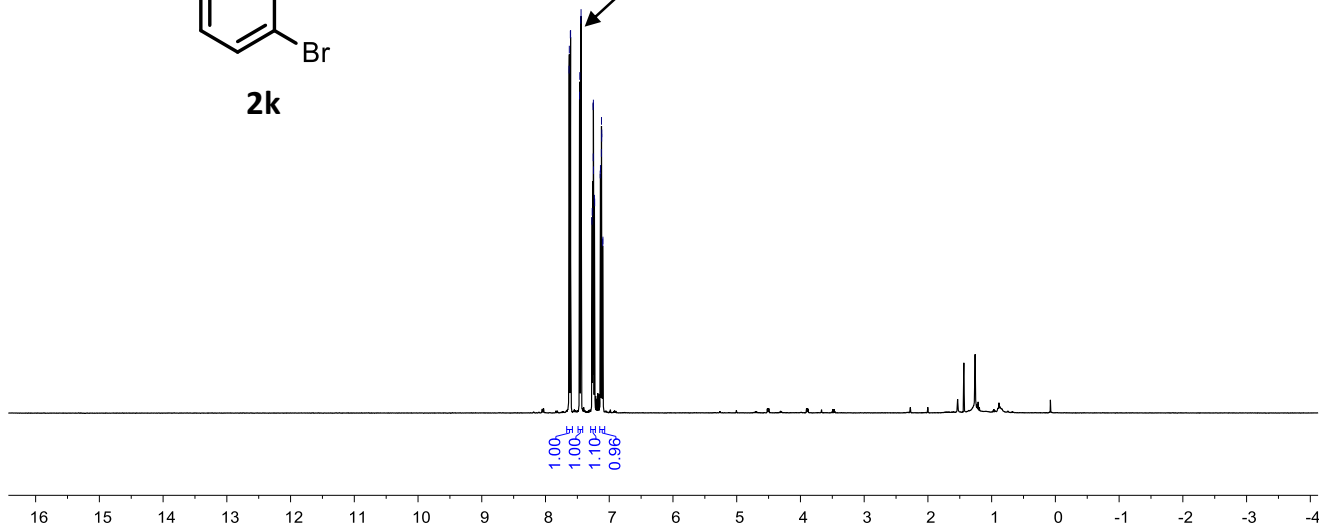

134.64  
133.94  
130.58  
128.55  
128.00  
122.66

<sup>13</sup>C{<sup>1</sup>H}-NMR  
CDCl<sub>3</sub>  
101 MHz

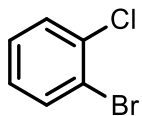

2k

CDCl<sub>3</sub>

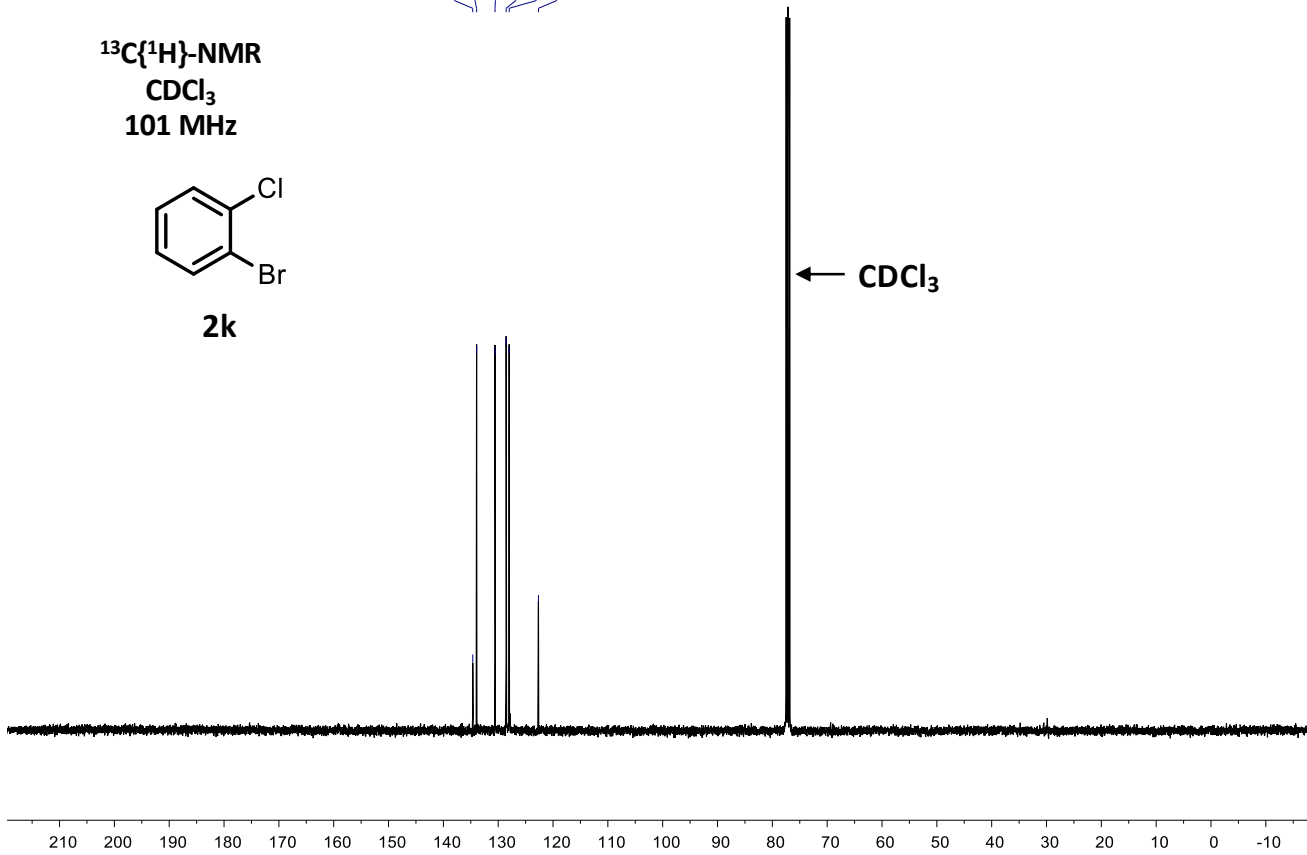



<sup>1</sup>H-NMR  
CDCl<sub>3</sub>  
400 MHz

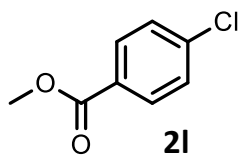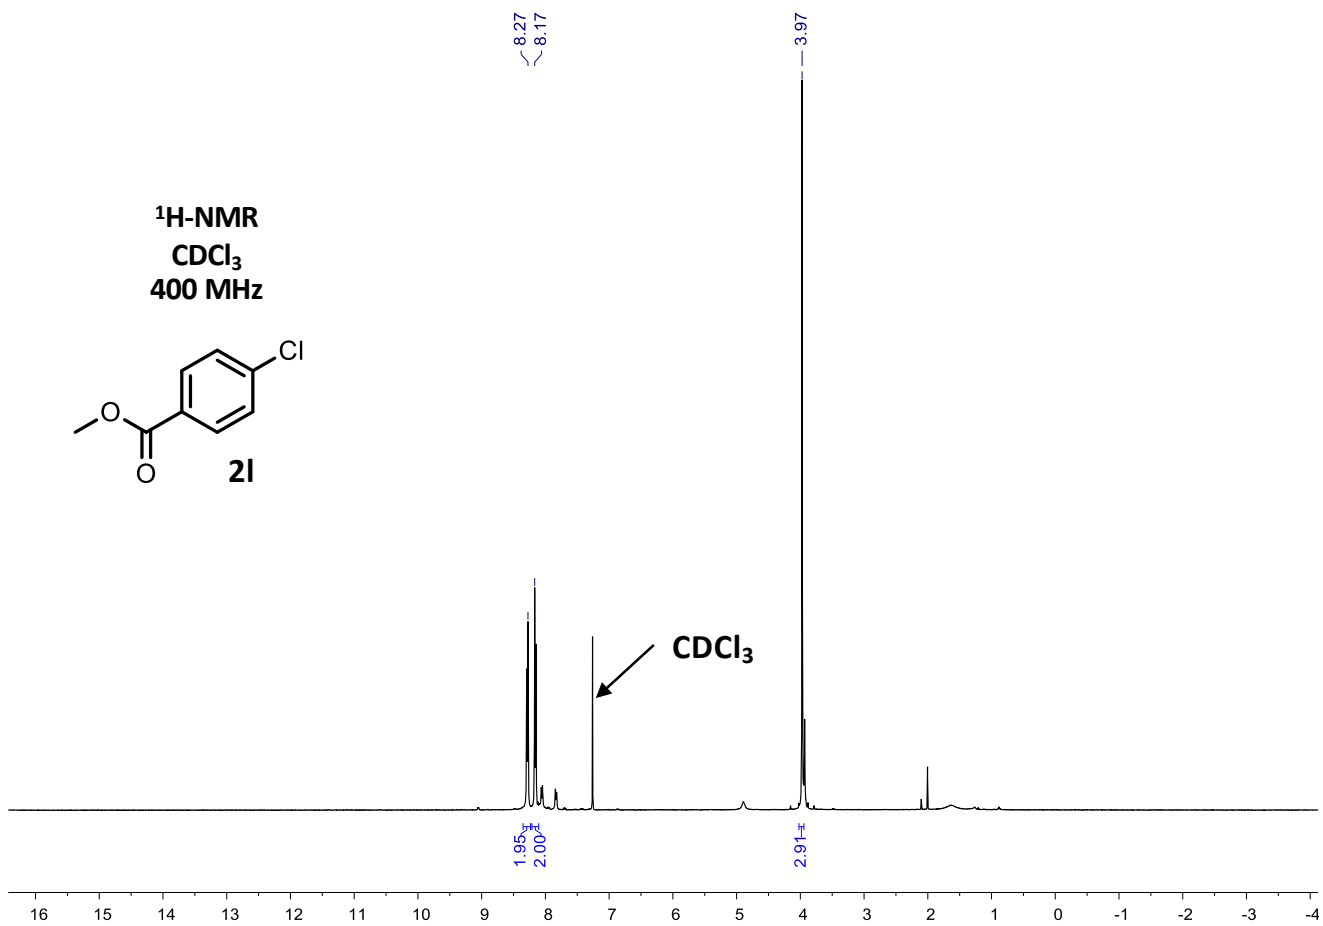

<sup>13</sup>C{<sup>1</sup>H}-NMR  
CDCl<sub>3</sub>  
101 MHz

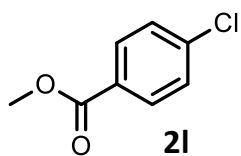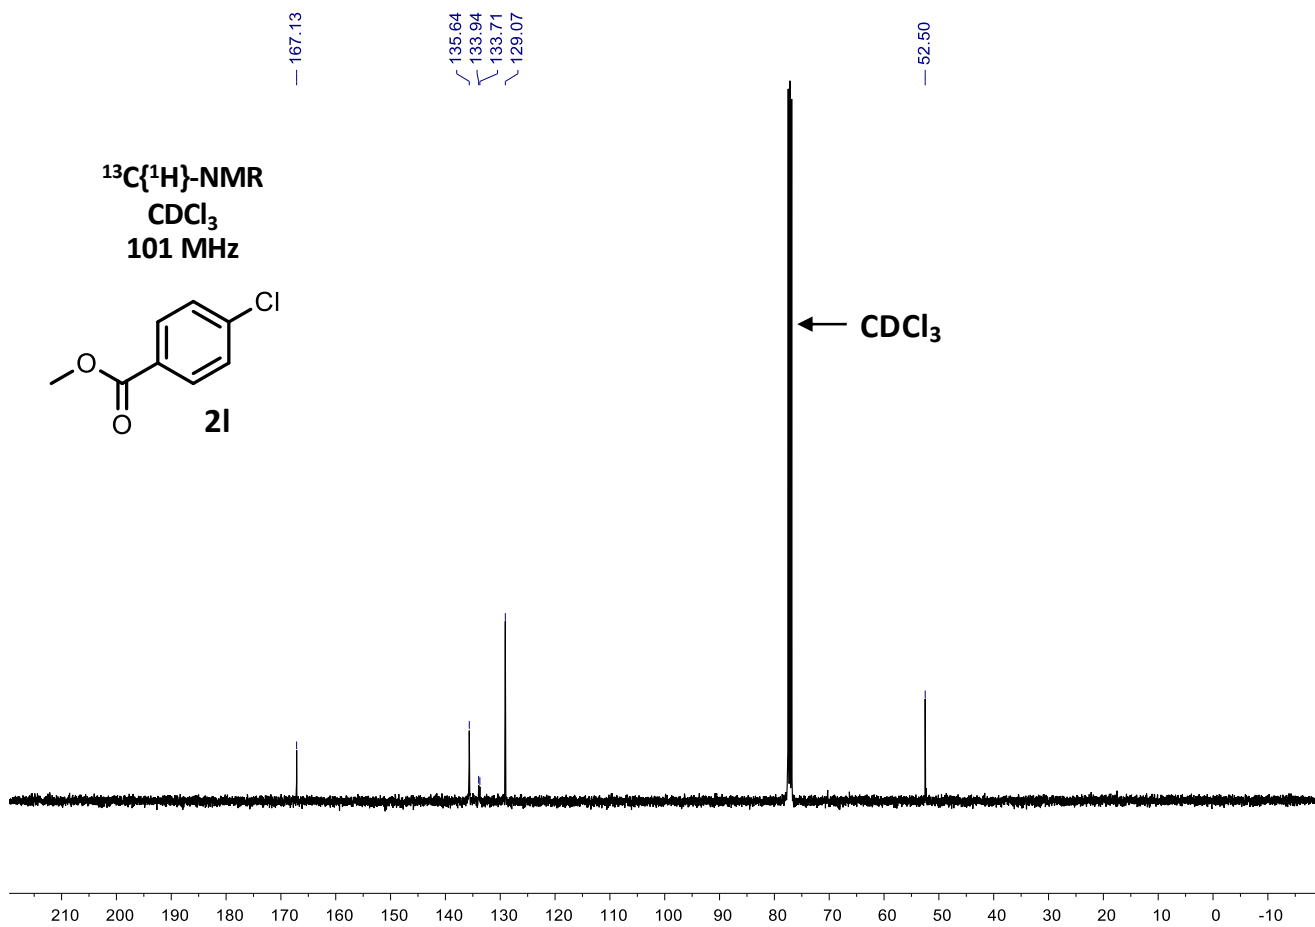

**<sup>1</sup>H-NMR**  
**CDCl<sub>3</sub>**  
**400 MHz**

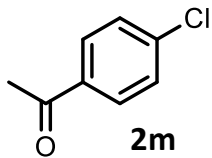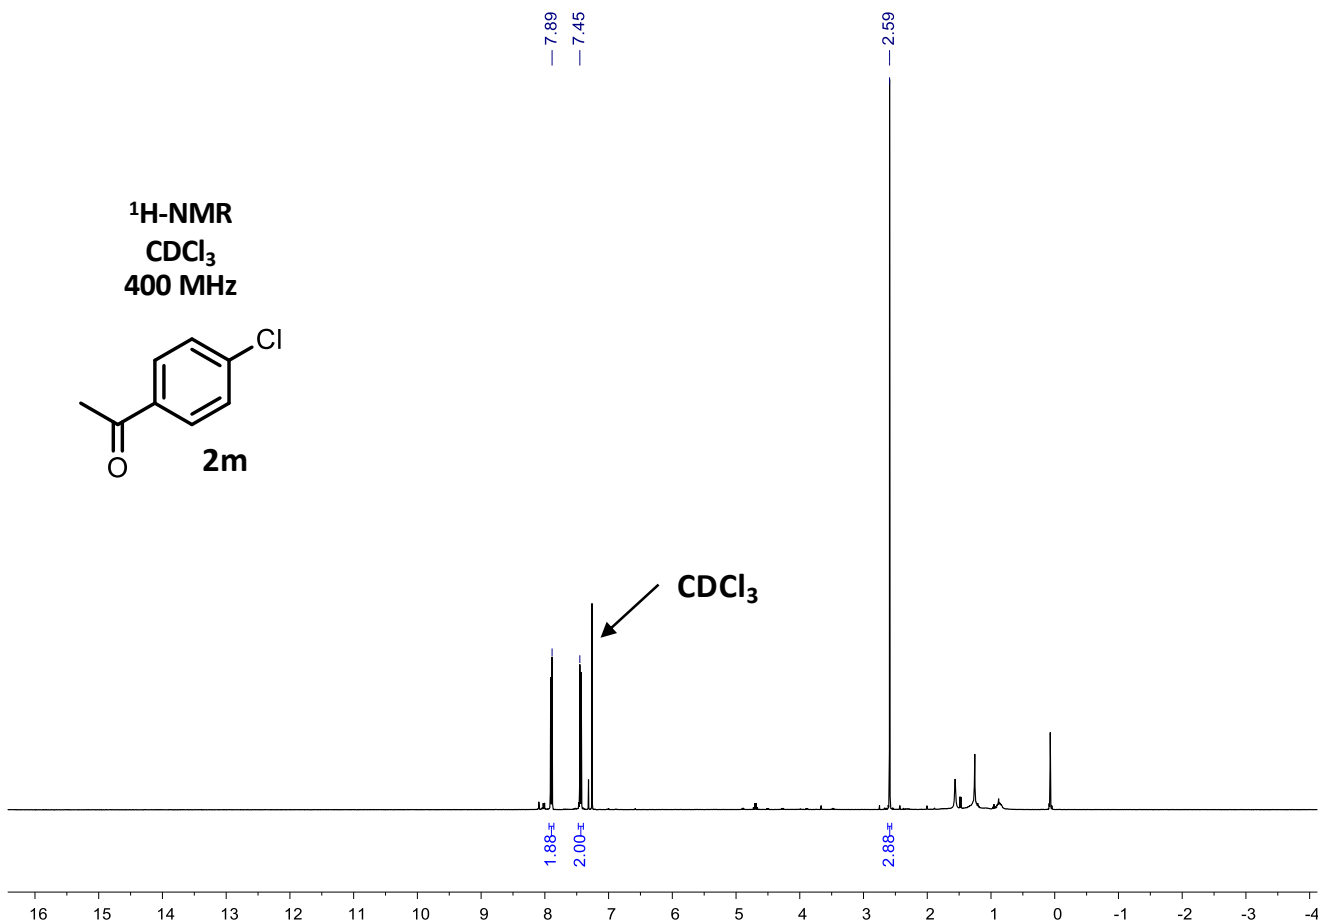

**<sup>13</sup>C{<sup>1</sup>H}-NMR**  
**CDCl<sub>3</sub>**  
**101 MHz**

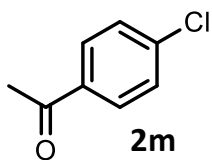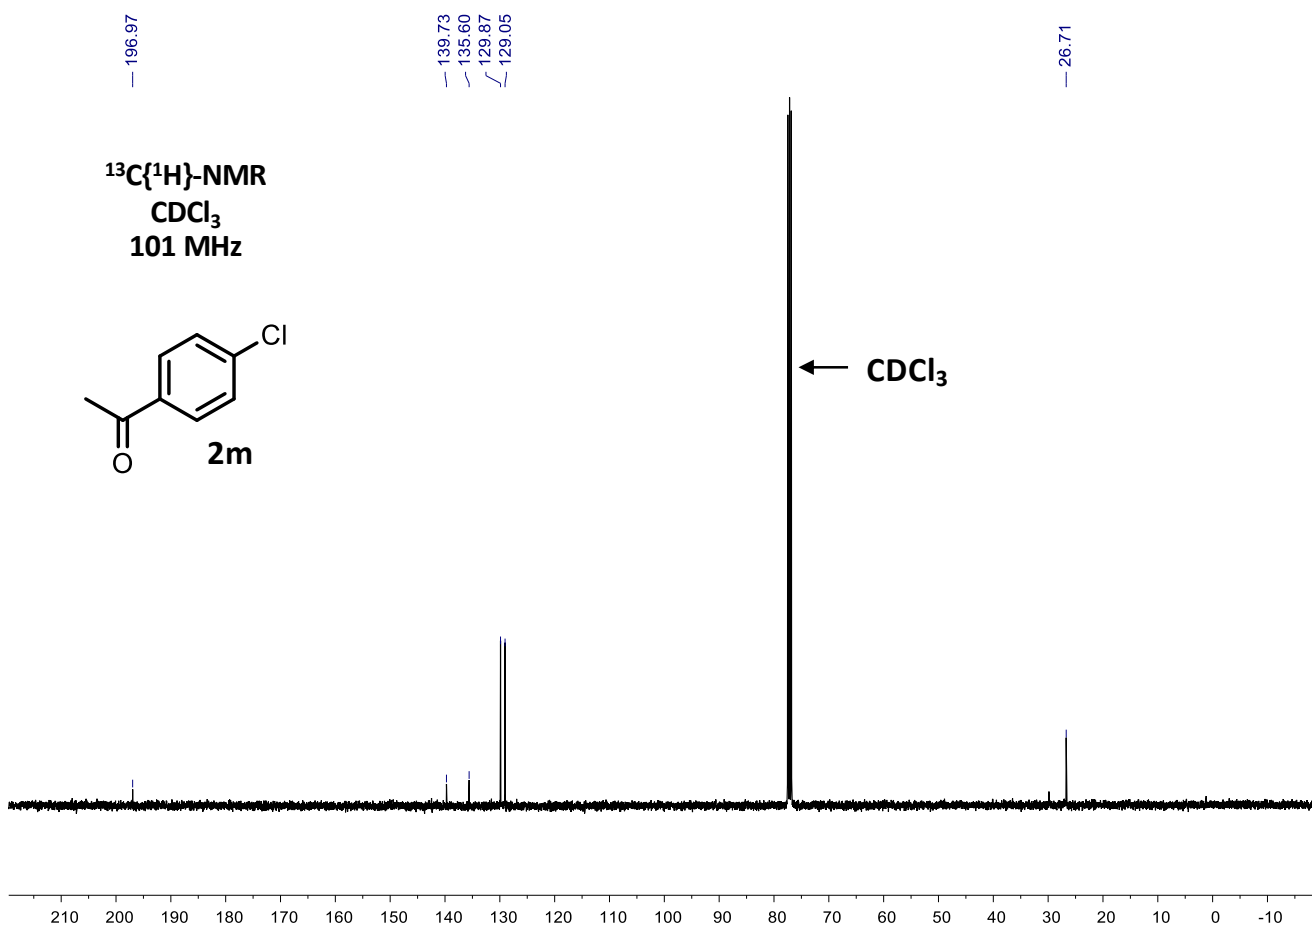

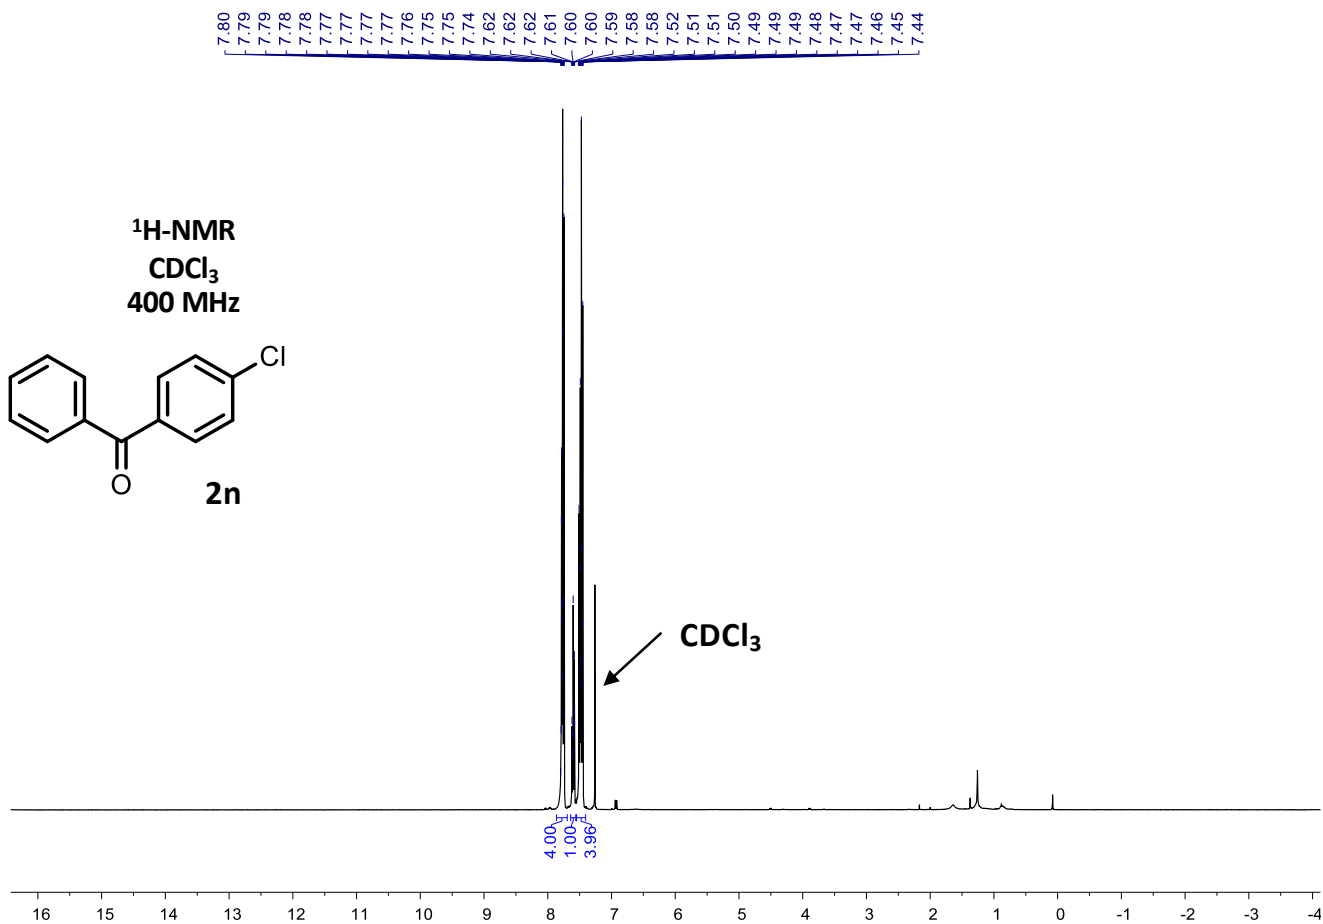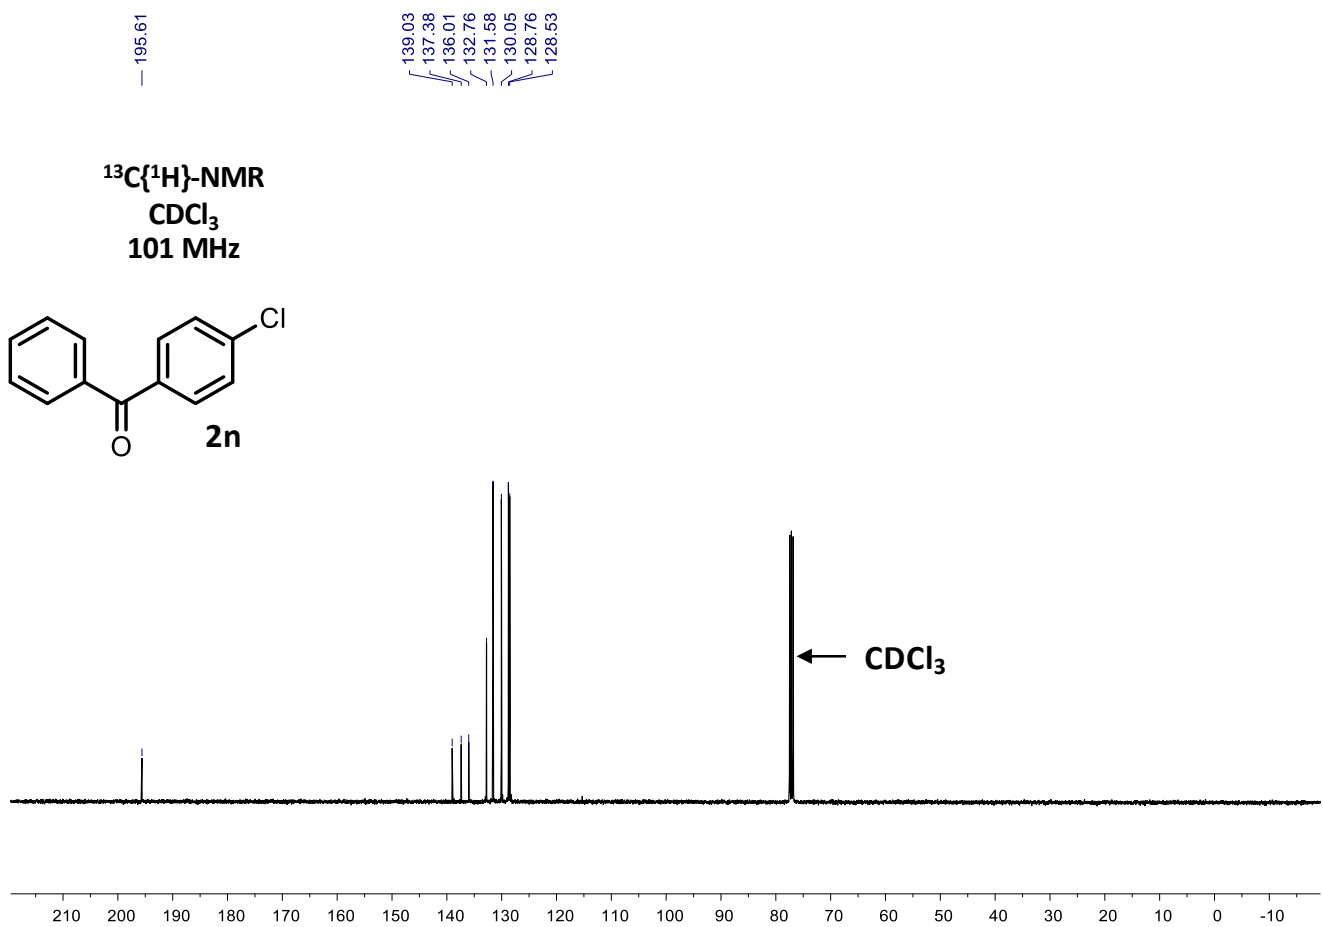

## Gas Chromatogram

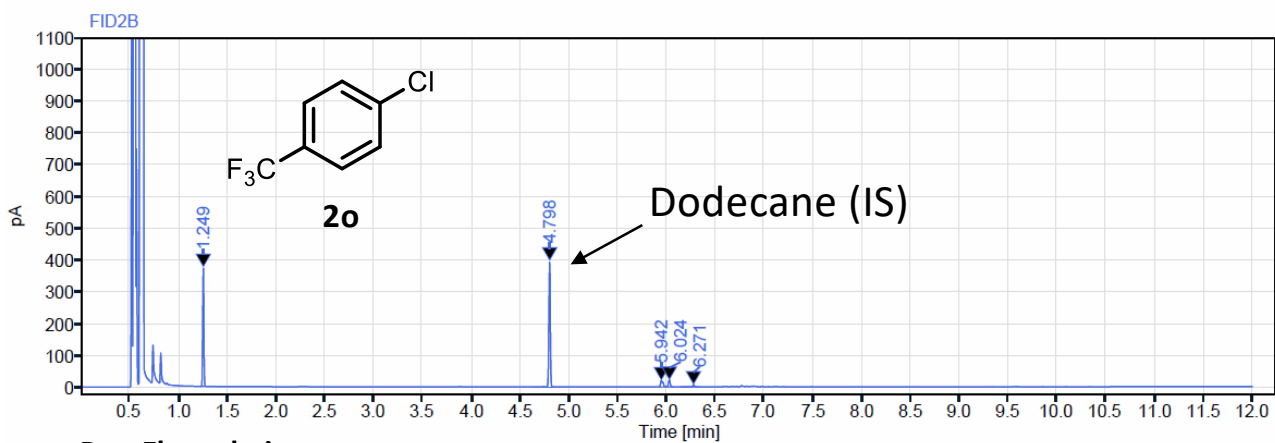

### Post Electrolysis

Signal: FID2B

| RT [min]   | Type | Width [min] | Area          | Height | Area% | Name          |
|------------|------|-------------|---------------|--------|-------|---------------|
| 1.249      | BB   | 0.15        | 313.36        | 374.48 | 39.02 |               |
| 4.798      | VV R | 0.34        | 421.47        | 396.57 | 52.48 | Dodecane (IS) |
| 5.942      | BV R | 0.08        | 34.50         | 19.94  | 4.30  |               |
| 6.024      | BB   | 0.06        | 26.59         | 21.49  | 3.31  |               |
| 6.271      | VB R | 0.19        | 7.15          | 7.17   | 0.89  |               |
| <b>Sum</b> |      |             | <b>803.07</b> |        |       |               |

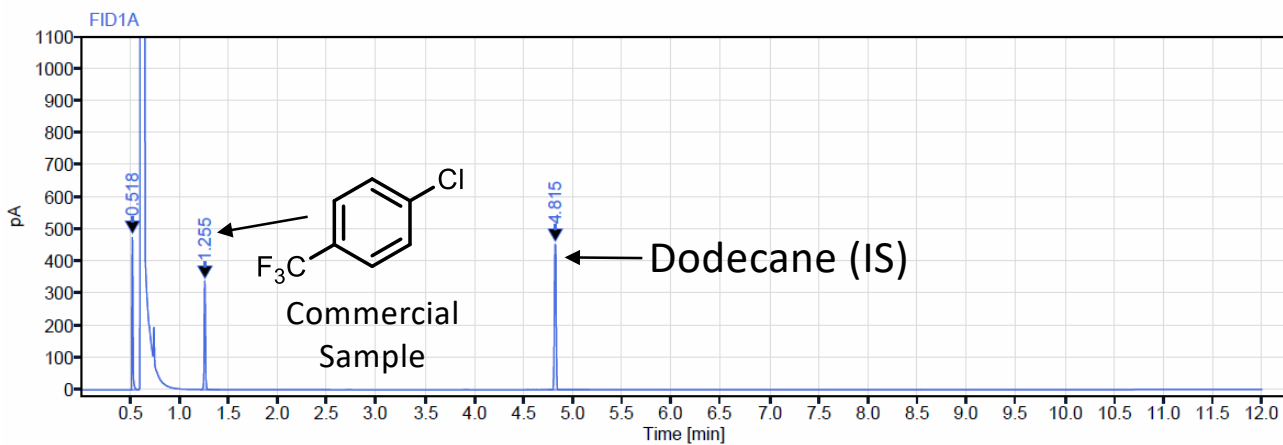

Signal: FID1A

| RT [min]   | Type | Width [min] | Area           | Height | Area% | Name          |
|------------|------|-------------|----------------|--------|-------|---------------|
| 0.518      | BB   | 0.08        | 333.32         | 485.26 | 30.05 |               |
| 1.255      | BV R | 0.19        | 291.63         | 344.31 | 26.29 |               |
| 4.815      | BV R | 0.42        | 484.15         | 460.61 | 43.65 | Dodecane (IS) |
| <b>Sum</b> |      |             | <b>1109.10</b> |        |       |               |

<sup>1</sup>H-NMR  
CDCl<sub>3</sub>  
400 MHz

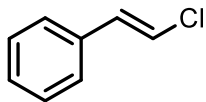

2q

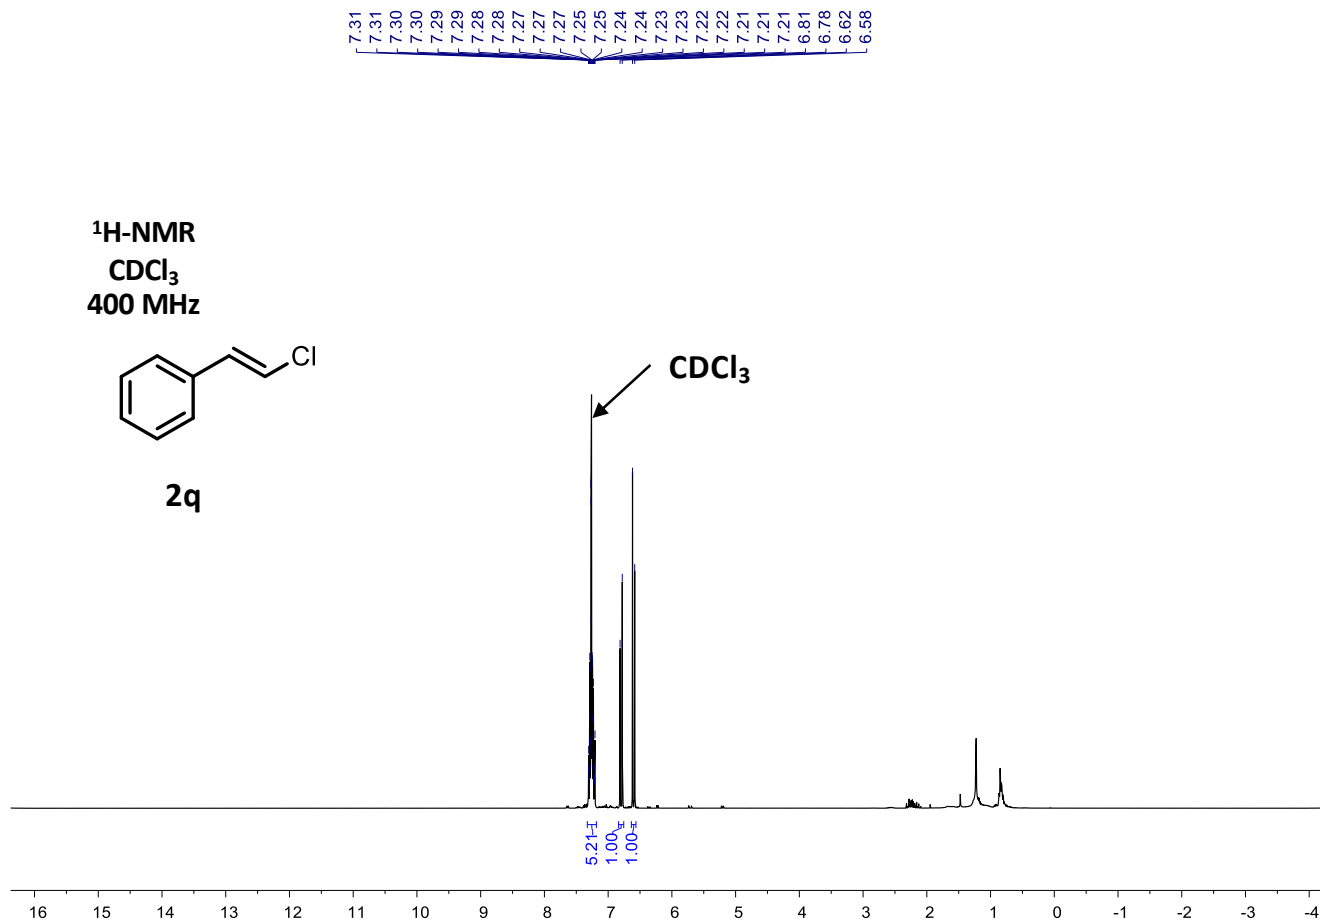

<sup>13</sup>C{<sup>1</sup>H}-NMR  
CDCl<sub>3</sub>  
101 MHz

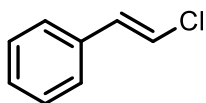

2q

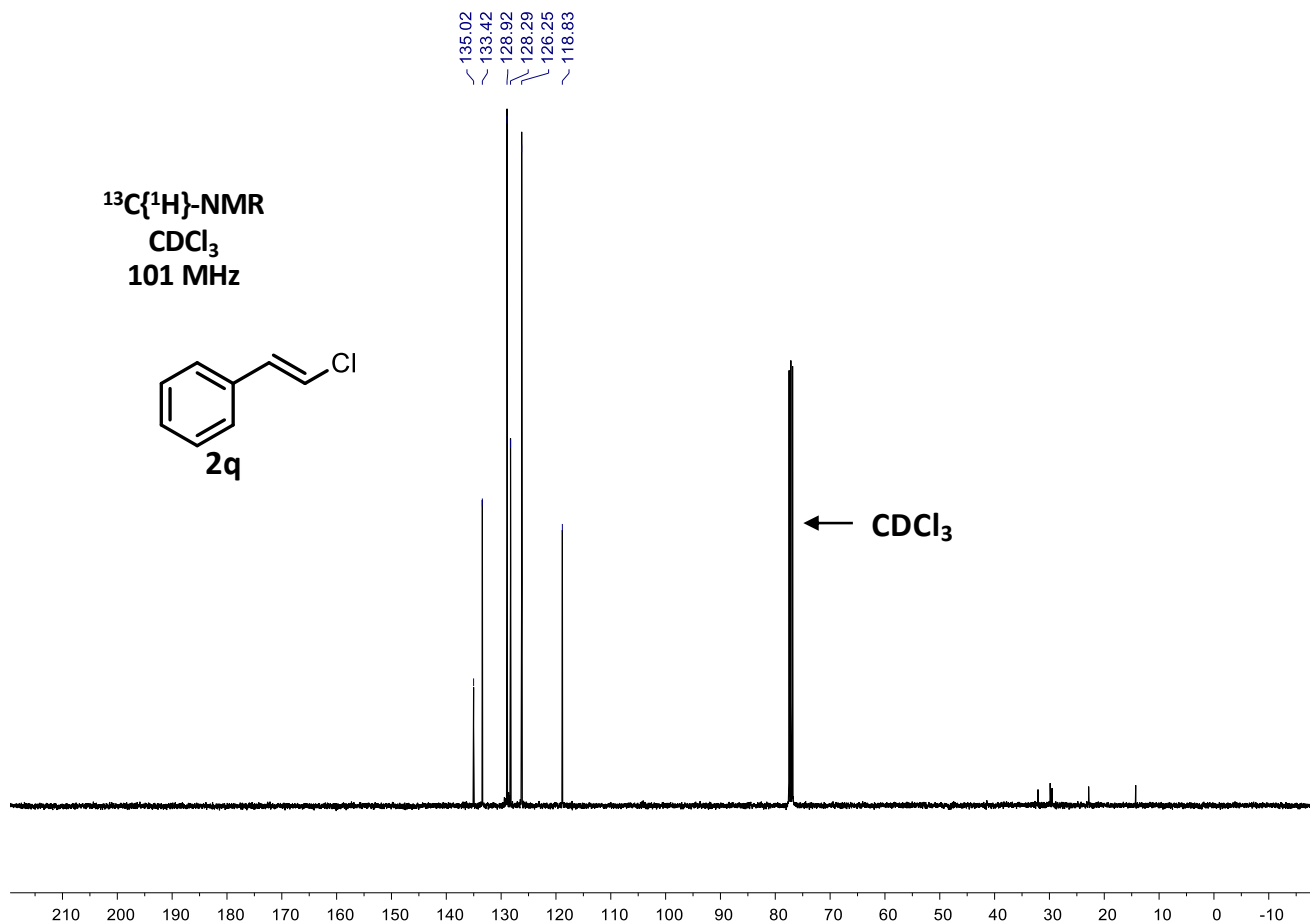

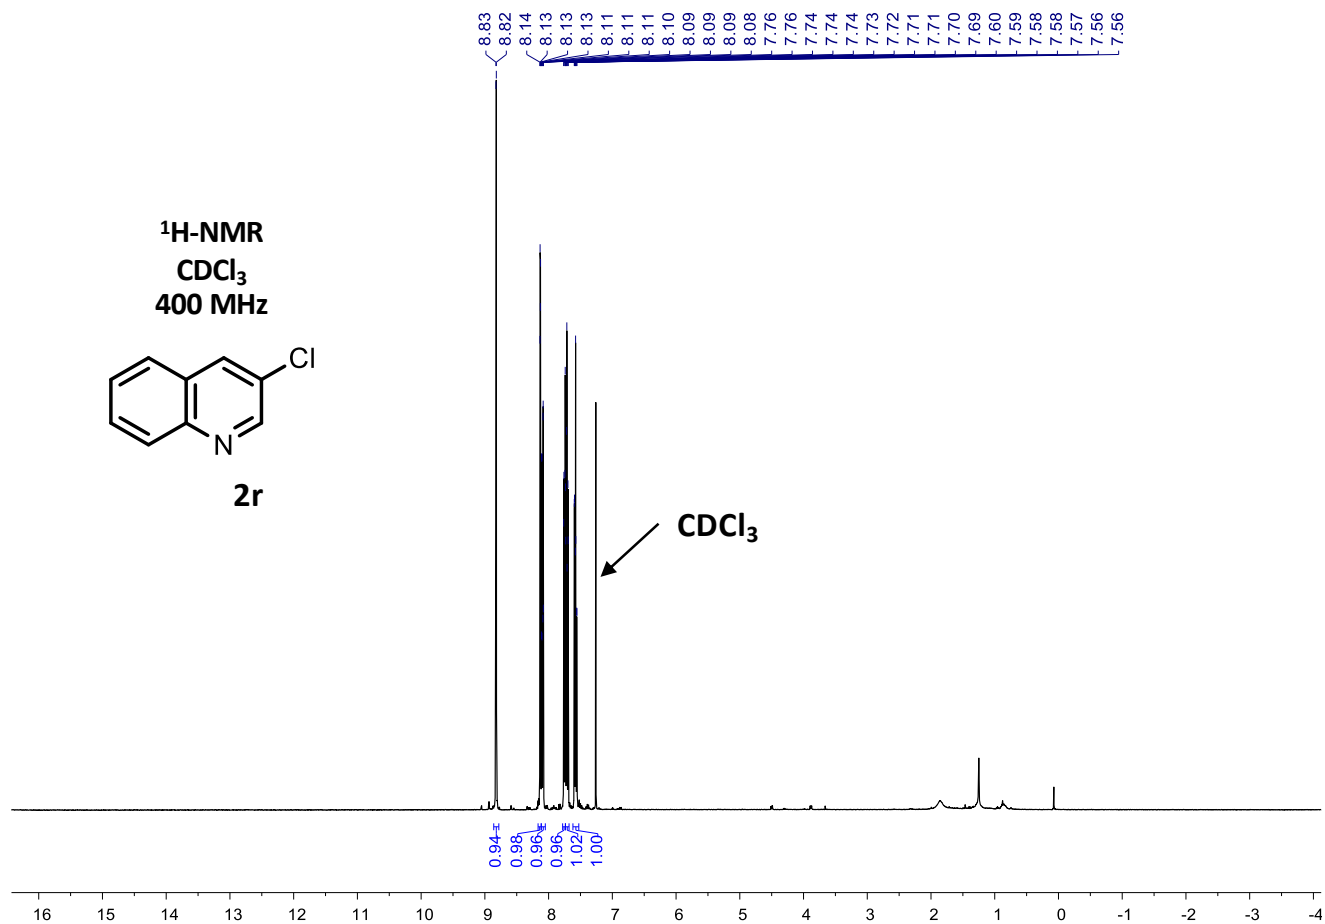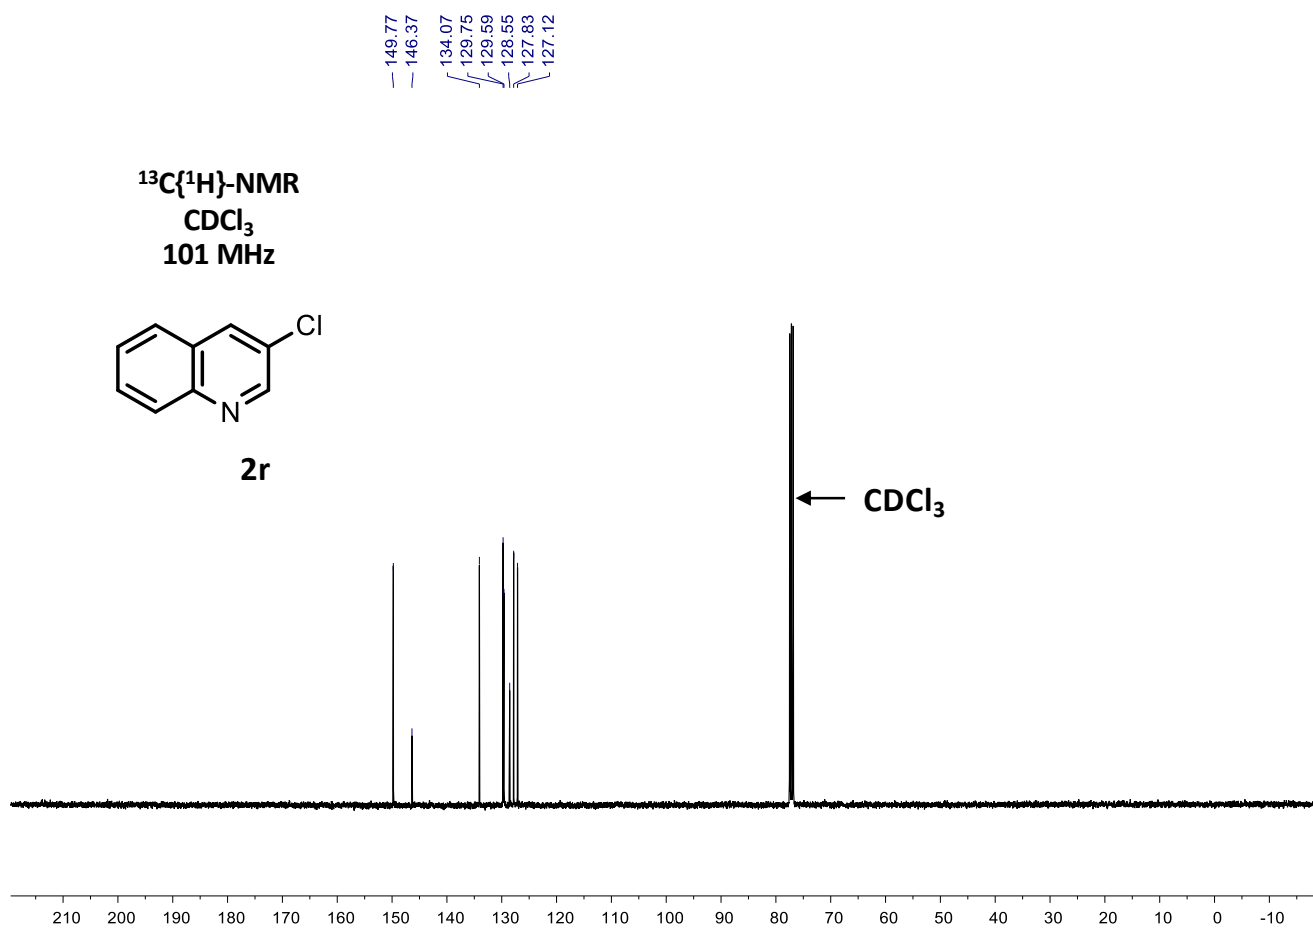

<sup>1</sup>H-NMR  
CDCl<sub>3</sub>  
400 MHz

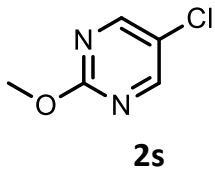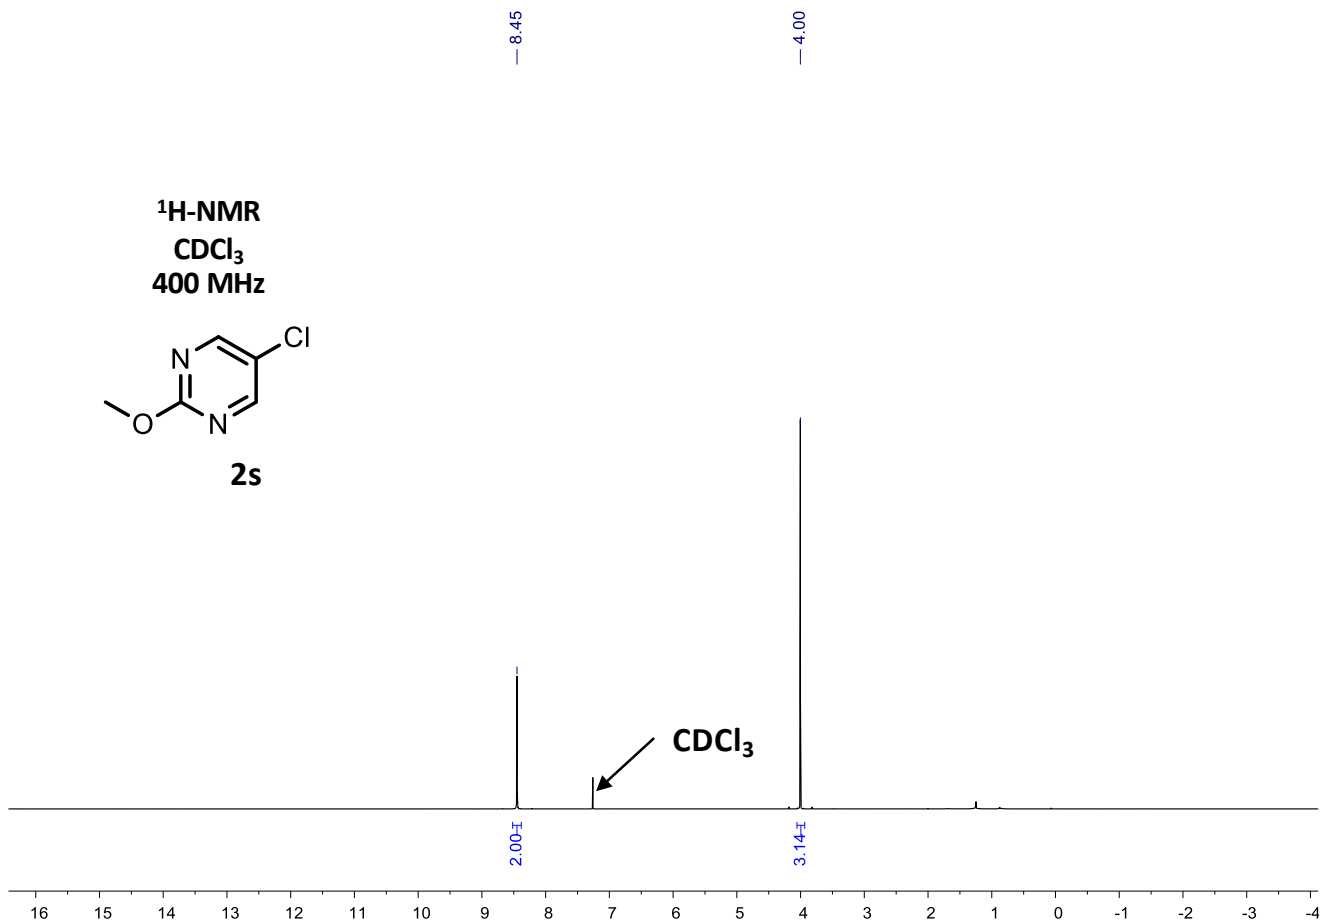

<sup>13</sup>C{<sup>1</sup>H}-NMR  
CDCl<sub>3</sub>  
101 MHz

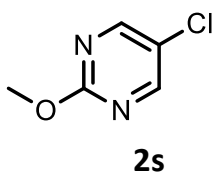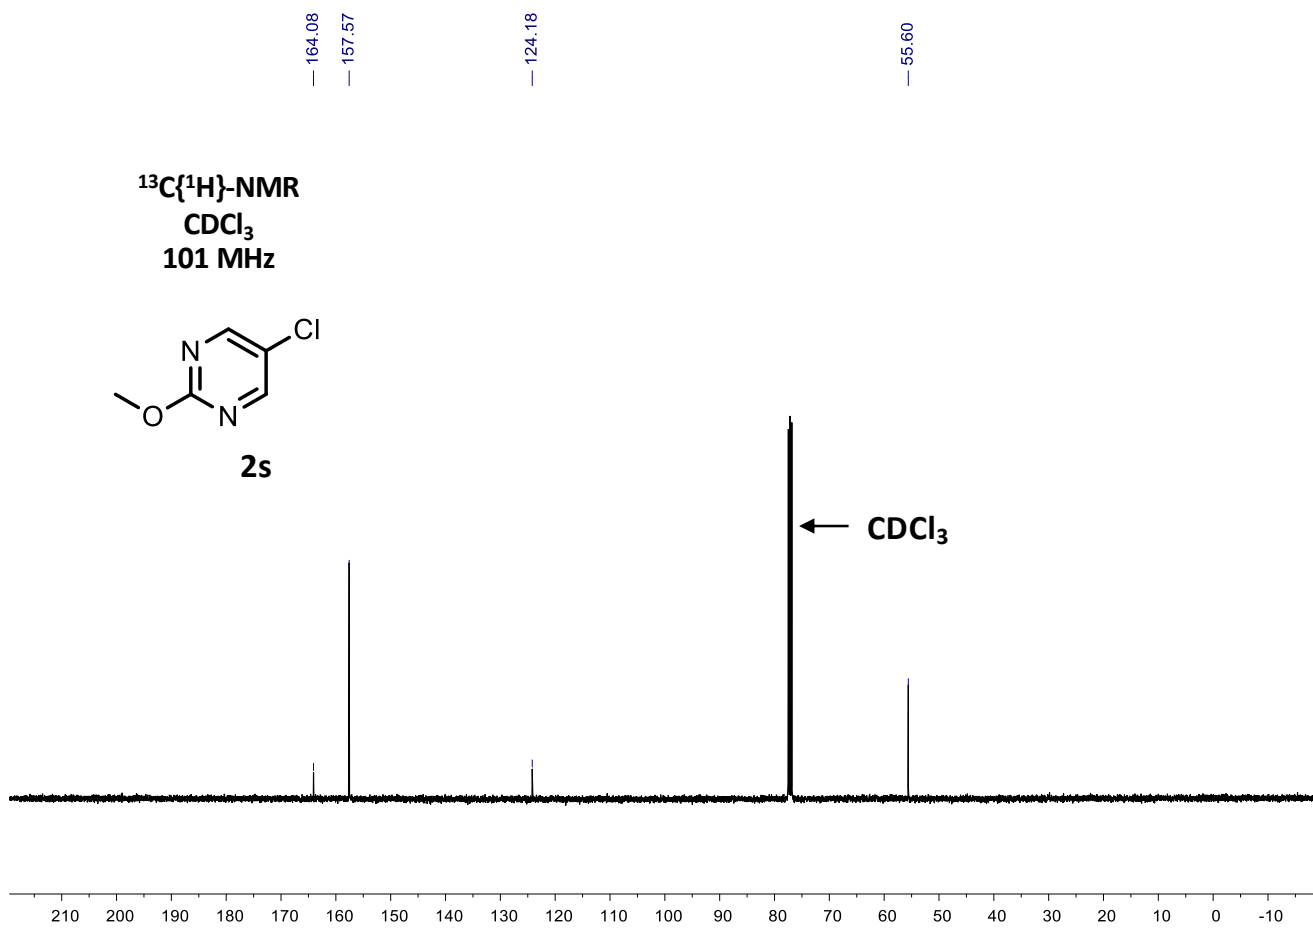

8.32  
8.31  
7.79  
7.77  
7.22  
7.21

<sup>1</sup>H-NMR  
CDCl<sub>3</sub>  
400 MHz

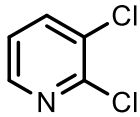

2t

CDCl<sub>3</sub>

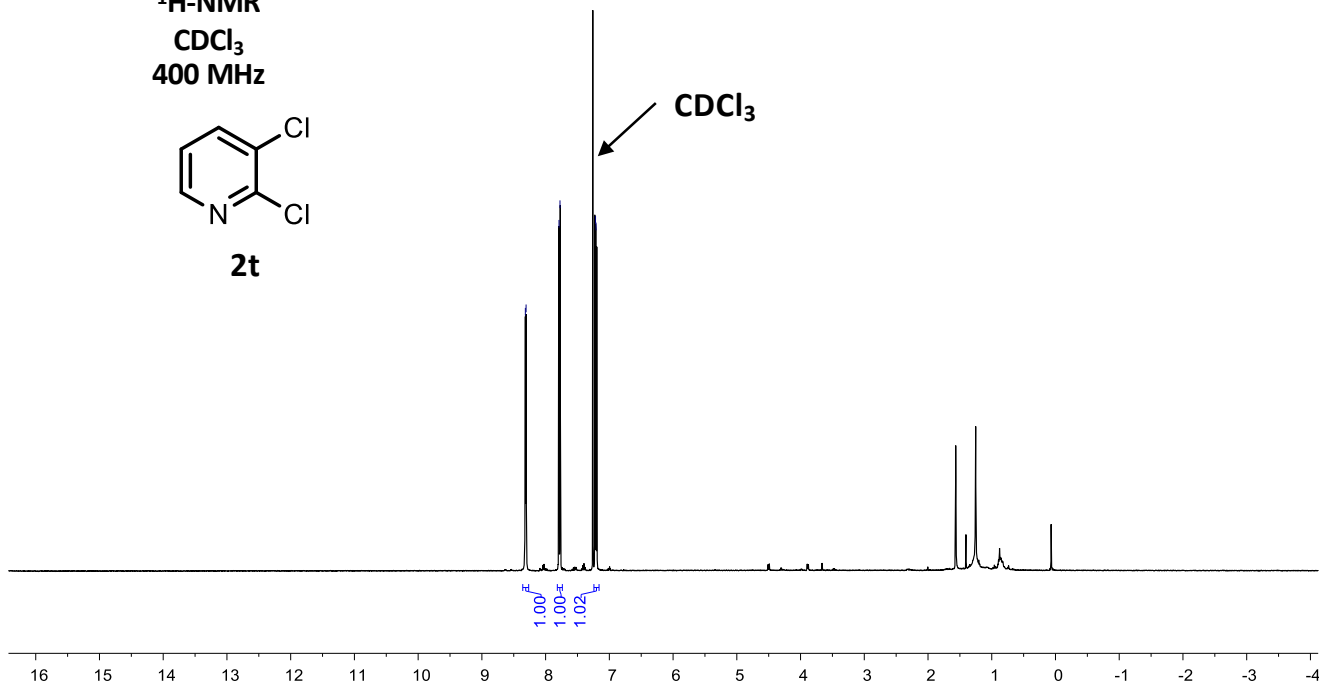

149.47  
147.45  
138.92  
130.86  
123.35

<sup>13</sup>C{<sup>1</sup>H}-NMR  
CDCl<sub>3</sub>  
101 MHz

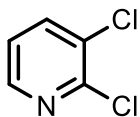

2t

CDCl<sub>3</sub>

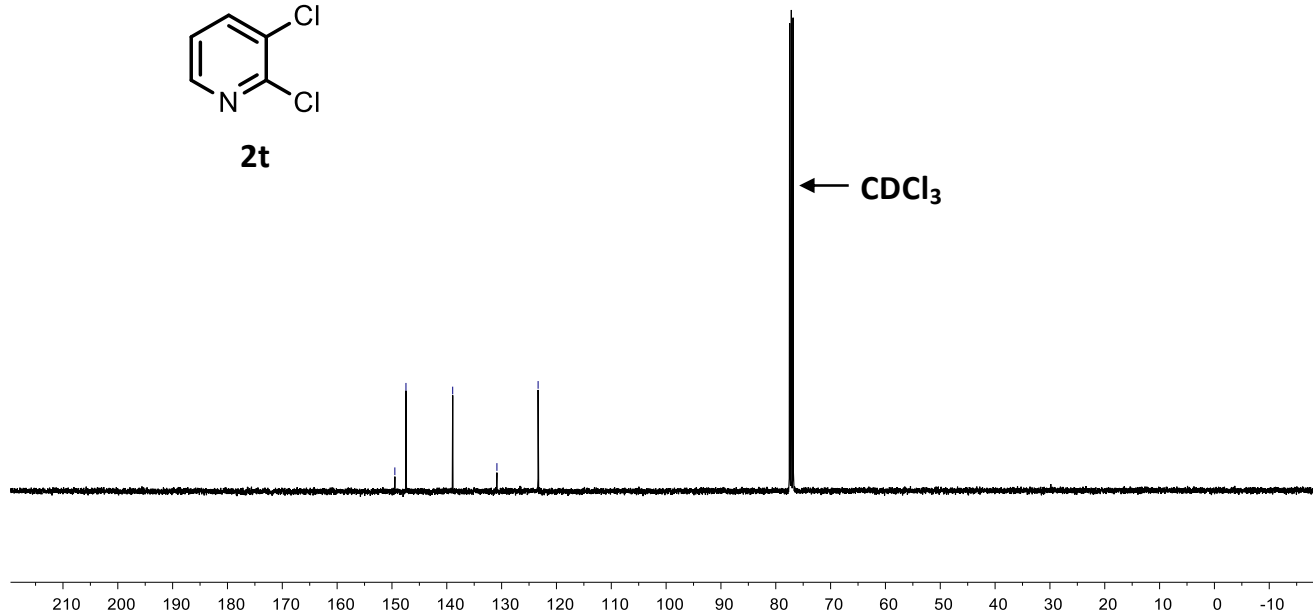



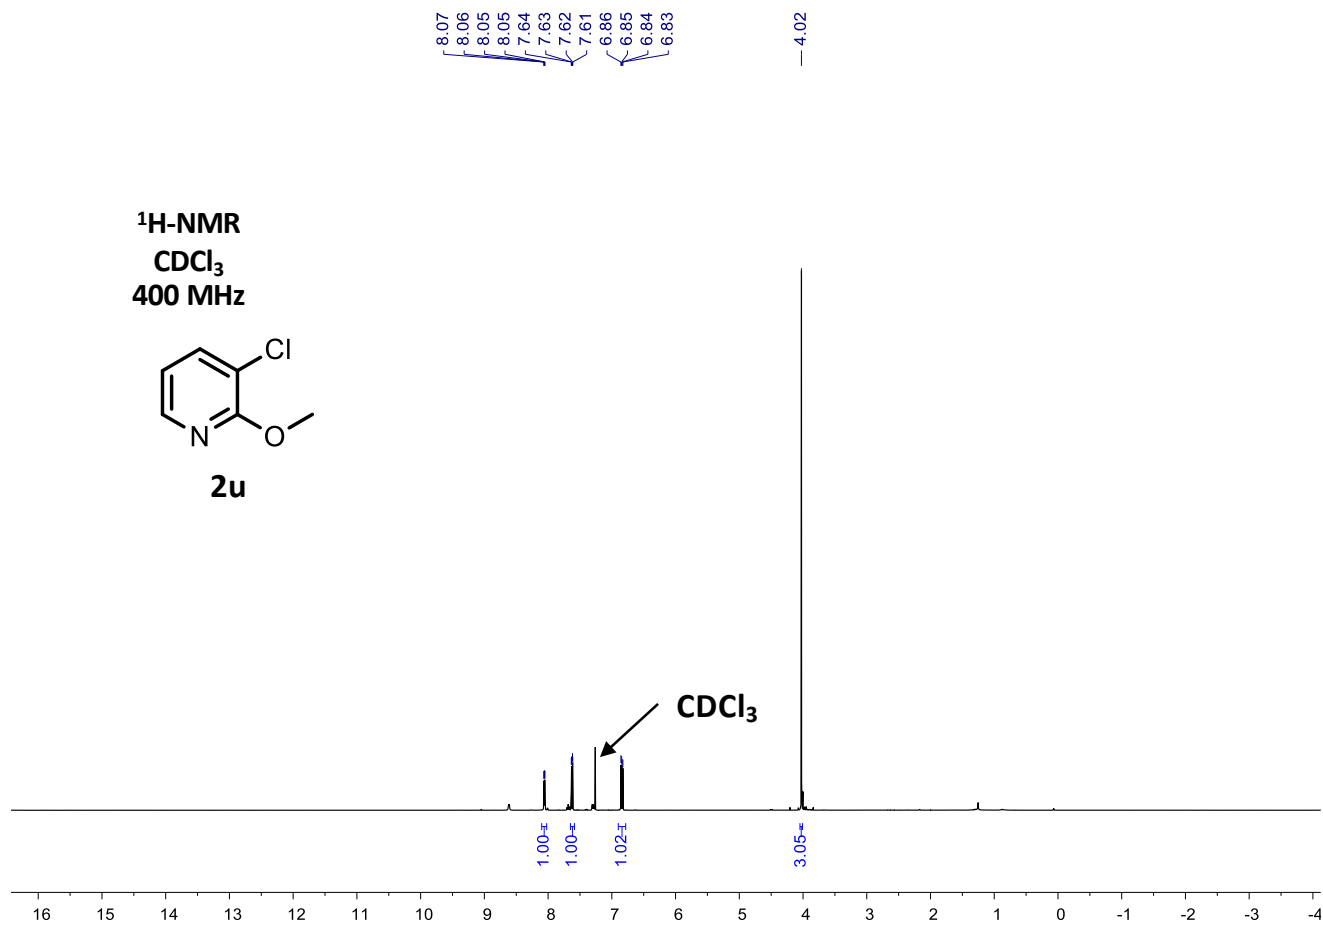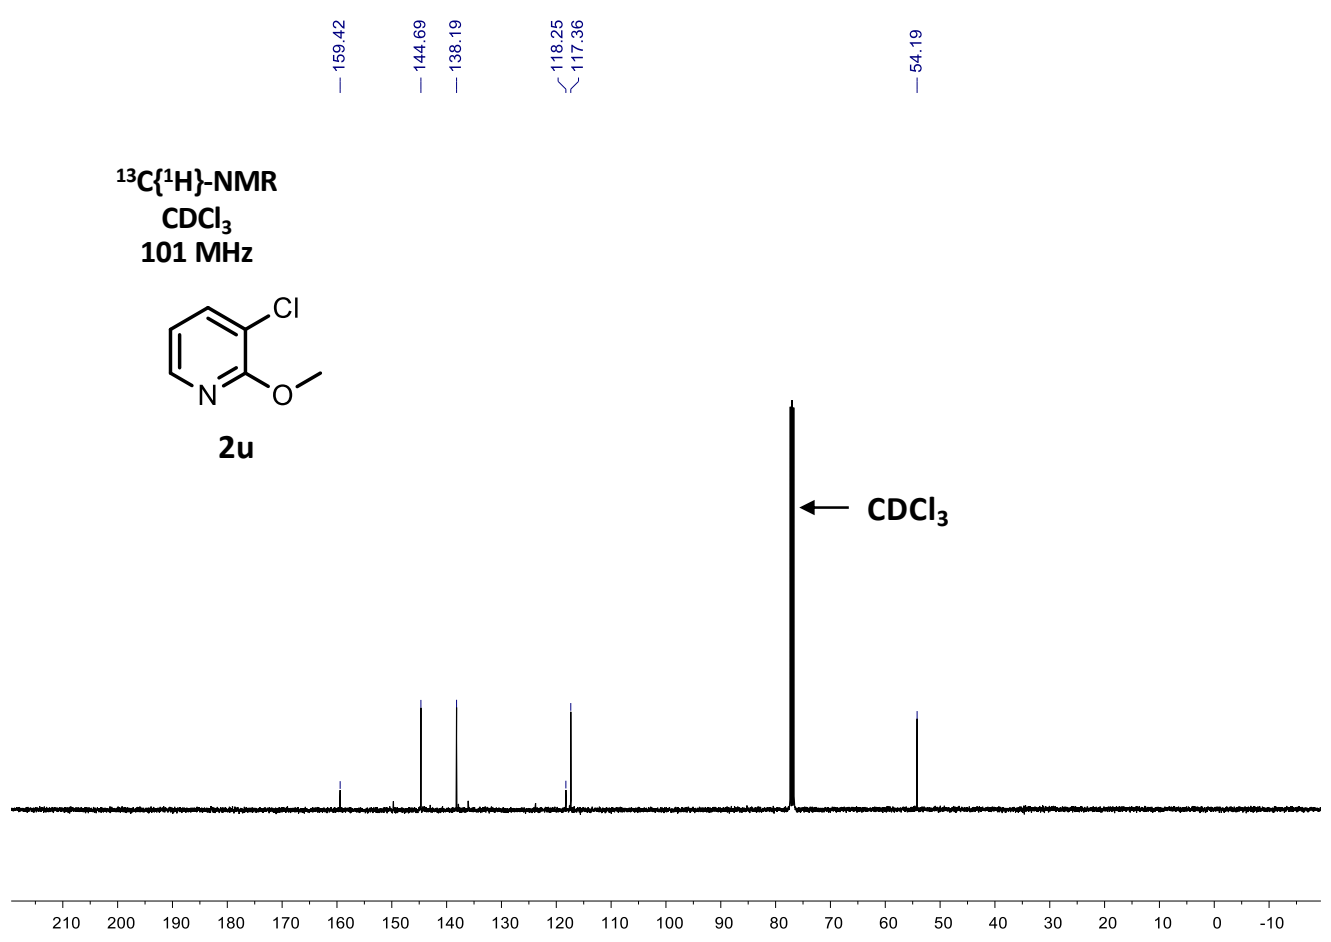

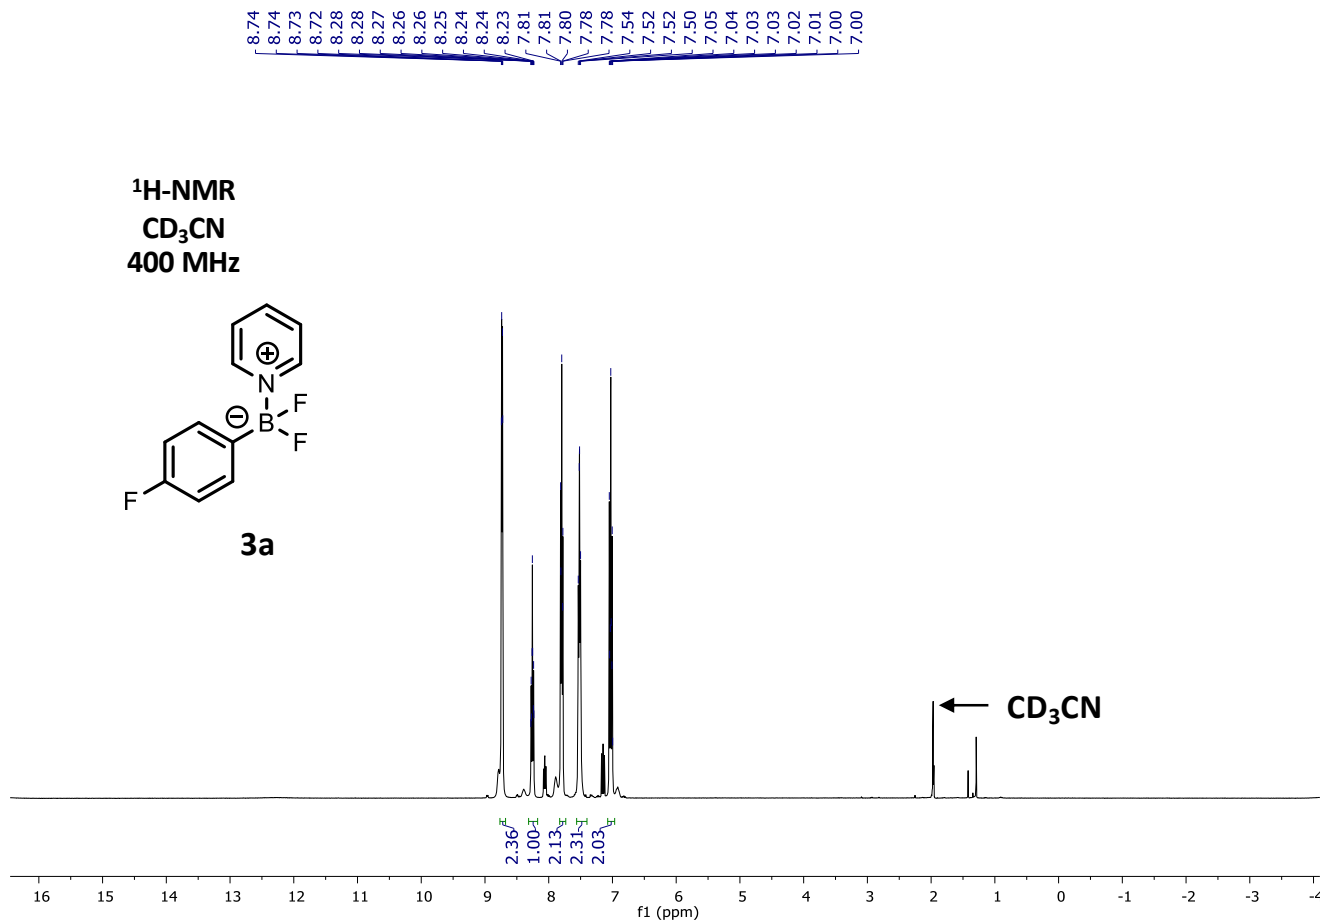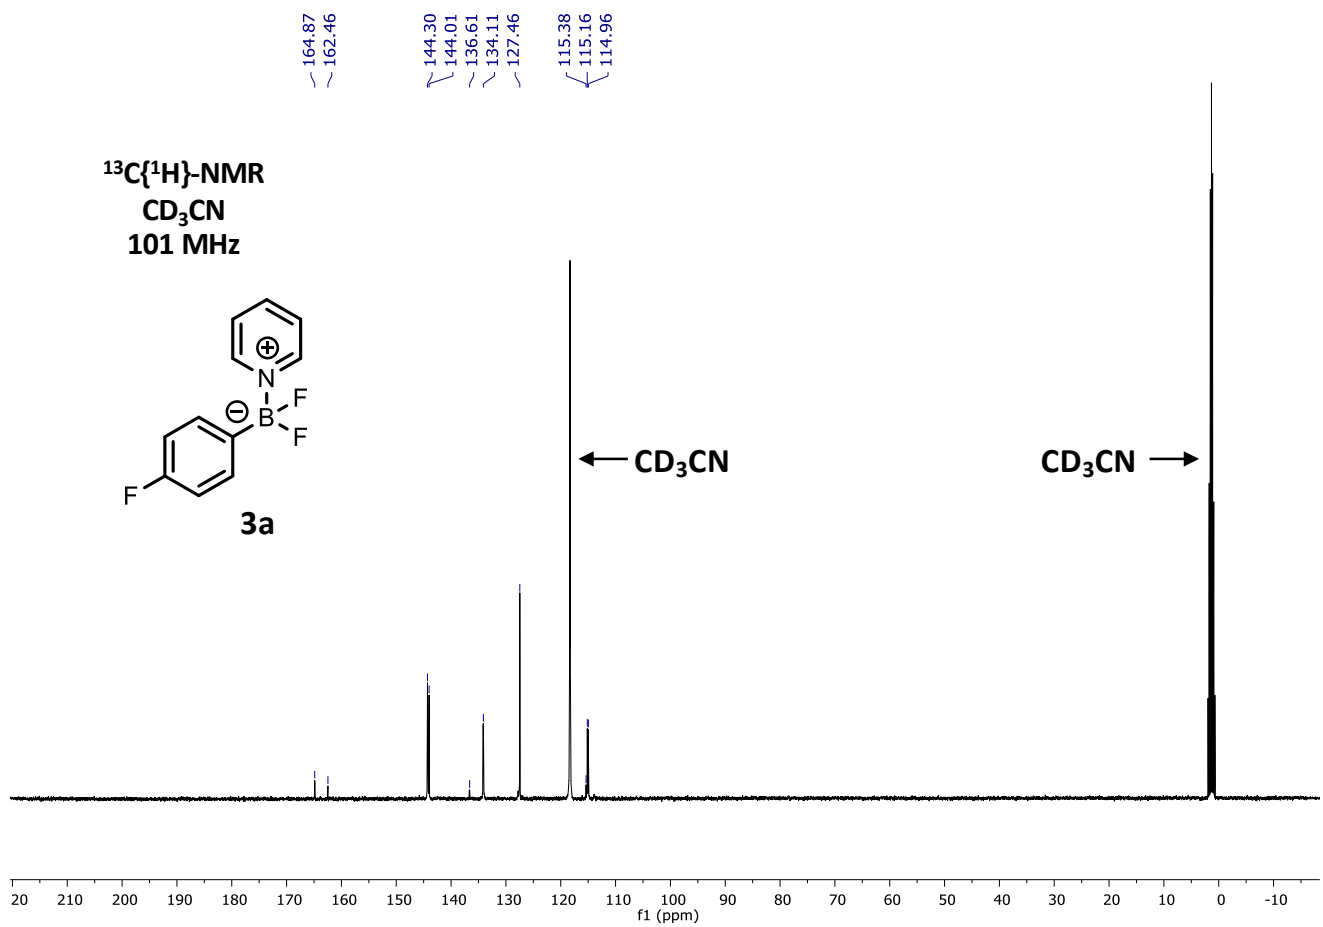

**<sup>19</sup>F-NMR**  
**CH<sub>3</sub>CN**  
**376 MHz**

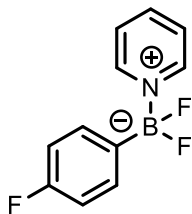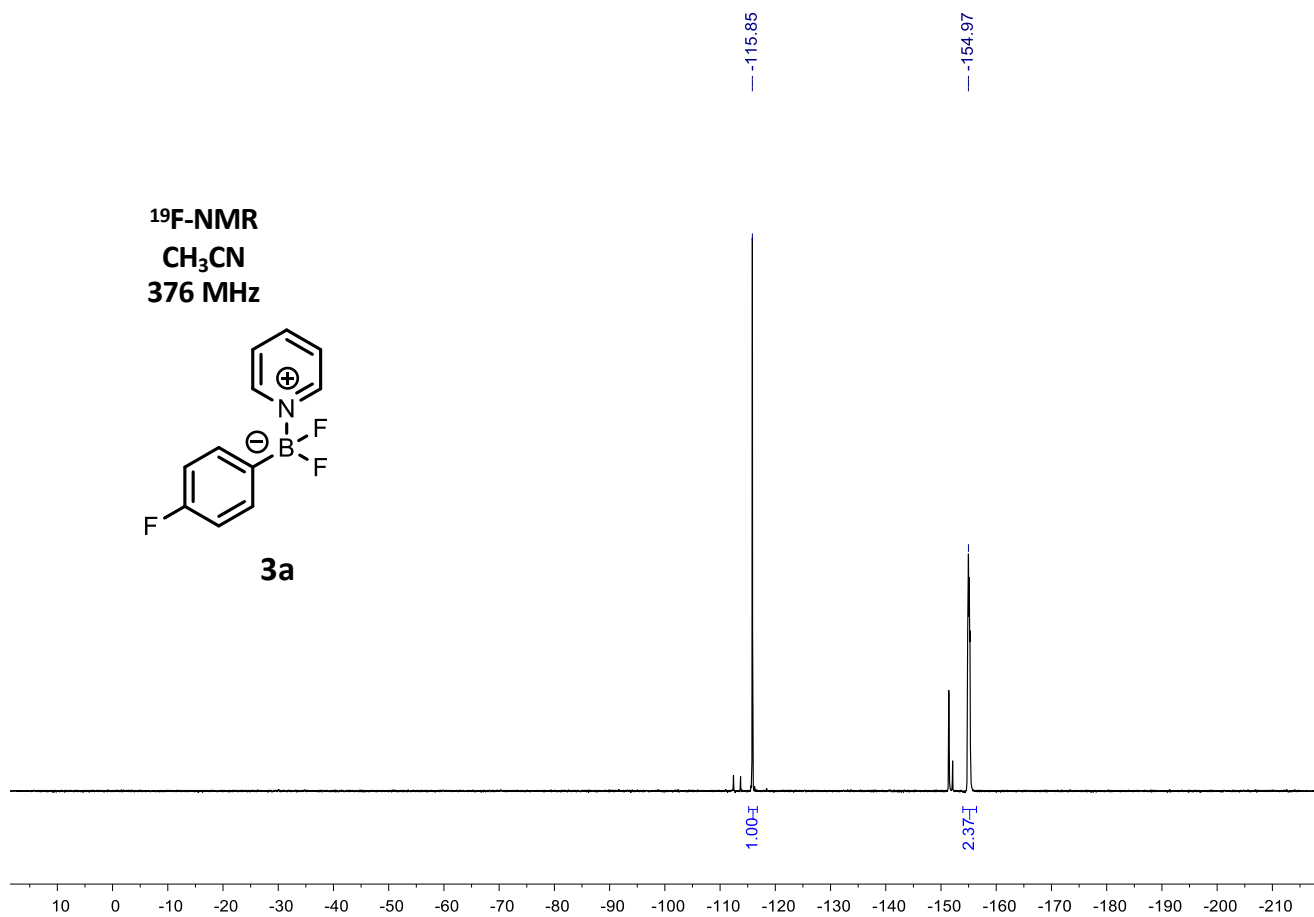

**<sup>11</sup>B-NMR**  
**CH<sub>3</sub>CN**  
**128 MHz**

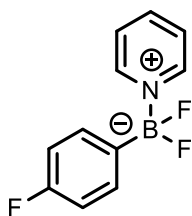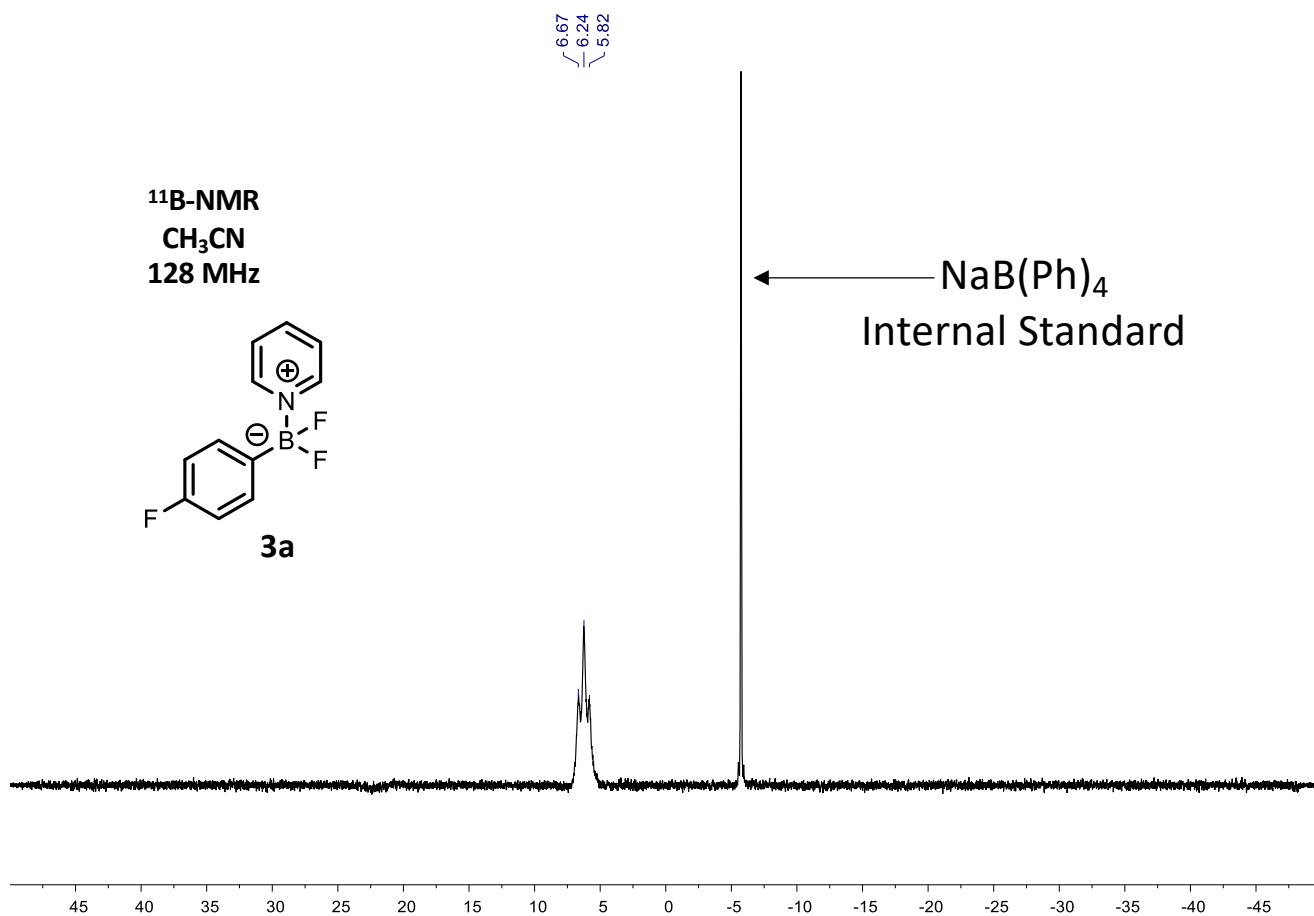

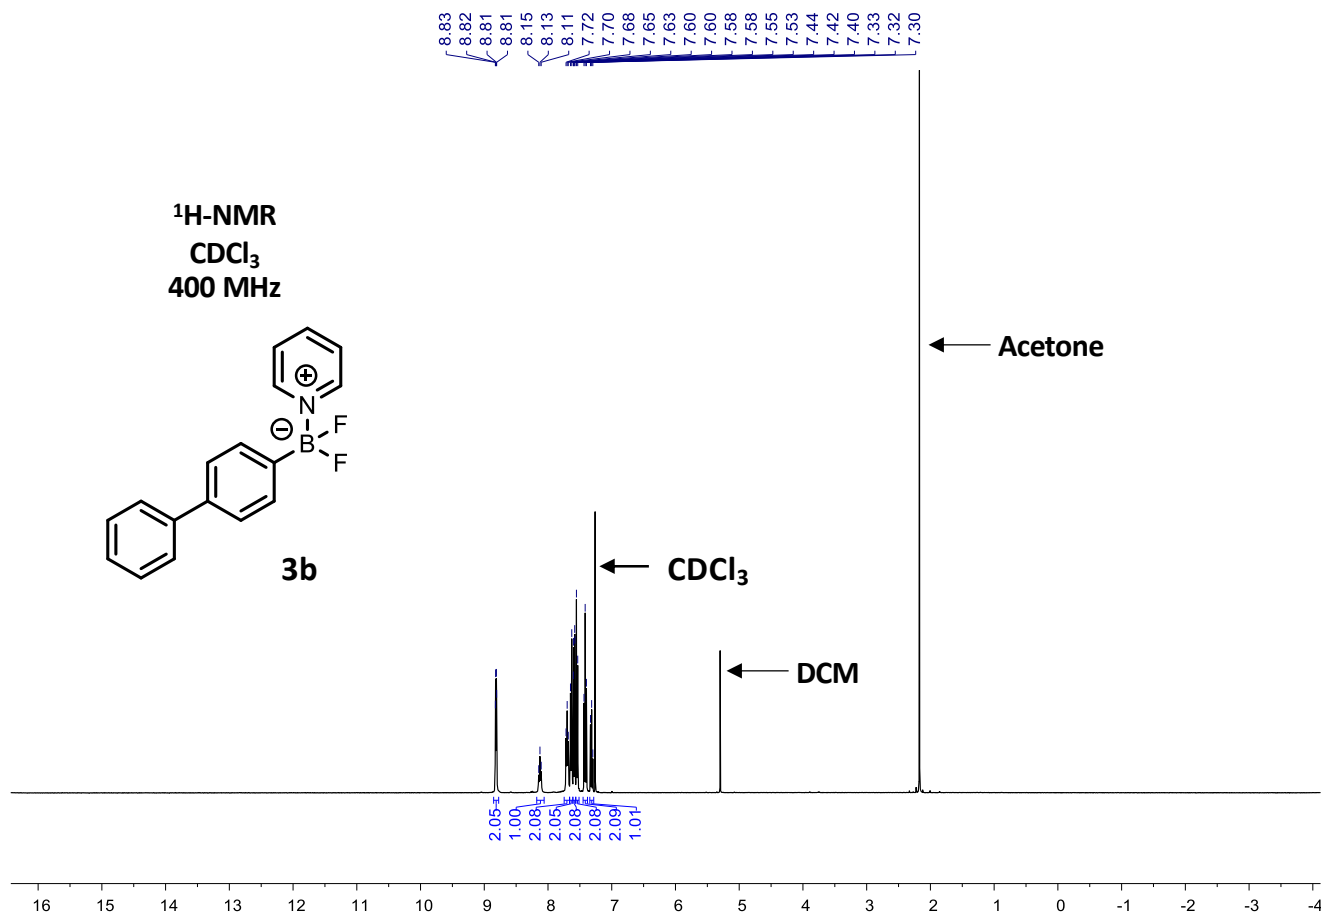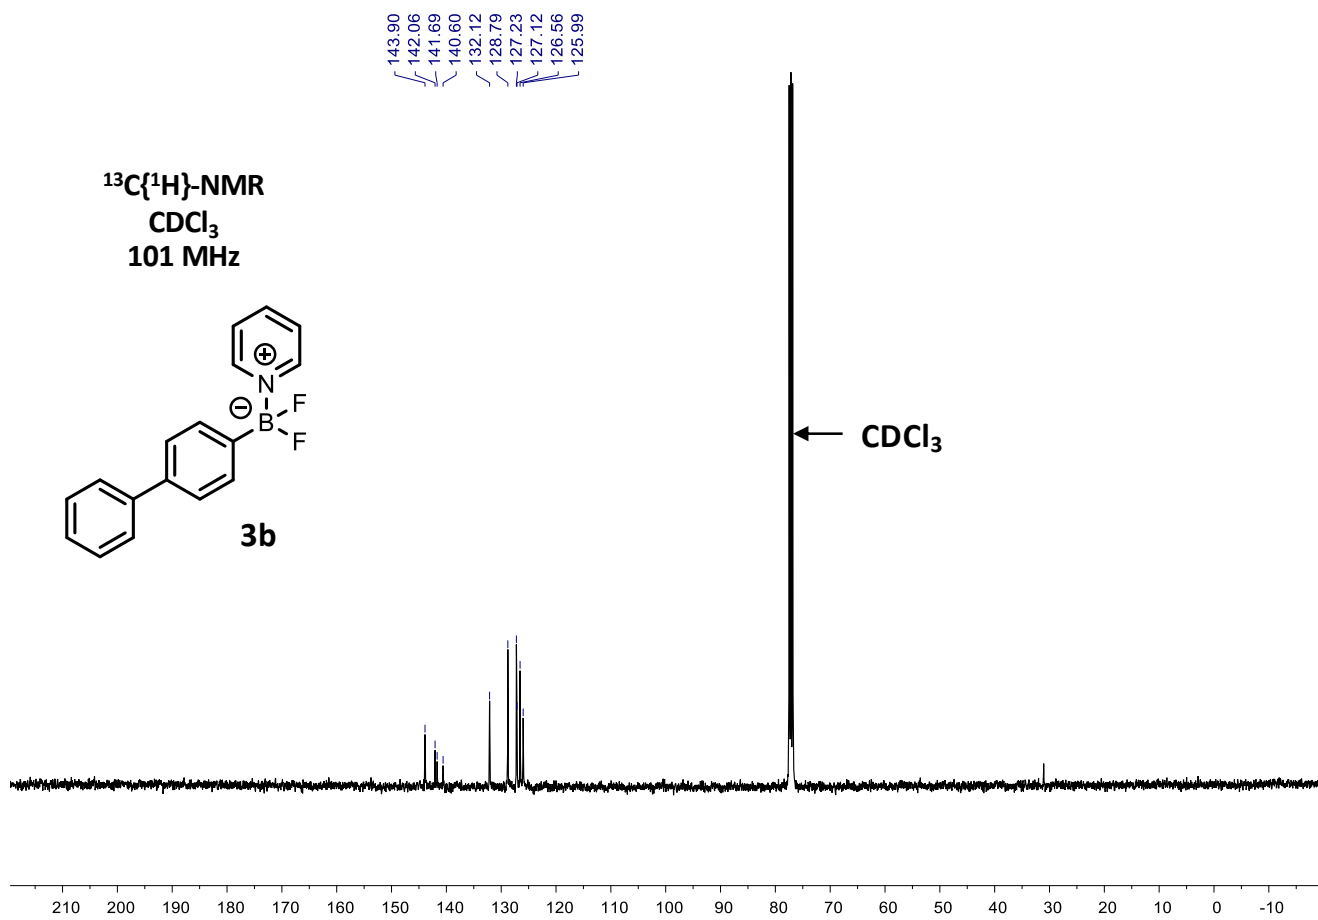

<sup>19</sup>F-NMR  
CDCl<sub>3</sub>  
376 MHz

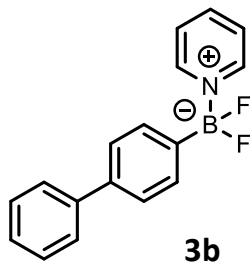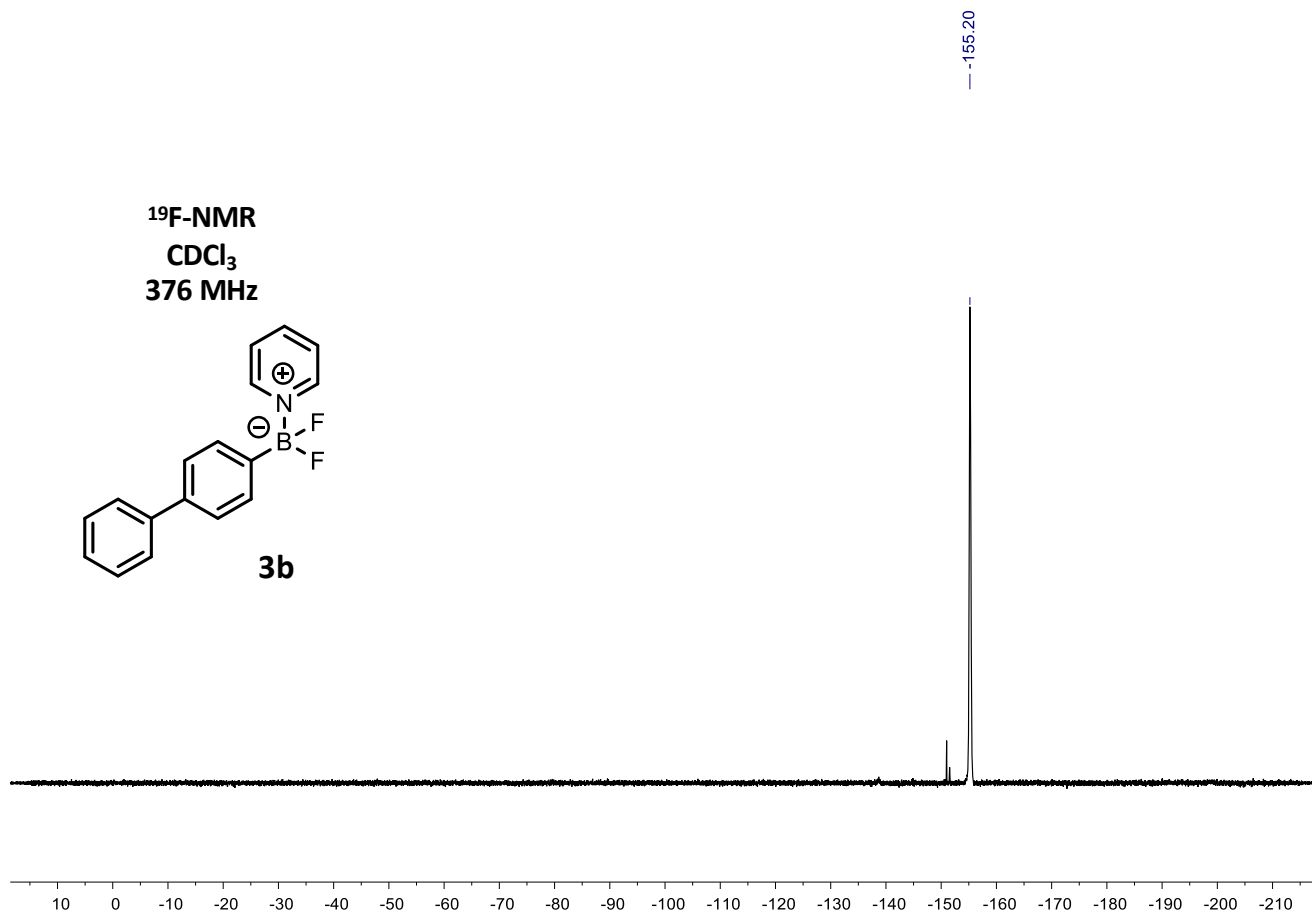

-5.97

<sup>11</sup>B-NMR  
CDCl<sub>3</sub>  
128 MHz

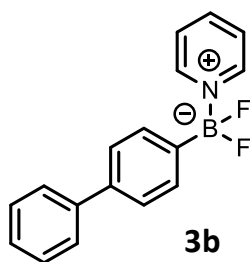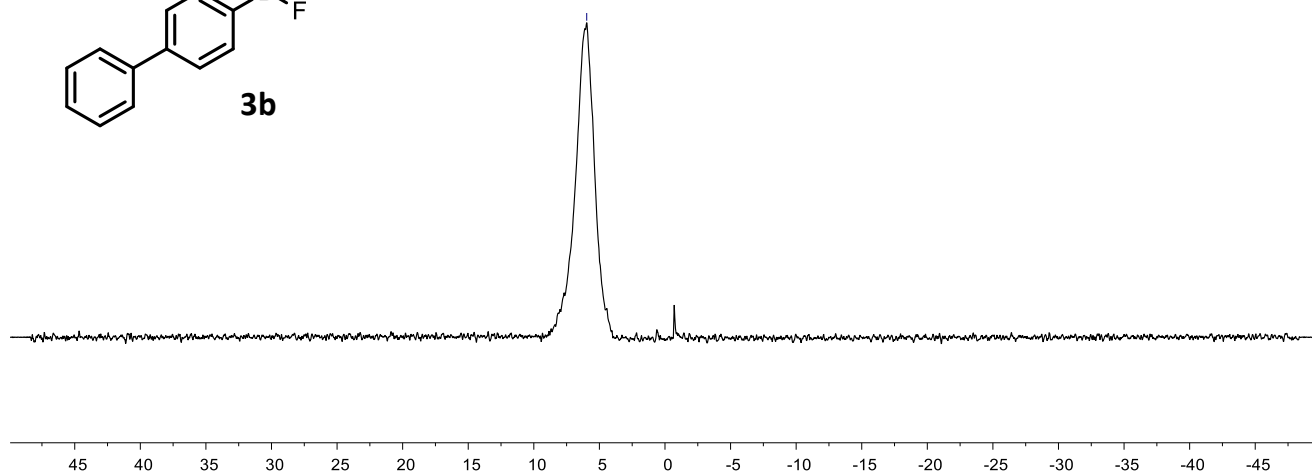

Supplement: NIHMS2040805-supplement-Supplementary_Material.pdf [file NIHMS2040805-supplement-Supplementary_Material.pdf]
